# Supplementary material for: Copper coordination compounds with (5Z,5Z′)-2,2′-(alkane-α,ω-diyldiselenyl)-bis-5-(2-pyridylmethylene)-3,5-dihydro-4H-imidazol-4-ones. Comparison with sulfur analogue
Source: Royal Society of Chemistry journal article supplement (doi:10.1039/d1ra08995a), 2022-01-01
Supplement: d1ra08995a1.pdf [file d1ra08995a1.pdf]

## Copper coordination compounds of with (5Z,5Z')-2,2'-(alkane- $\alpha,\omega$ -diyldiselenyl)-bis-5-(2-pyridylmethylene)-3,5-dihydro-4H-imidazol-4-ones. Comparison with sulfur analogues

Alexander V. Finko,<sup>a,b</sup> Anatolii I. Sokolov,<sup>a</sup> Dmitry A. Guk,<sup>a</sup> Victor A. Tafeenko,<sup>a</sup> Anna A. Moiseeva,<sup>a</sup> Dmitry A. Skvortsov,<sup>a,c</sup> Andrei A. Stomakhin,<sup>d</sup> Andrei A. Beloglazkin,<sup>a,b</sup> Roman S. Borisov,<sup>b</sup> Vladimir I. Pergushov,<sup>a</sup> Mikhail Ya. Melnikov,<sup>a</sup> Nikolay V. Zyk,<sup>a</sup> Alexander G. Majouga,<sup>a,e,f</sup> and Elena K. Beloglazkina<sup>a,\*</sup>

- 
- <sup>a.</sup> *Moscow State University, Department of Chemistry, Leninskie Gory, Building 1/3, Moscow 119991, Russia.*
- <sup>b.</sup> *Topchiev Institute of Petrochemical Synthesis RAS, Leninskii pr., 29, Moscow 119991, Russia*
- <sup>c.</sup> *Higher School of Economics, Myasnitskaya 13, Moscow 101000, Russia.*
- <sup>d.</sup> *Engelhardt Institute of Molecular Biology RAS, Vavilova 32, Moscow 119991, Russia.*
- <sup>e.</sup> *National University of Science and Technology, Leninskii pr., 4, Moscow 119049, Russia.*
- <sup>f.</sup> *Mendeleev University of Chemical Technology, Miusskaya pl. 9, Moscow 125047, Russia.*

### Supplementary Information

#### Table of Content

|                                                                                                                                                  |          |
|--------------------------------------------------------------------------------------------------------------------------------------------------|----------|
| NMR ( <sup>1</sup> H and <sup>13</sup> C) and FTIR spectra                                                                                       | Page 2   |
| FTIR spectra of complex compounds                                                                                                                | Page 44  |
| Voltammograms (Figures 1S - 22S).                                                                                                                | Page 56  |
| Table S1. Electrochemical reduction and oxidation potentials of ligands and complexes                                                            | Page 78  |
| Figure 23S. <sup>1</sup> H NMR monitoring of the reaction mixture of ligand <b>4c</b> with CuCl <sub>2</sub> ·2H <sub>2</sub> O in DMF and DMSO. | Page 79  |
| Figure 24 S. MALDI spectra of complex <b>5c</b> on different matrices                                                                            | Page 80  |
| X-Ray analysis (Tables 2S - 25S)                                                                                                                 | Page 84  |
| UV-vis spectra (Figures 25S-31S)                                                                                                                 | Page 110 |
| EPR spectra (Figures 32S-36S)                                                                                                                    | Page 113 |

NMR  $^1\text{H}$  (Z)-3-(4-ethoxyphenyl)-5-(pyridin-2-ylmethylene)-2-selenoximidazolidin-4-one (**3a**)

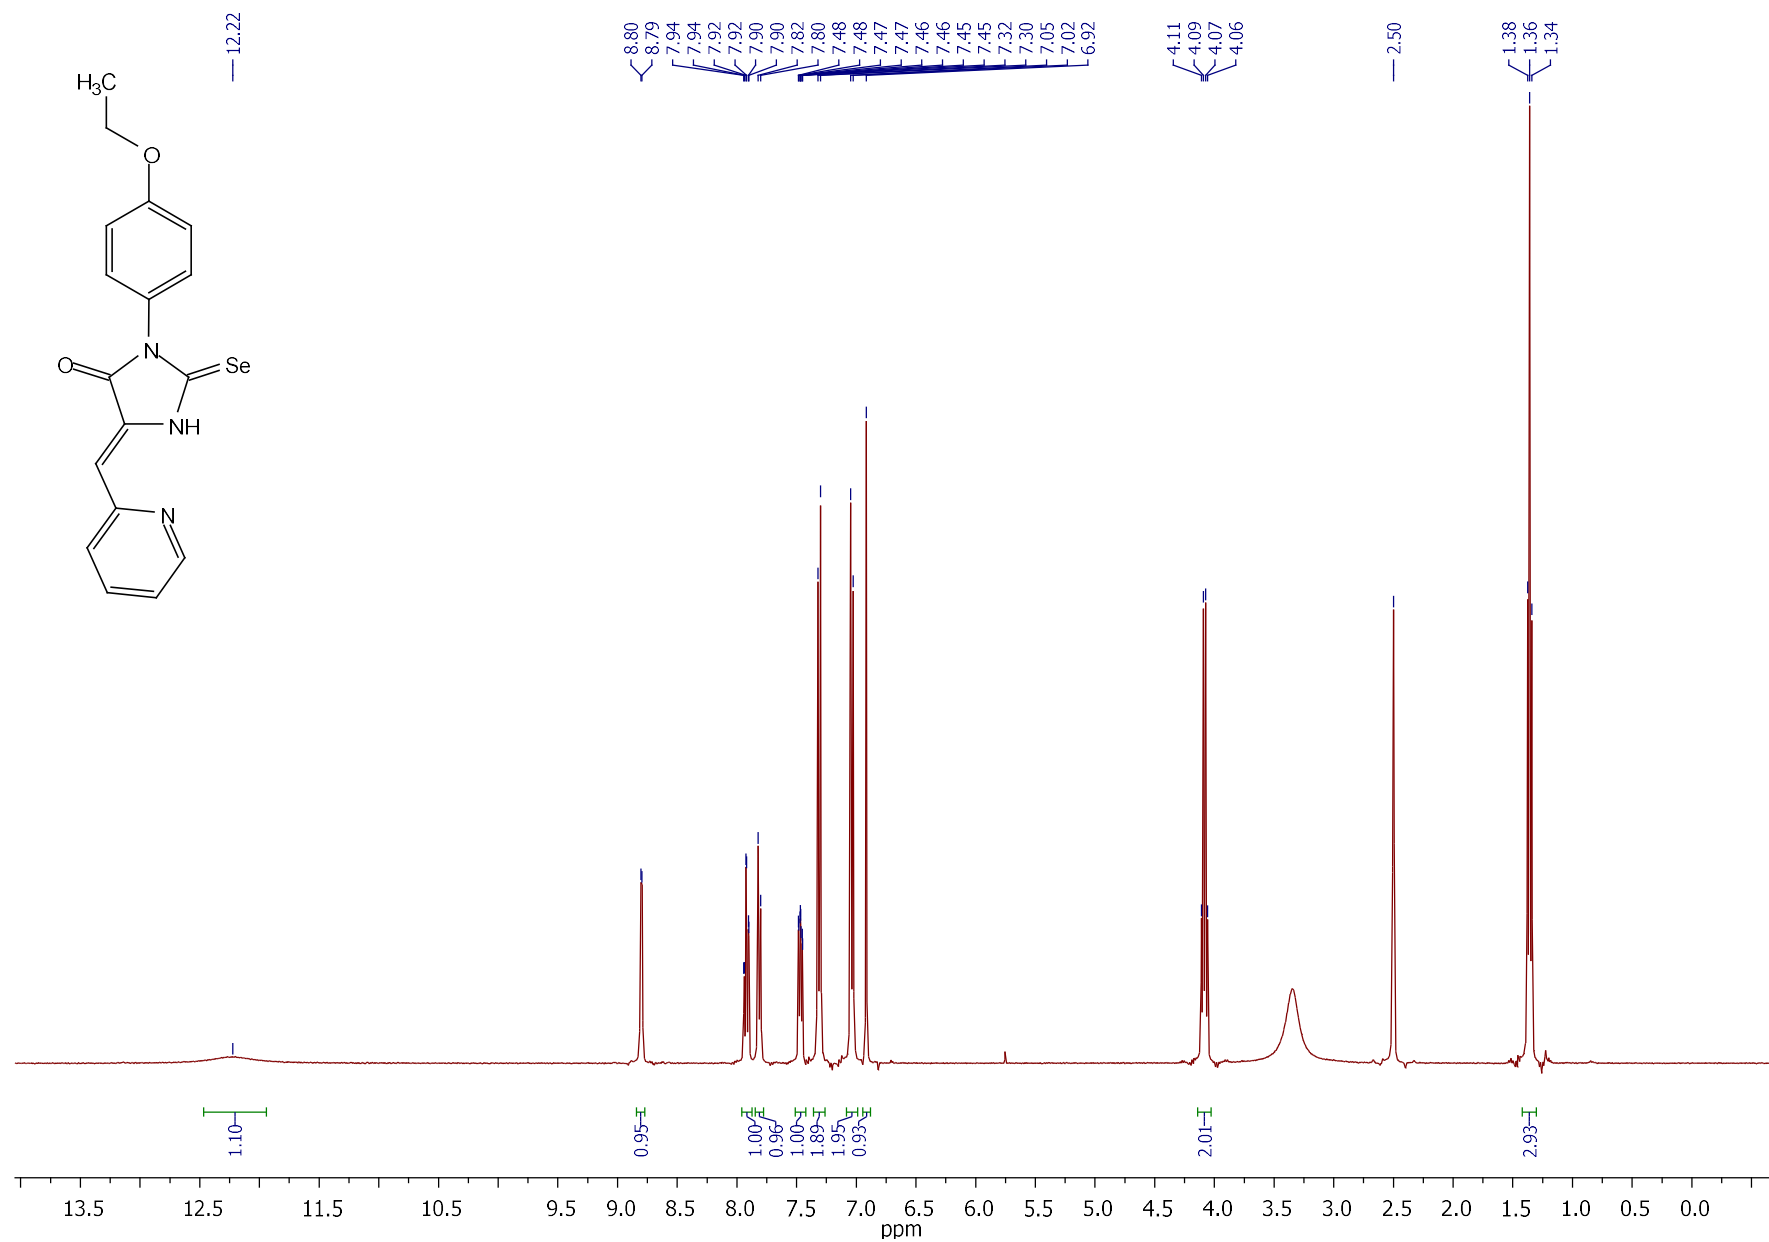

NMR  $^{13}\text{C}$  (Z)-3-(4-ethoxyphenyl)-5-(pyridin-2-ylmethylene)-2-selenoximidazolidin-4-one (**3a**)

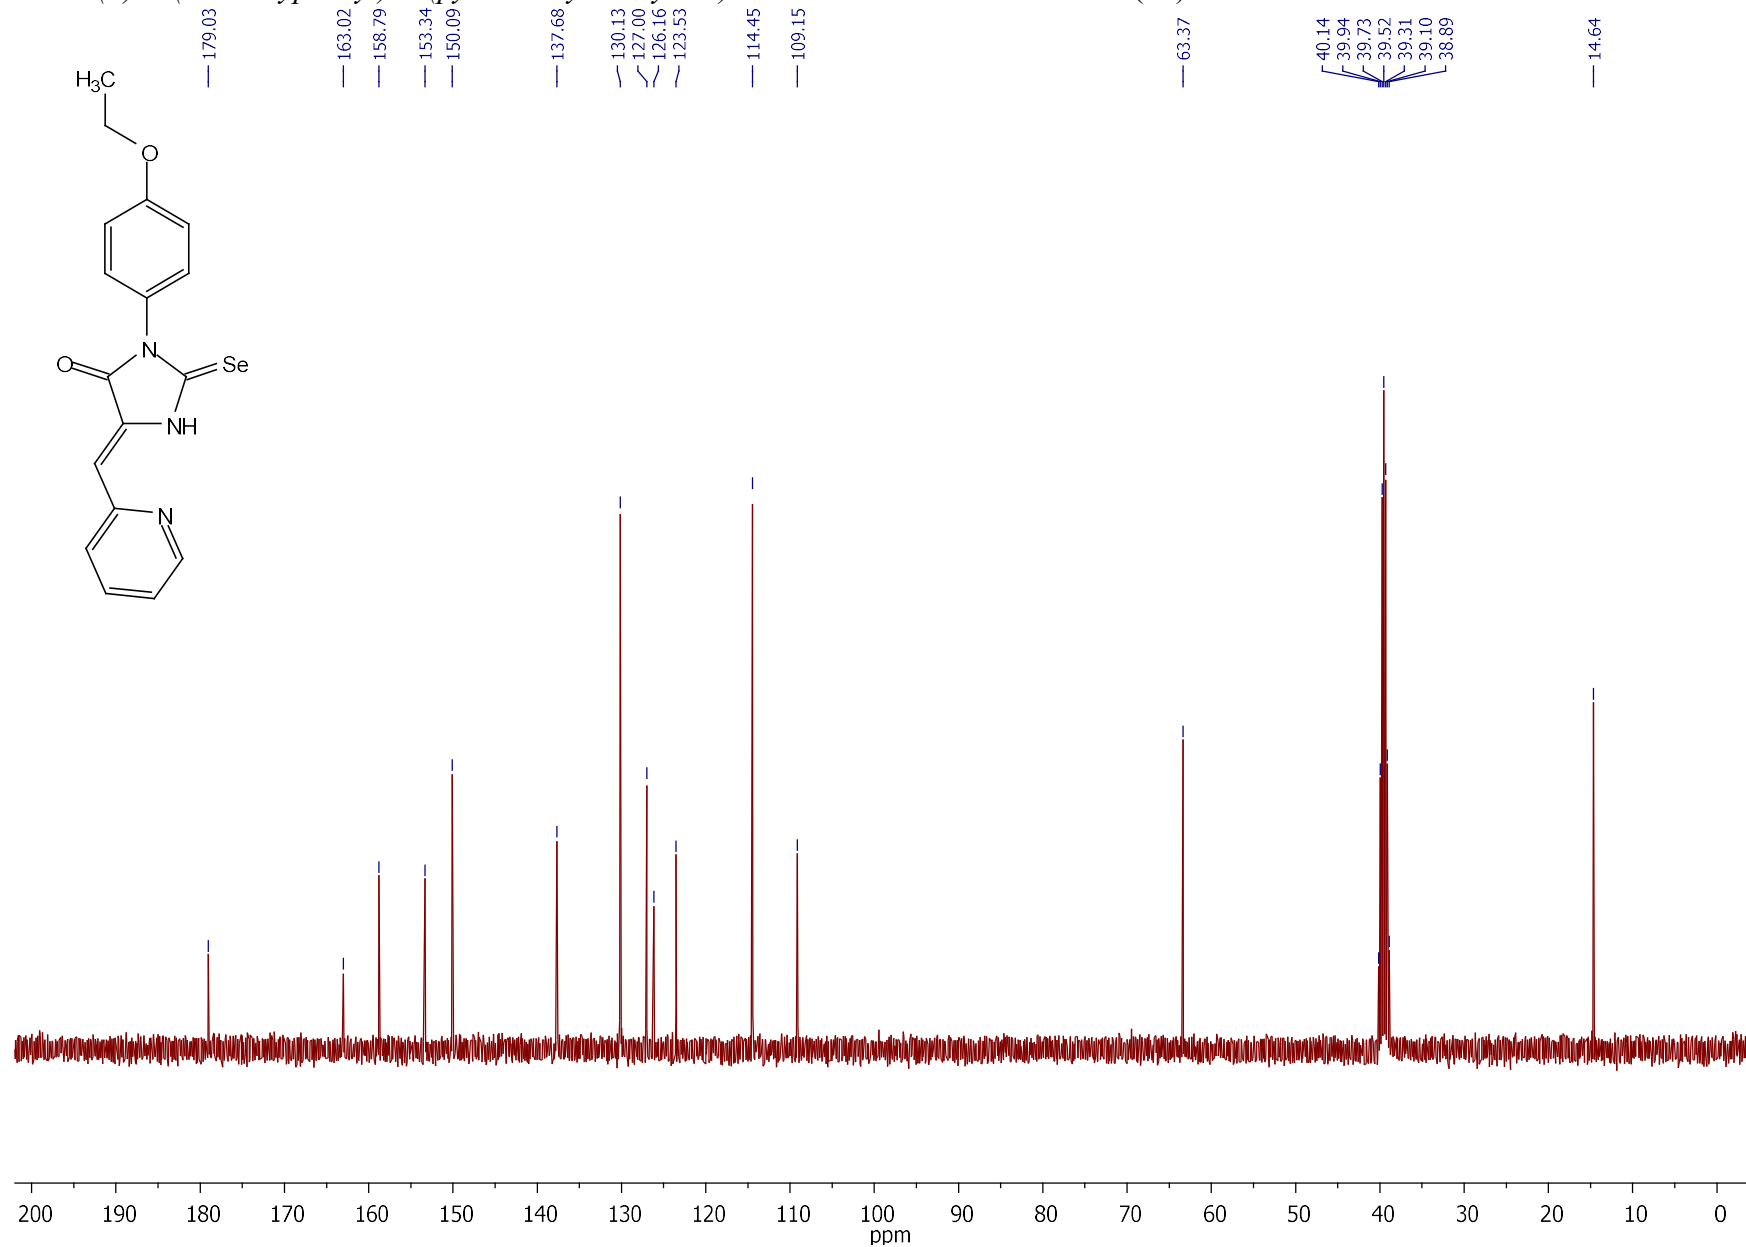

FTIR (Z)-3-(4-ethoxyphenyl)-5-(pyridin-2-ylmethylene)-2-selenoximidazolidin-4-one (3a)

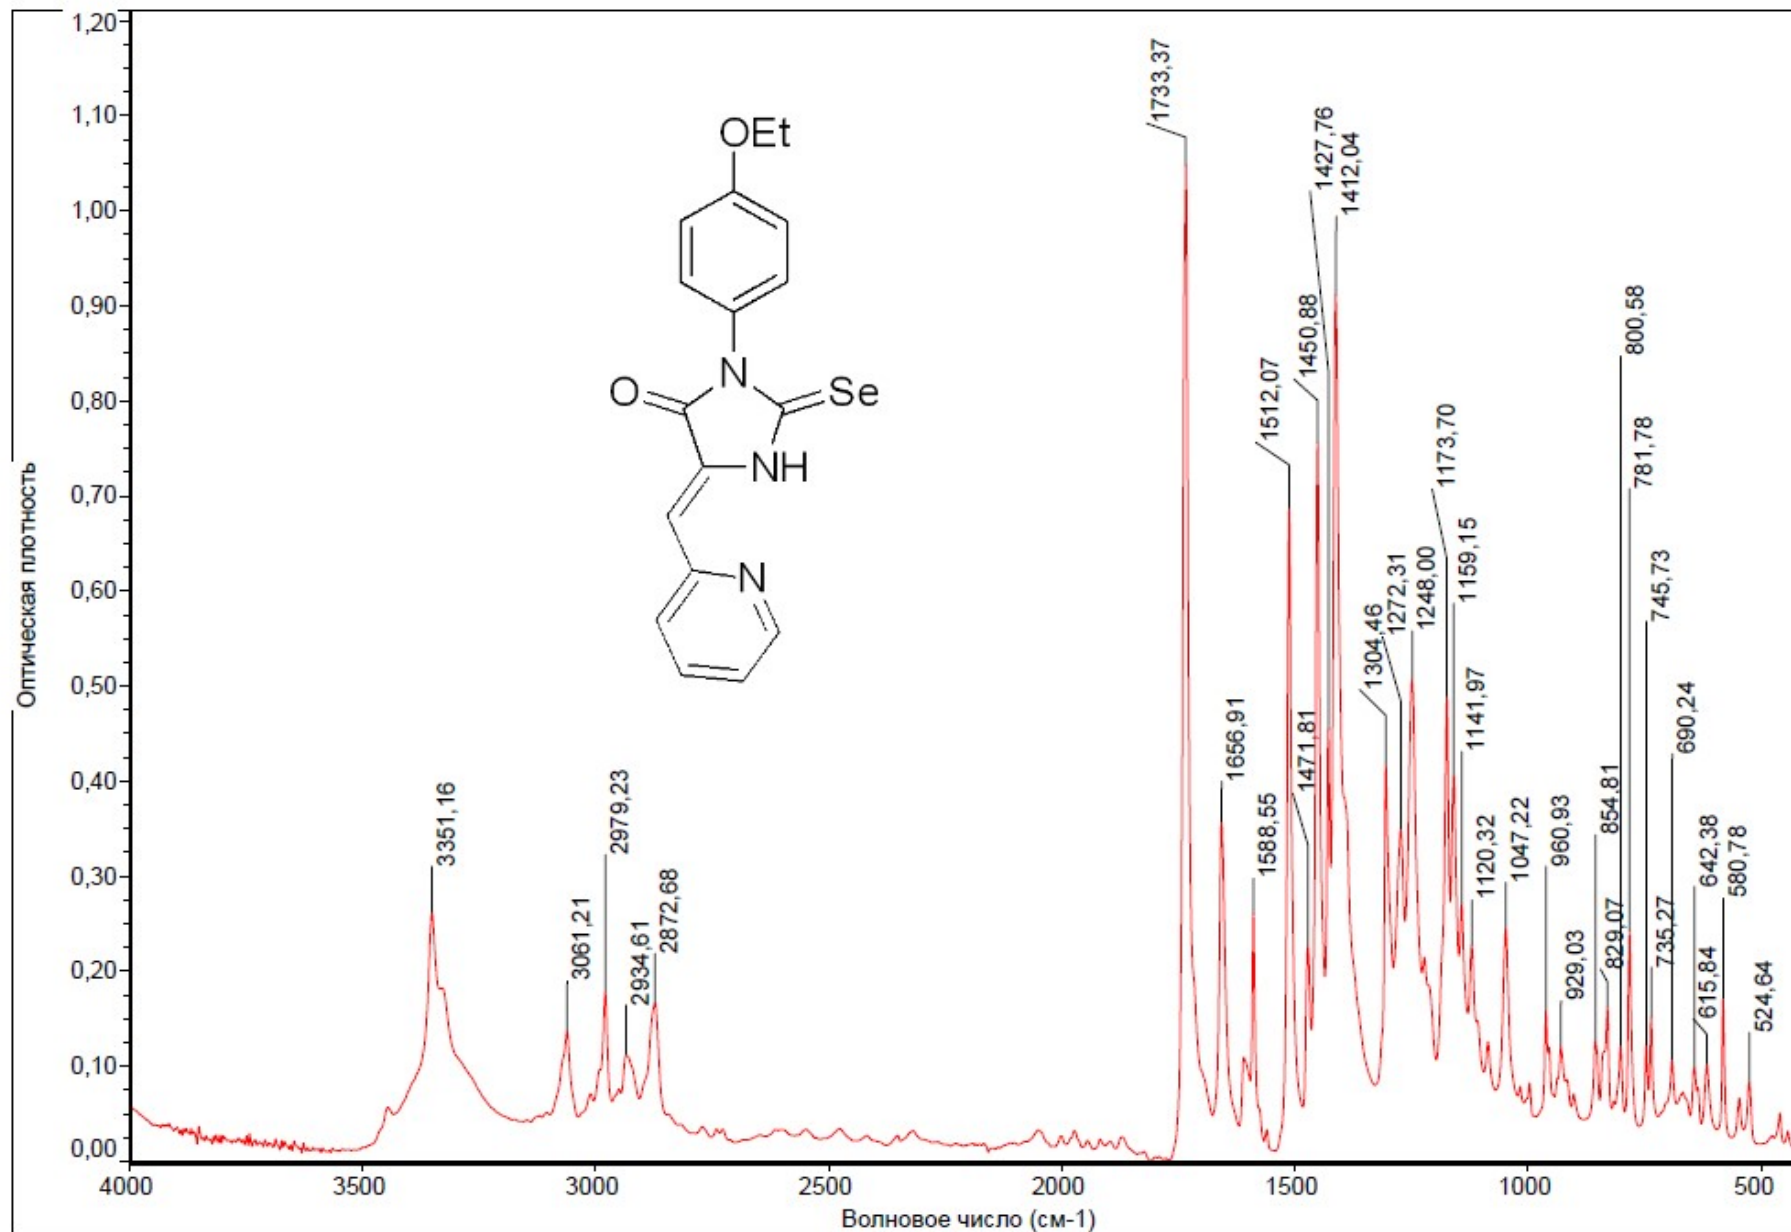

NMR  $^1\text{H}$  (Z)-4-(5-oxo-4-(pyridin-2-ylmethylene)-2-selenoximidazolidin-1-yl)benzonitrile (**3b**).

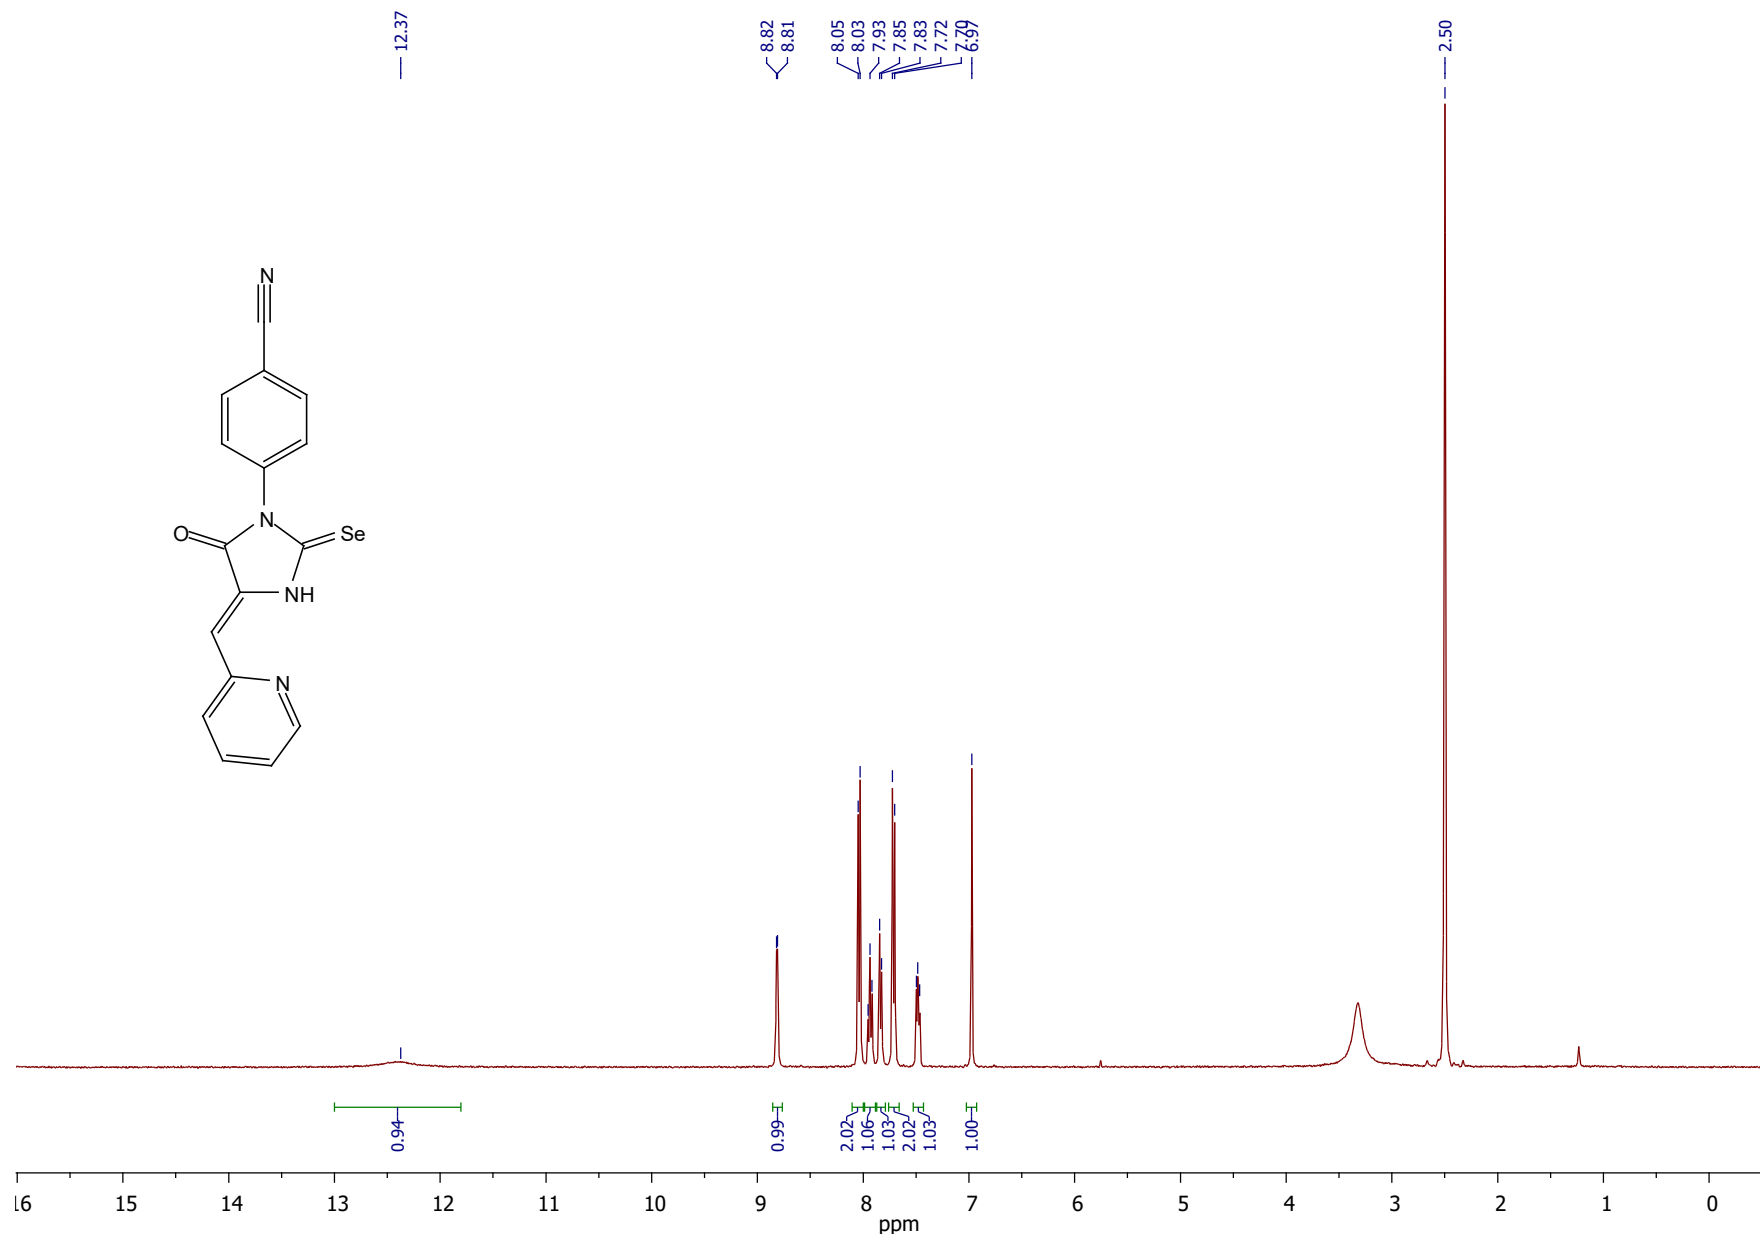

NMR  $^{13}\text{C}$  (Z)-4-(5-oxo-4-(pyridin-2-ylmethylene)-2-selenoxoimidazolidin-1-yl)benzonitrile (**3b**).

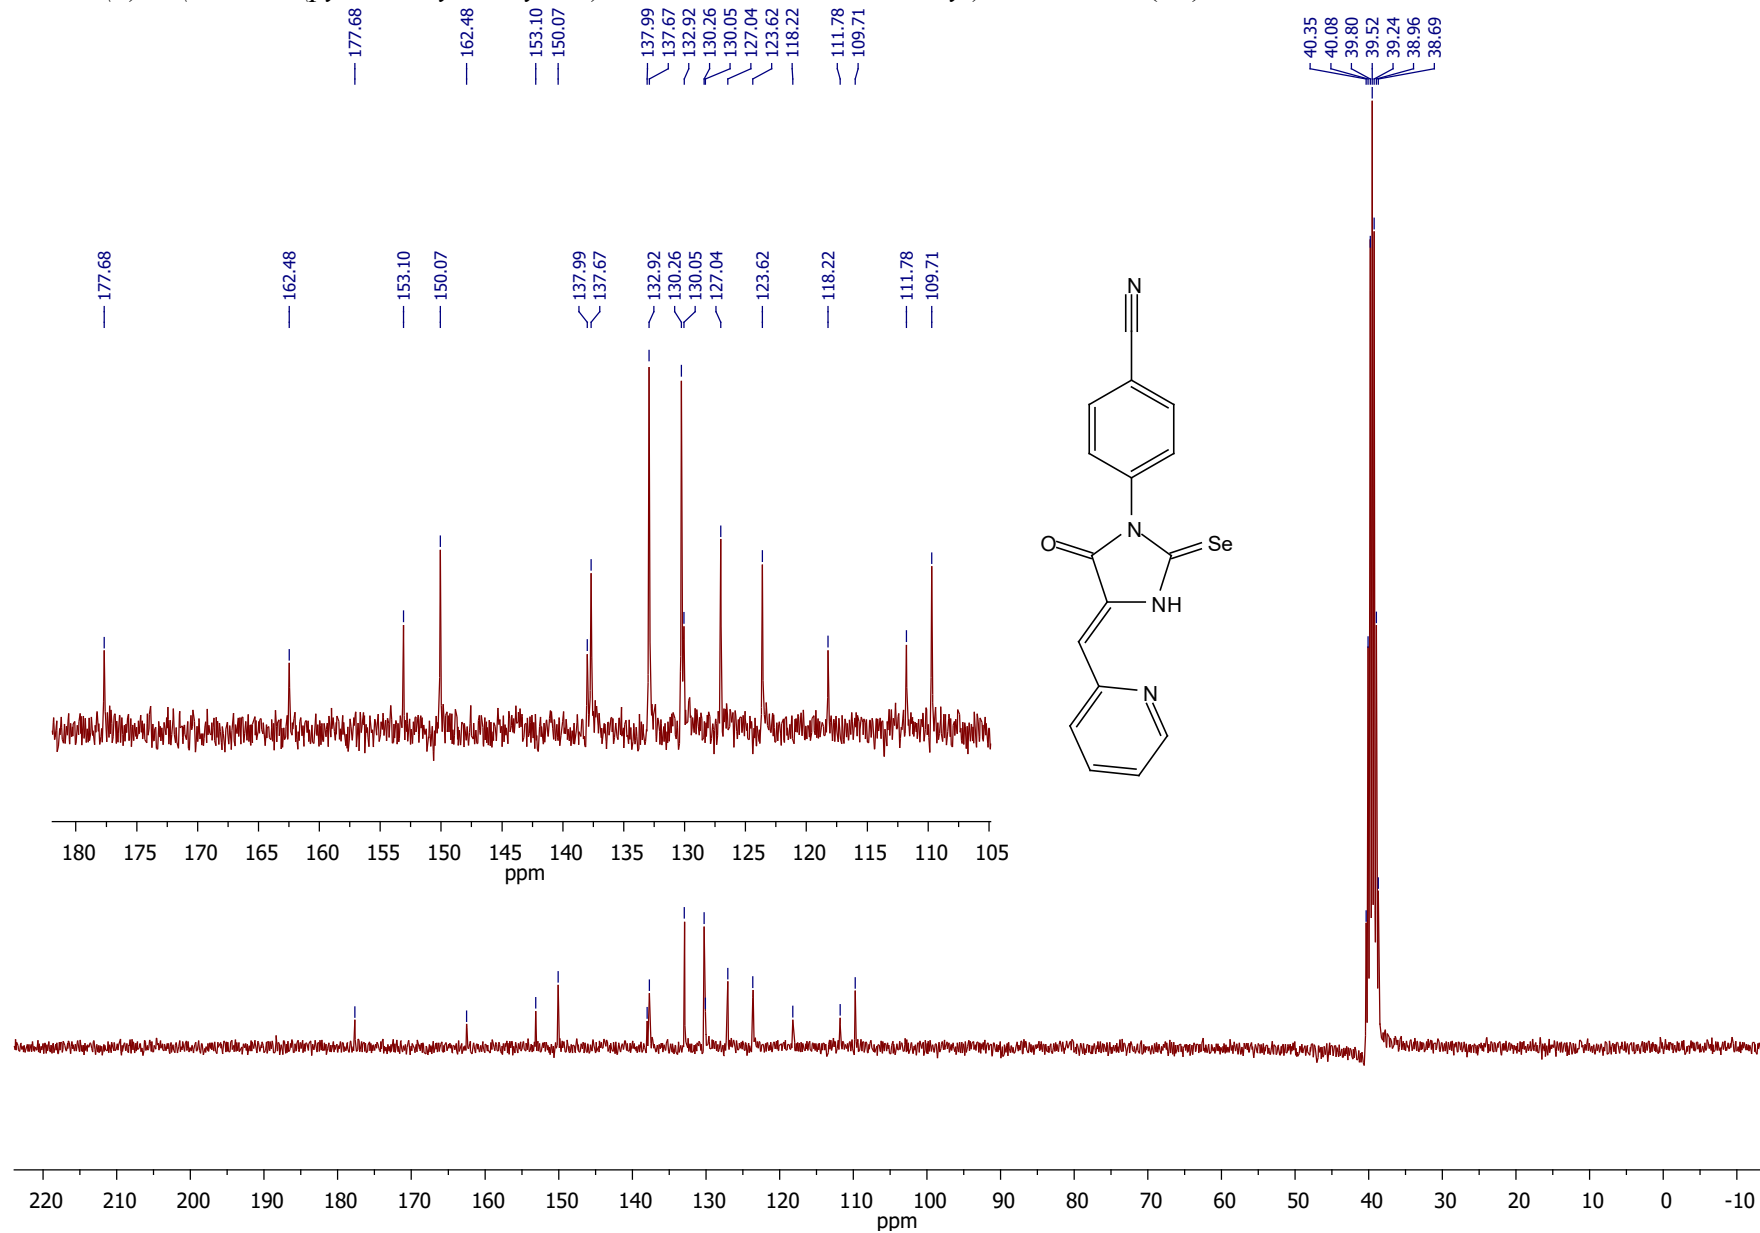

FTIR (Z)-4-(5-oxo-4-(pyridin-2-ylmethylene)-2-selenoxoimidazolidin-1-yl)benzonitrile (**3b**).

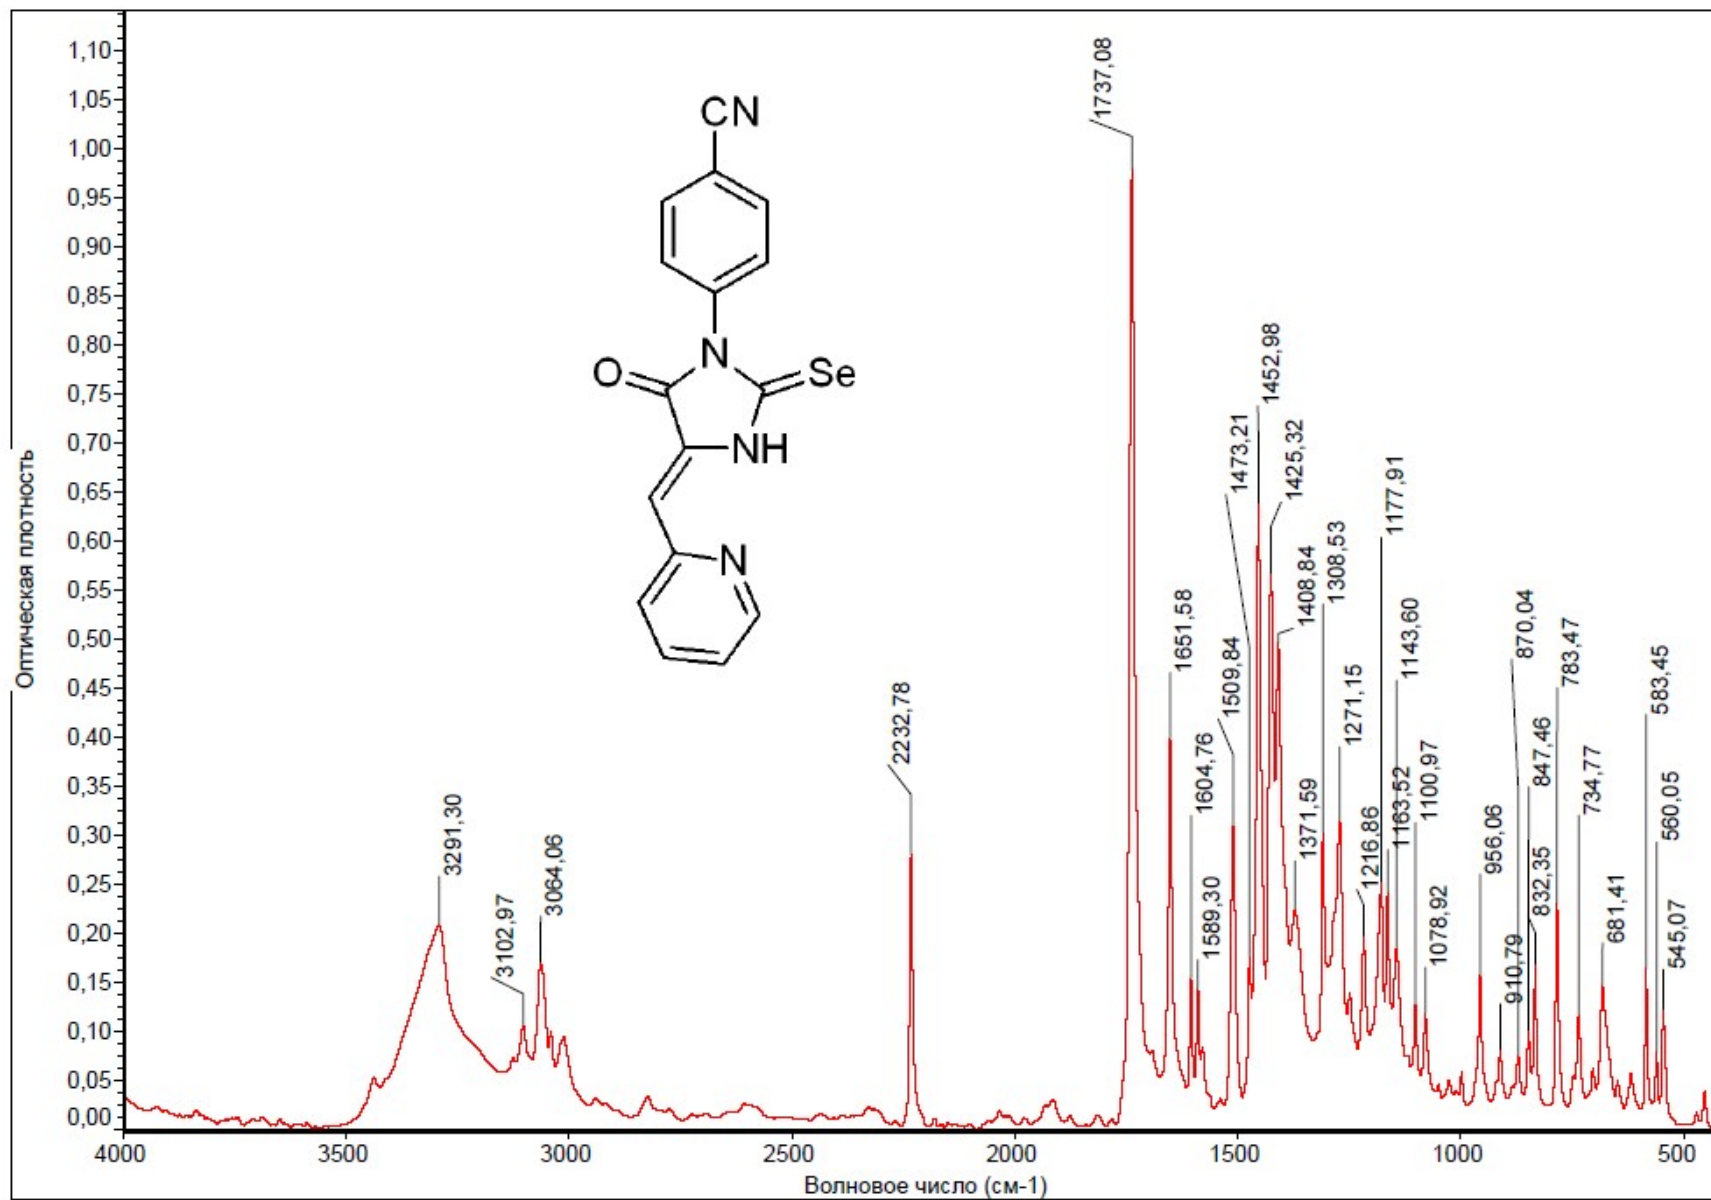

NMR  $^1\text{H}$  (Z)-3-(4-chlorophenyl)-5-(pyridin-2-ylmethylene)-2-selenoximidazolidin-4-one (**3c**).

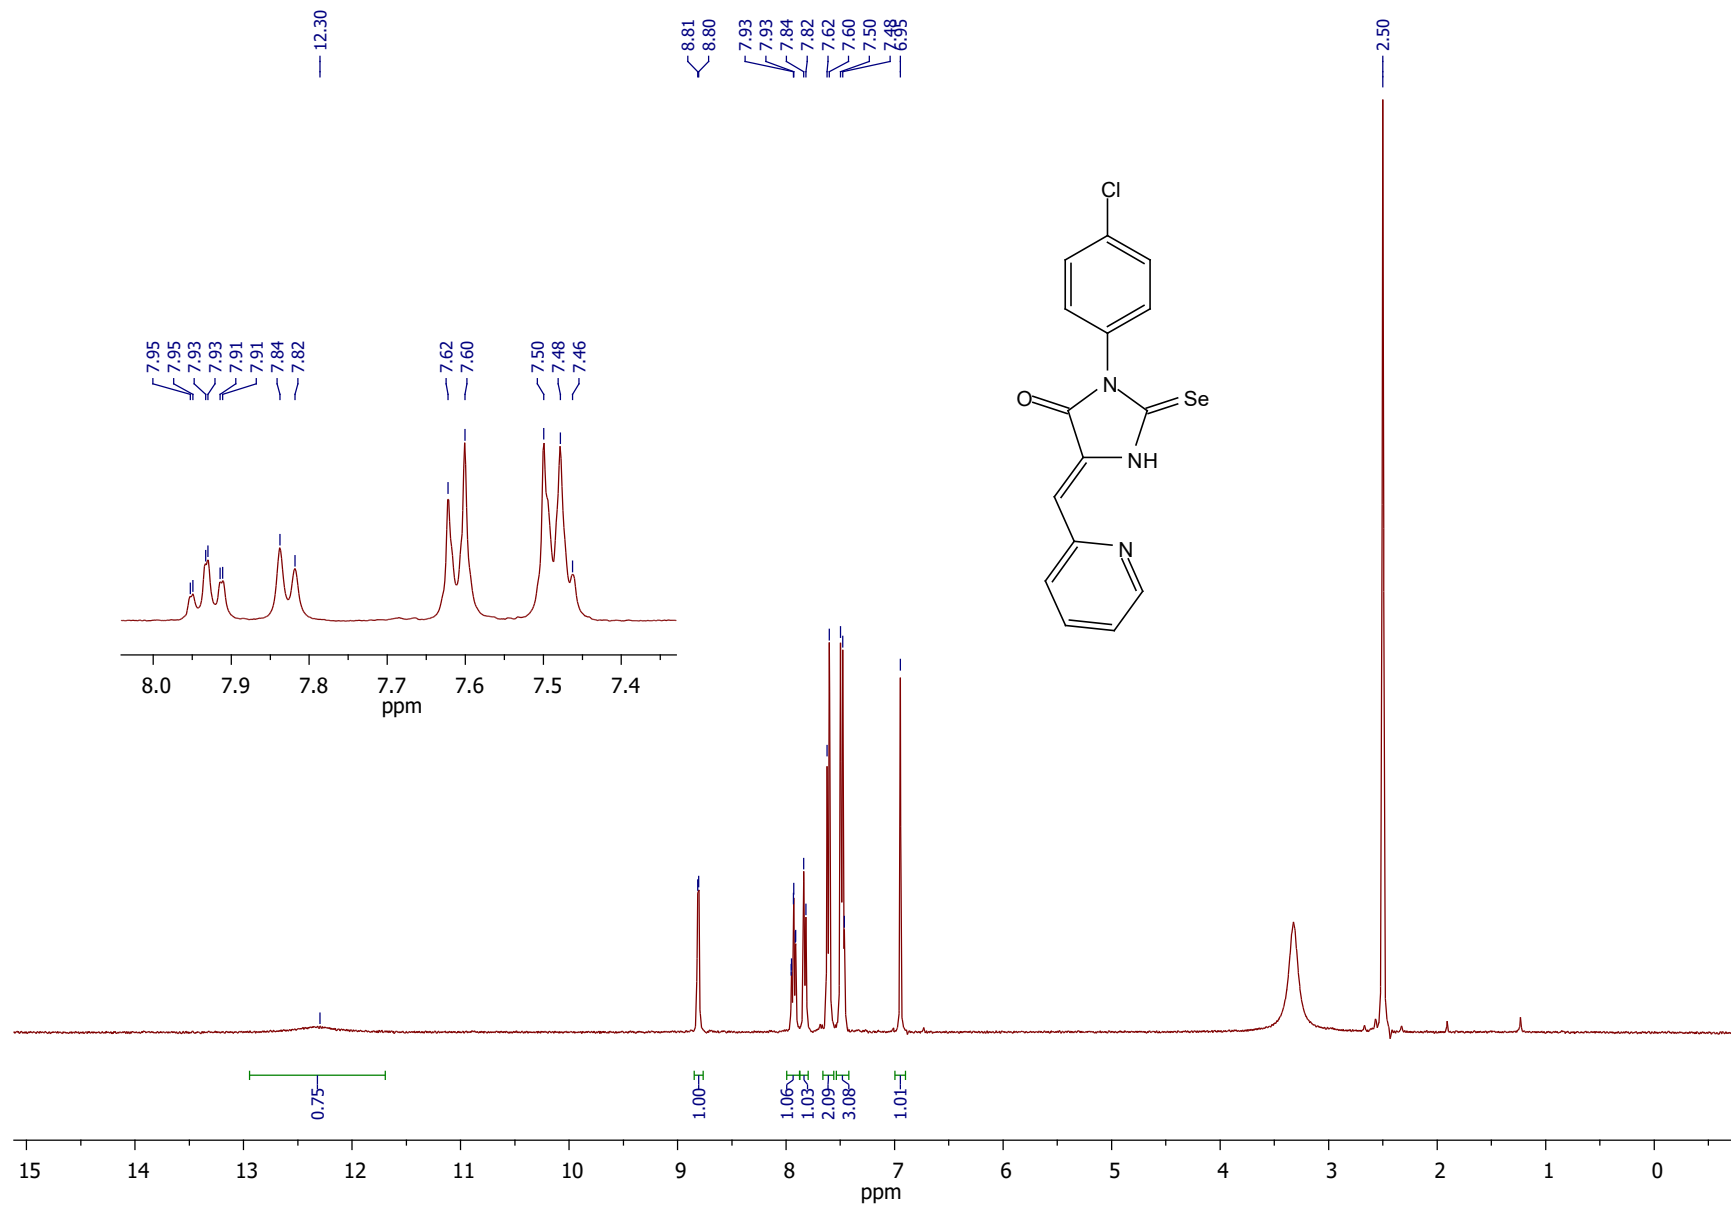



NMR  $^{13}\text{C}$  (Z)-3-(4-chlorophenyl)-5-(pyridin-2-ylmethylene)-2-selenoximidazolidin-4-one (**3e**).

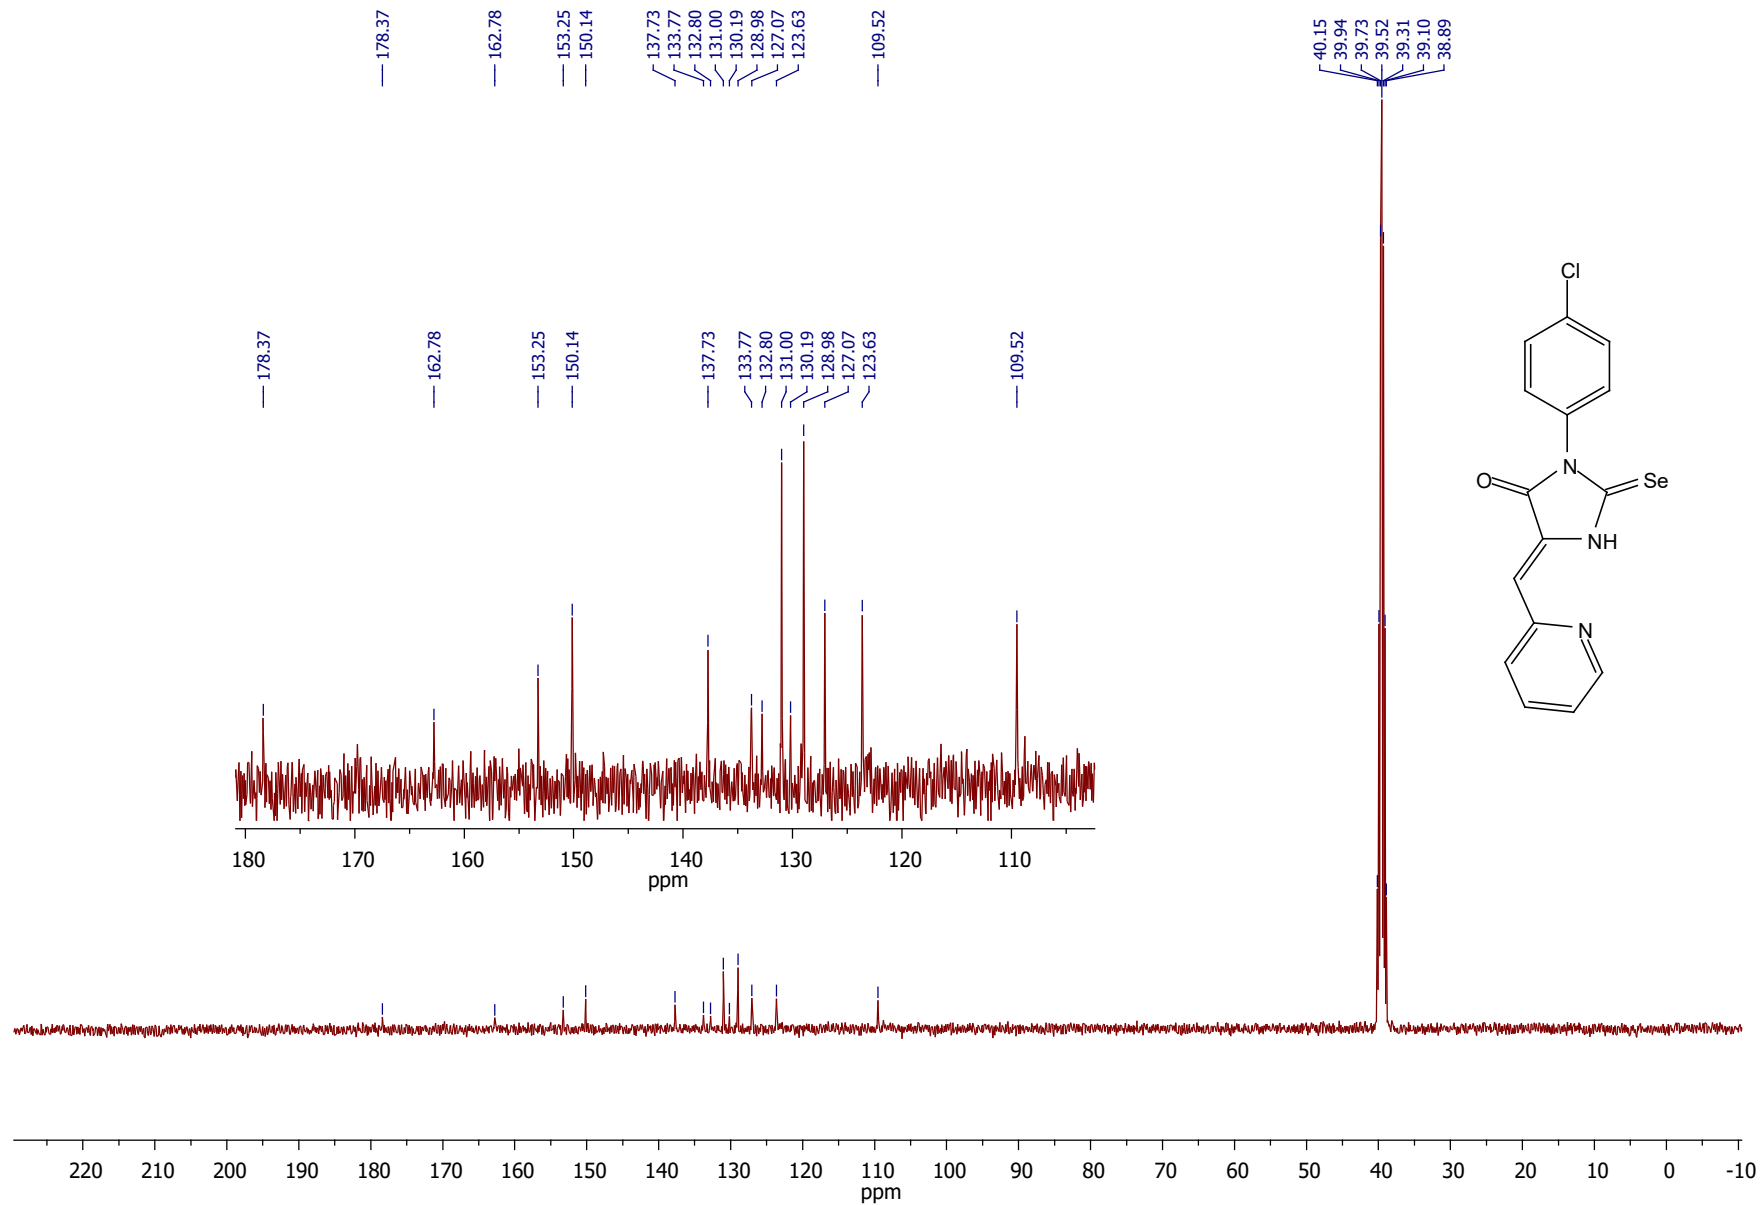

FTIR (Z)-3-(4-chlorophenyl)-5-(pyridin-2-ylmethylene)-2-selenoximidazolidin-4-one (3c).

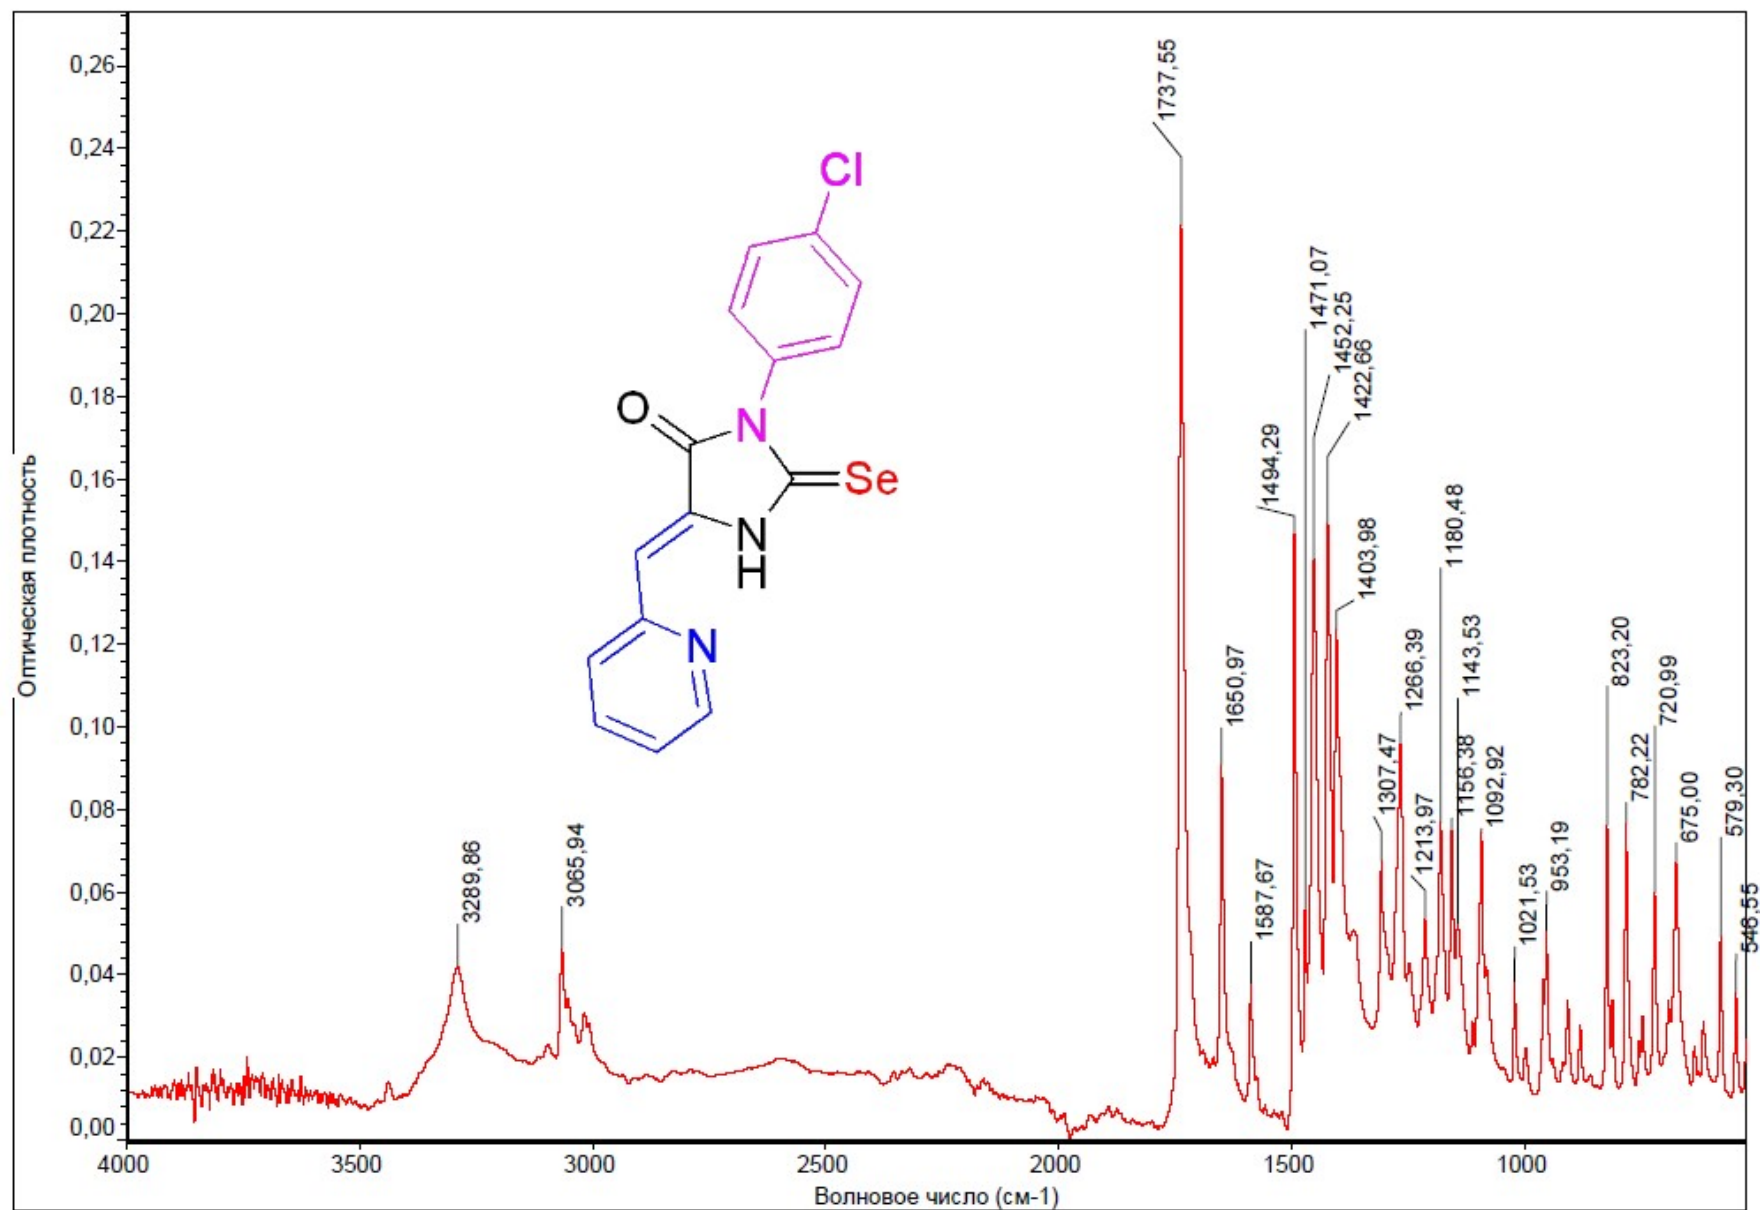

NMR  $^1\text{H}$  (4Z,4'Z)-2,2'-(ethane-1,2-diylbis(selanediyl))bis(1-(4-ethoxyphenyl)-4-(pyridin-2-ylmethylene)-1H-imidazol-5(4H)-one) (**4a**).

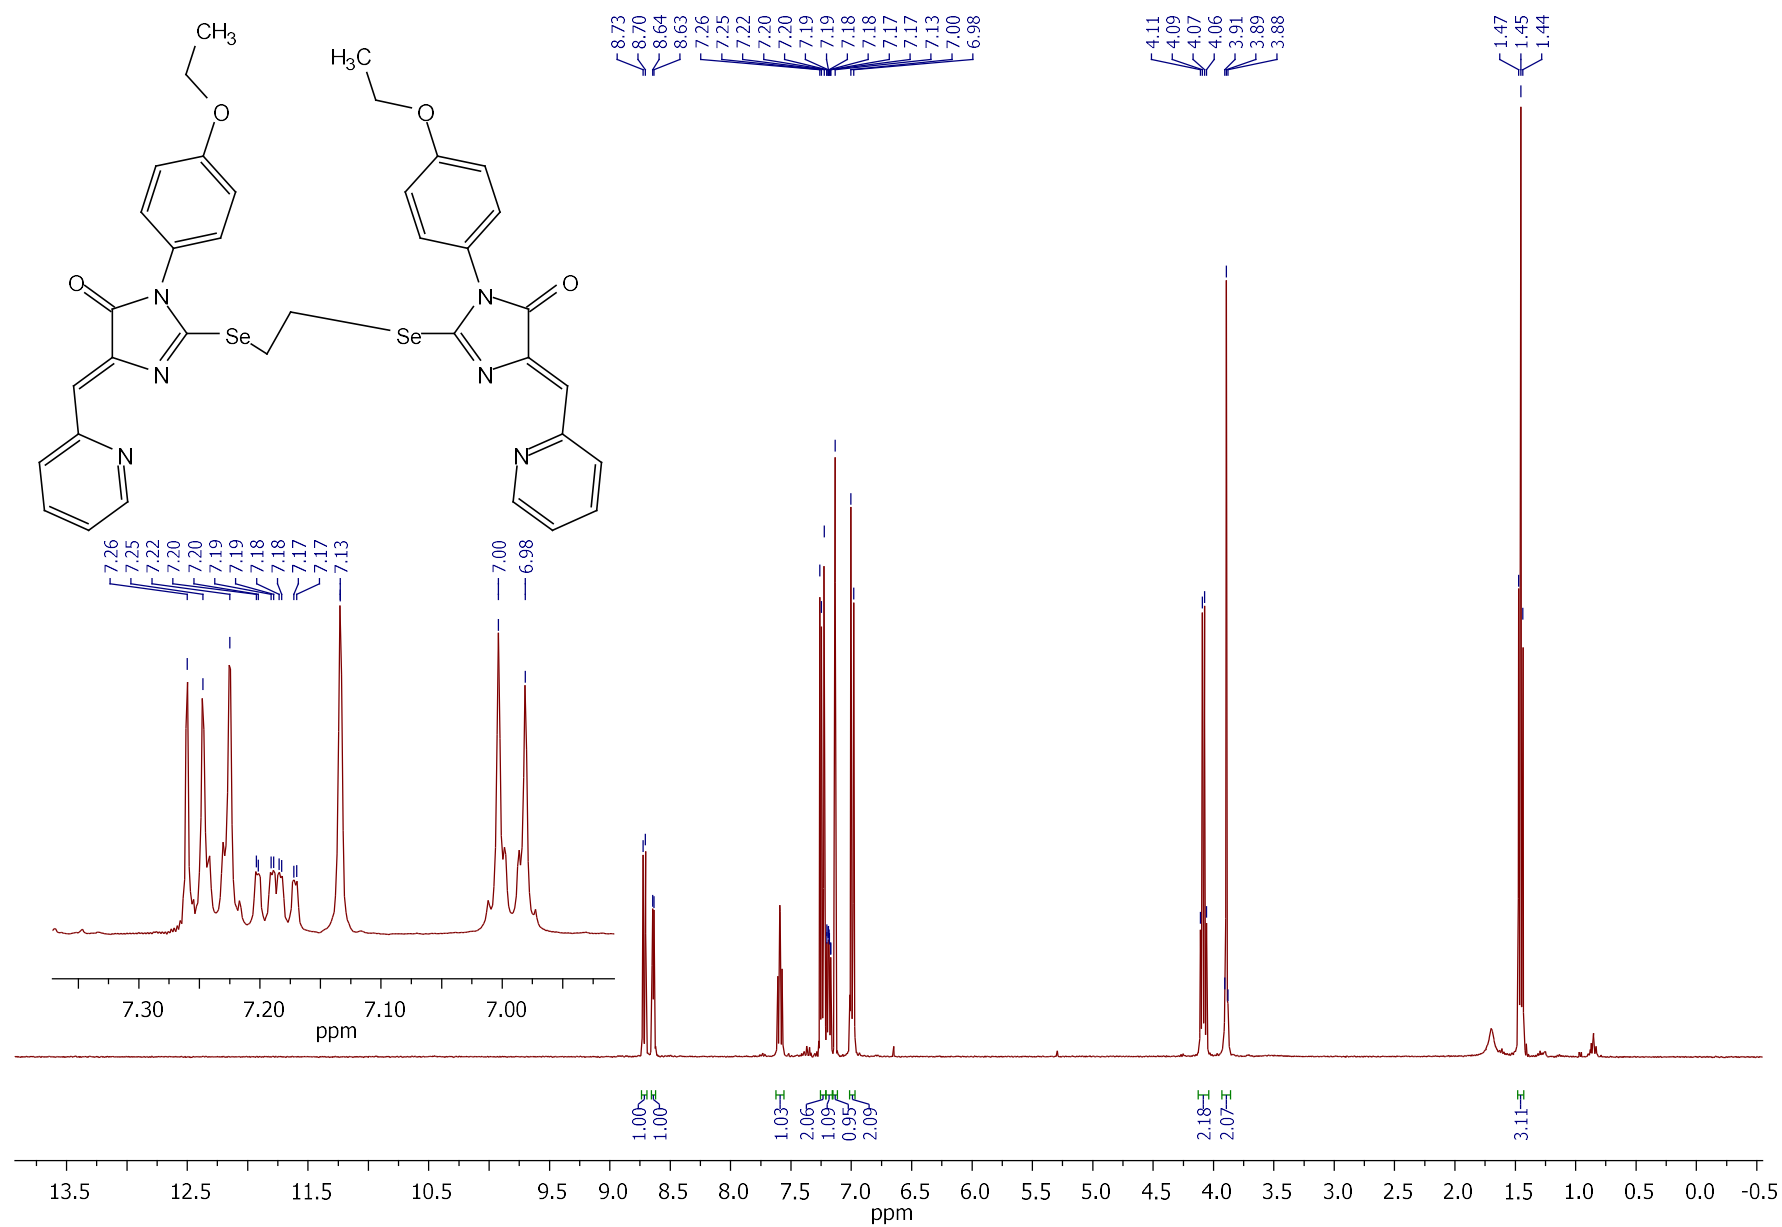

NMR  $^{13}\text{C}$  (4Z,4'Z)-2,2'-(ethane-1,2-diylbis(selanediyl))bis(1-(4-ethoxyphenyl)-4-(pyridin-2-ylmethylene)-1H-imidazol-5(4H)-one) (**4a**).

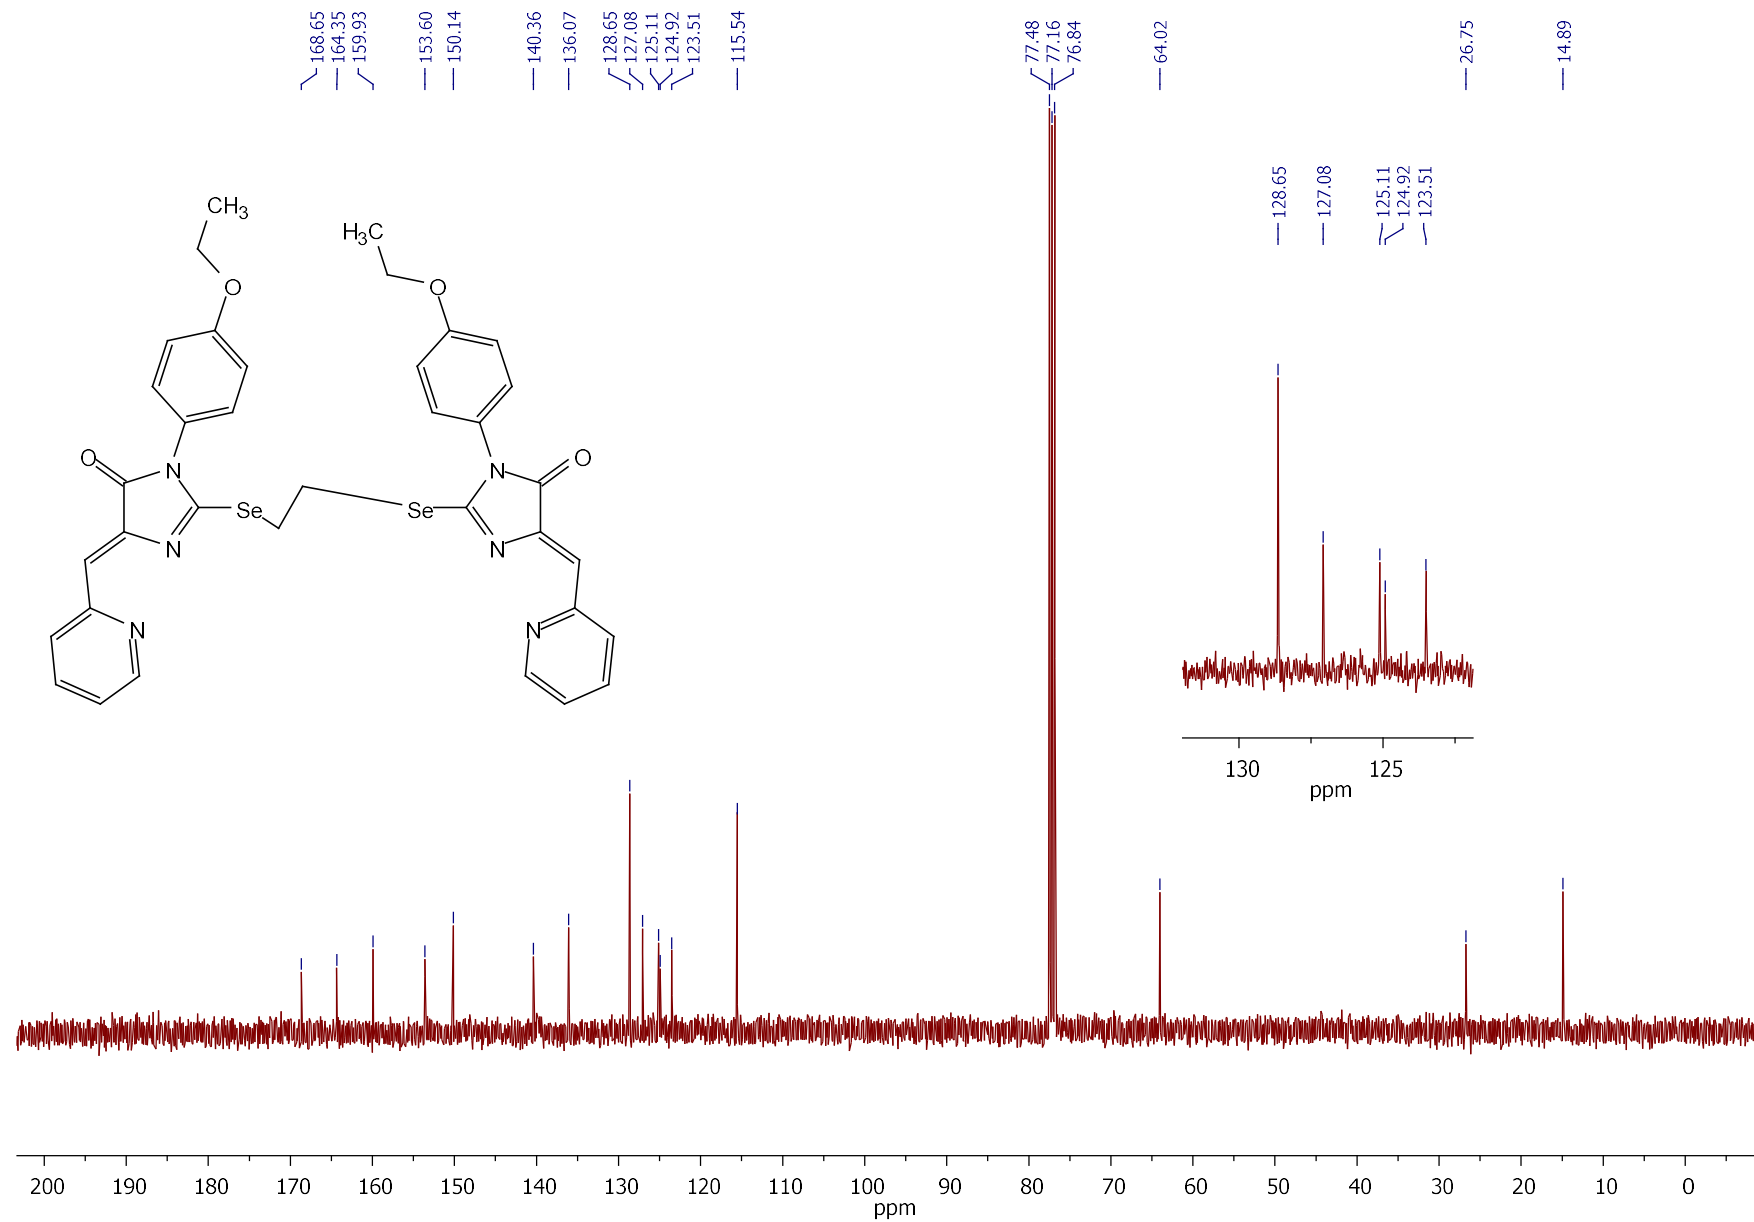

FTIR (4Z,4'Z)-2,2'-(ethane-1,2-diylbis(selanediyl))bis(1-(4-ethoxyphenyl)-4-(pyridin-2-ylmethylene)-1H-imidazol-5(4H)-one) (4a).

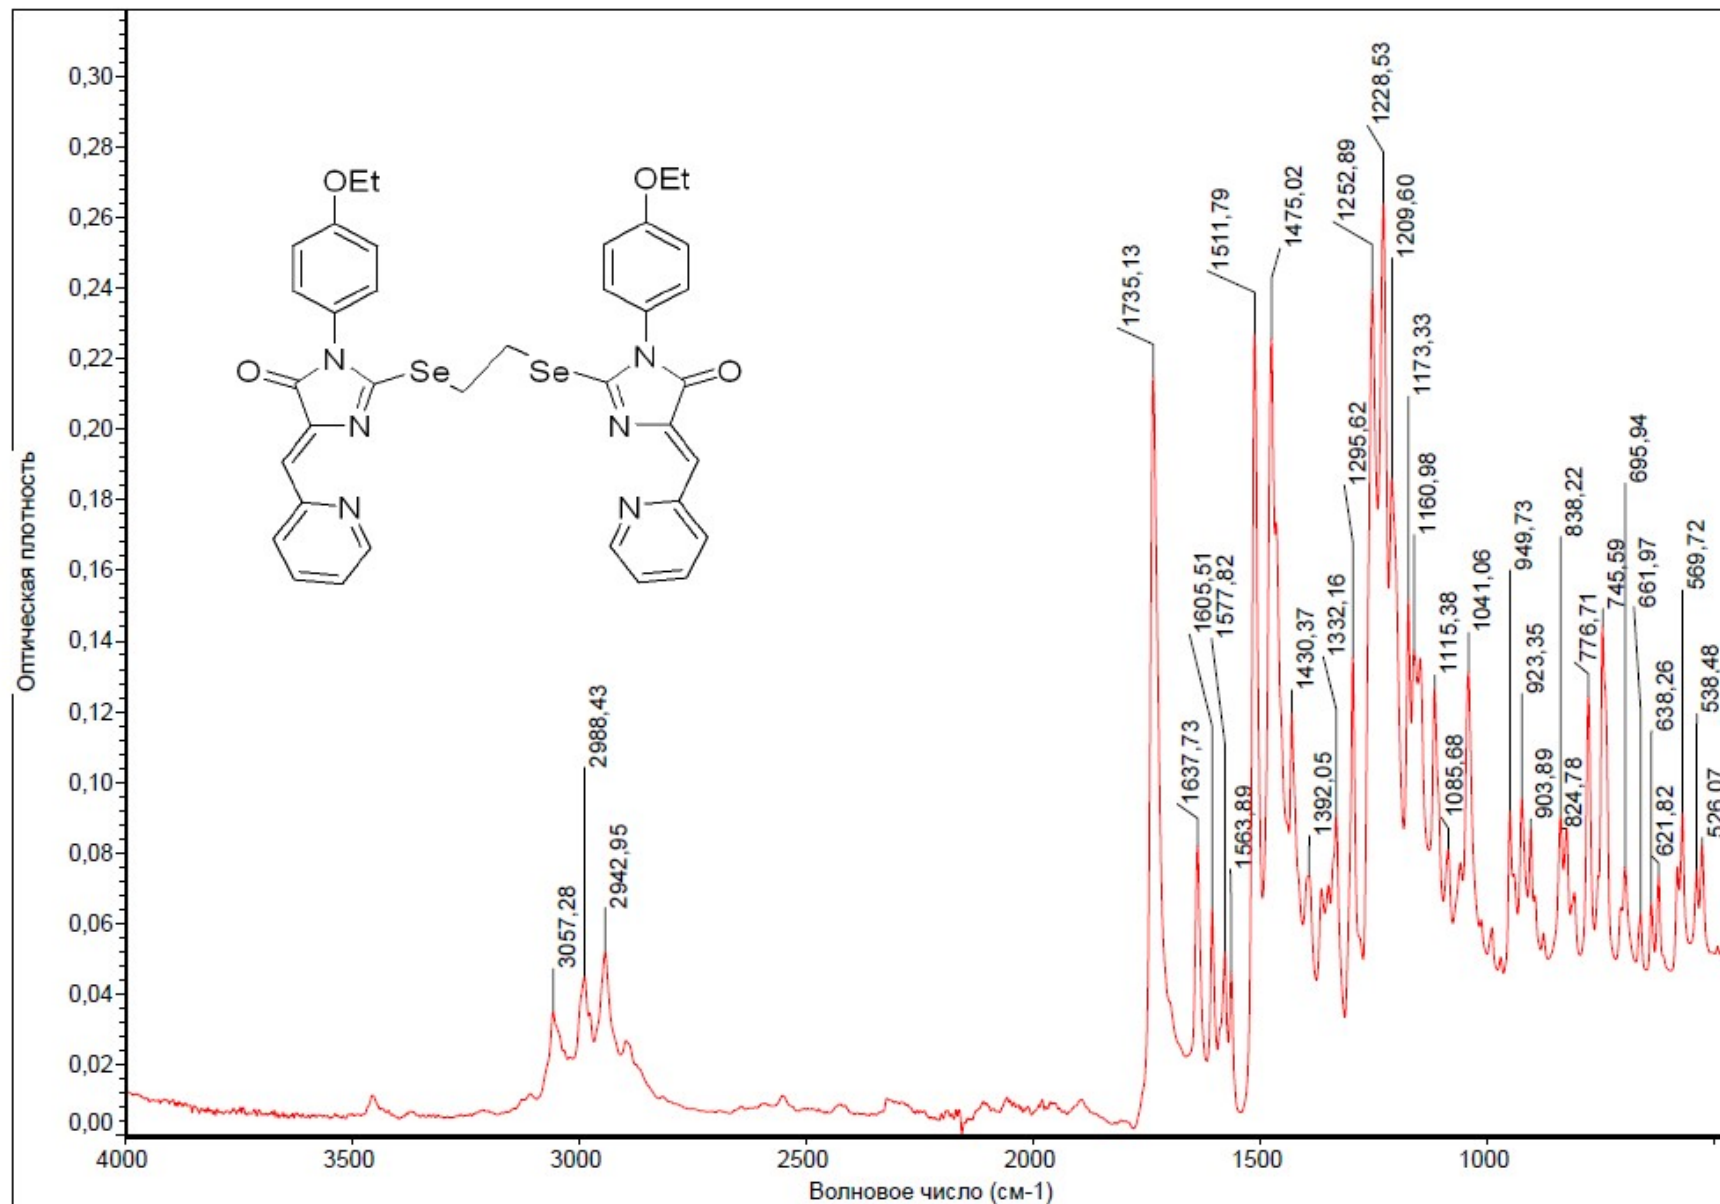

NMR  $^1\text{H}$  4,4'-((4Z,4'Z)-2,2'-(ethane-1,2-diylbis(selanediyl))bis(5-oxo-4-(pyridin-2-ylmethylene)-4,5-dihydro-1H-imidazole-2,1-diyl))dibenzonitrile (**4b**).

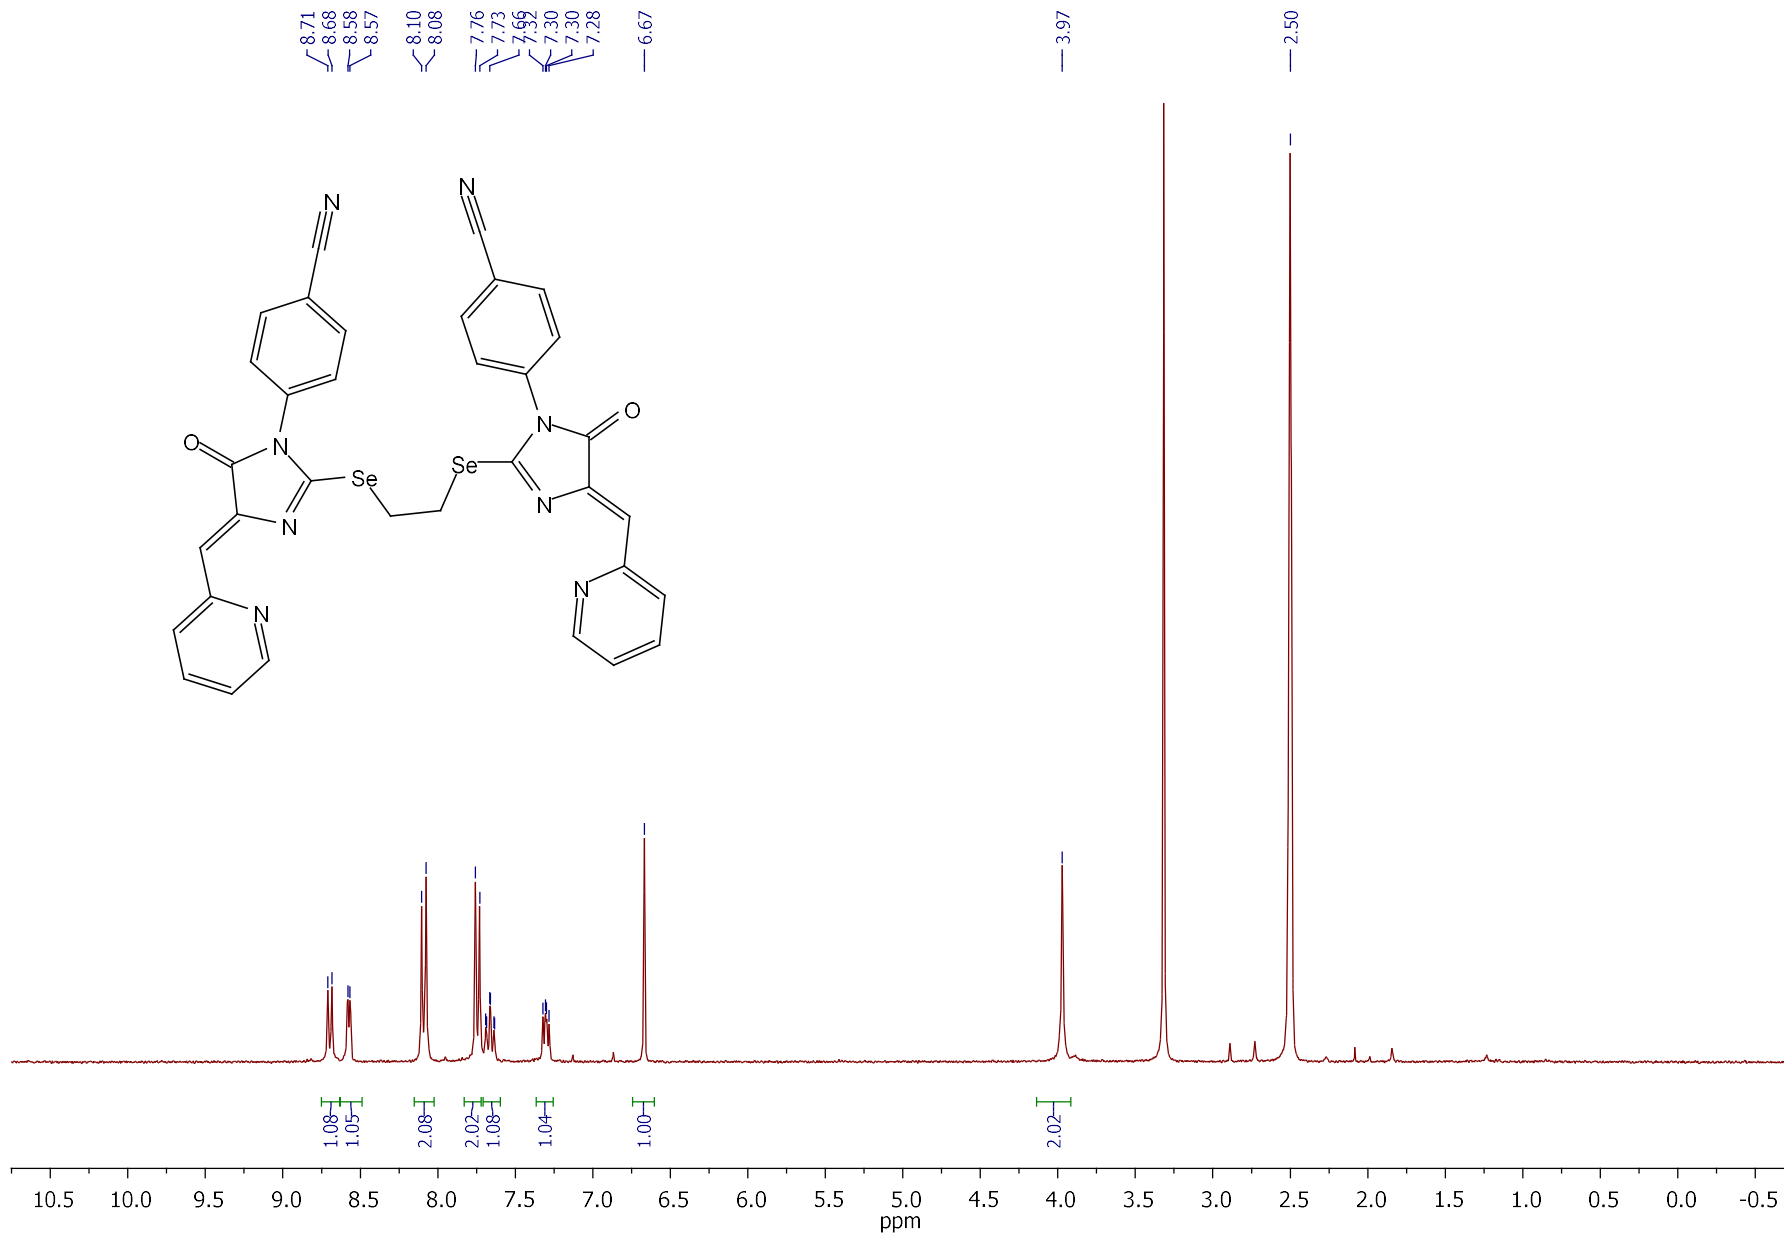

NMR  $^{13}\text{C}$  4,4'-((4Z,4'Z)-2,2'-(ethane-1,2-diylbis(selanediyl))bis(5-oxo-4-(pyridin-2-ylmethylene)-4,5-dihydro-1H-imidazole-2,1-diyl)dibenzonitrile (**4b**).

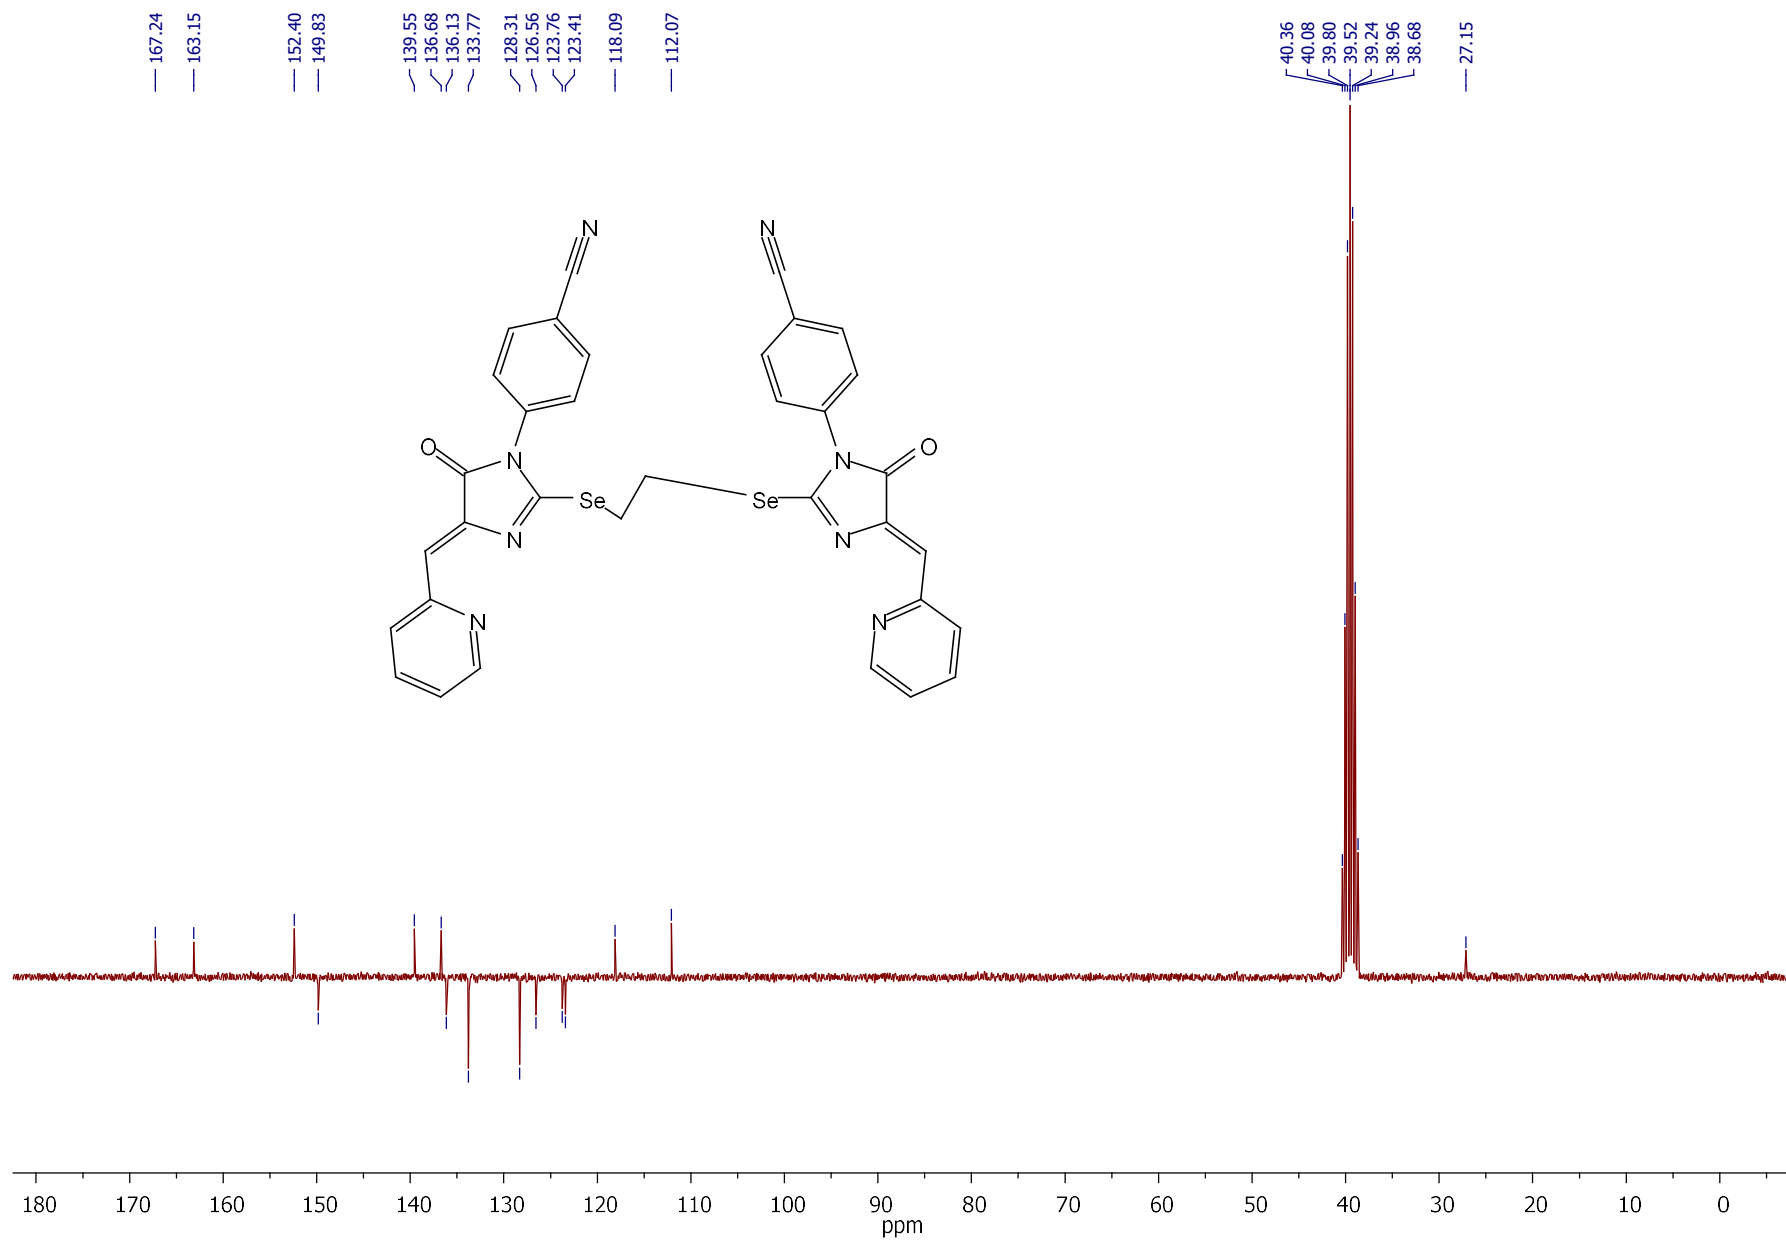

FTIR 4,4'-((4Z,4'Z)-2,2'-(ethane-1,2-diylbis(selanediyl))bis(5-oxo-4-(pyridin-2-ylmethylene)-4,5-dihydro-1H-imidazole-2,1-diyl))dibenzonitrile (**4b**).

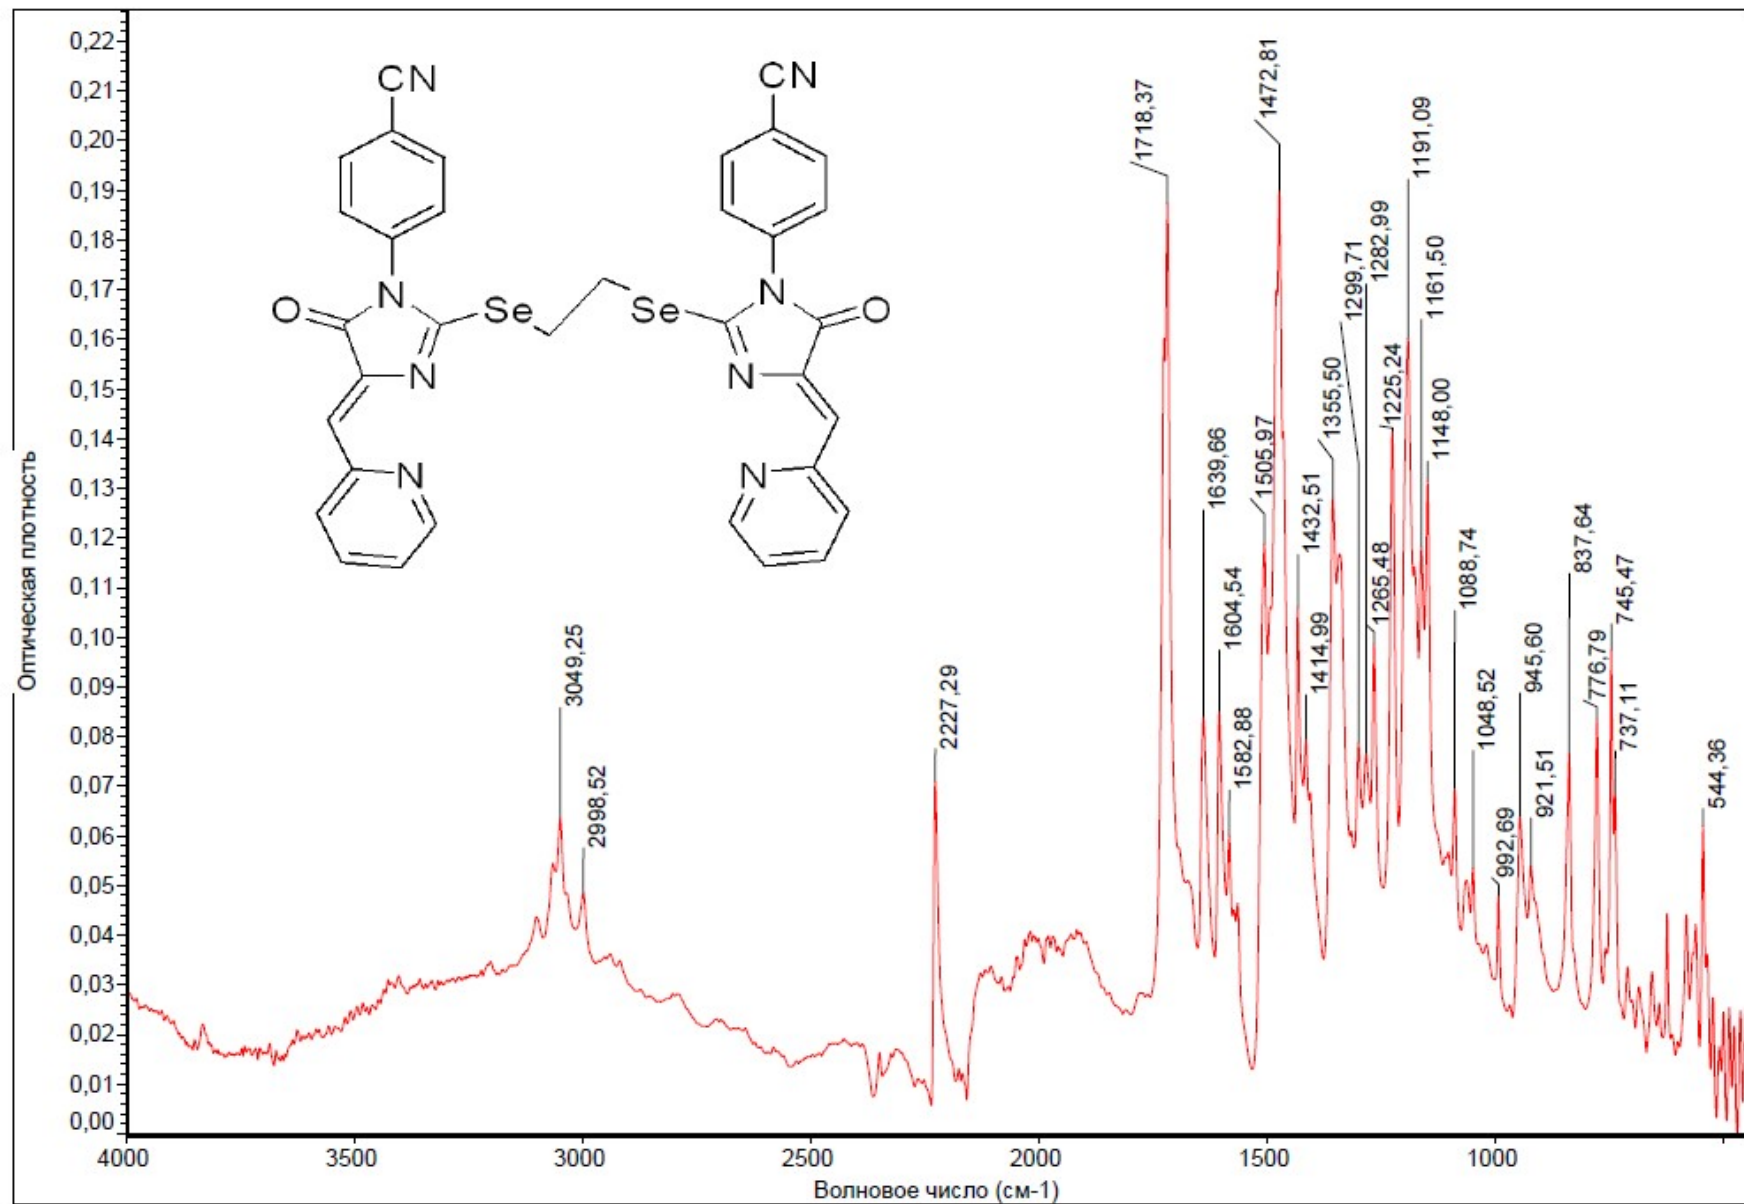



NMR  $^1\text{H}$  (4Z,4'Z)-2,2'-(ethane-1,2-diylbis(selenediyl))bis(1-(4-chlorophenyl)-4-(pyridin-2-ylmethylene)-1H-imidazol-5(4H)-one) (**4c**).

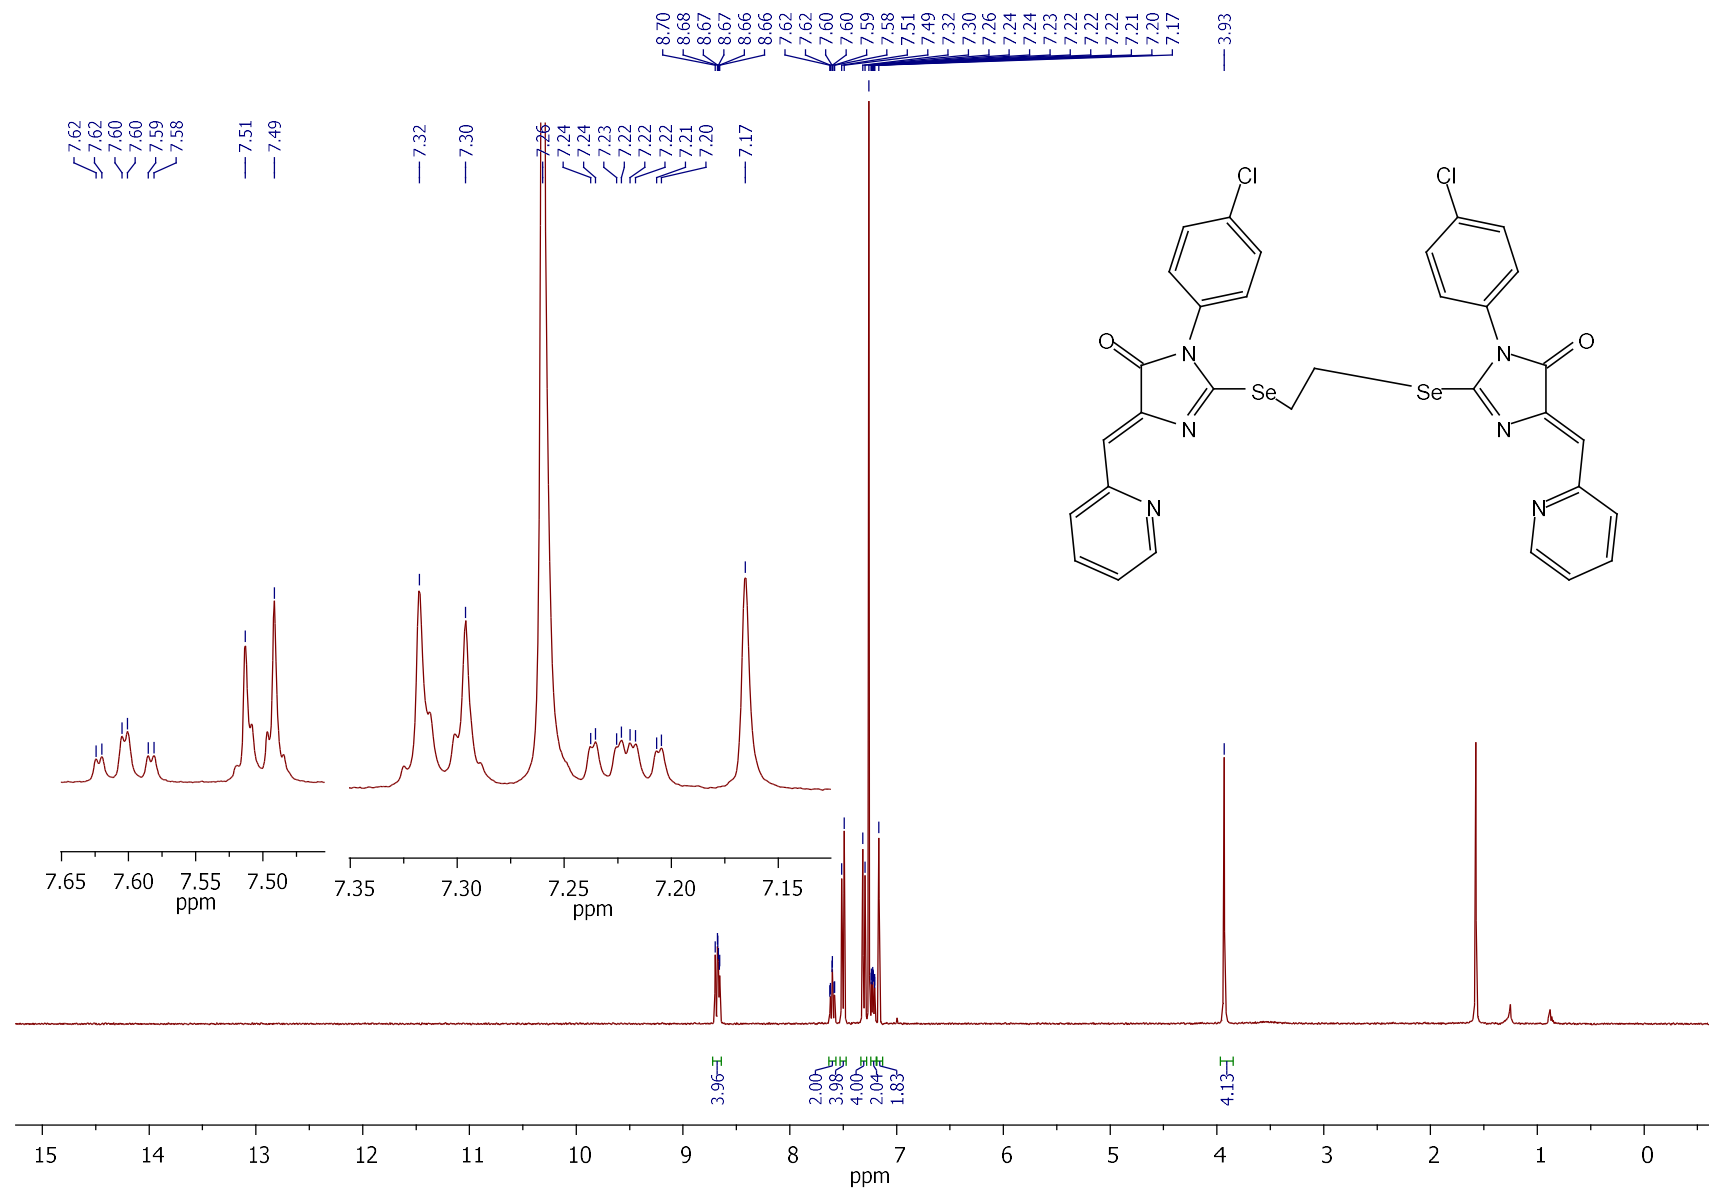

NMR  $^{13}\text{C}$  (4Z,4'Z)-2,2'-(ethane-1,2-diylbis(selenediyl))bis(1-(4-chlorophenyl)-4-(pyridin-2-ylmethylene)-1H-imidazol-5(4H)-one) (**4c**).

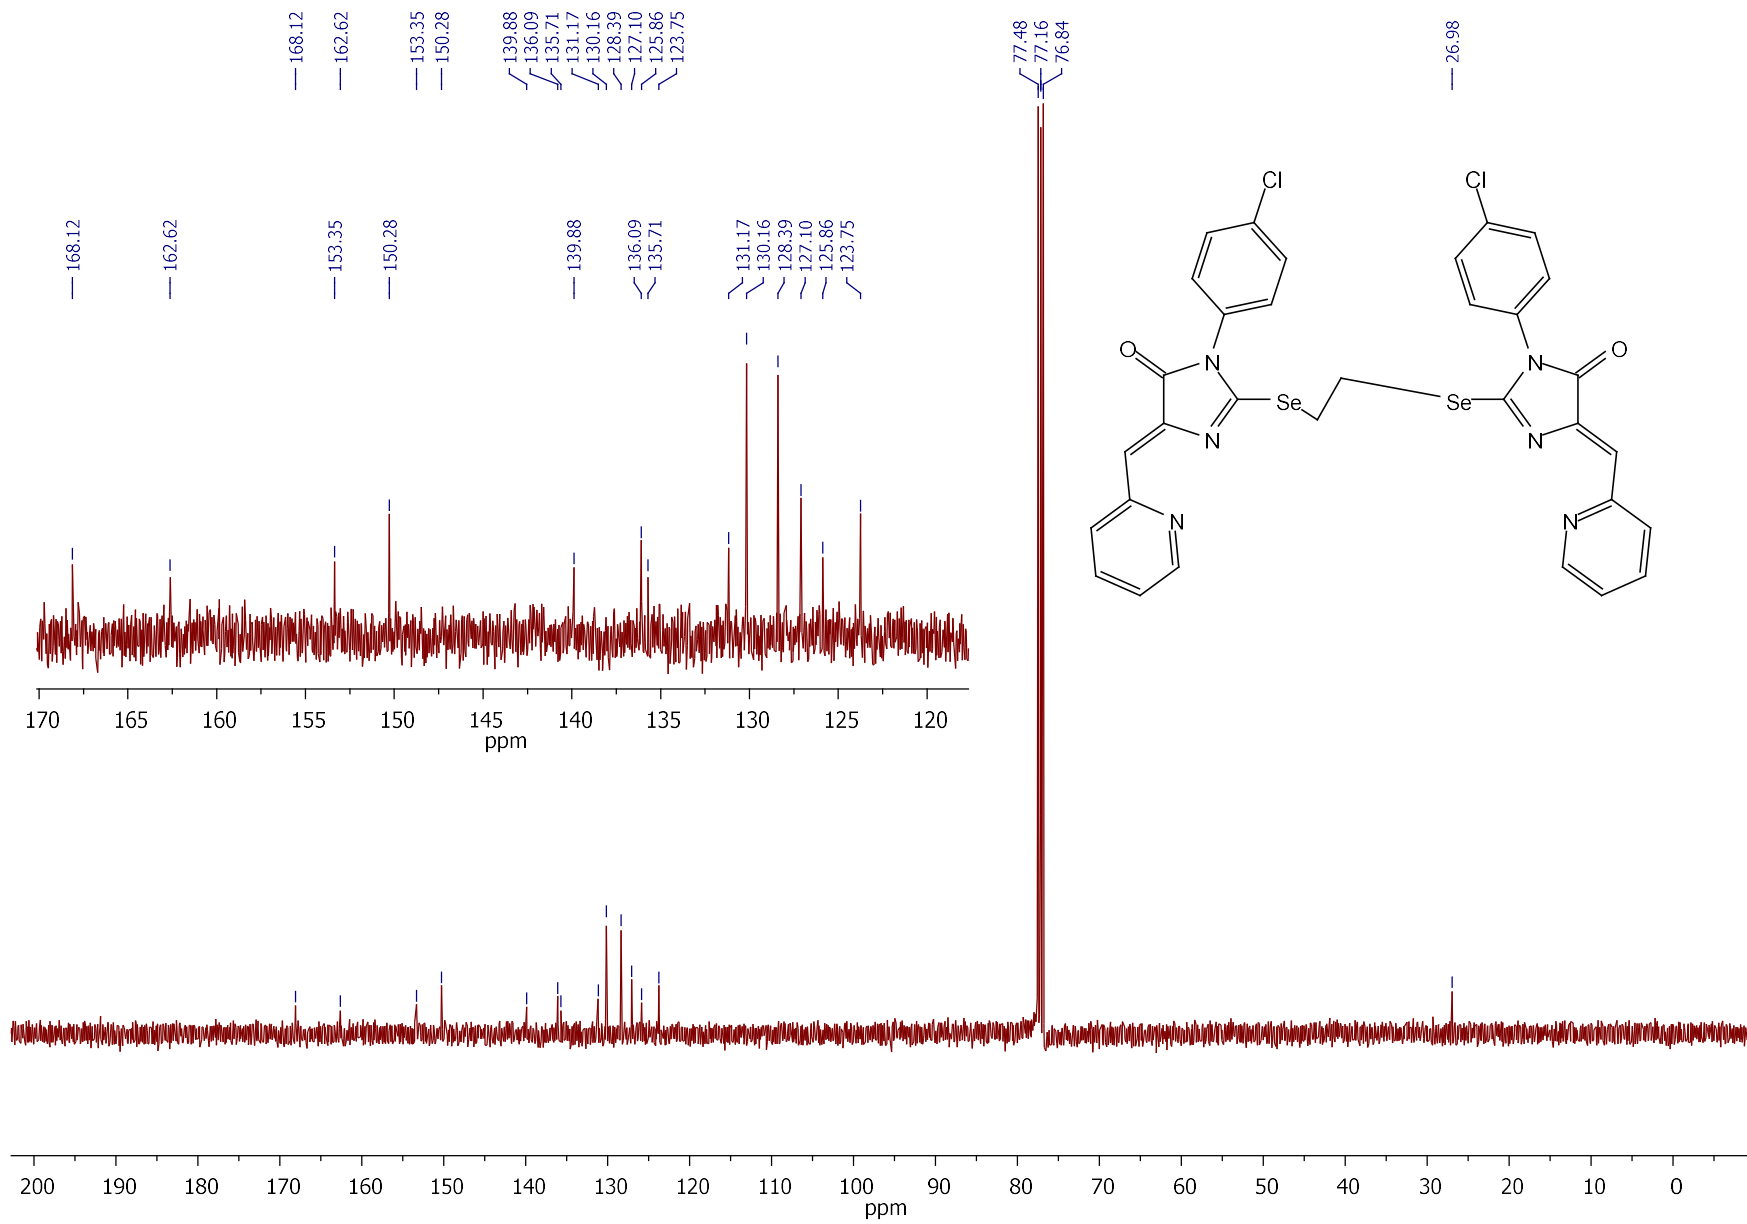

FTIR (4Z,4'Z)-2,2'-(ethane-1,2-diylbis(selenediyl))bis(1-(4-chlorophenyl)-4-(pyridin-2-ylmethylene)-1H-imidazol-5(4H)-one) (**4c**).

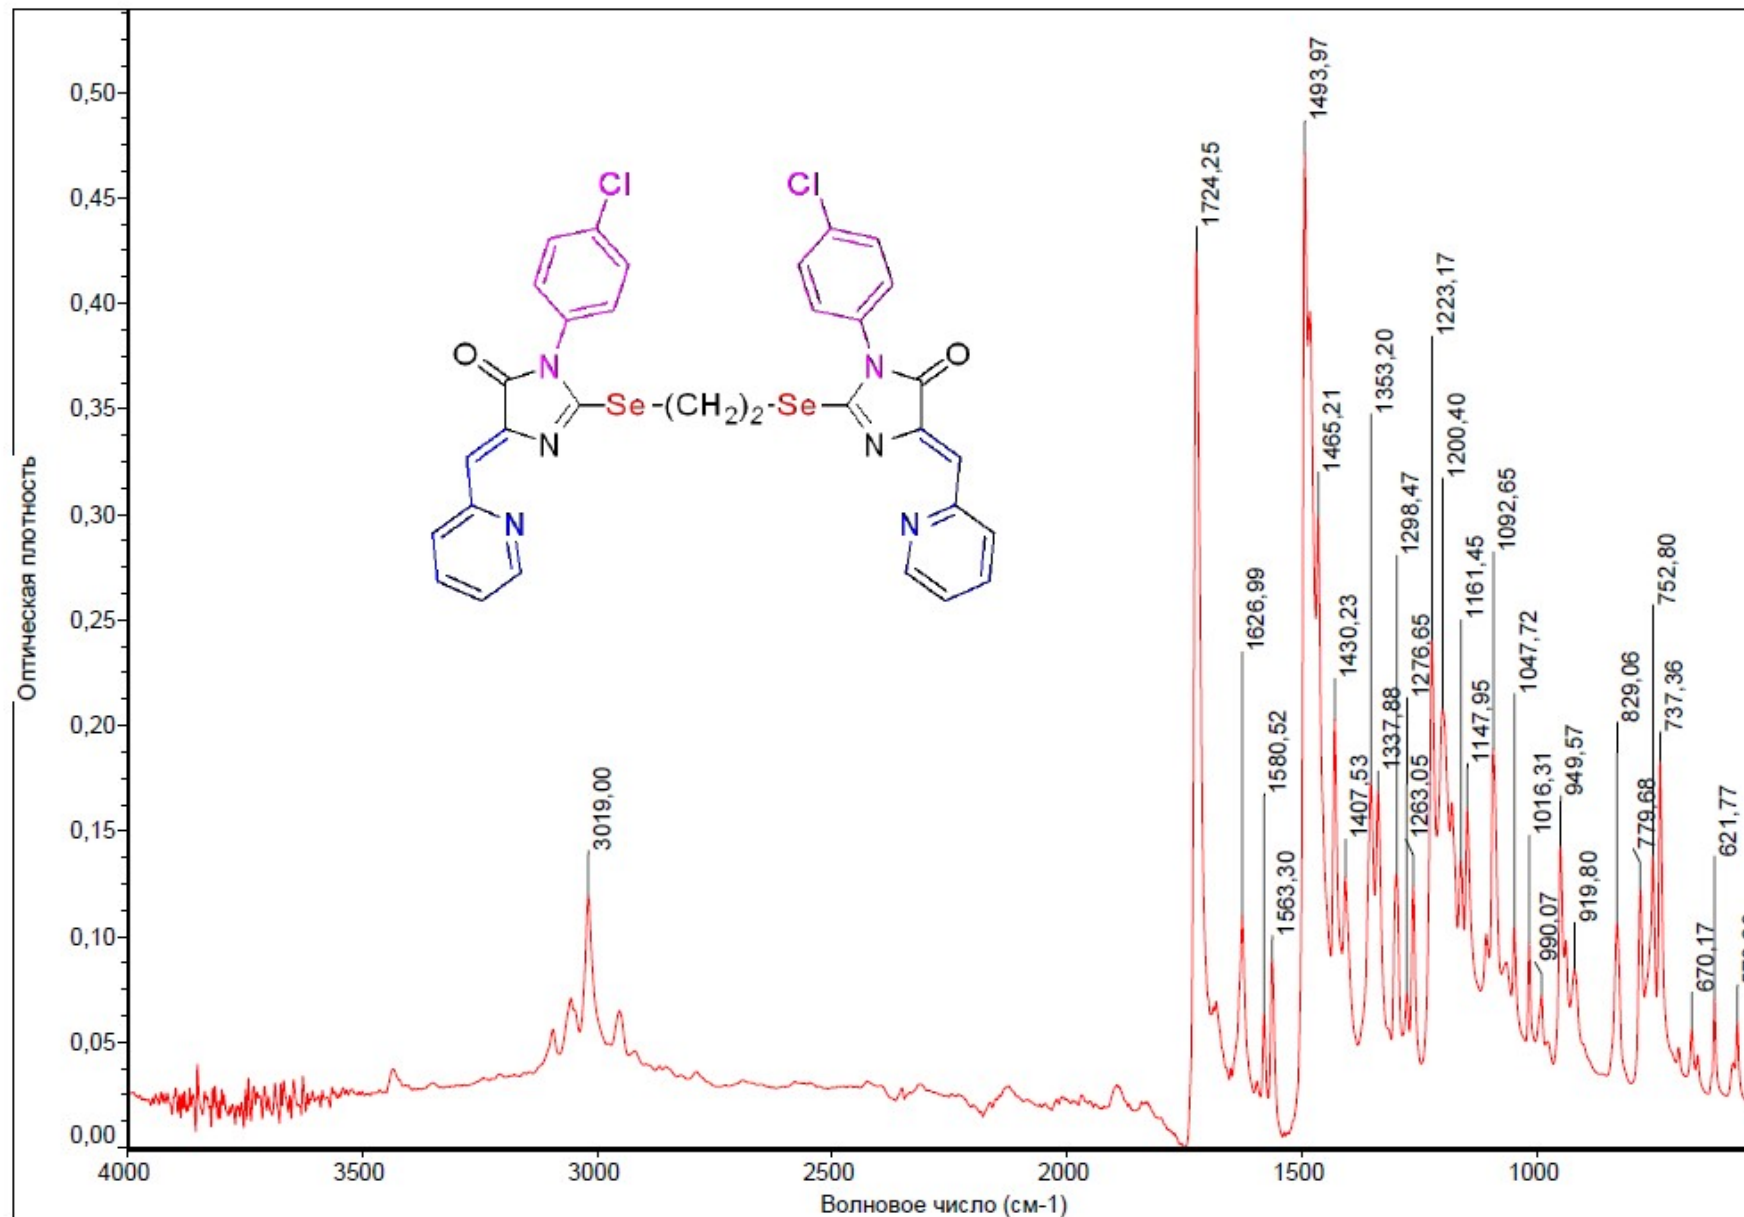

NMR  $^1\text{H}$  (4Z,4'Z)-2,2'-(ethane-1,2-diylbis(selanediyl))bis(1-allyl-4-(pyridin-2-ylmethylene)-1H-imidazol-5(4H)-one) (**4d**).

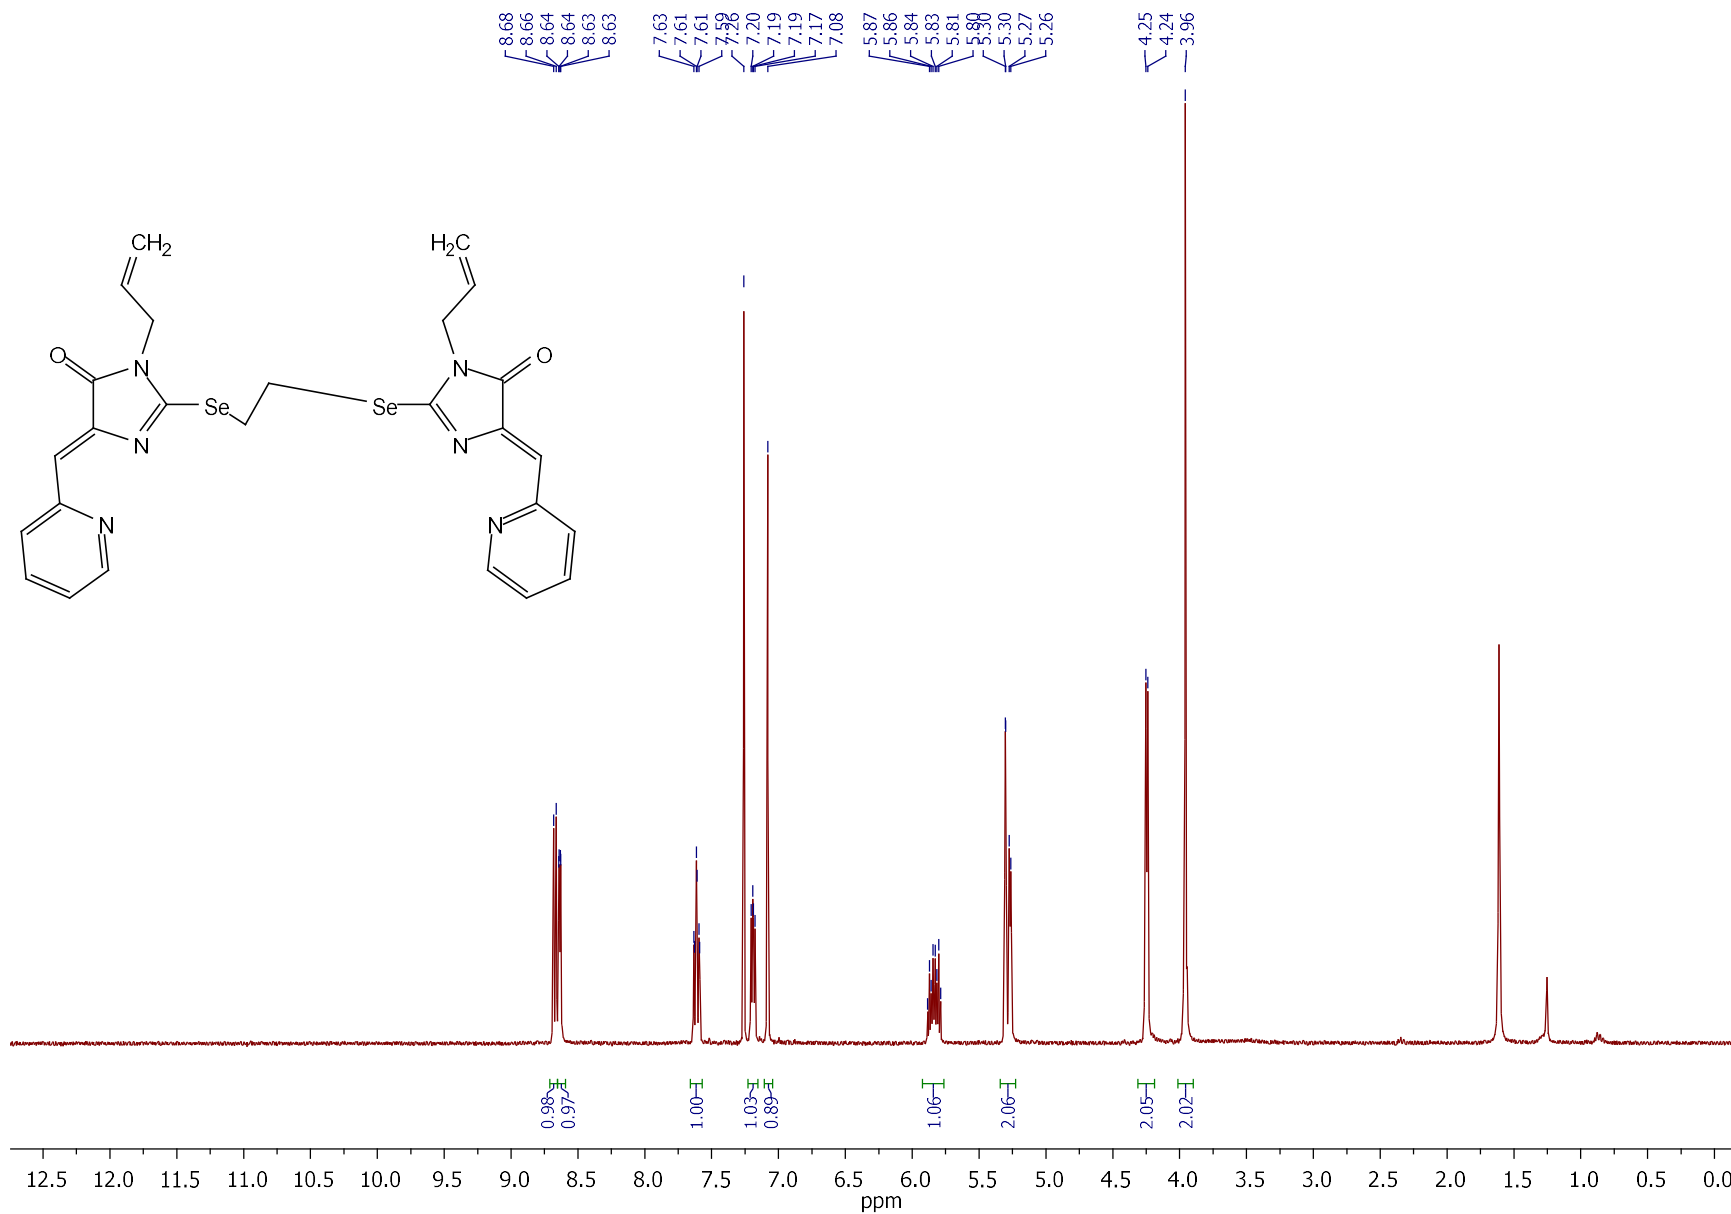

NMR  $^{13}\text{C}$  (4Z,4'Z)-2,2'-(ethane-1,2-diylbis(selanediyl))bis(1-allyl-4-(pyridin-2-ylmethylene)-1H-imidazol-5(4H)-one) (**4d**).

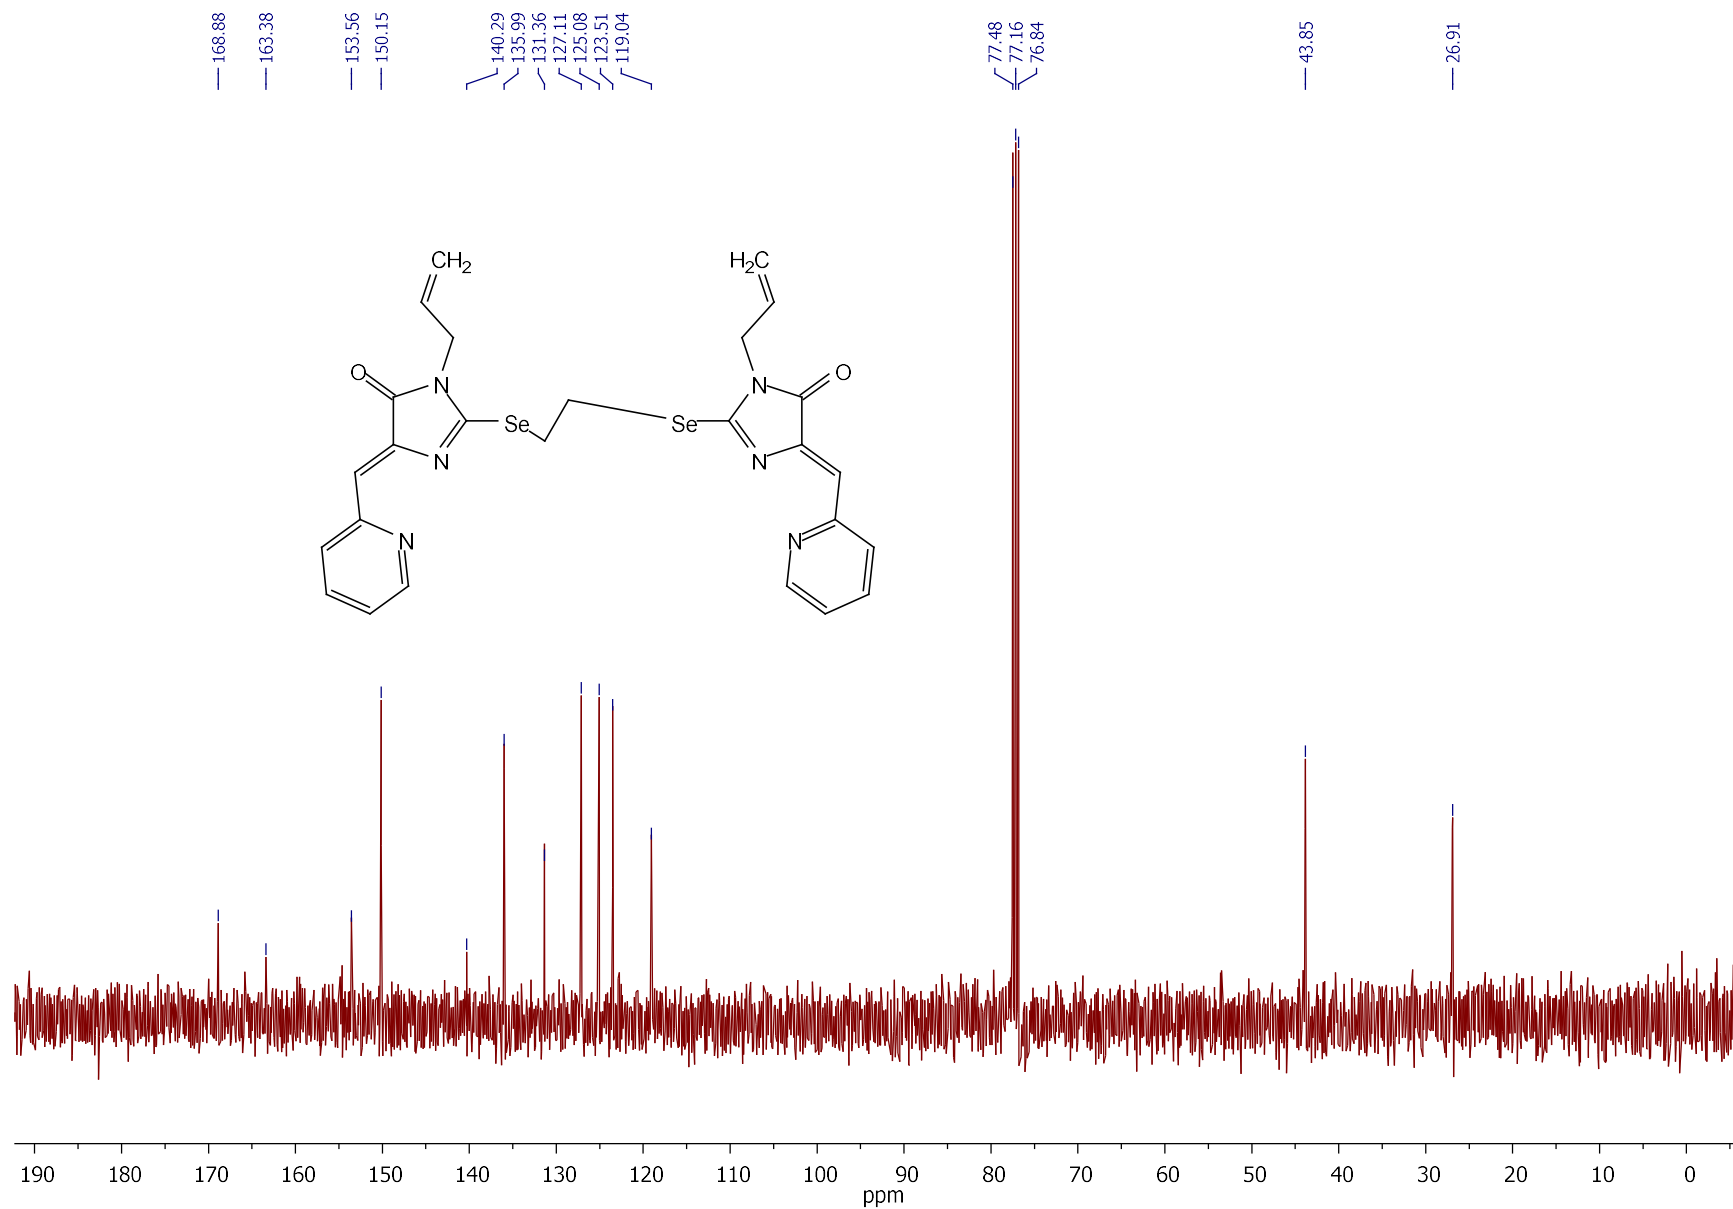

FTIR (4Z,4'Z)-2,2'-(ethane-1,2-diylbis(selanediyl))bis(1-allyl-4-(pyridin-2-ylmethylene)-1H-imidazol-5(4H)-one) (**4d**).

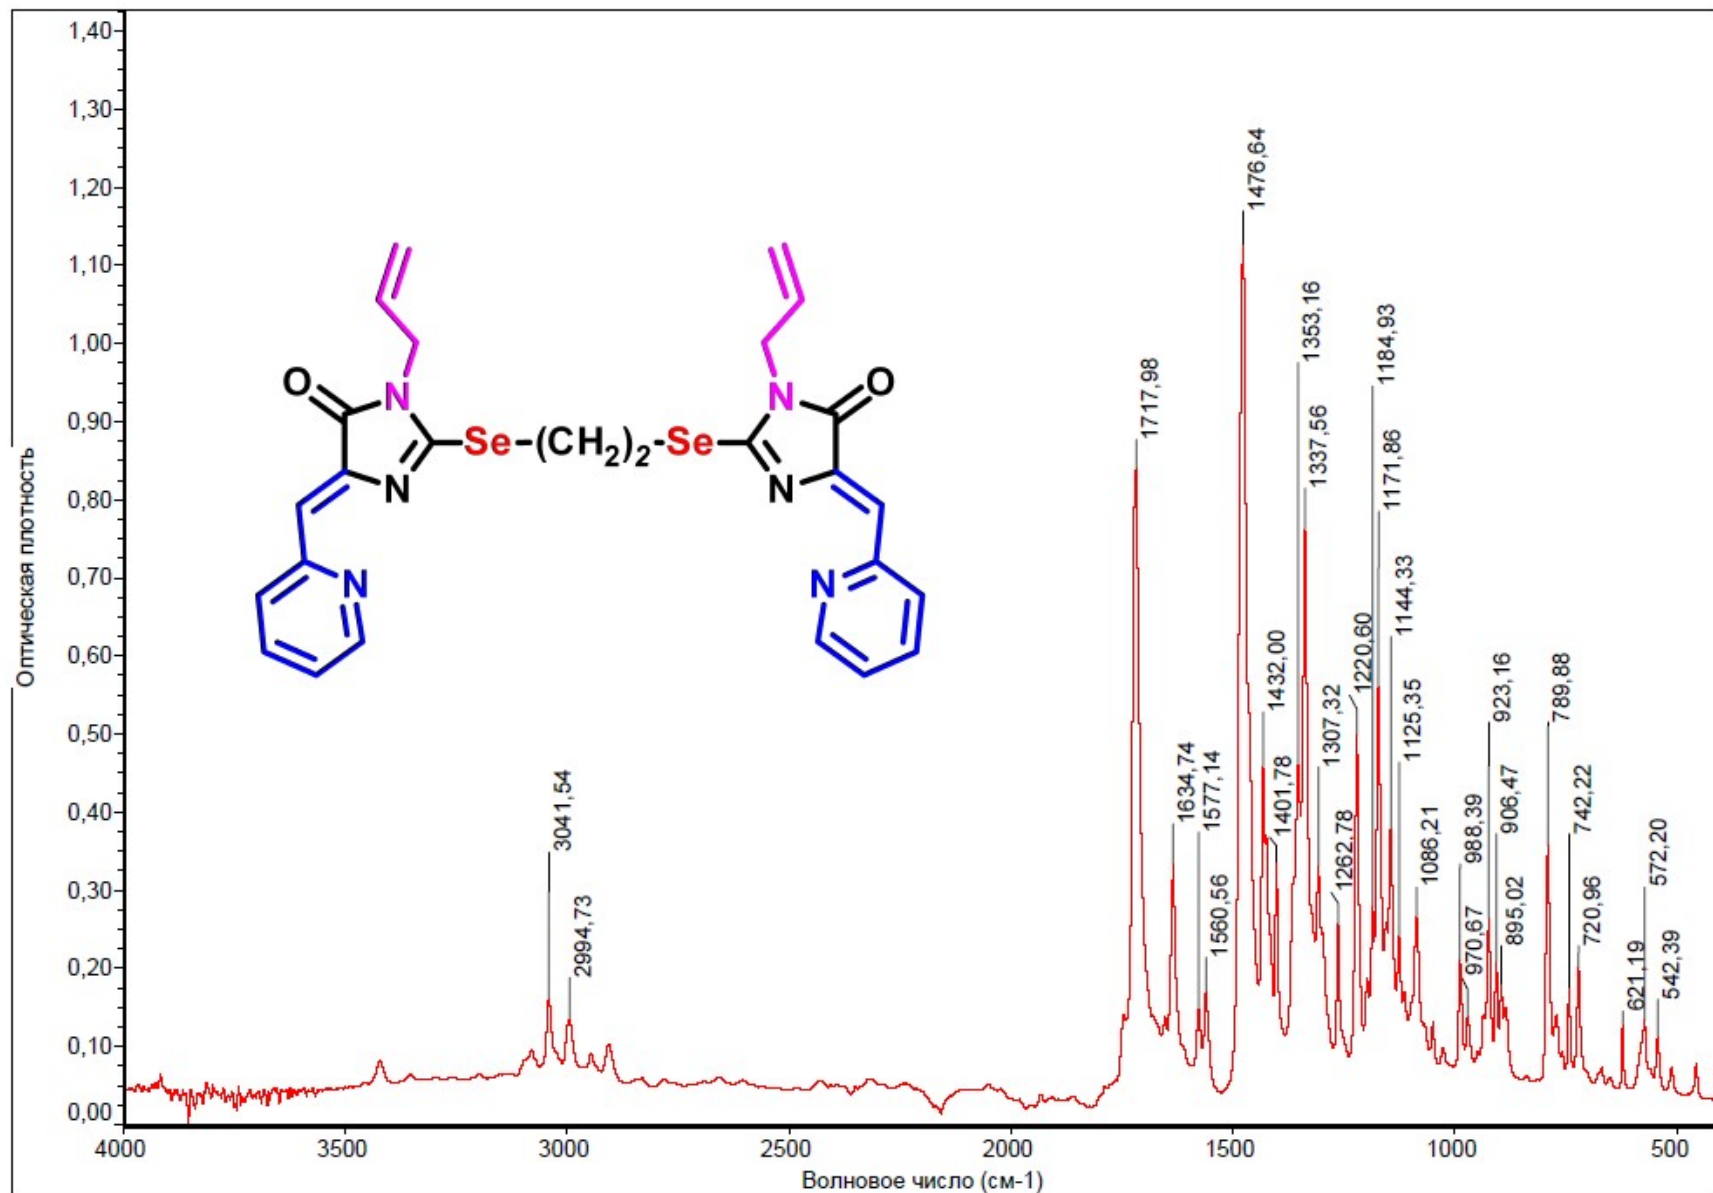

NMR  $^1\text{H}$  (4Z,4'Z)-2,2'-(ethane-1,2-diylbis(selenediyl))bis(1-cyclopropyl-4-(pyridin-2-ylmethylene)-1H-imidazol-5(4H)-one) (**4e**).

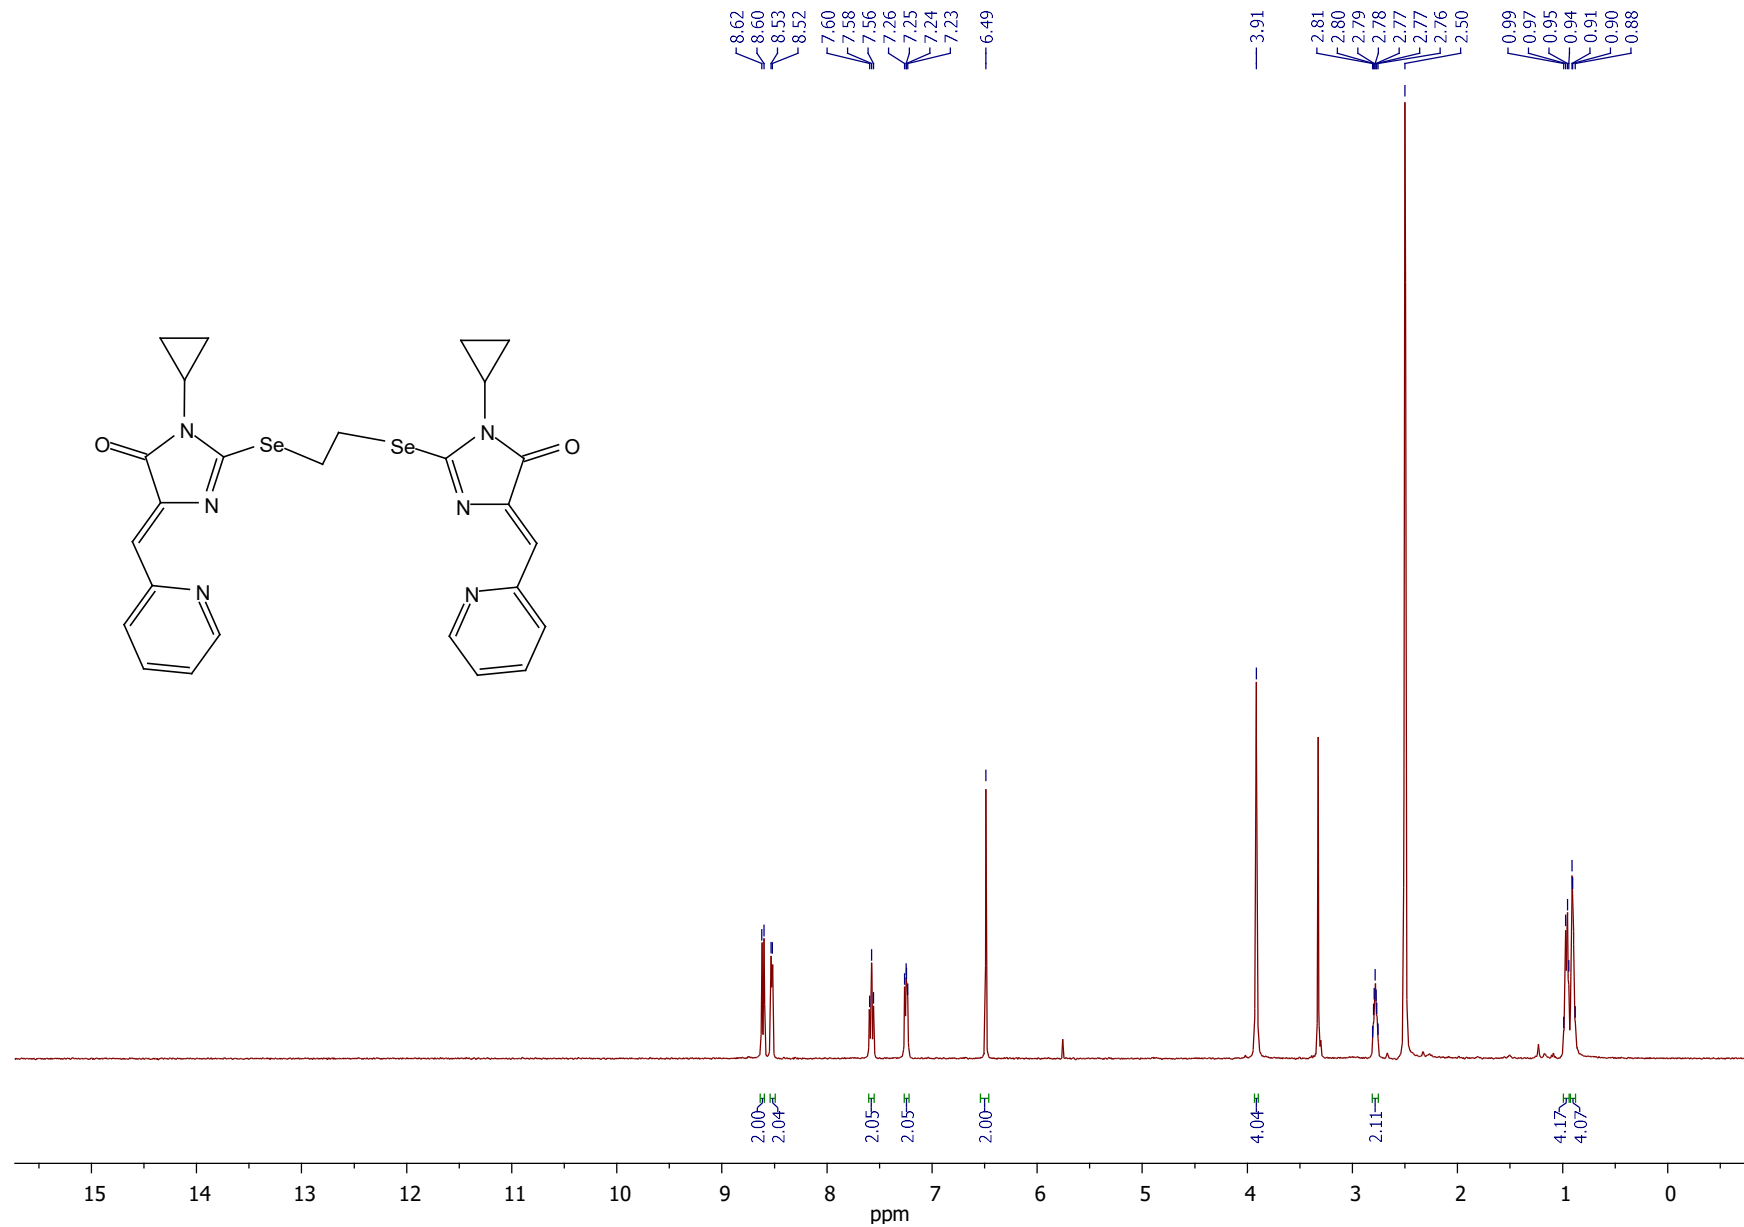

NMR  $^{13}\text{C}$  (4Z,4'Z)-2,2'-(ethane-1,2-diylbis(selanediyl))bis(1-cyclopropyl-4-(pyridin-2-ylmethylene)-1H-imidazol-5(4H)-one) (4e).

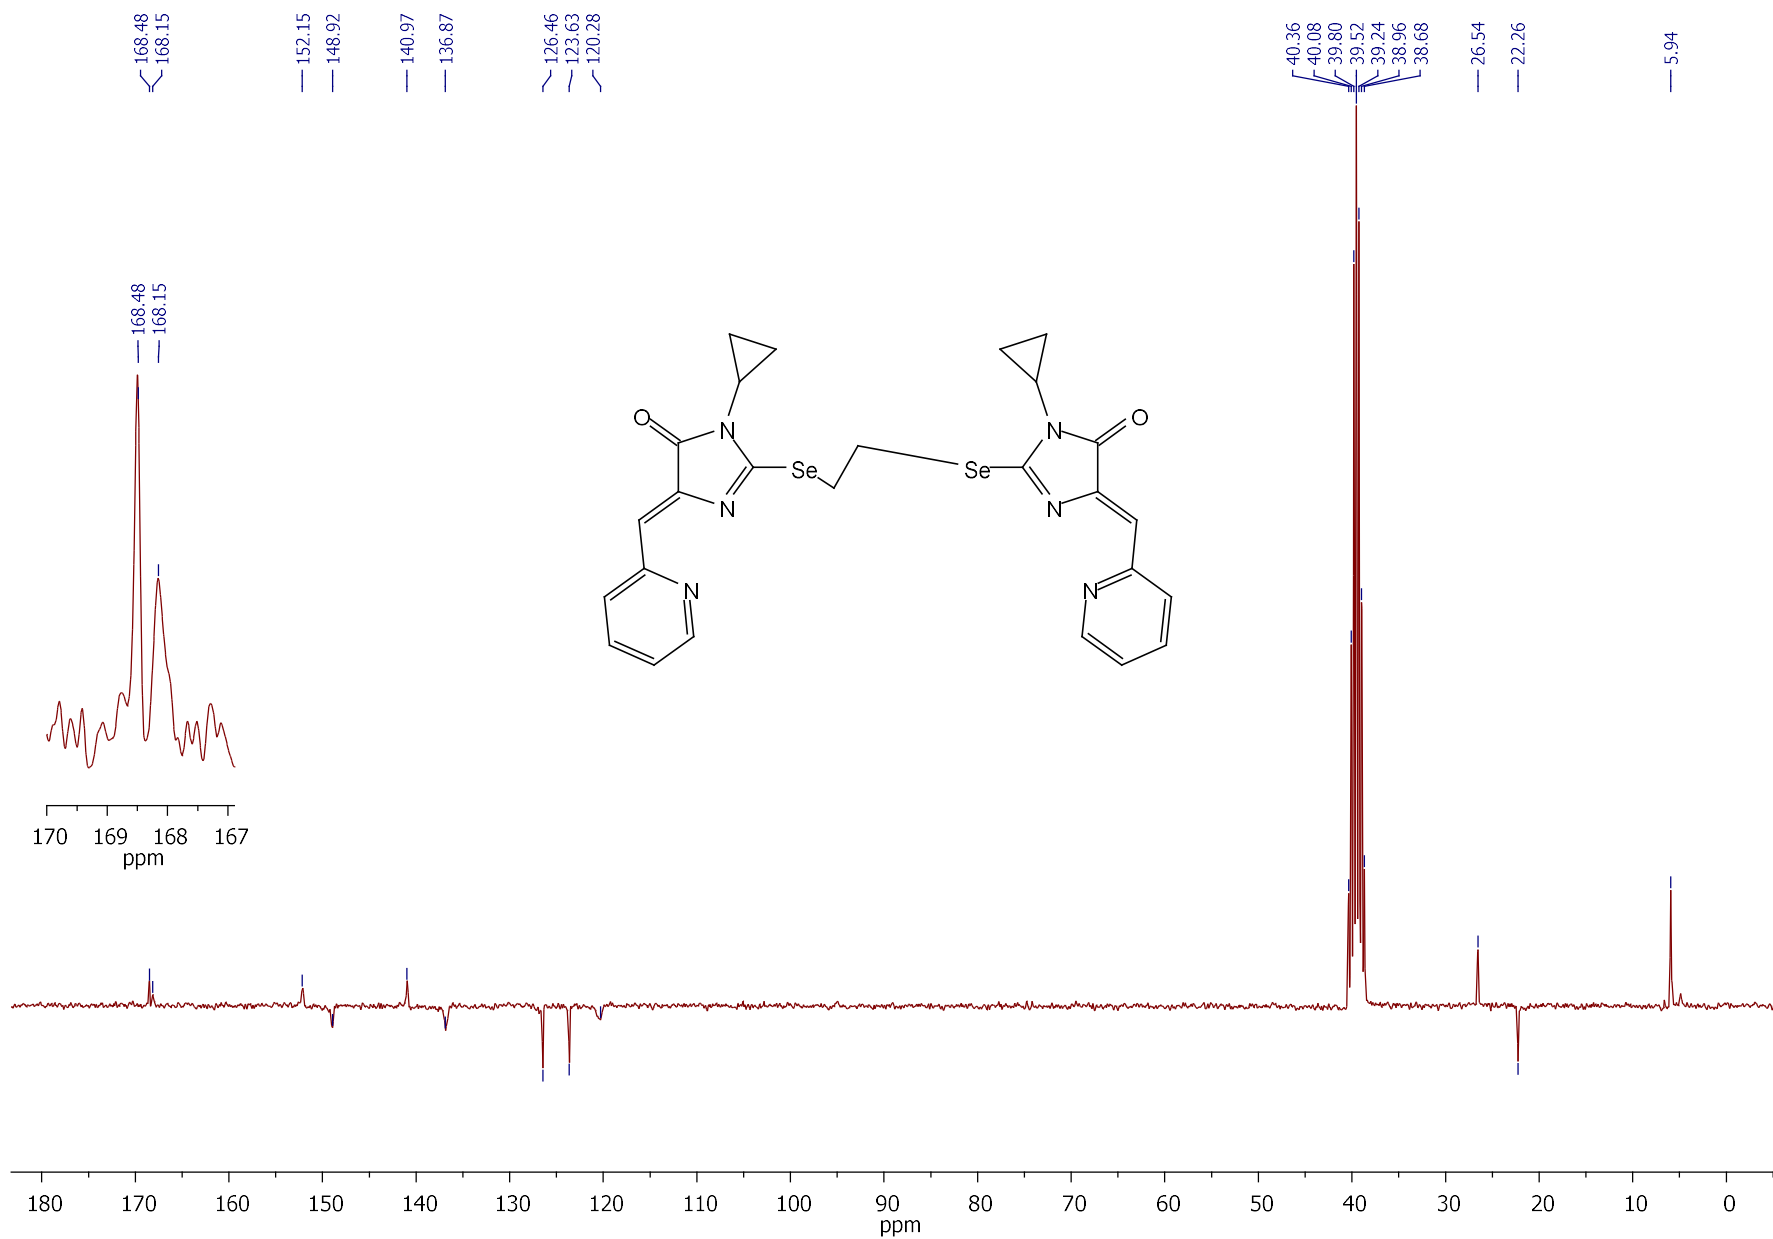



FTIR (4Z,4'Z)-2,2'-(ethane-1,2-diylbis(selanediyl))bis(1-cyclopropyl-4-(pyridin-2-ylmethylene)-1H-imidazol-5(4H)-one) (4e).

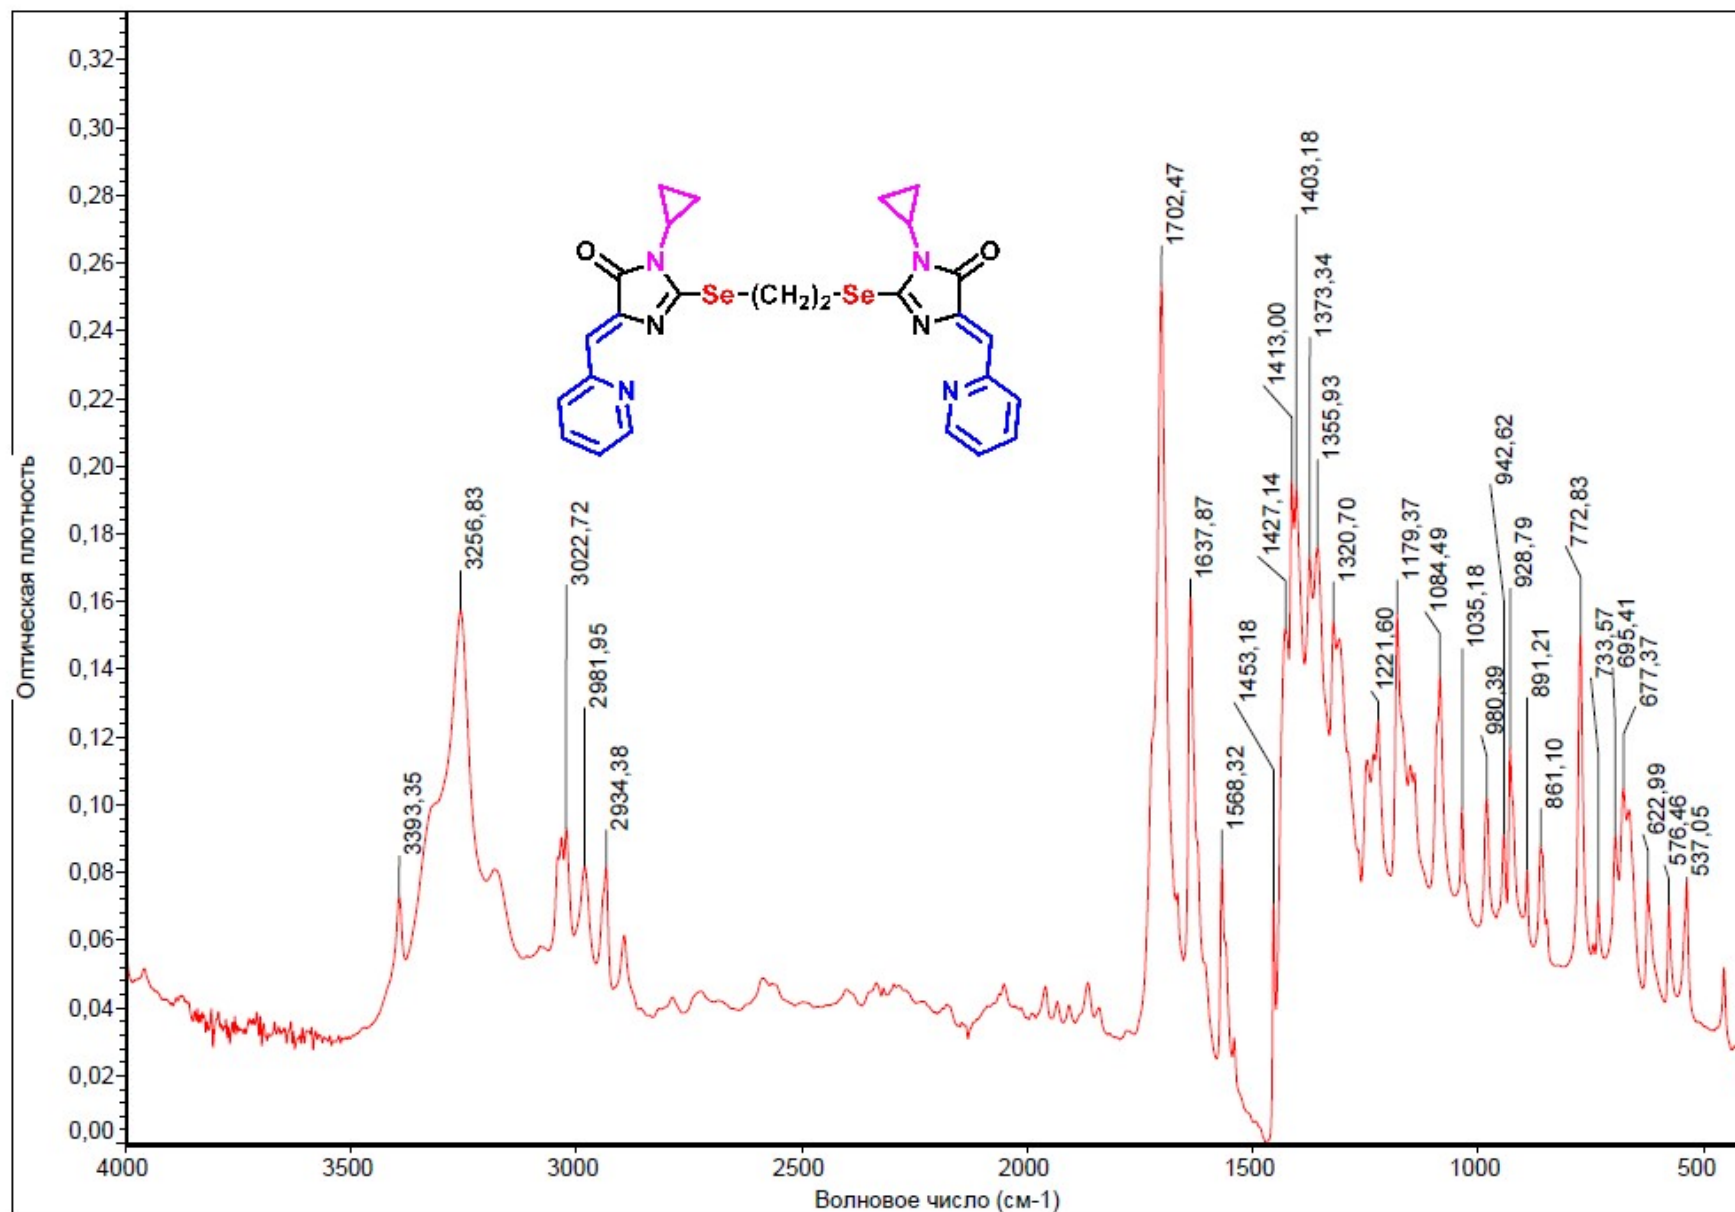

*NMR* <sup>1</sup>H (4*Z*,4'*Z*)-2,2'-(butane-1,4-diylbis(selanediyl))bis(1-allyl-4-(pyridin-2-ylmethylene)-1*H*-imidazol-5(4*H*)-one) (**4f**).

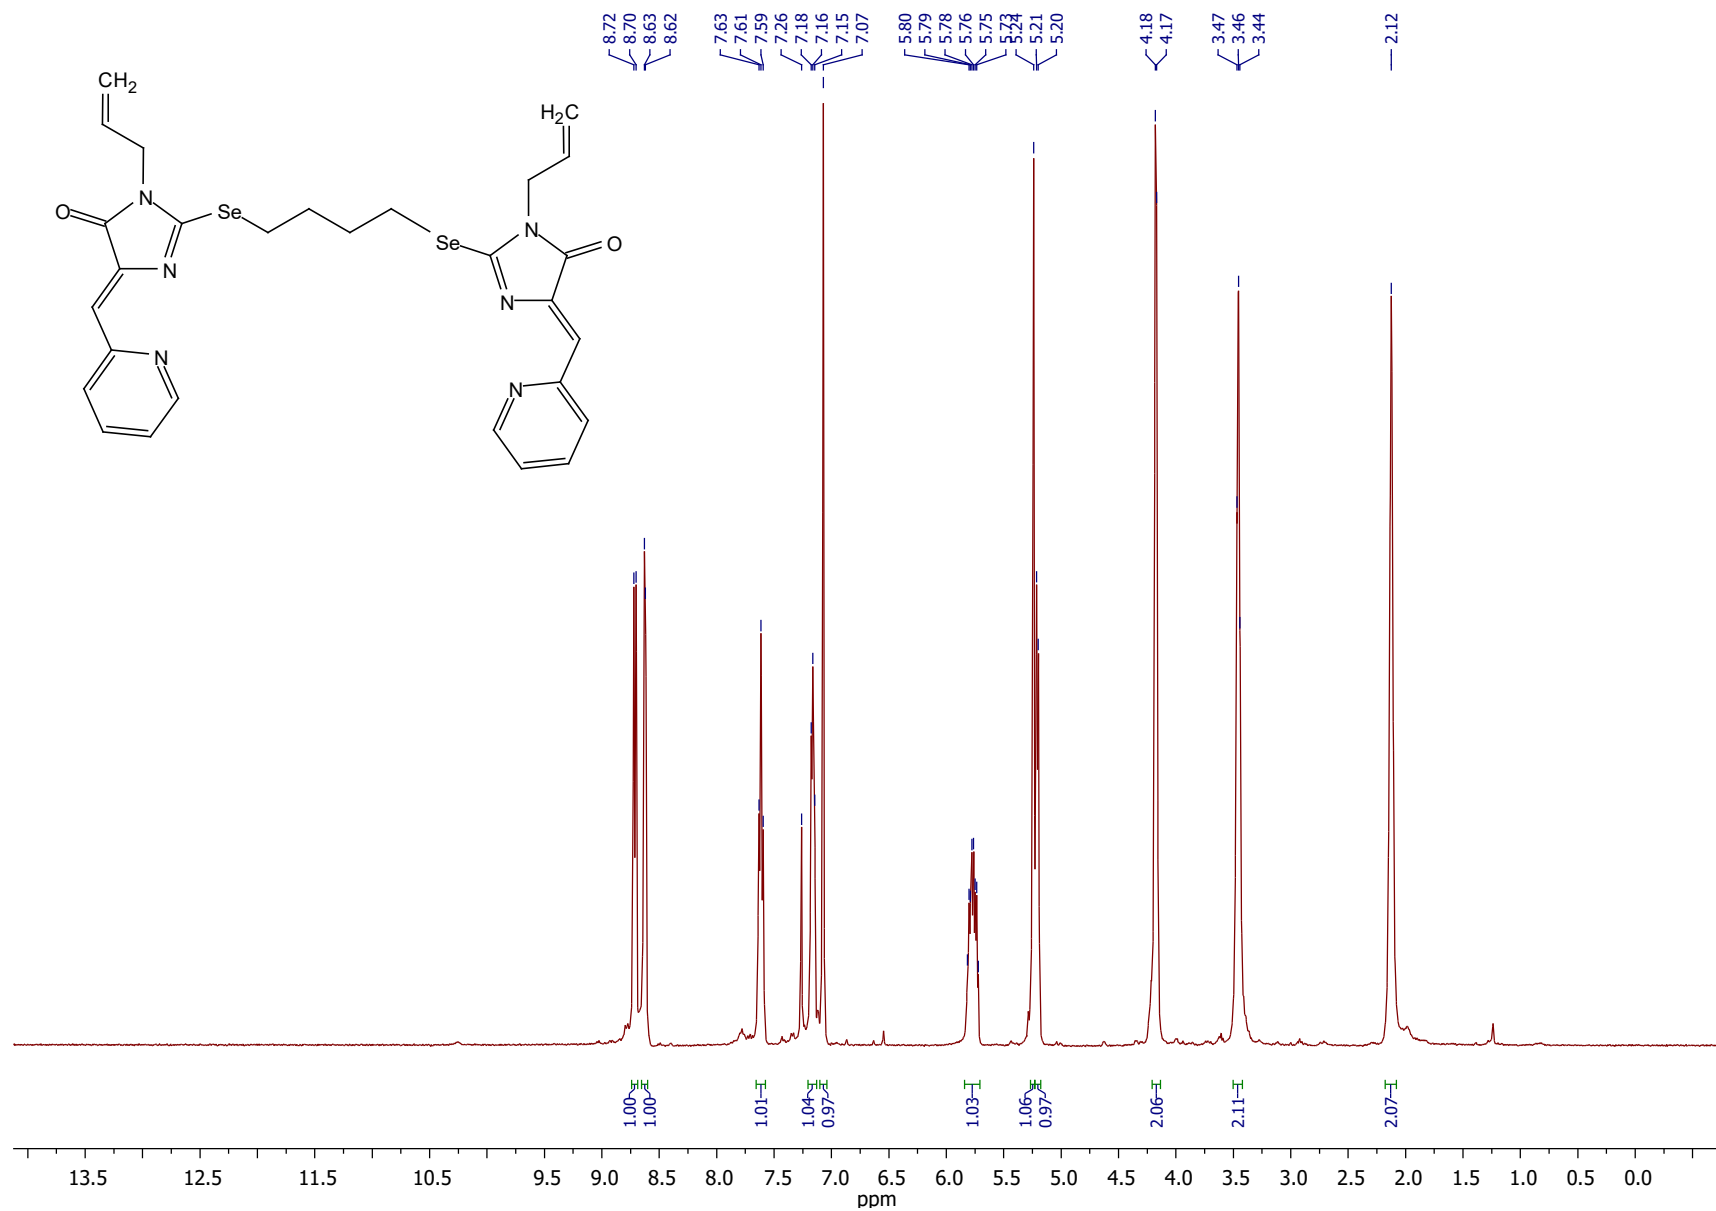

*NMR*  $^{13}\text{C}$  (*4Z,4'Z*)-2,2'-(butane-1,4-diylbis(selanediyl))bis(1-allyl-4-(pyridin-2-ylmethylene)-1*H*-imidazol-5(4*H*)-one) (**4f**).

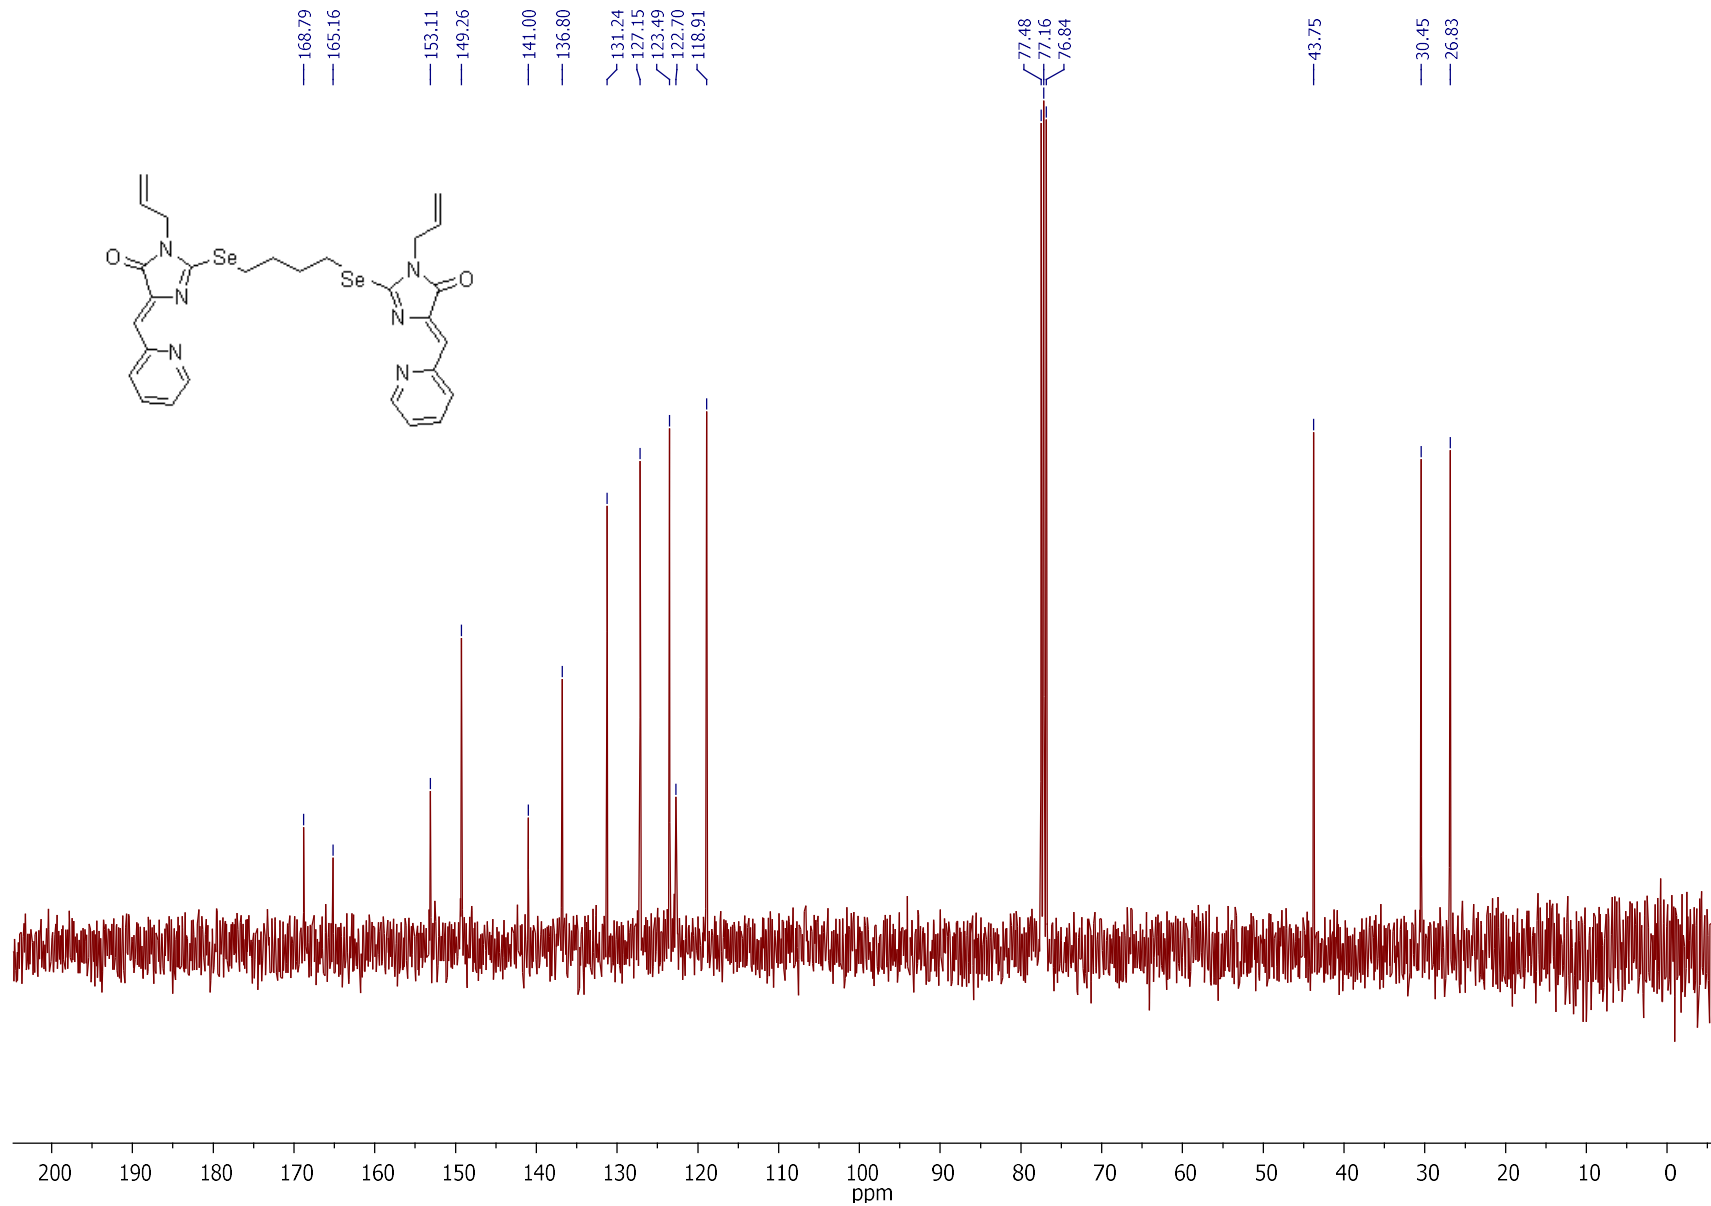

FTIR (4Z,4'Z)-2,2'-(butane-1,4-diylbis(selanediyl))bis(1-allyl-4-(pyridin-2-ylmethylene)-1H-imidazol-5(4H)-one) (**4e**).

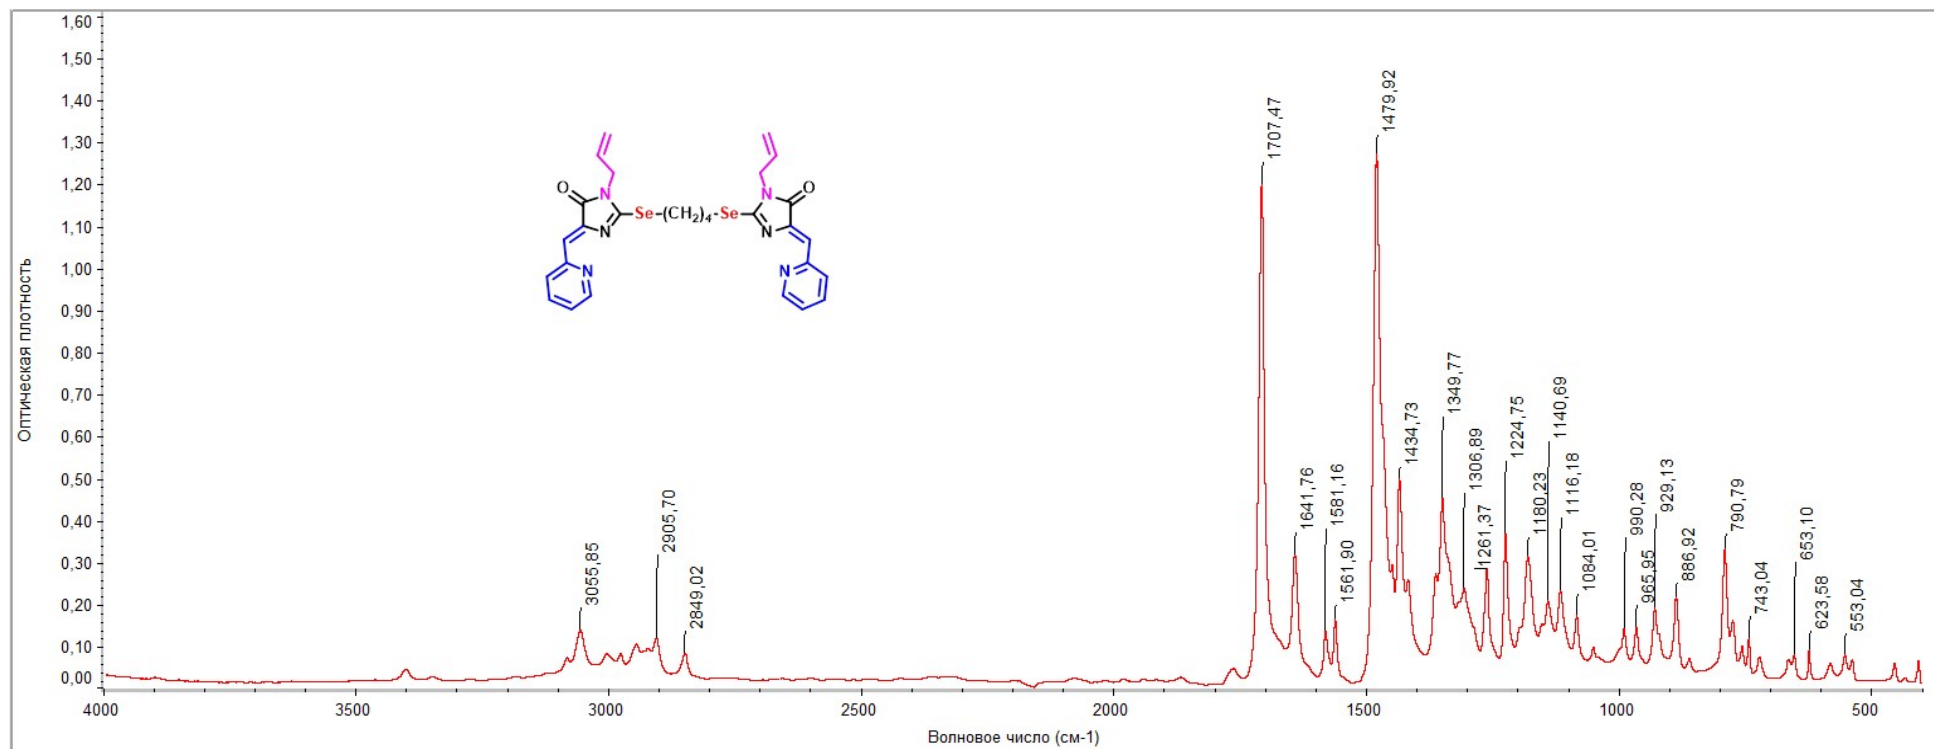

NMR  $^1\text{H}$  (4Z,4'Z)-2,2'-(butane-1,4-diylbis(selanediyl))bis(1-cyclopropyl-4-(pyridin-2-ylmethylene)-1H-imidazol-5(4H)-one) (**4g**).

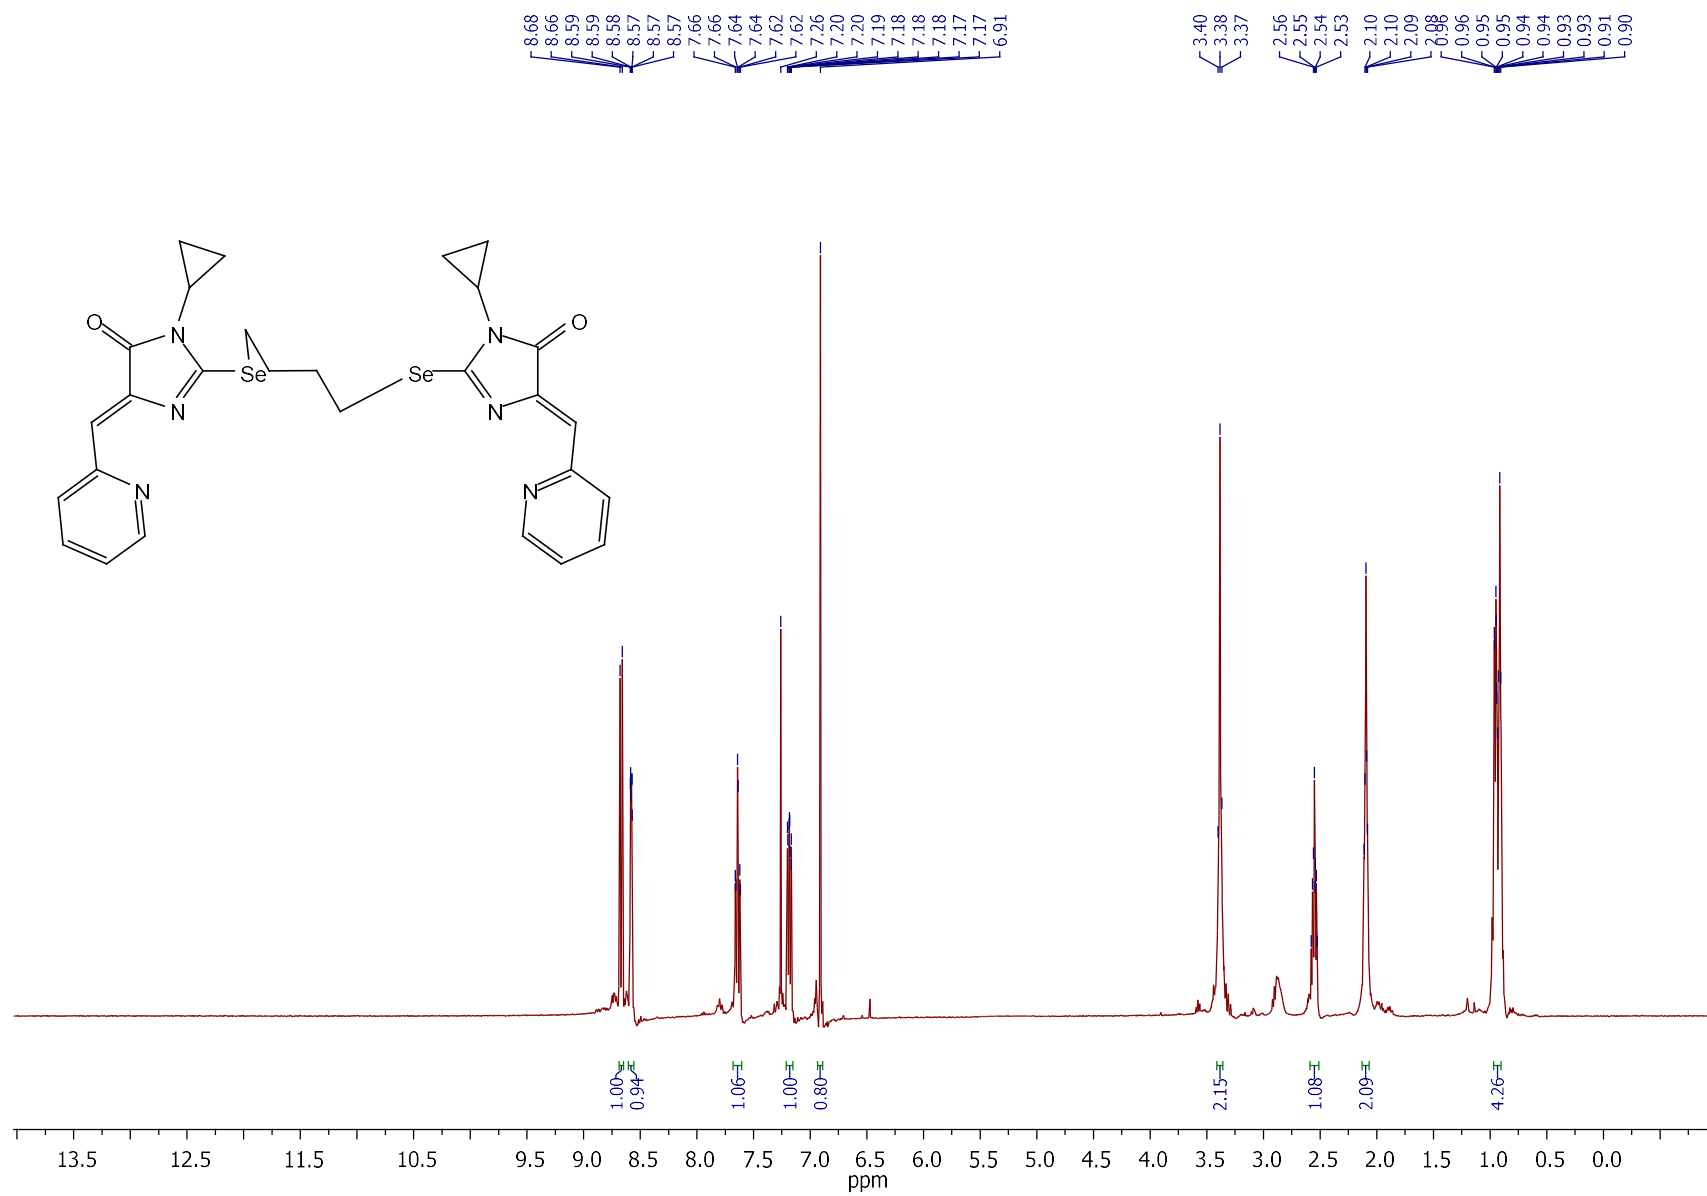

NMR  $^{13}\text{C}$  (4Z,4'Z)-2,2'-(butane-1,4-diylbis(selenediyl))bis(1-cyclopropyl-4-(pyridin-2-ylmethylene)-1H-imidazol-5(4H)-one) (**4g**).

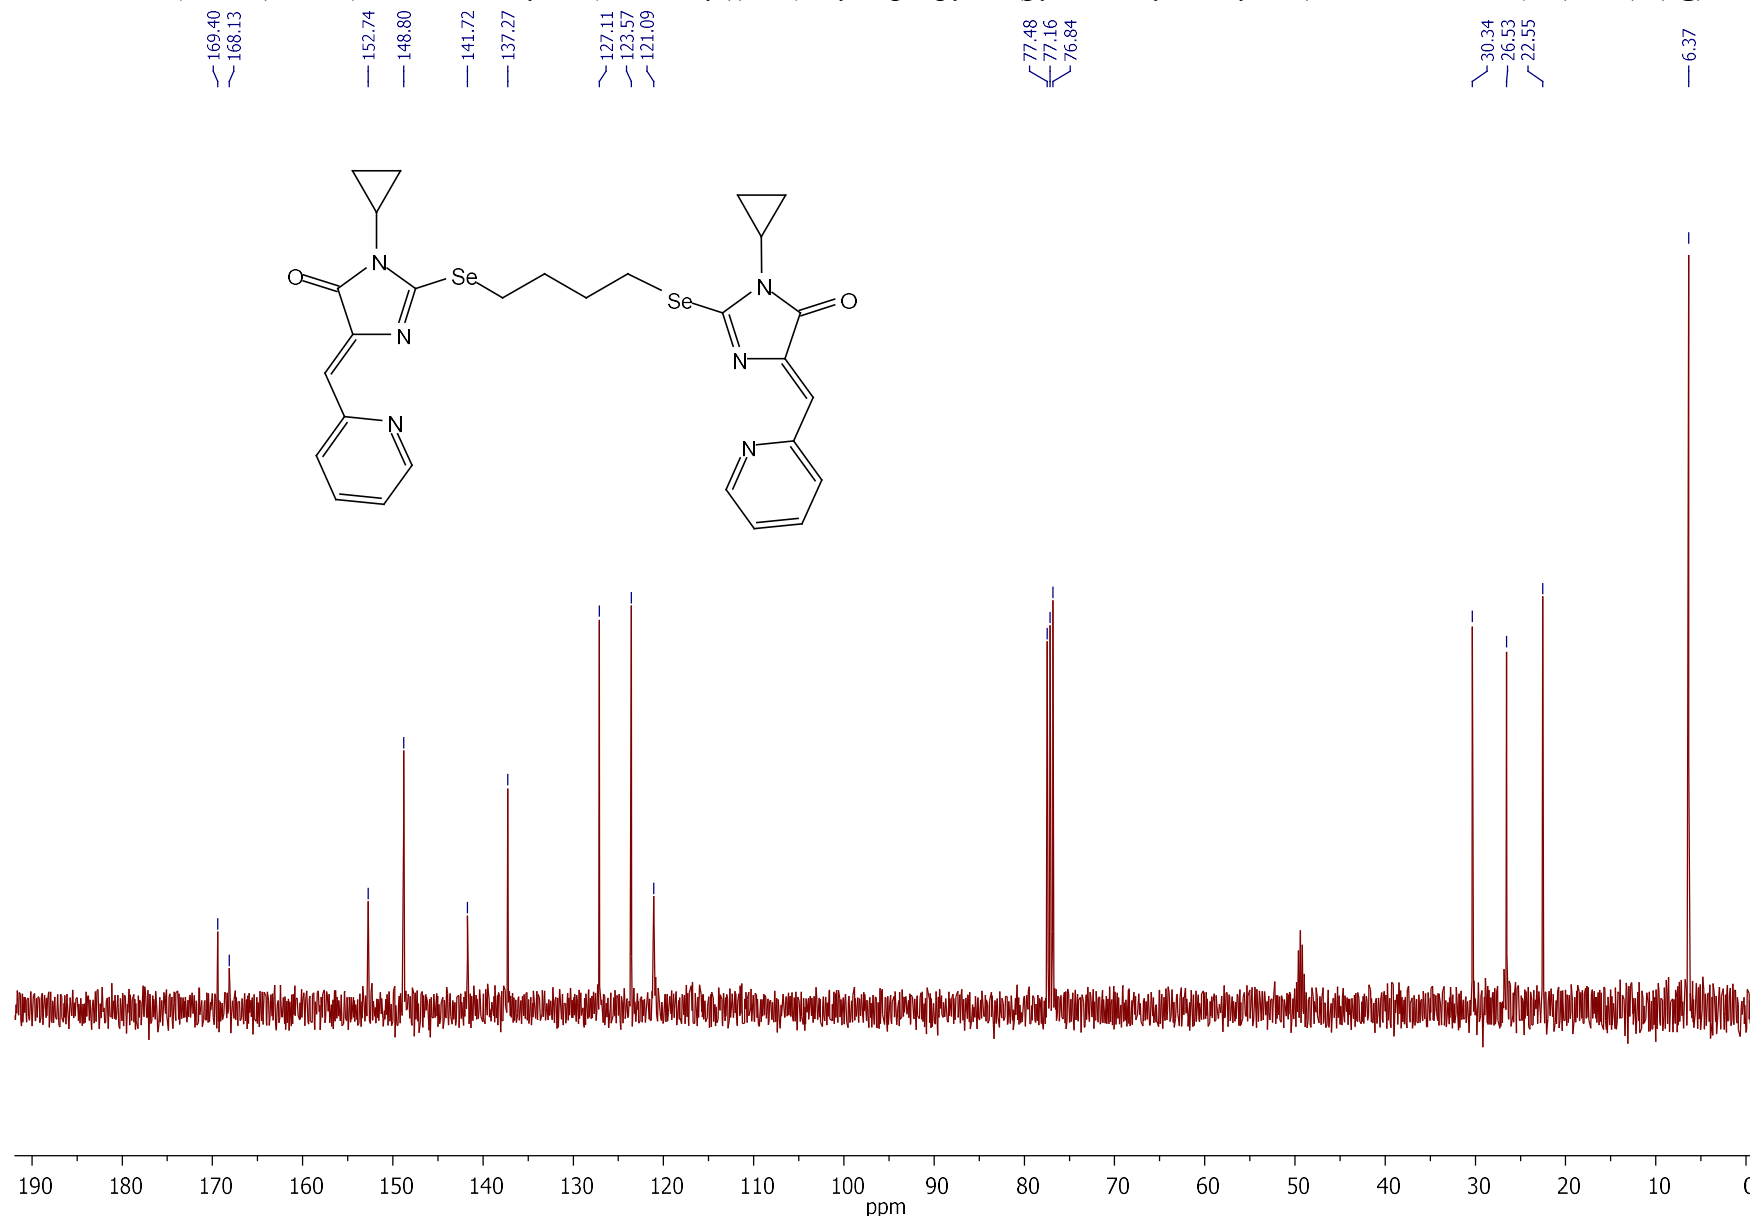

FTIR (4Z,4'Z)-2,2'-(butane-1,4-diylbis(selanediyl))bis(1-cyclopropyl-4-(pyridin-2-ylmethylene)-1H-imidazol-5(4H)-one) (**4g**).

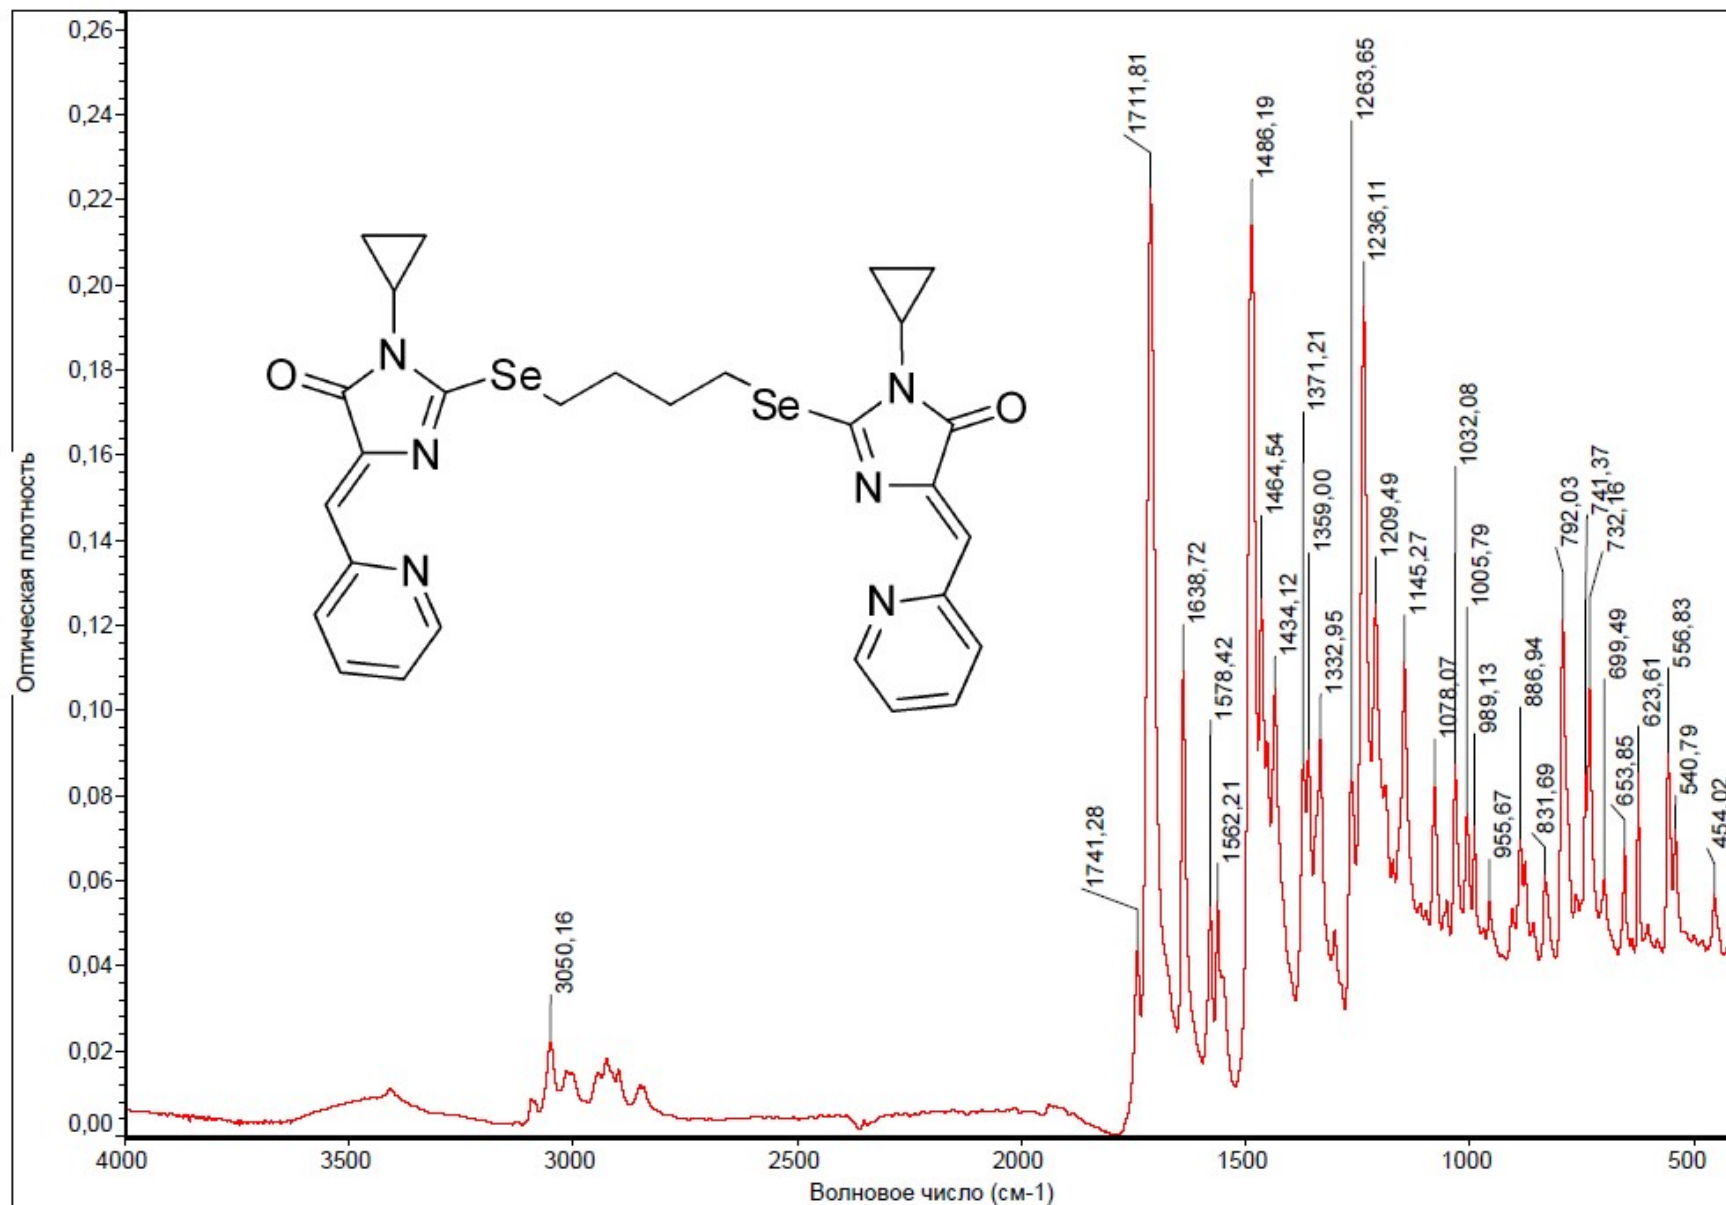

NMR  $^1\text{H}$  (4Z,4'Z)-2,2'-(hexane-1,6-diylbis(selanediyl))bis(1-allyl-4-(pyridin-2-ylmethylene)-1H-imidazol-5(4H)-one) (**4h**).

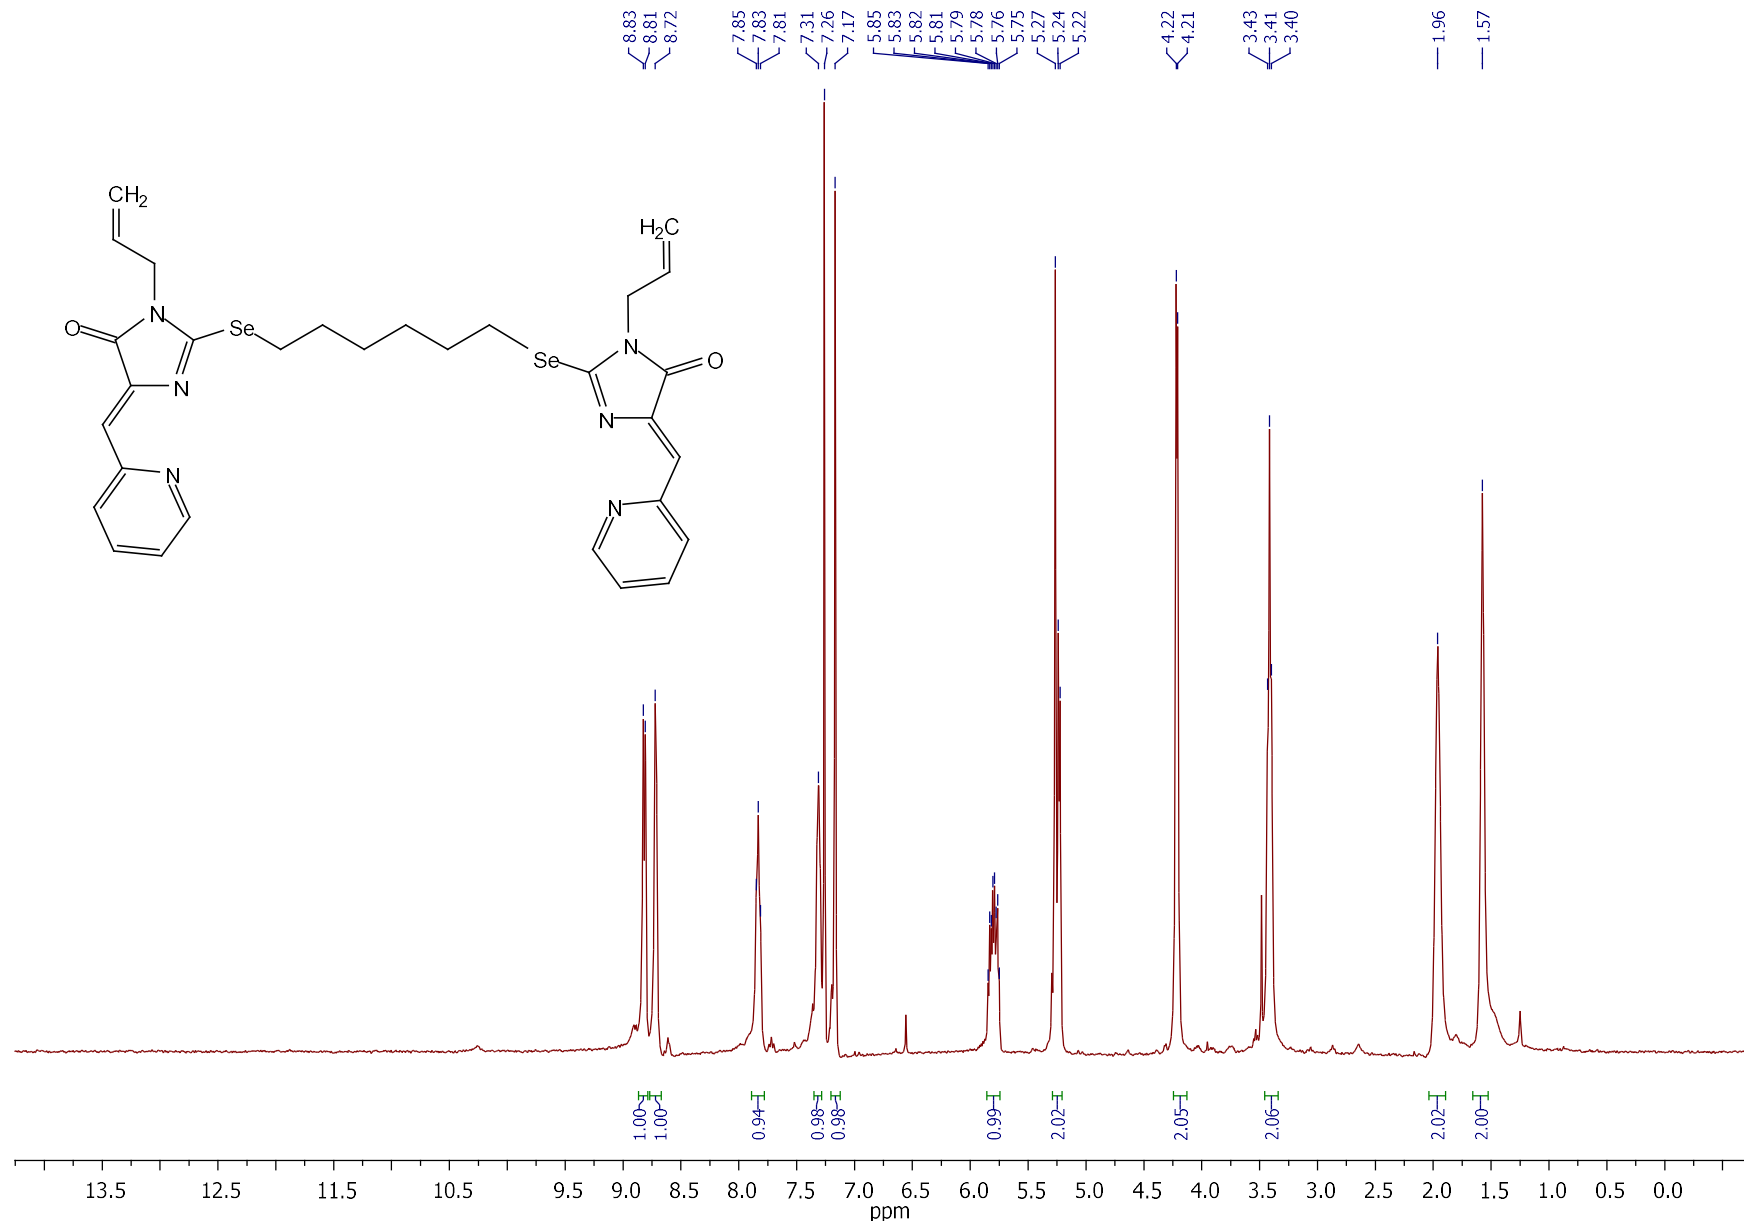



NMR  $^{13}\text{C}$  (4Z,4'Z)-2,2'-(hexane-1,6-diylbis(selenediyl))bis(1-allyl-4-(pyridin-2-ylmethylene)-1H-imidazol-5(4H)-one) (**4h**).

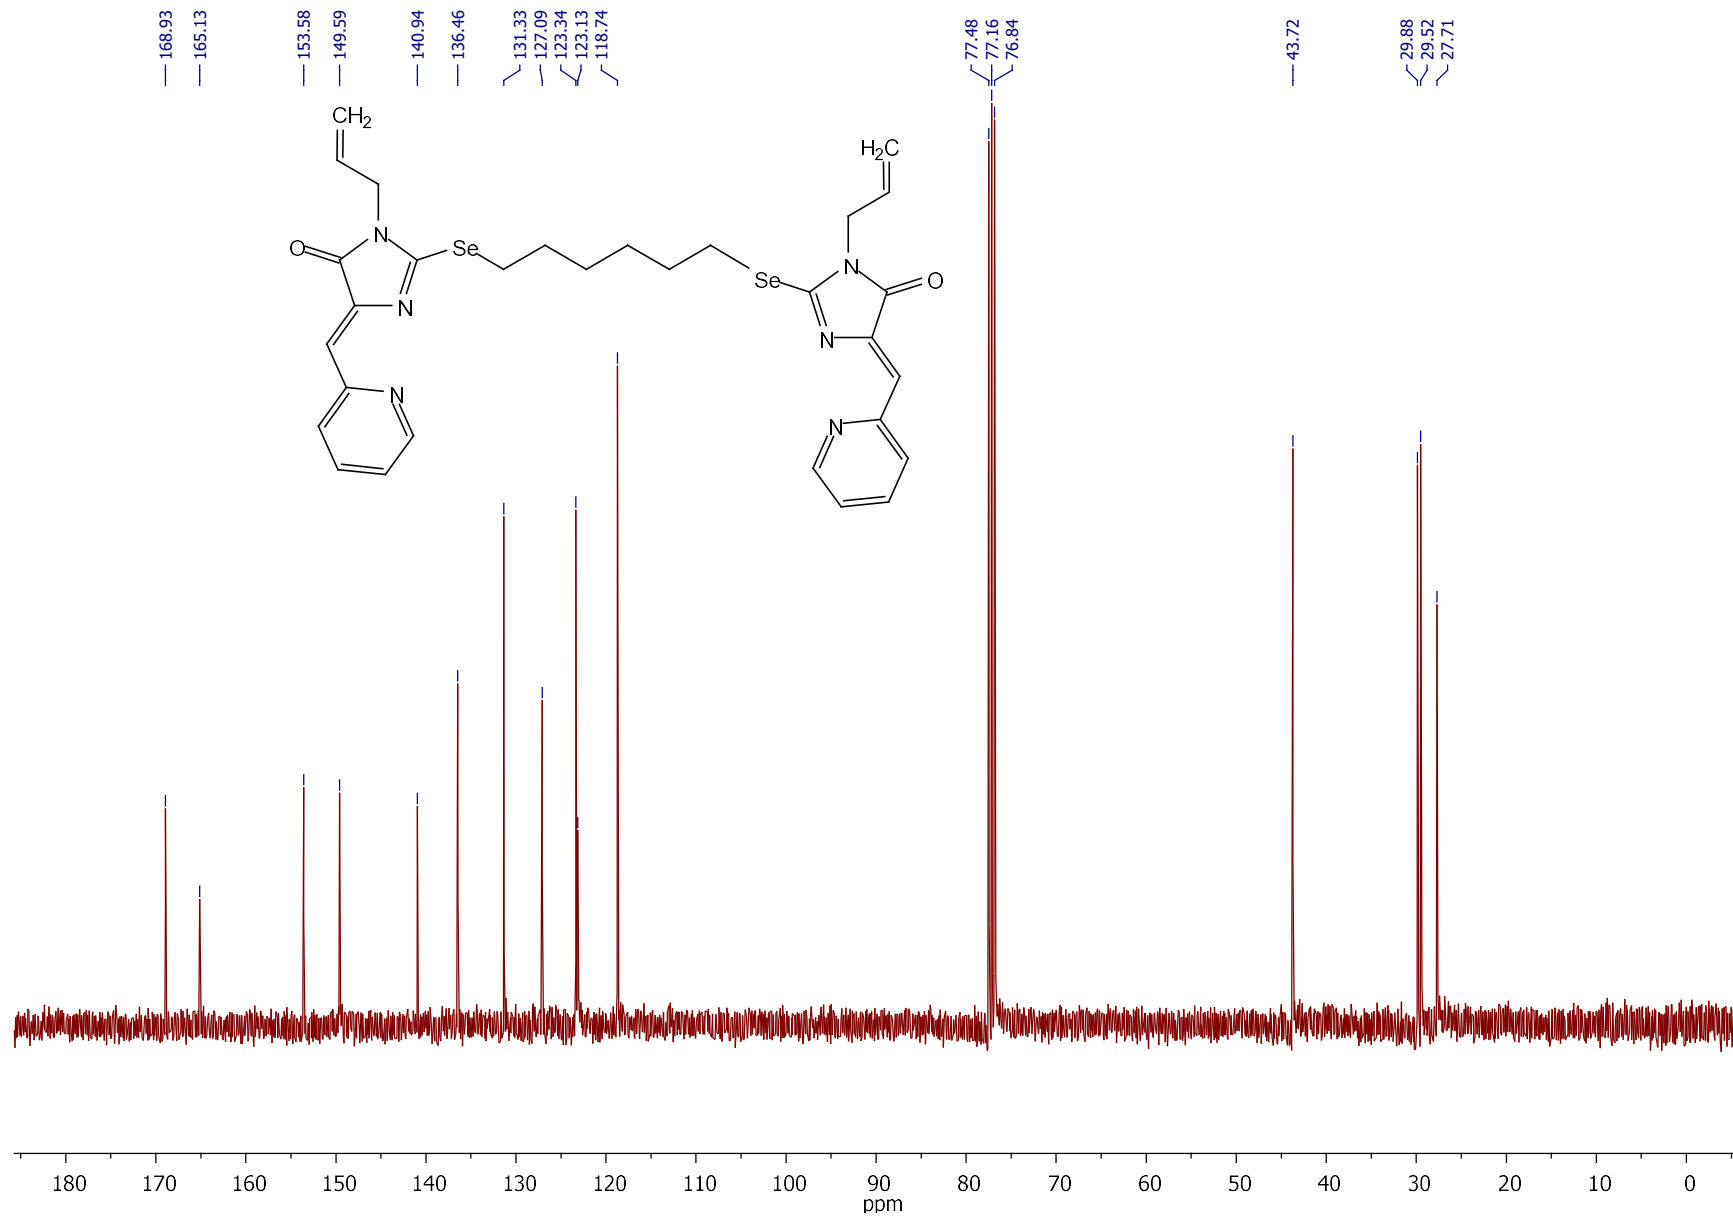

FTIR (4Z,4'Z)-2,2'-(hexane-1,6-diylbis(selanediyl))bis(1-allyl-4-(pyridin-2-ylmethylene)-1H-imidazol-5(4H)-one) (**4h**).

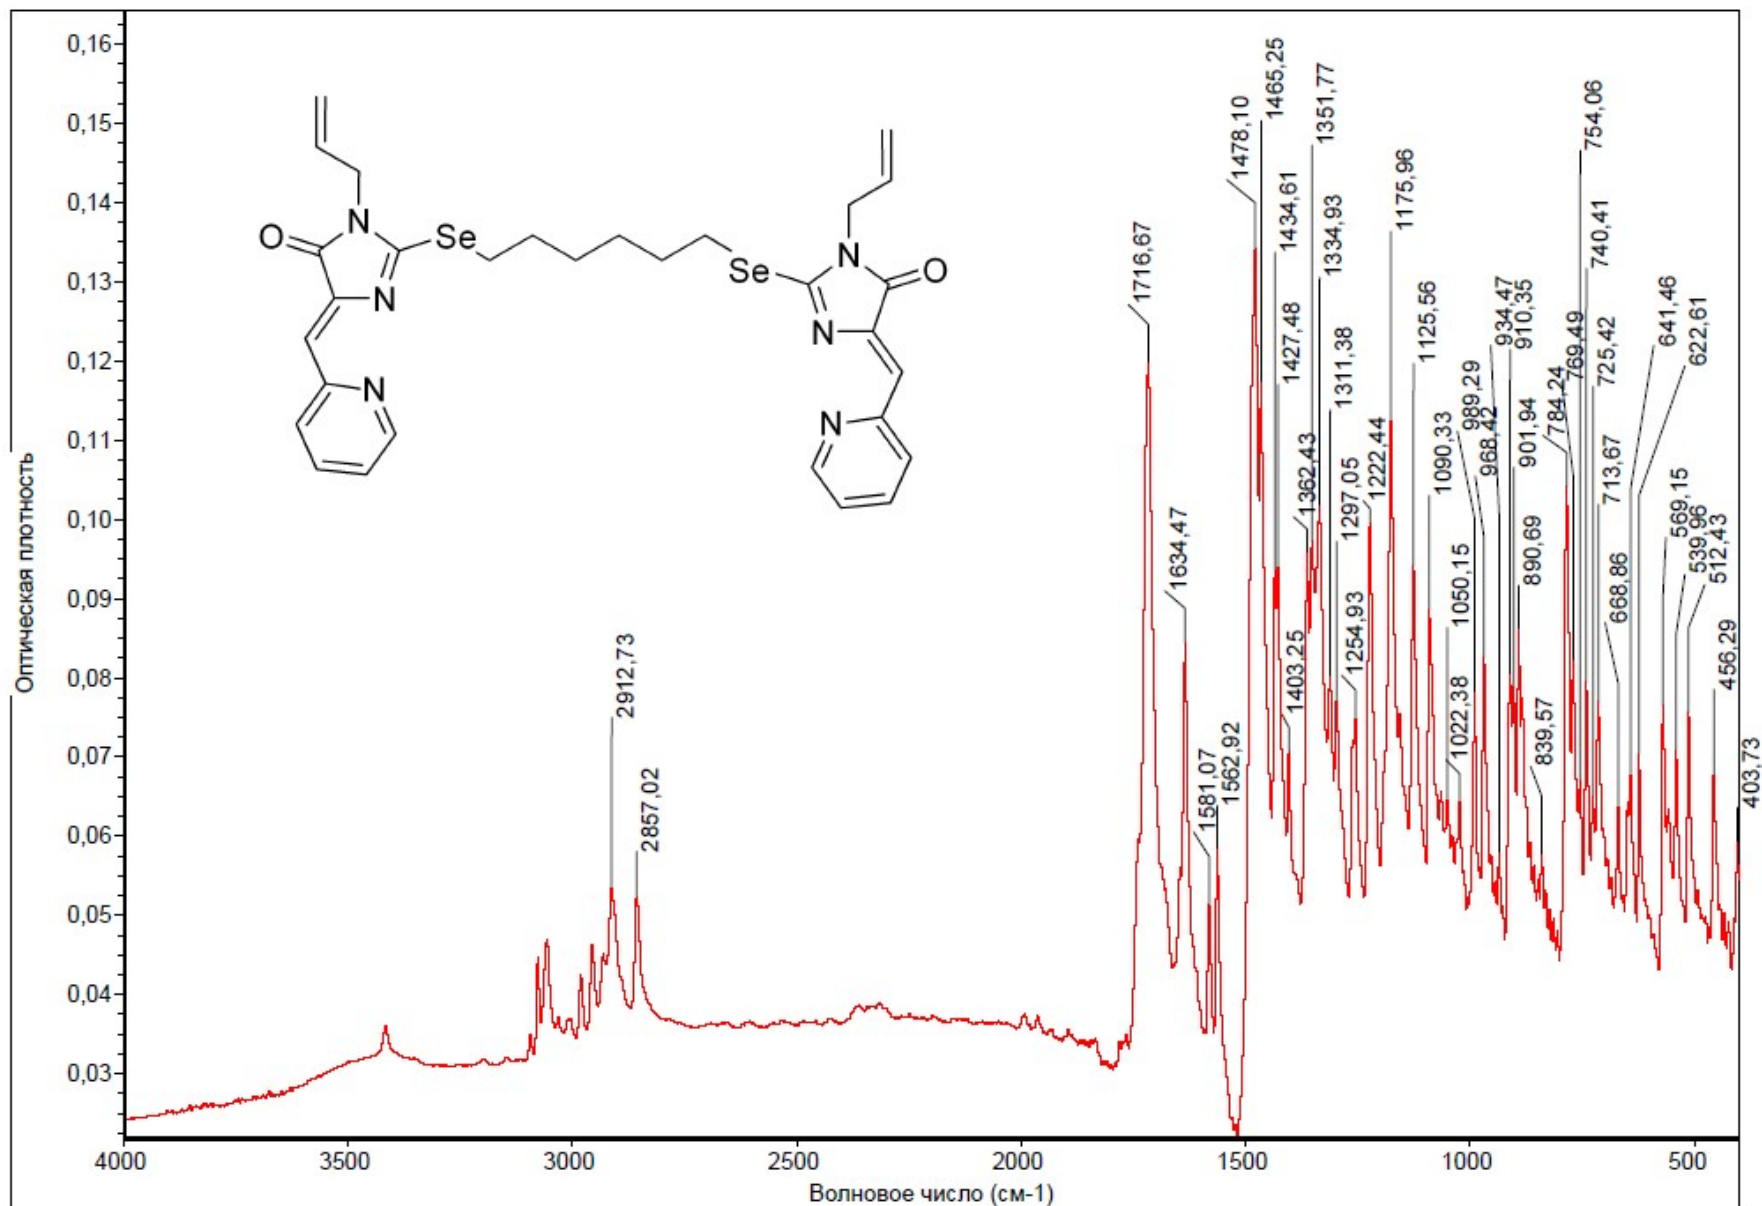

NMR  $^1\text{H}$  (4Z,4'Z)-2,2'-(hexane-1,6-diylbis(selenediyl))bis(1-cyclopropyl-4-(pyridin-2-ylmethylene)-1H-imidazol-5(4H)-one) (**4i**).

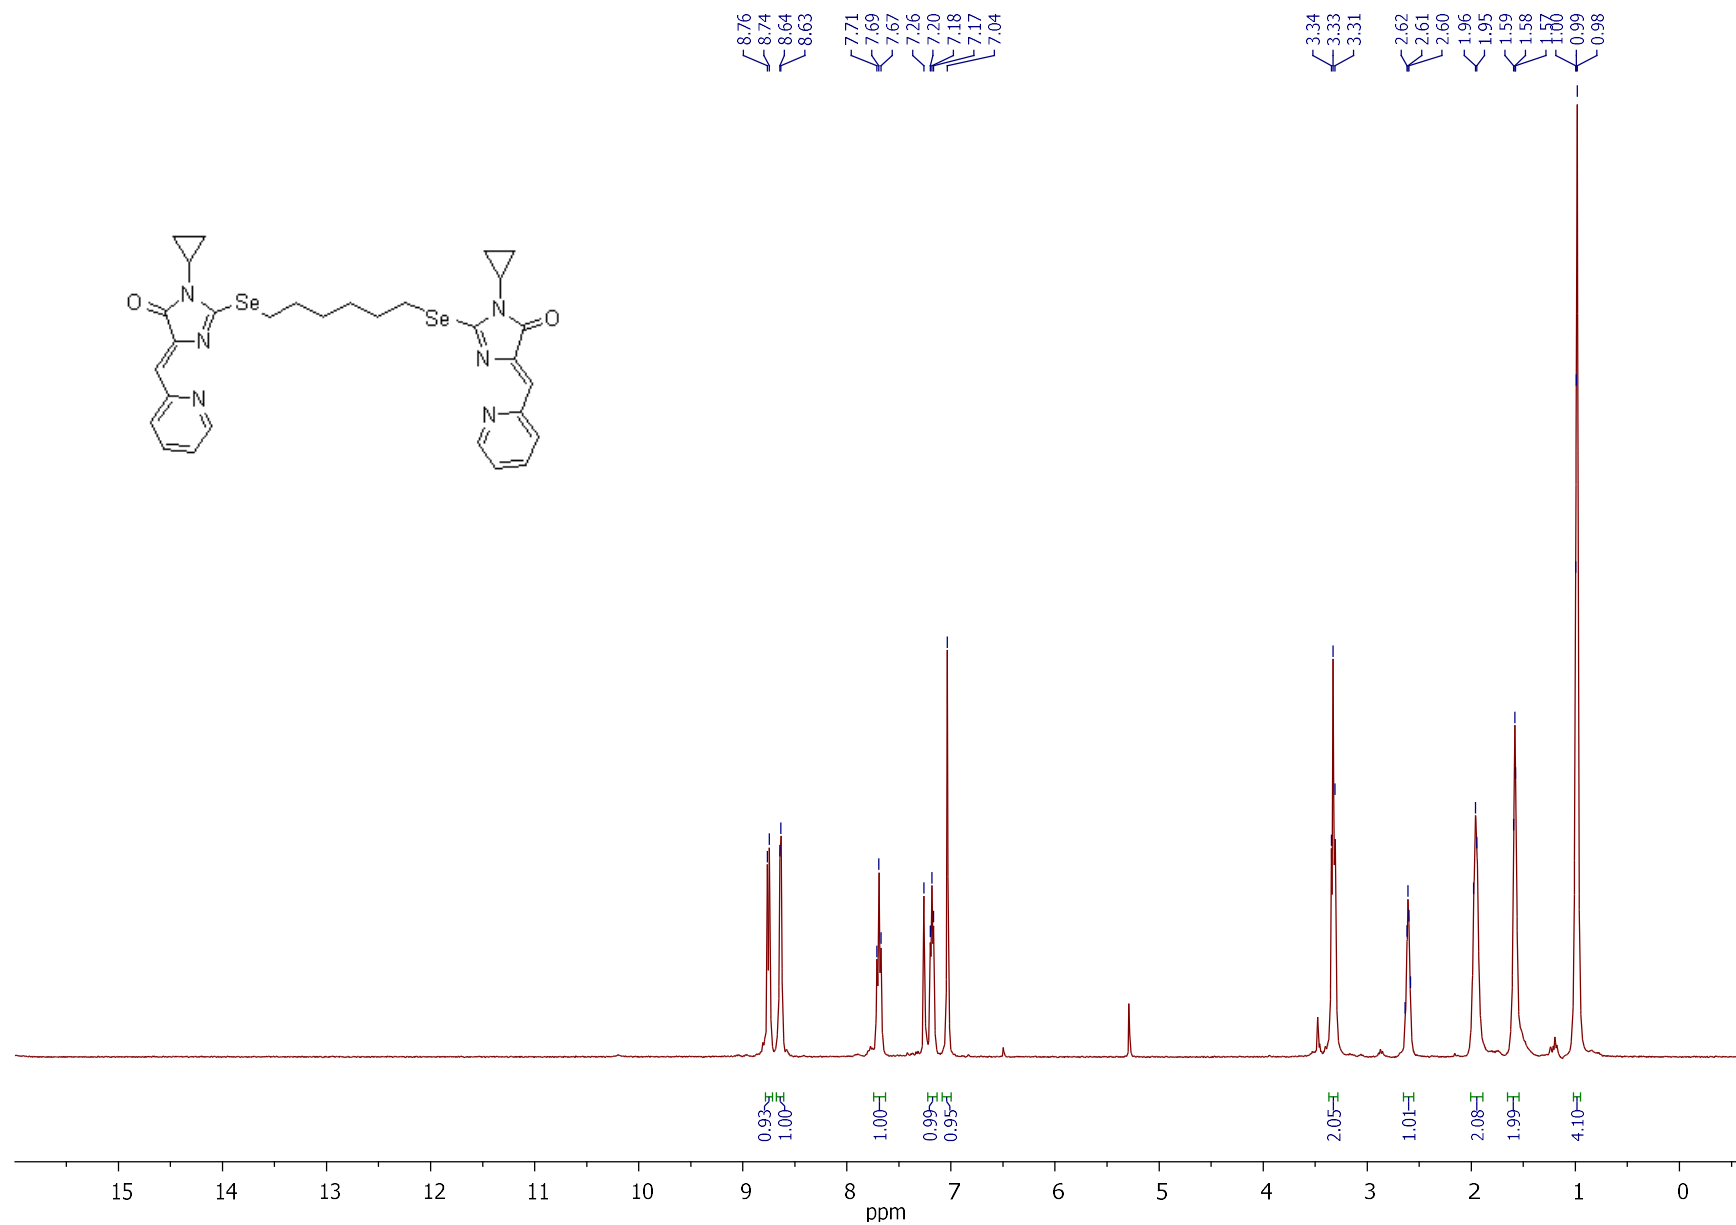

NMR  $^{13}\text{C}$  (4Z,4'Z)-2,2'-(hexane-1,6-diylbis(selanediyl))bis(1-cyclopropyl-4-(pyridin-2-ylmethylene)-1H-imidazol-5(4H)-one) (**4i**).

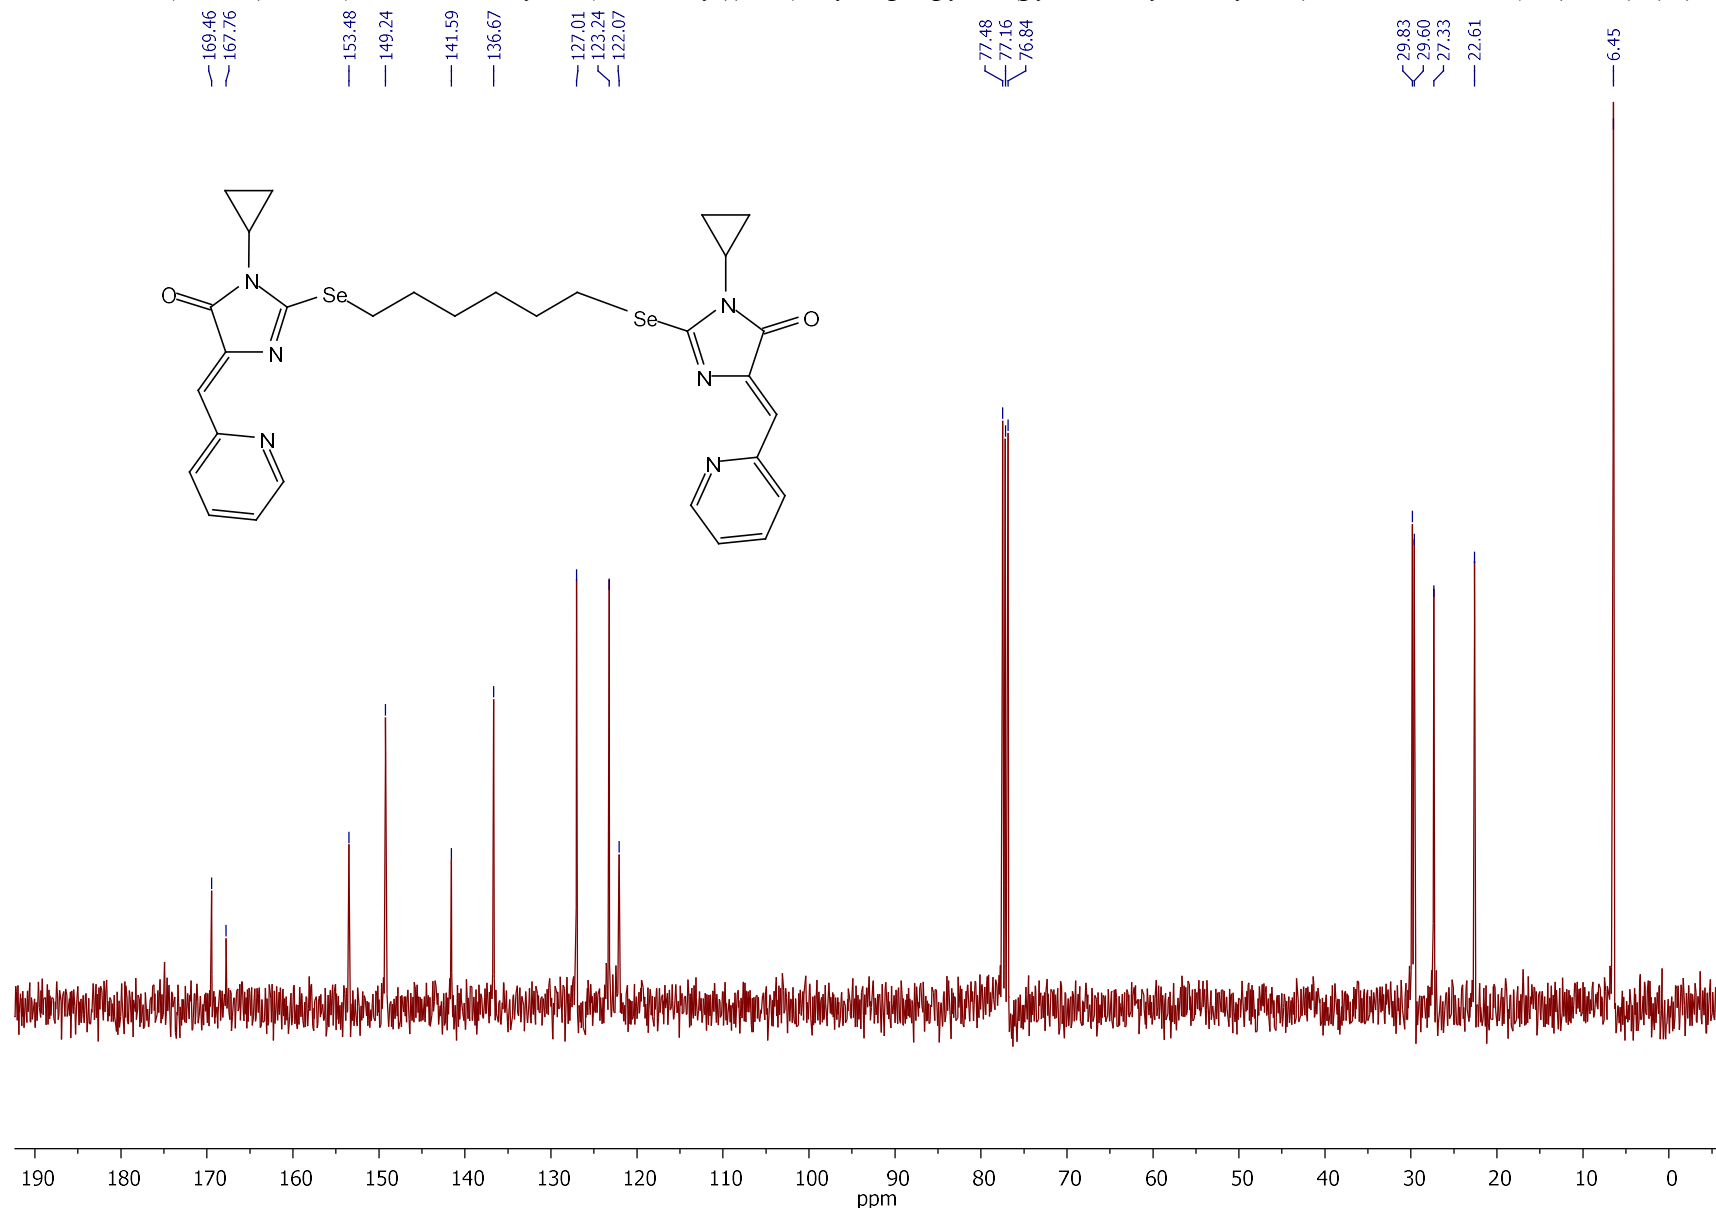

FTIR (4*Z*,4'*Z*)-2,2'-(hexane-1,6-diylbis(selenediyl))bis(1-cyclopropyl-4-(pyridin-2-ylmethylene)-1*H*-imidazol-5(4*H*)-one) (**4i**).

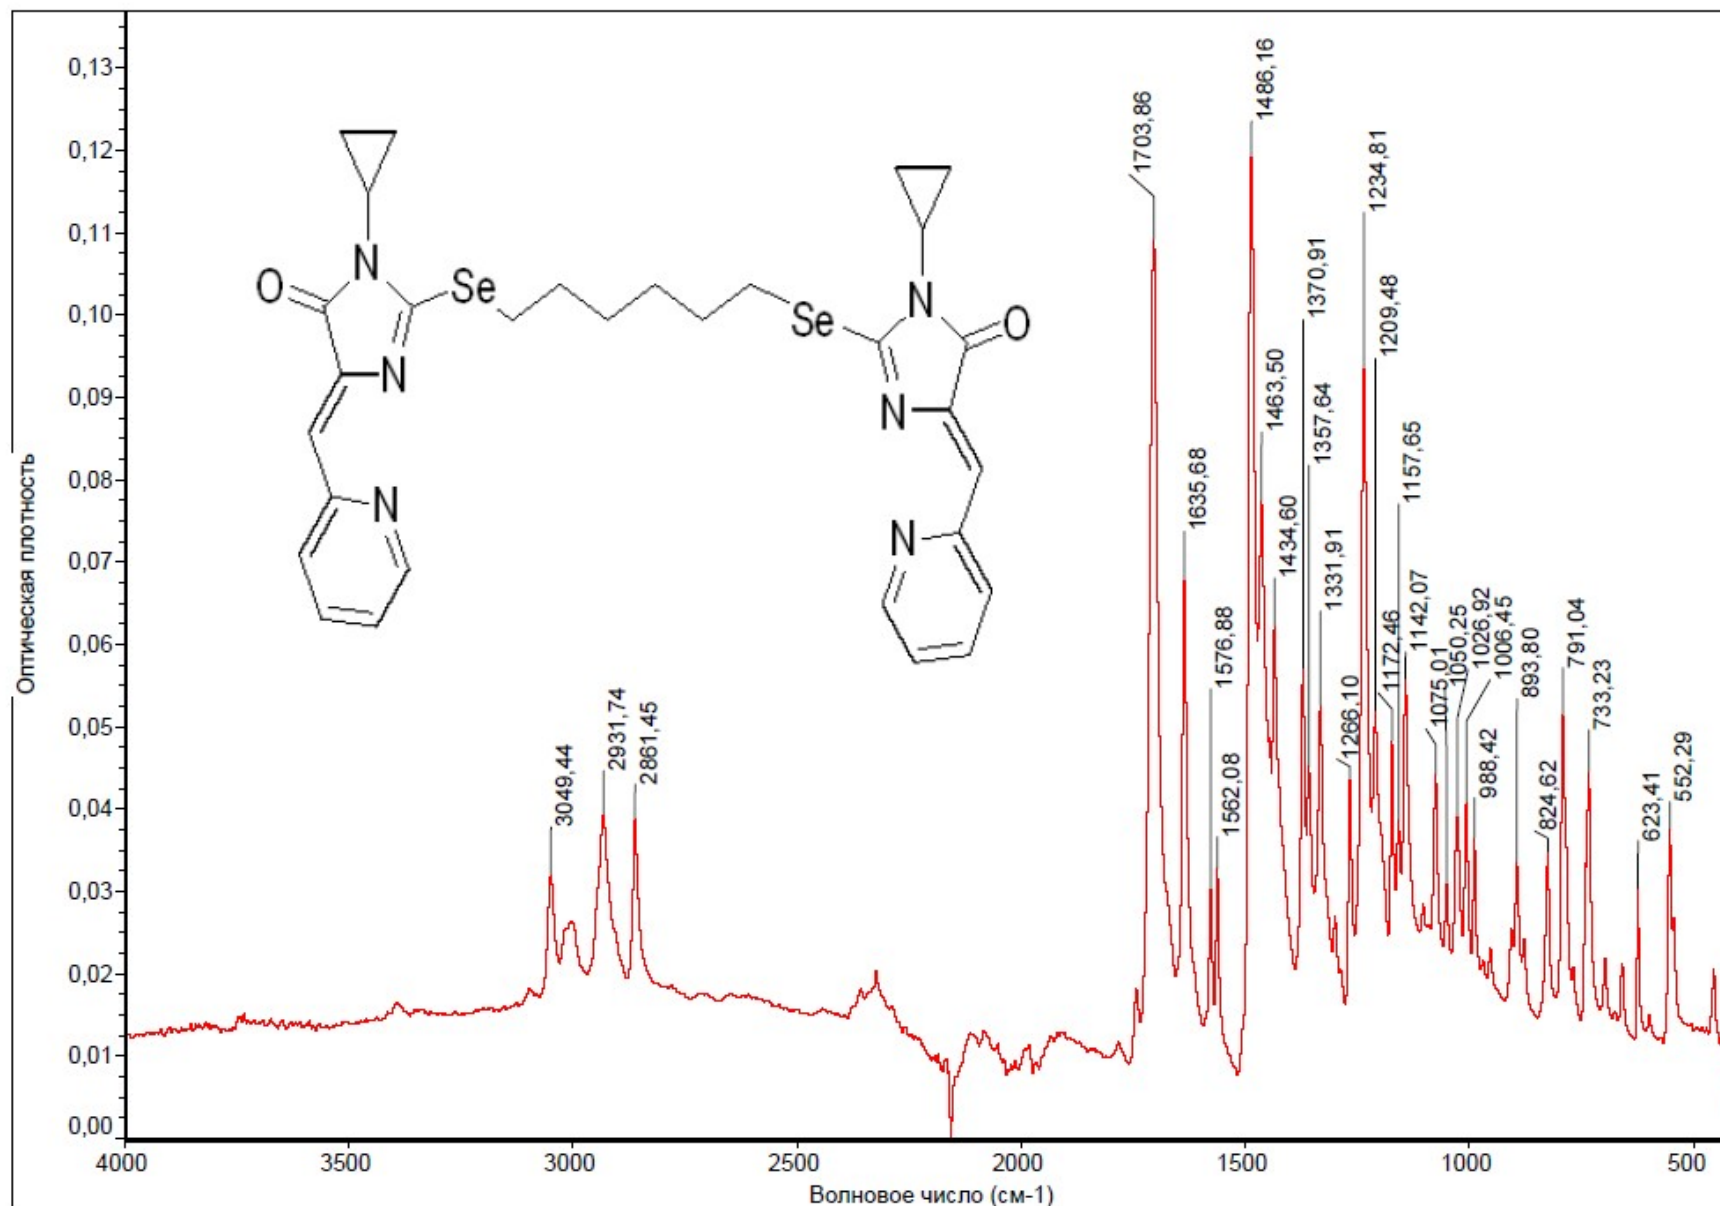

NMR  $^1\text{H}$  (4Z,4'Z)-2,2'-(decane-1,10-diylbis(selanediyl))bis(1-allyl-4-(pyridin-2-ylmethylene)-1H-imidazol-5(4H)-one) (**4j**).

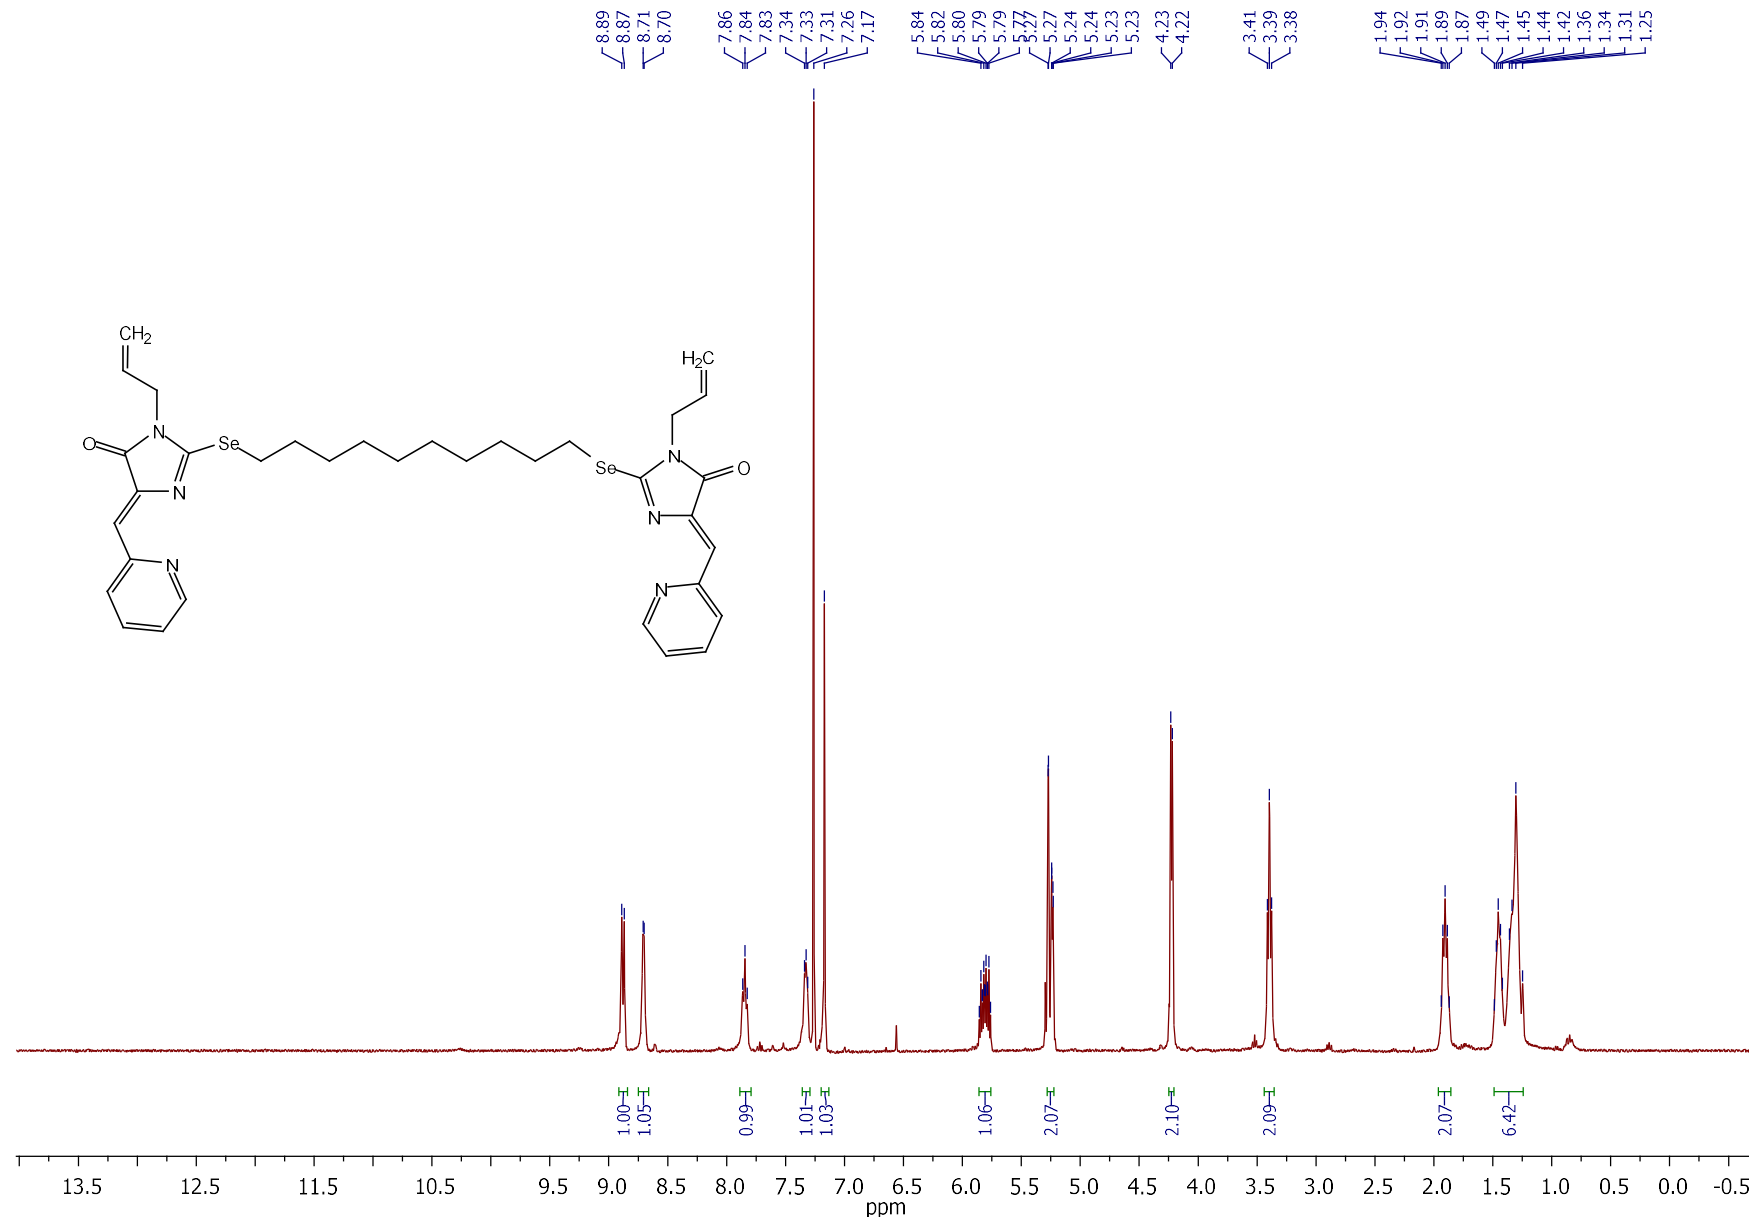

NMR  $^{13}\text{C}$  (4Z,4'Z)-2,2'-(decane-1,10-diylbis(selanediyl))bis(1-allyl-4-(pyridin-2-ylmethylene)-1H-imidazol-5(4H)-one) (**4j**).

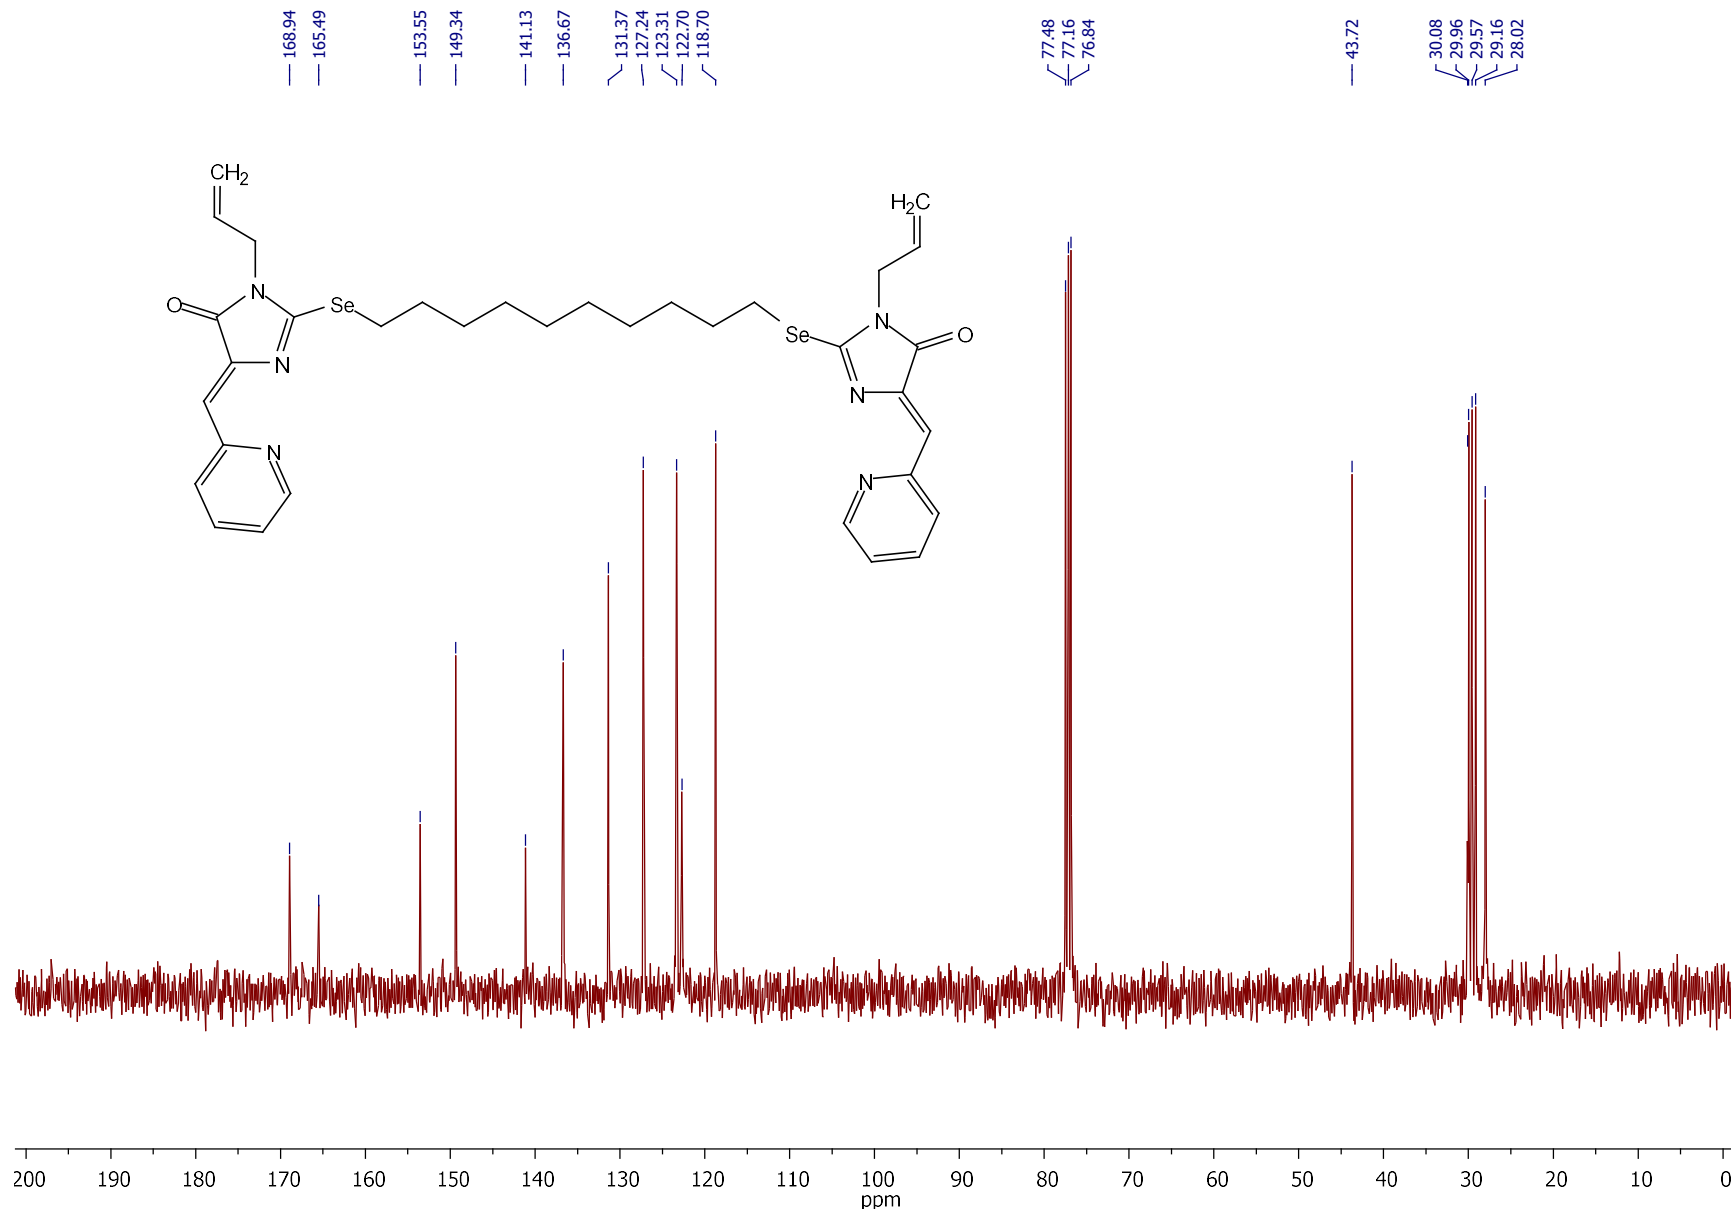

FTIR (4Z,4'Z)-2,2'-(decane-1,10-diylbis(selanediyl))bis(1-allyl-4-(pyridin-2-ylmethylene)-1H-imidazol-5(4H)-one) (**4j**).

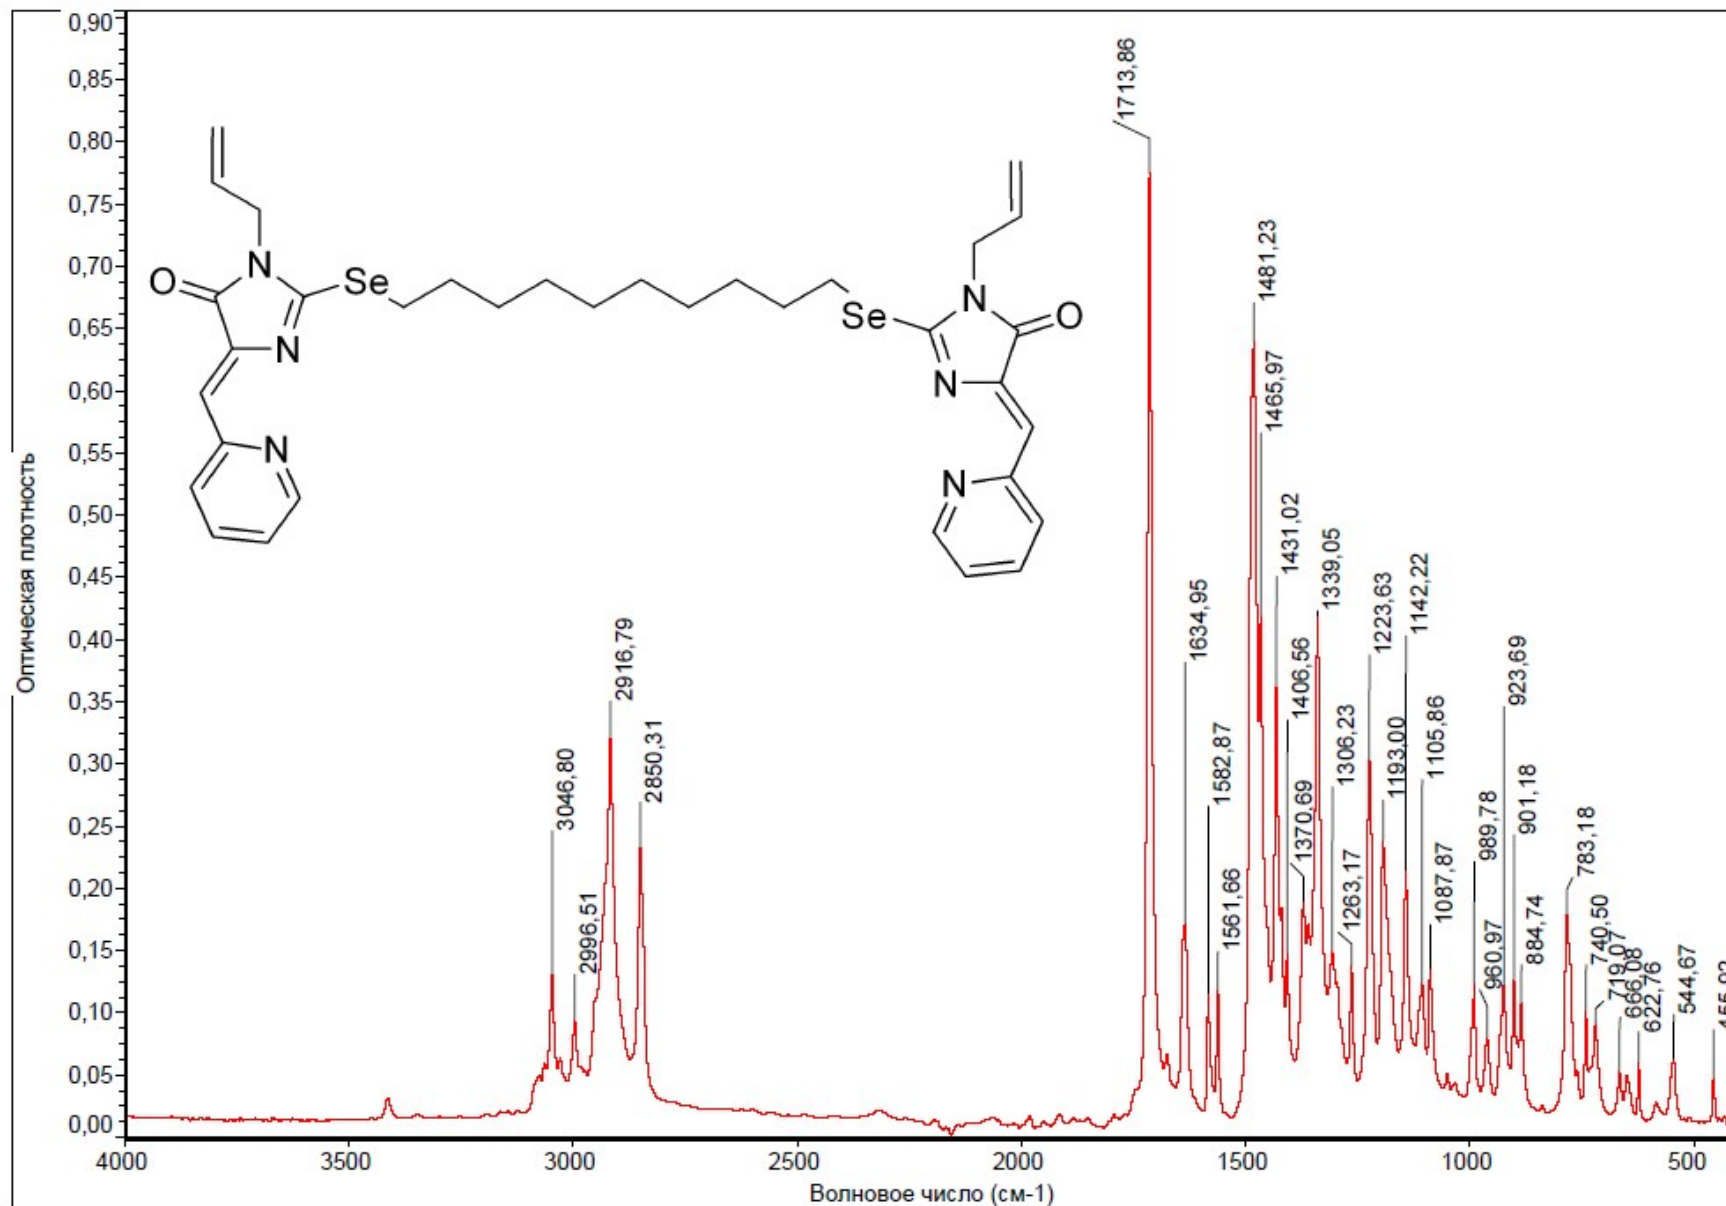



*NMR*  $^1\text{H}$ (4*Z*,4'*Z*)-2,2'-(decane-1,10-diylbis(selenediyl))bis(1-cyclopropyl-4-(pyridin-2-ylmethylene)-1*H*-imidazol-5(4*H*)-one) (**4k**).

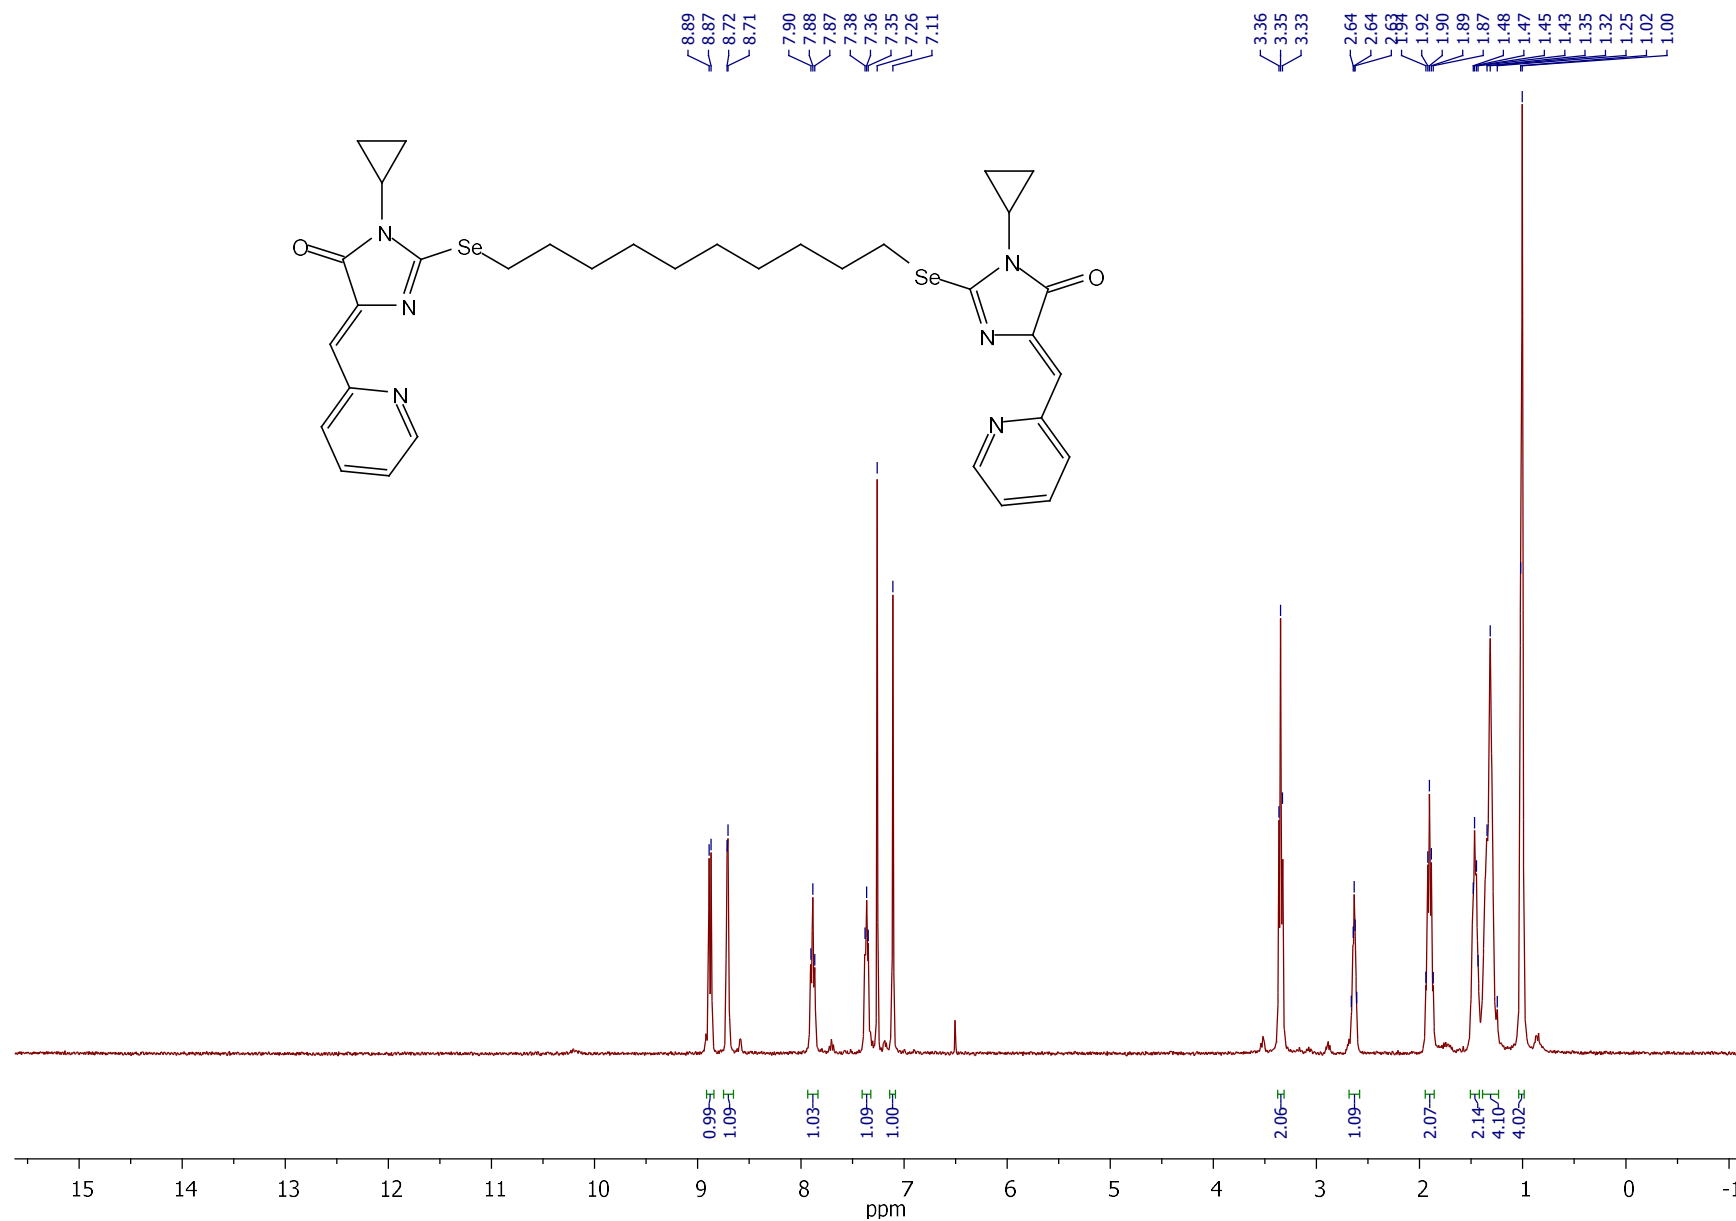

*NMR*  $^{13}\text{C}$  (4*Z*,4'*Z*)-2,2'-(decane-1,10-diylbis(selanediyl))bis(1-cyclopropyl-4-(pyridin-2-ylmethylene)-1*H*-imidazol-5(4*H*)-one) (**4k**).

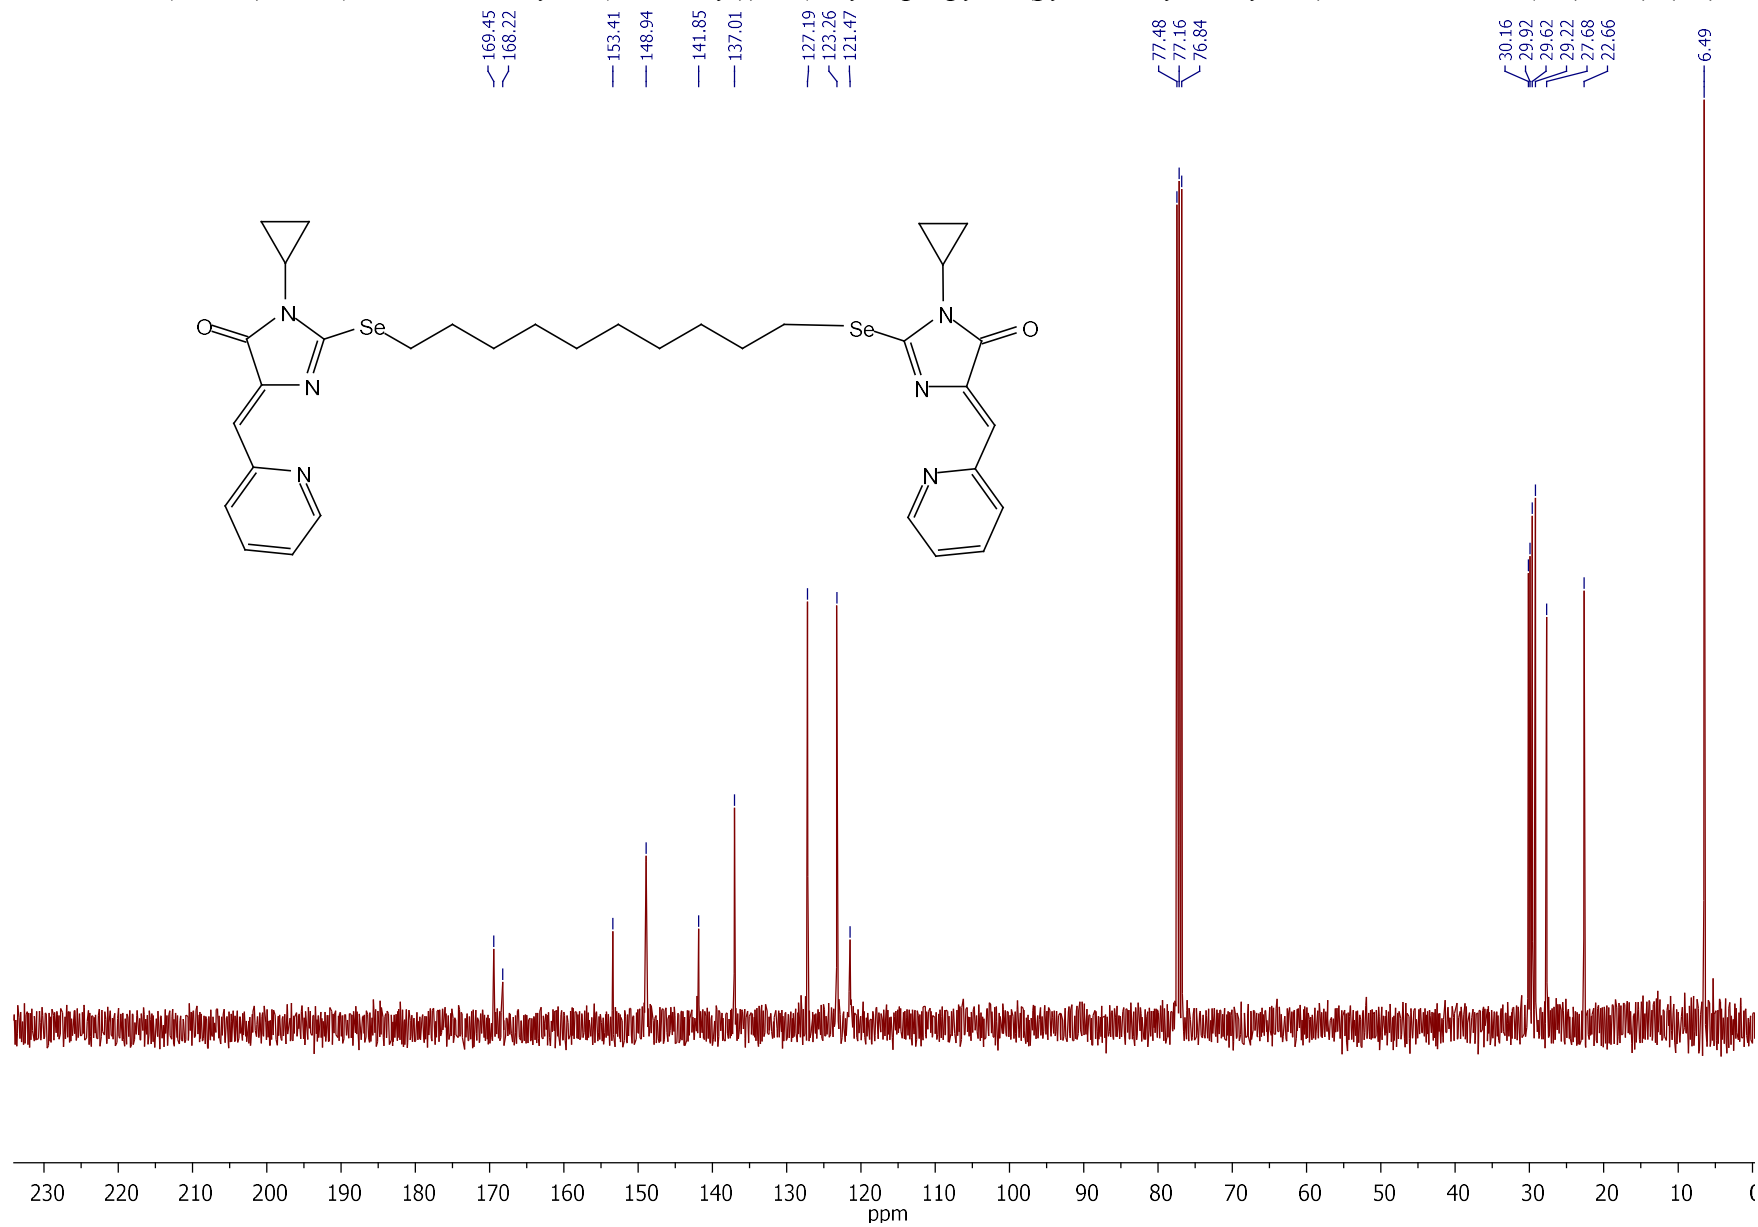

FTIR (4Z,4'Z)-2,2'-(decane-1,10-diylbis(selanediyl))bis(1-cyclopropyl-4-(pyridin-2-ylmethylene)-1H-imidazol-5(4H)-one) (**4k**).

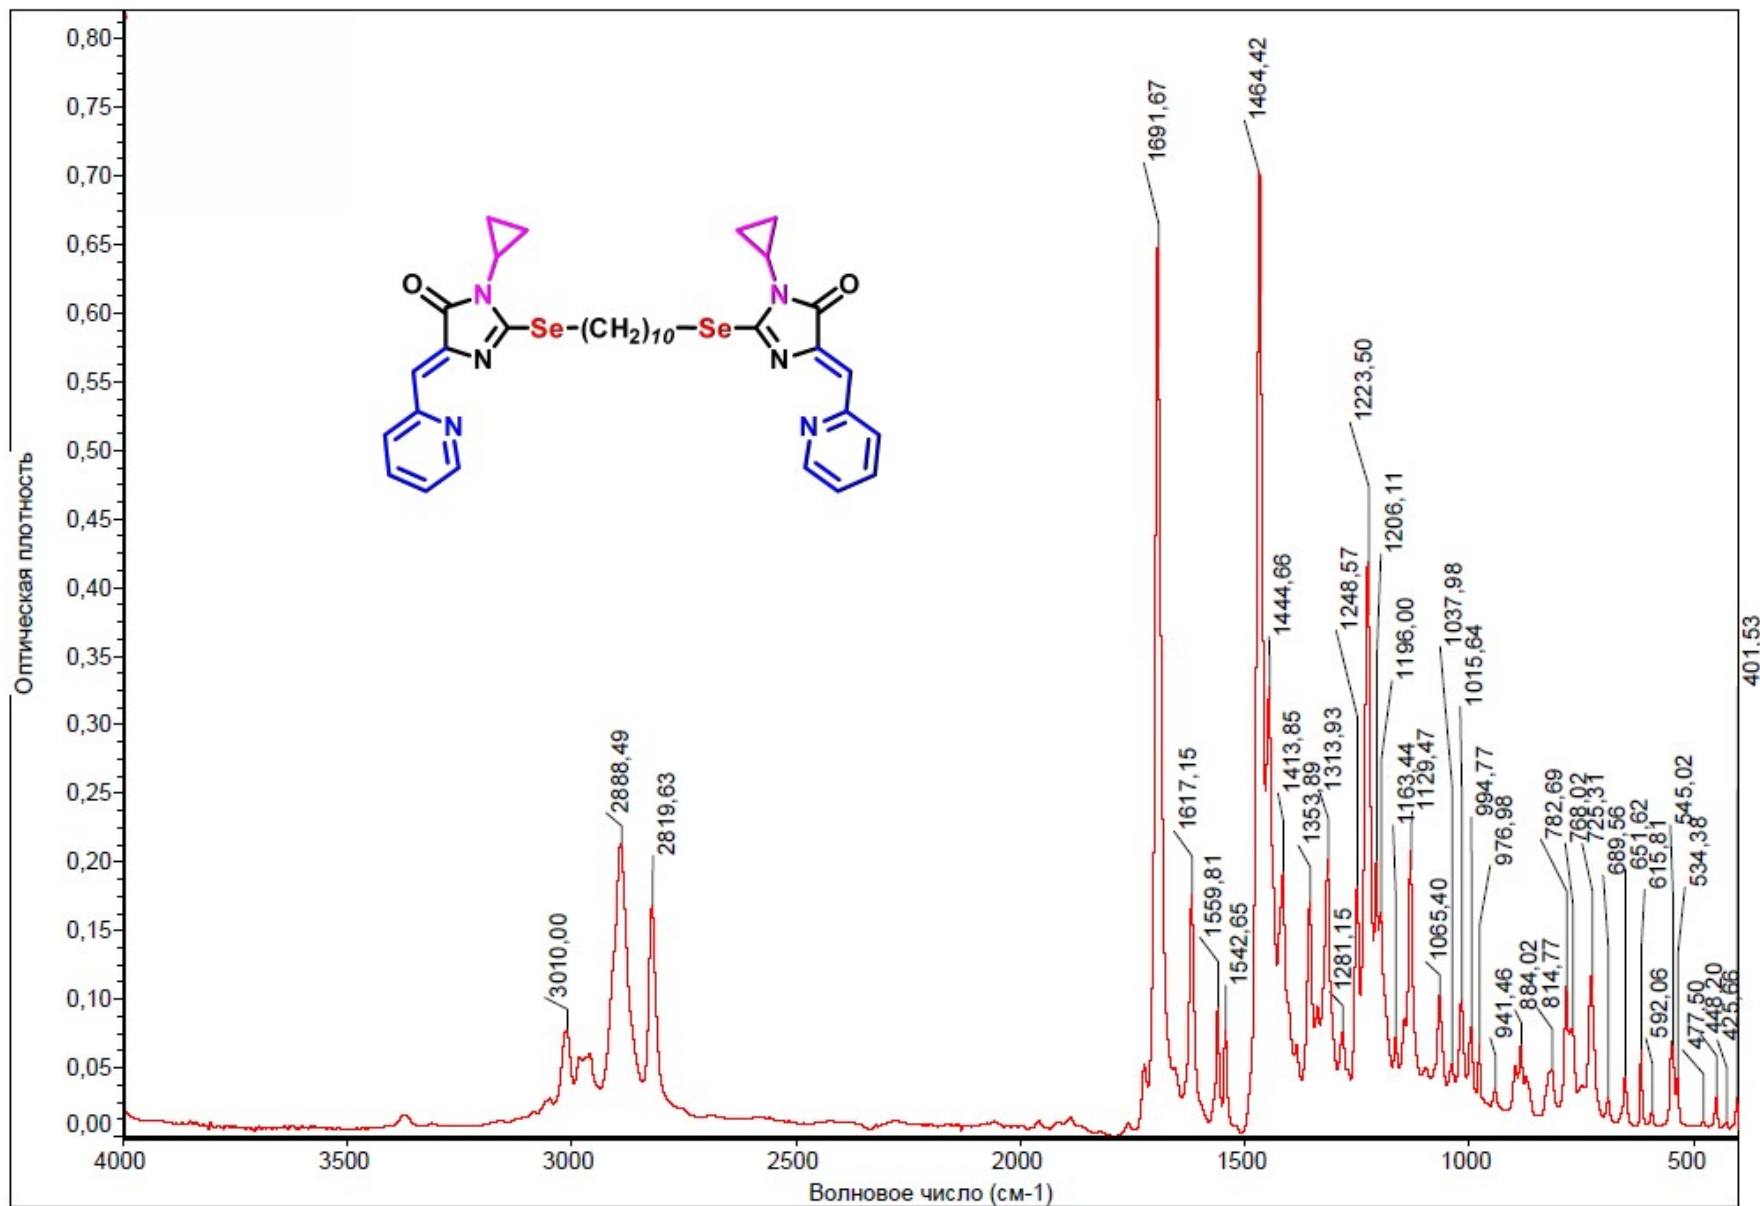

FTIR (4Z,4'Z)-2,2'-(Ethane-1,2-diylbis(selanediyl))bis(1-(4-ethoxyphenyl)-4-(pyridin-2-ylmethylene)-1H-imidazol-5(4H)-one)dicopper(I,II) trichloride (**5a**)

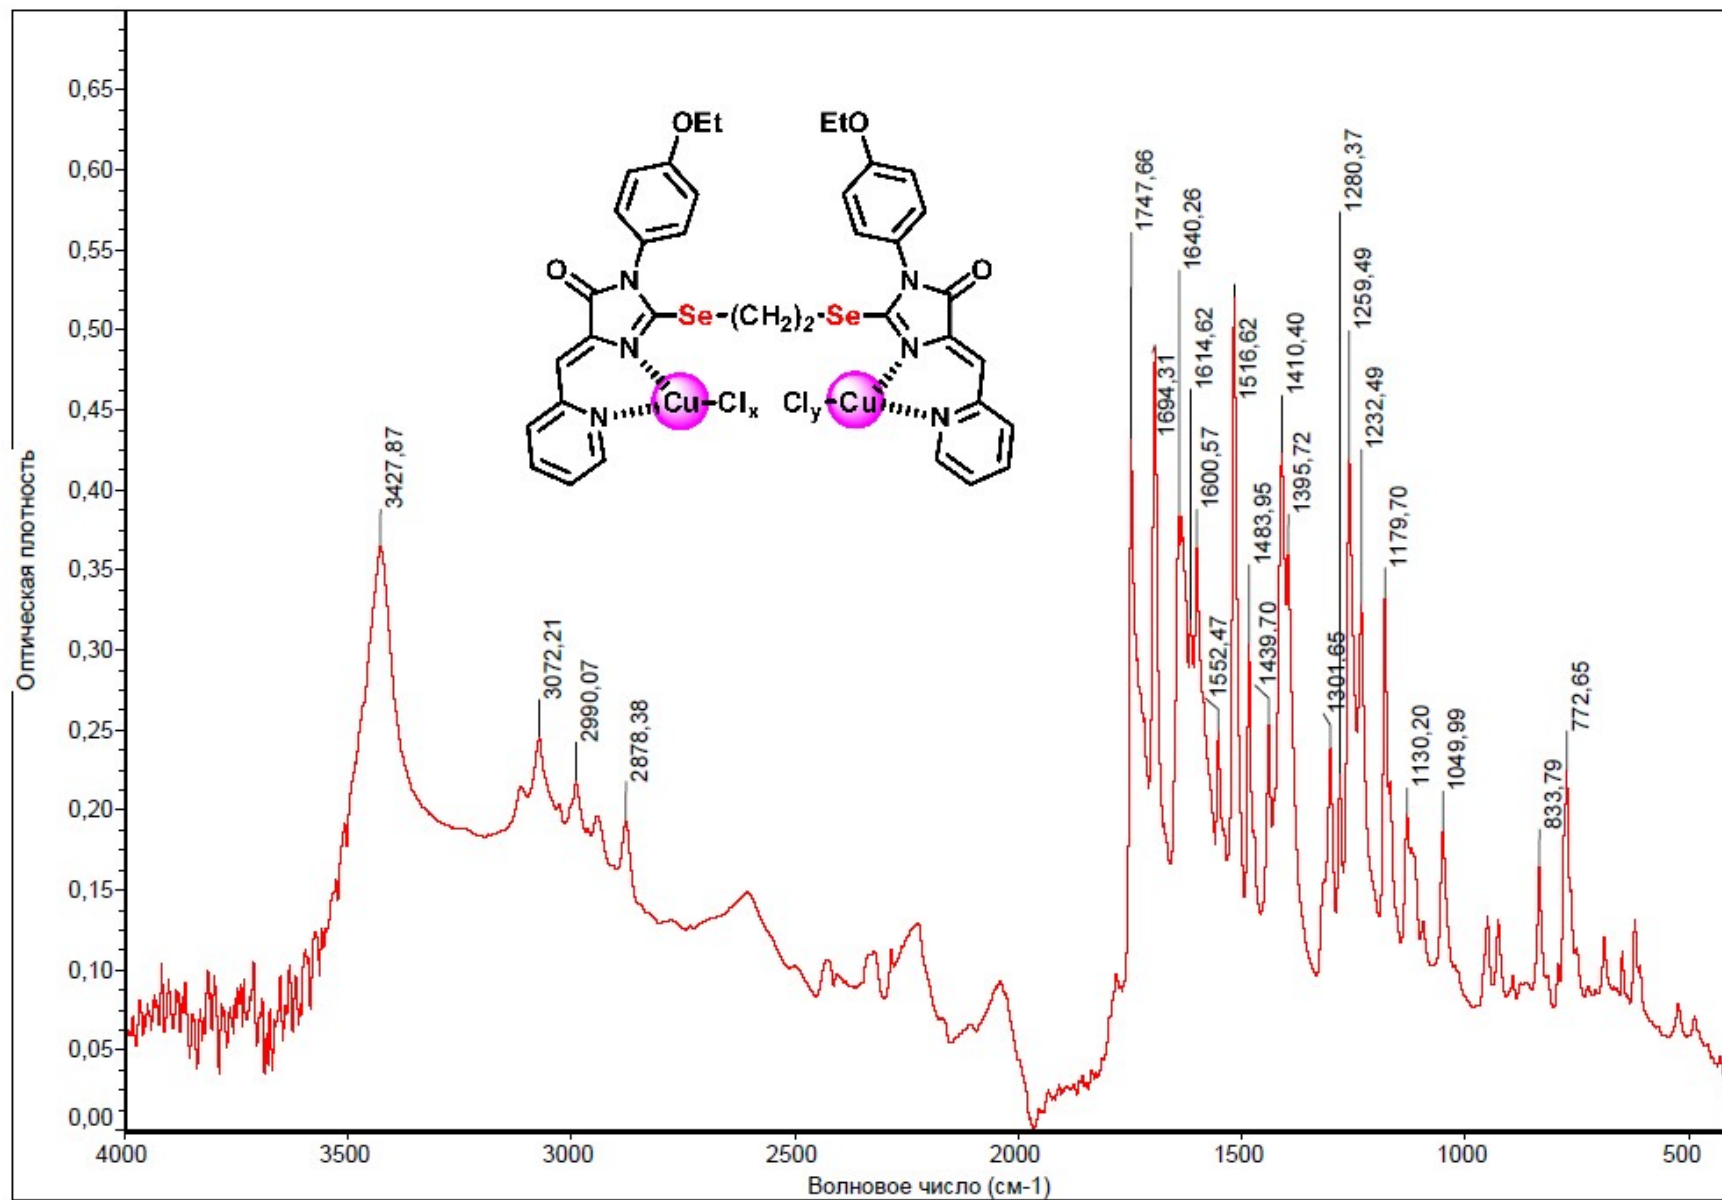

FTIR (4Z,4'Z)-2,2'-(Ethane-1,2-diylbis(selenediyl))bis(1-(4-cyanophenyl)-4-(pyridin-2-ylmethylene)-1H-imidazol-5(4H)-one)dicopper(I) dichloride (**5b**)

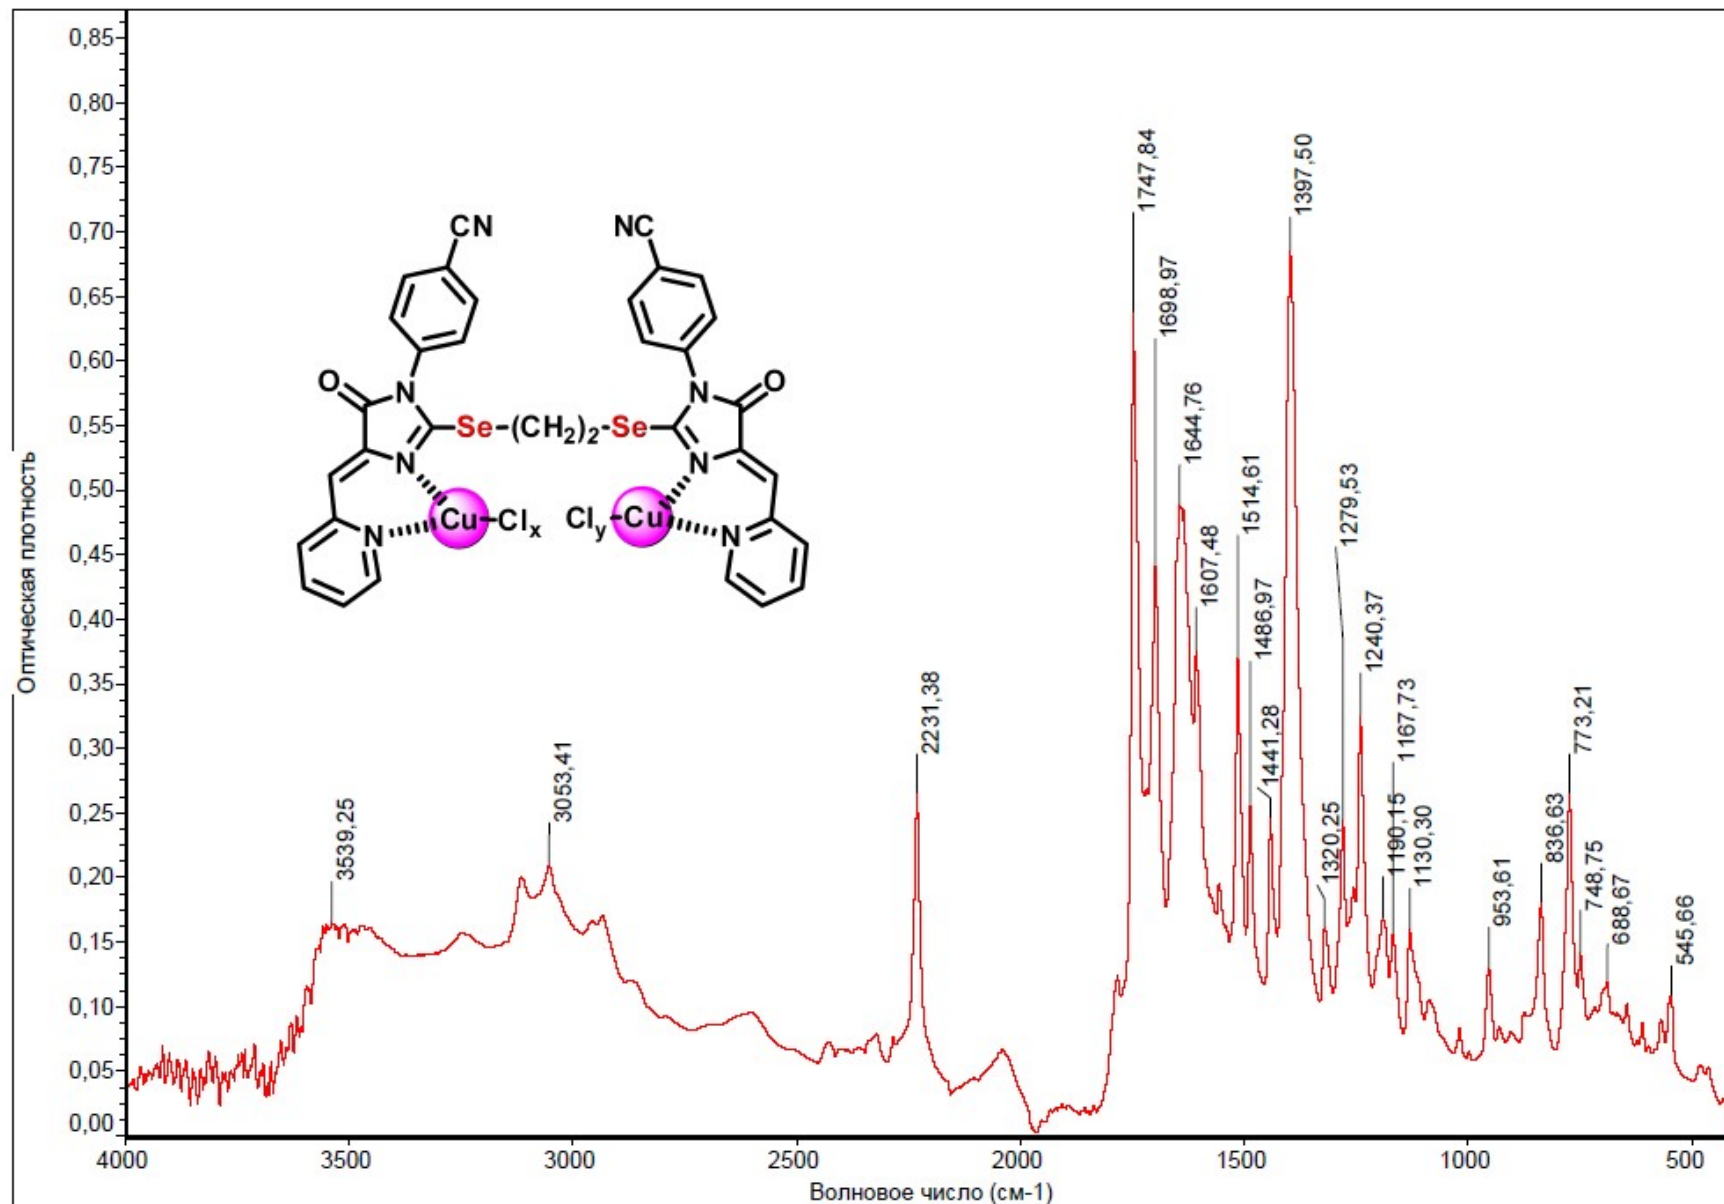

FTIR (4Z,4'Z)-2,2'-(Ethane-1,2-diylbis(selanediyl))bis(1-(4-allyl)-4-(pyridin-2-ylmethylene)-1H-imidazol-5(4H)-one)dicopper(I) dichloride (**5d**).

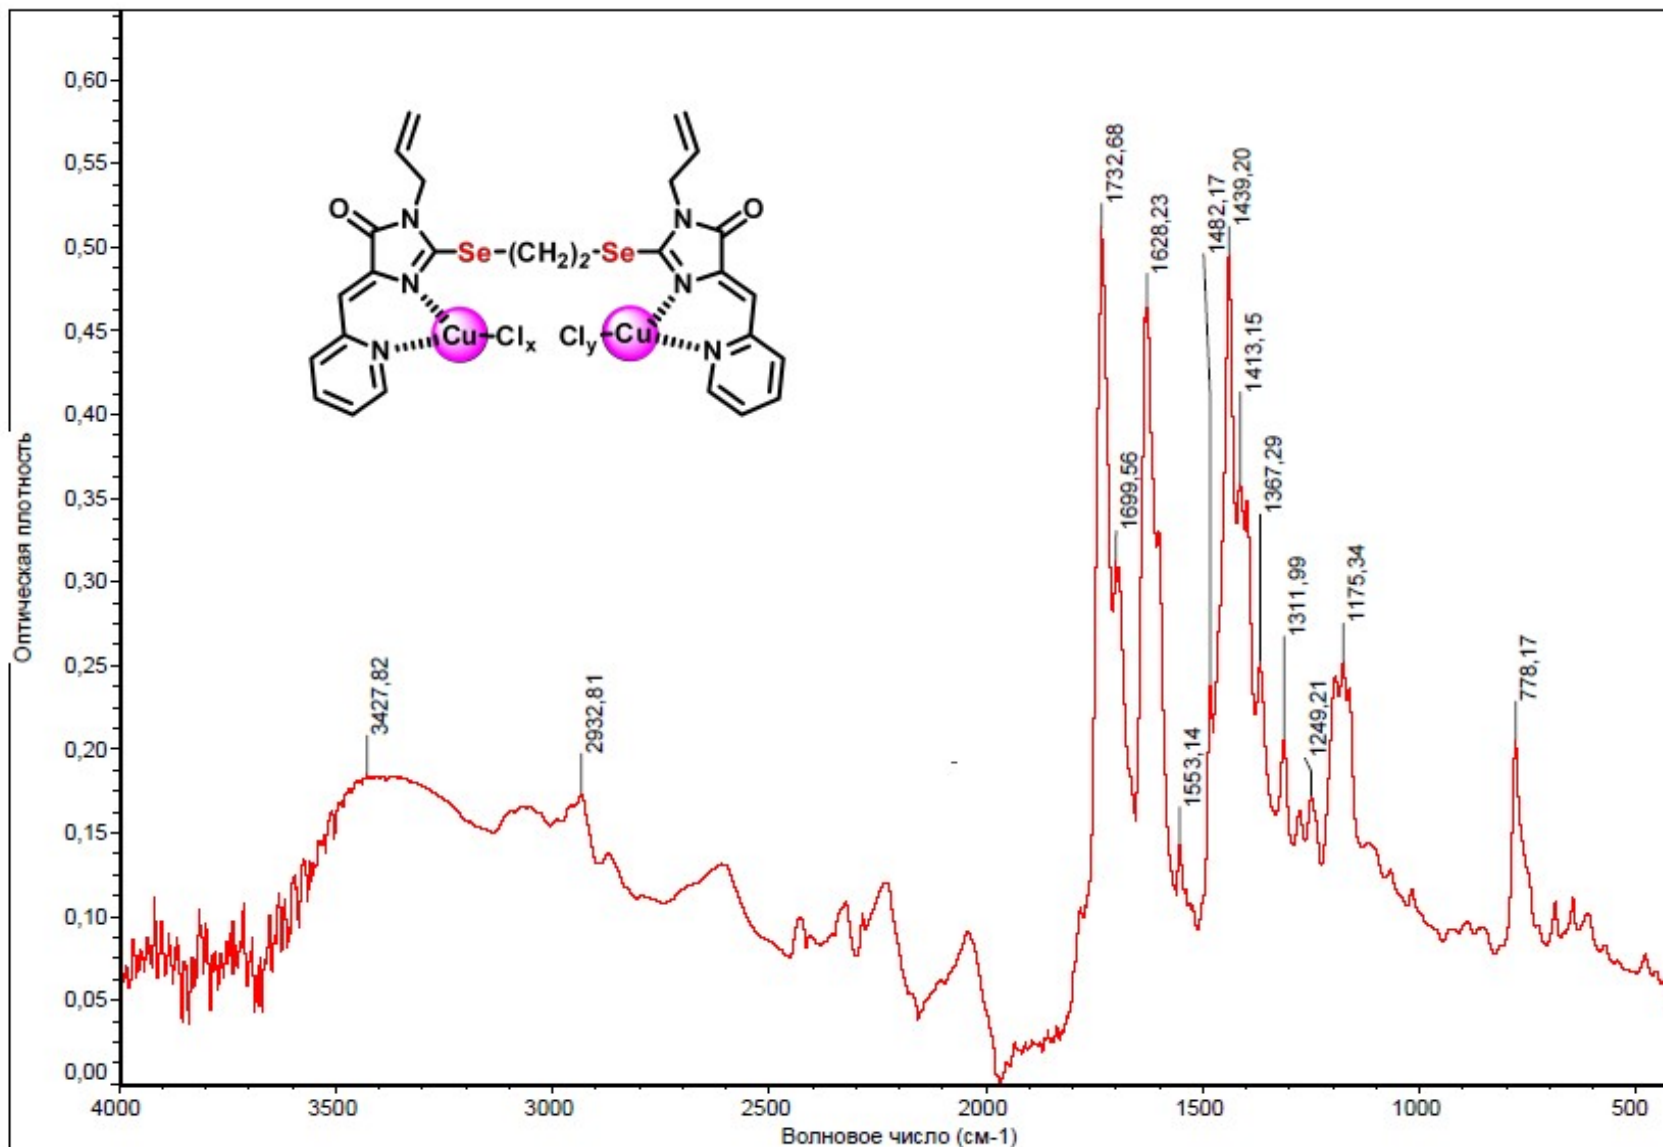

FTIR (4Z,4'Z)-2,2'-(Ethane-1,2-diylbis(selanediyl))bis(1-(4-cyclopropyl)-4-(pyridin-2-ylmethylene)-1H-imidazol-5(4H)-one)dicopper(I,II) trichloride (**5e**).

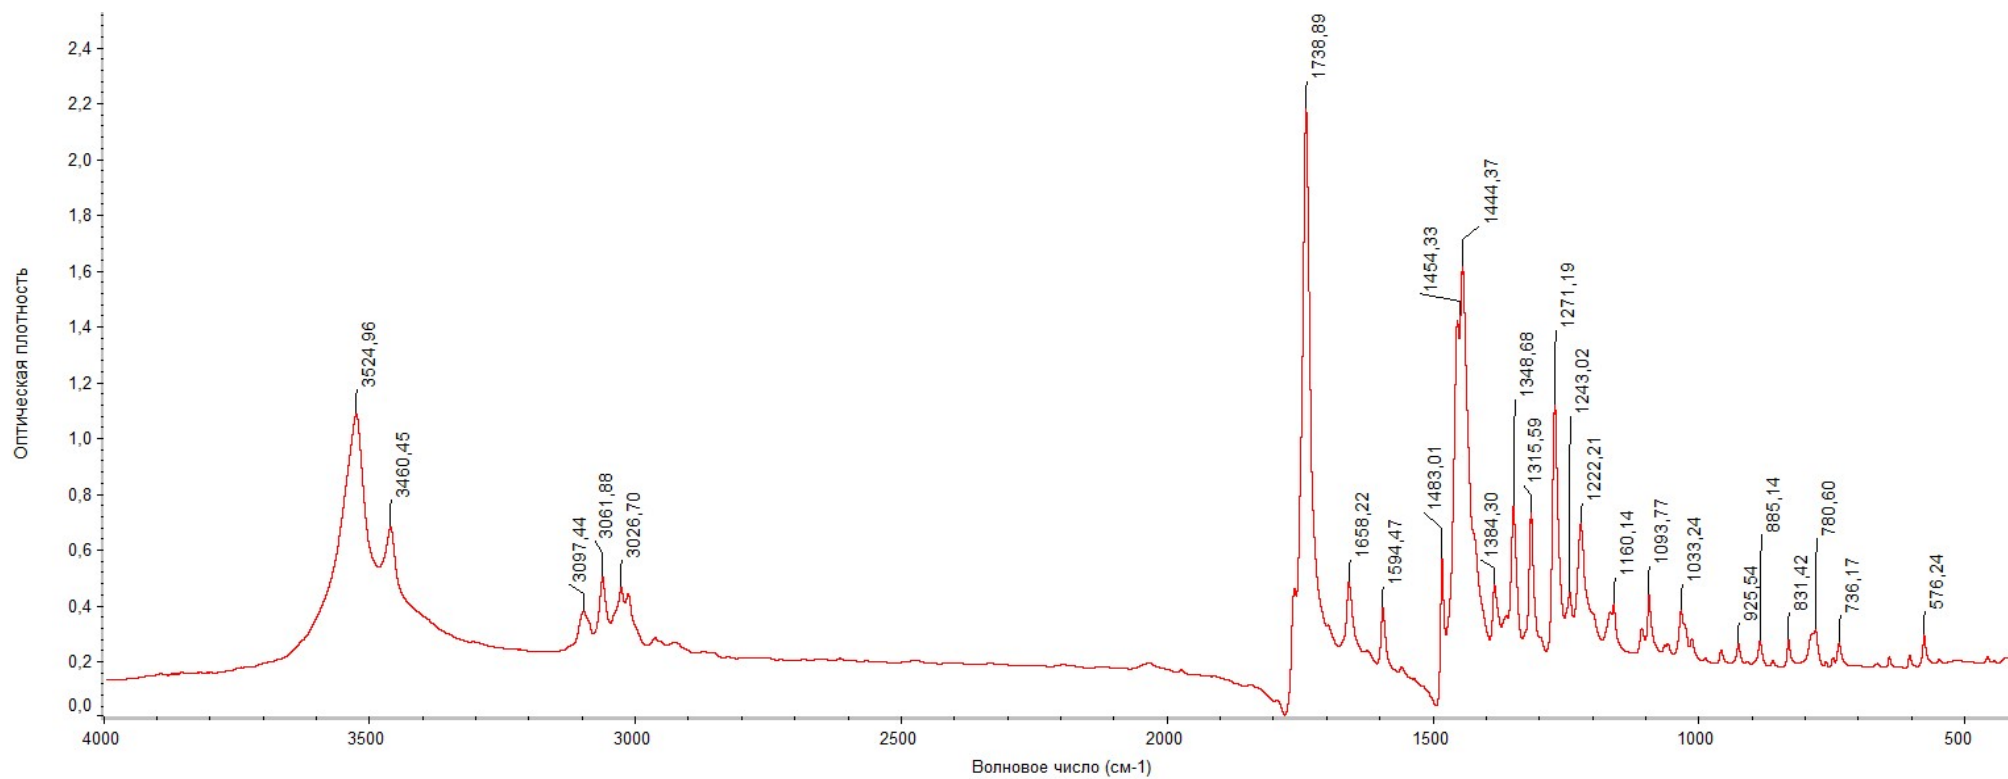

FTIR (4Z,4'Z)-2,2'-(butane-1,4-diylbis(selanediyl))bis(1-allyl-4-(pyridin-2-ylmethylene)-1H-imidazol-5(4H)-one)dicopper(I,II) trichloride (**5f**).

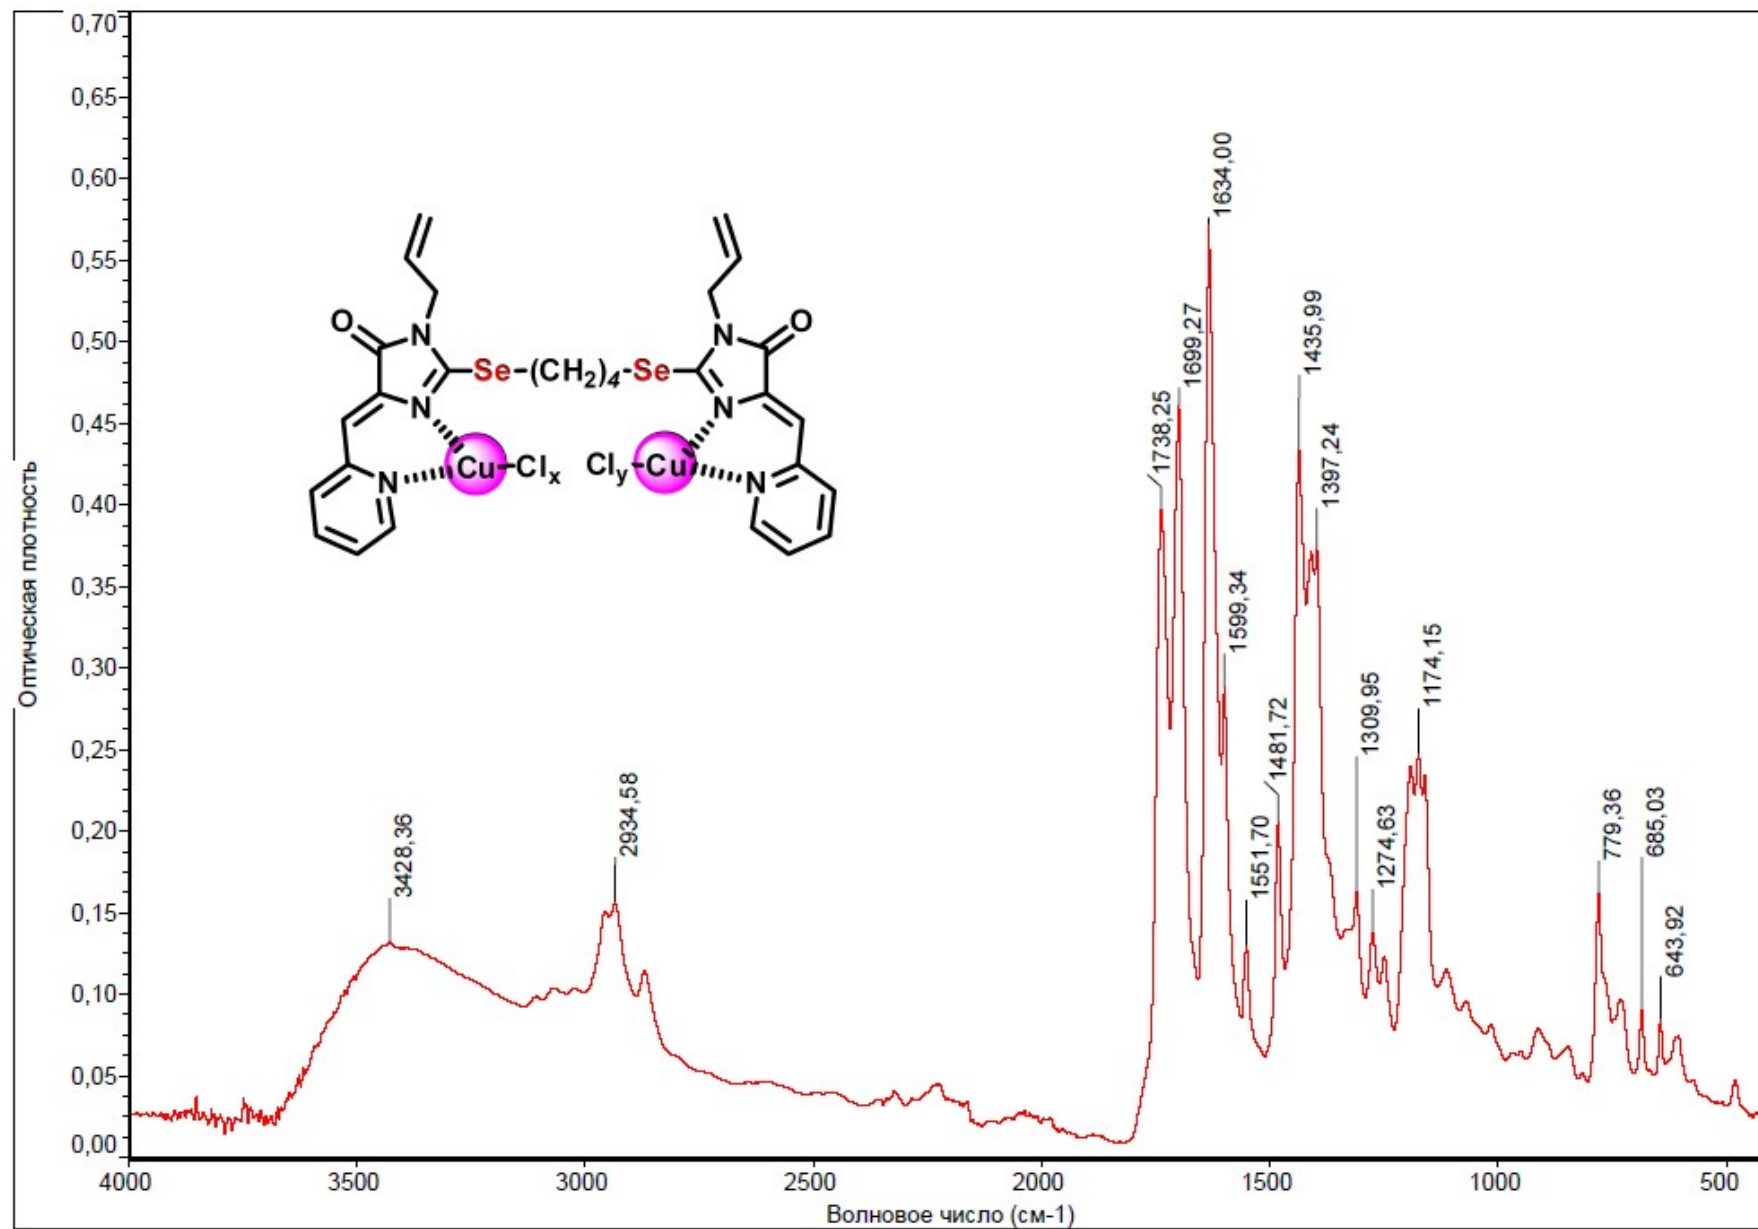



FTIR (4Z,4'Z)-2,2'-(hexane-1,6-diylbis(selenediyl))bis(1-allyl-4-(pyridin-2-ylmethylene)-1H-imidazol-5(4H)-one)dicopper(I,II) trichloride (**5h**).

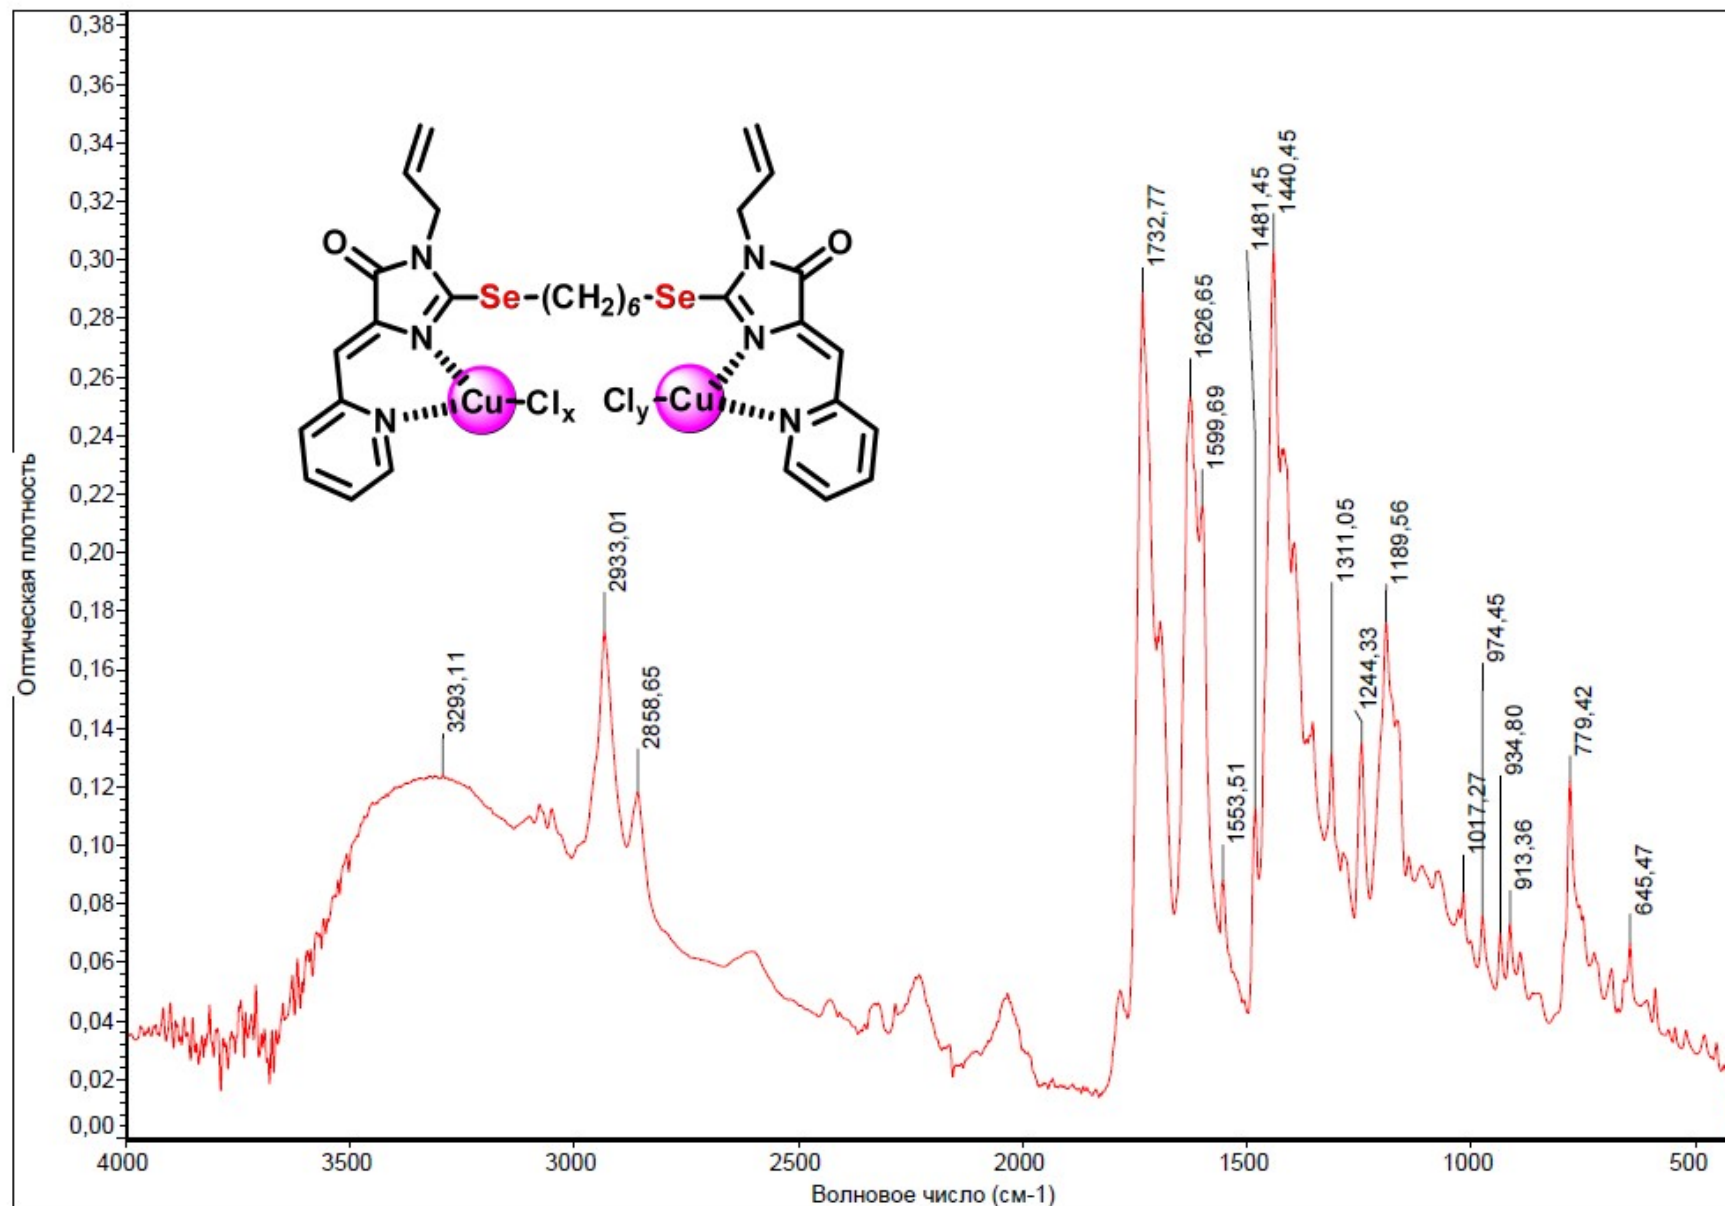

FTIR (4*Z*,4'*Z*)-2,2'-(hexane-1,6-diylbis(selanediyl))bis(1-cyclopropyl-4-(pyridin-2-ylmethylene)-1*H*-imidazol-5(4*H*)-one)dicopper(II) tetrachloride (**5i**).

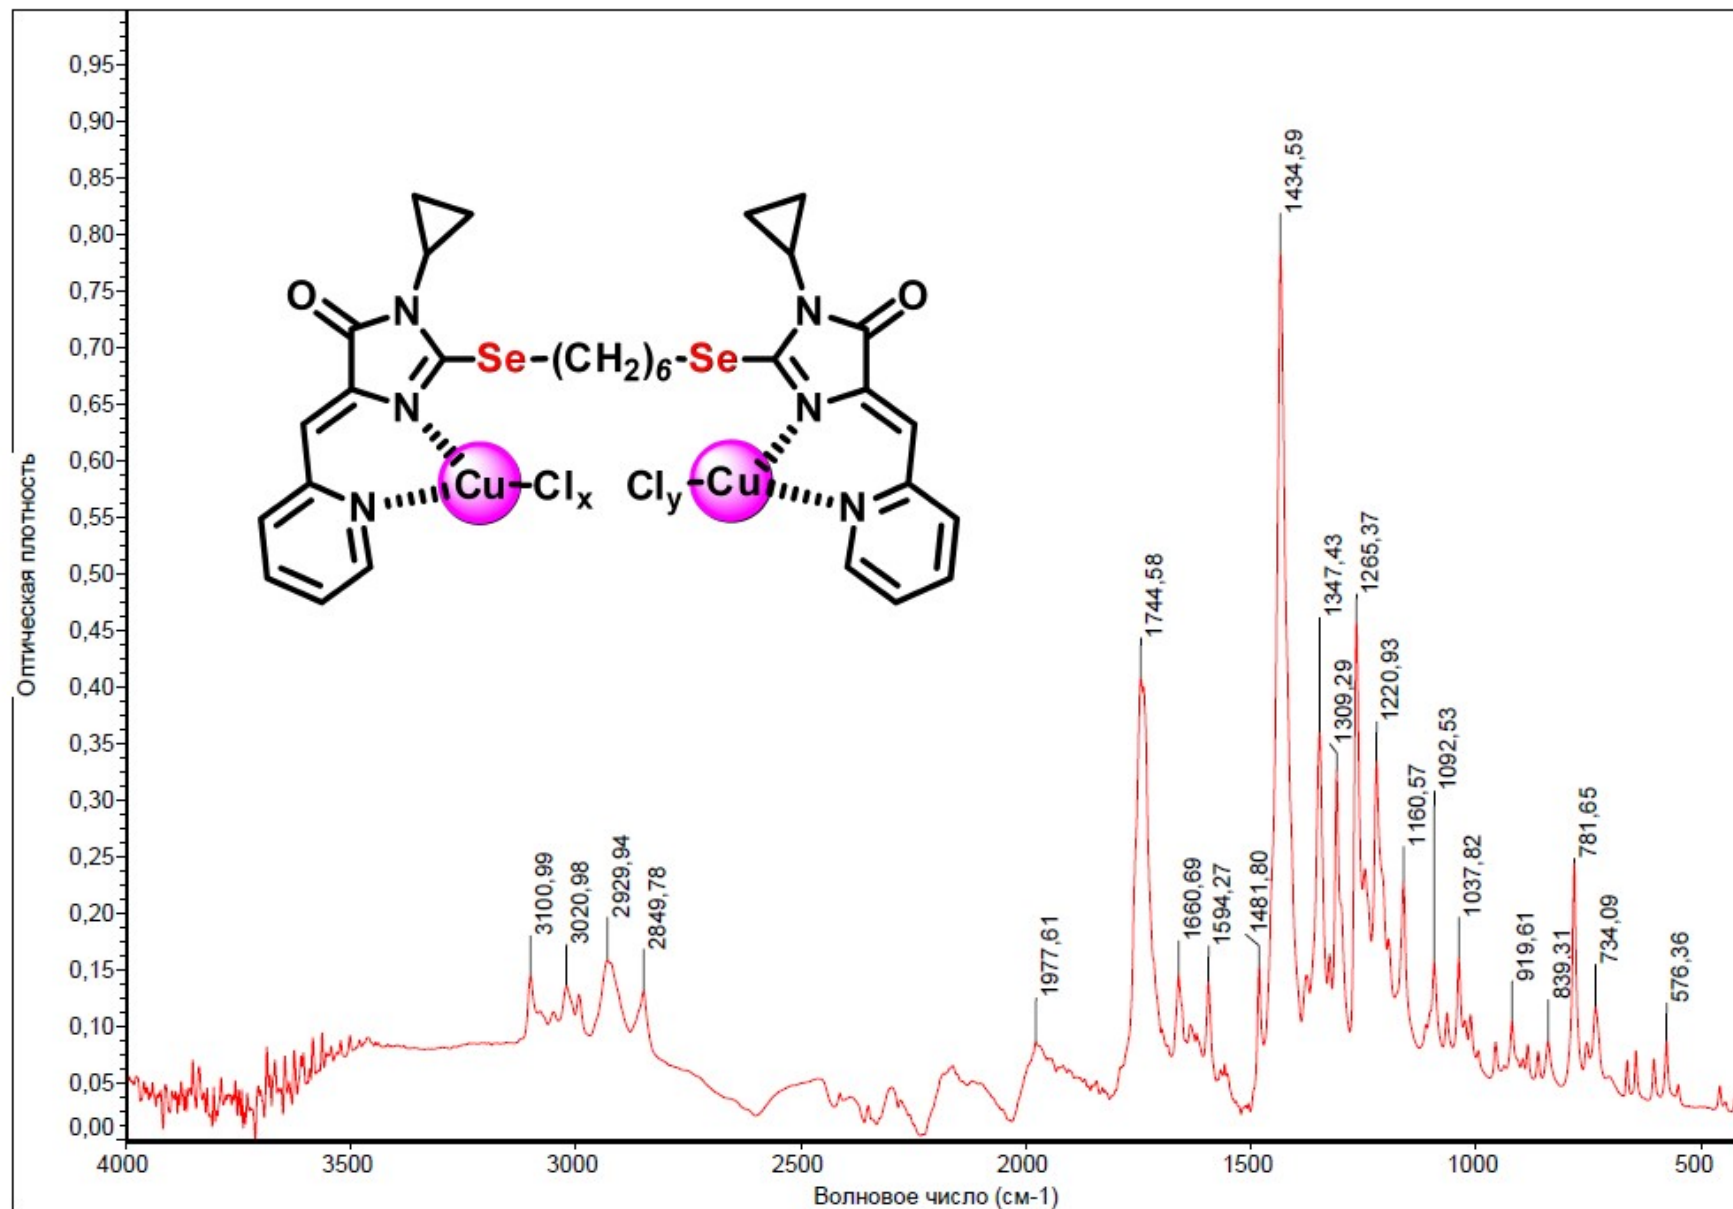

FTIR (4Z,4'Z)-2,2'-(decane-1,10-diylbis(selanediyl))bis(1-cyclopropyl-4-(pyridin-2-ylmethylene)-1H-imidazol-5(4H)-one)dicopper(I,II) trichloride (**5k**).

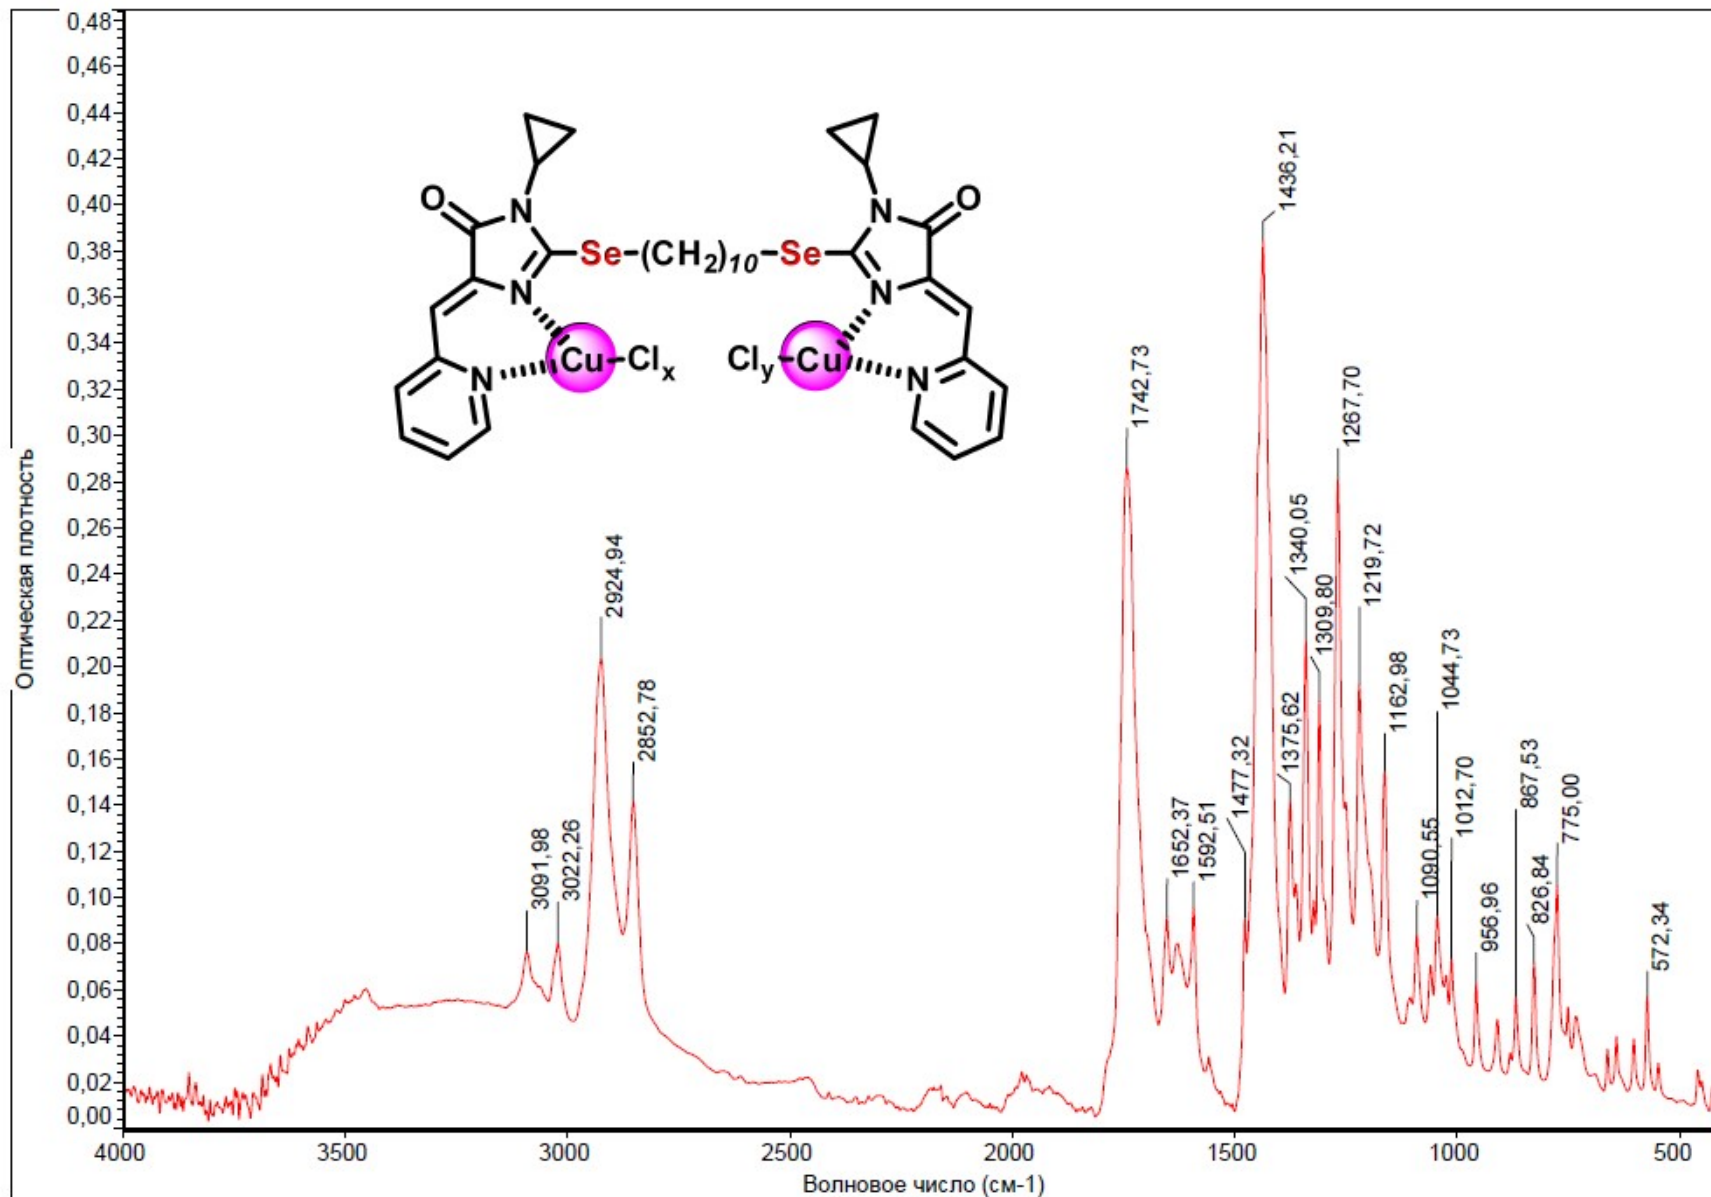

FTIR (4Z,4'Z)-2,2'-(Ethane-1,2-diylbis(selenediyl))bis(1-(4-allyl)-4-(pyridin-2-ylmethylene)-1H-imidazol-5(4H)-one)copper(II) diperchlorate (**6e**)

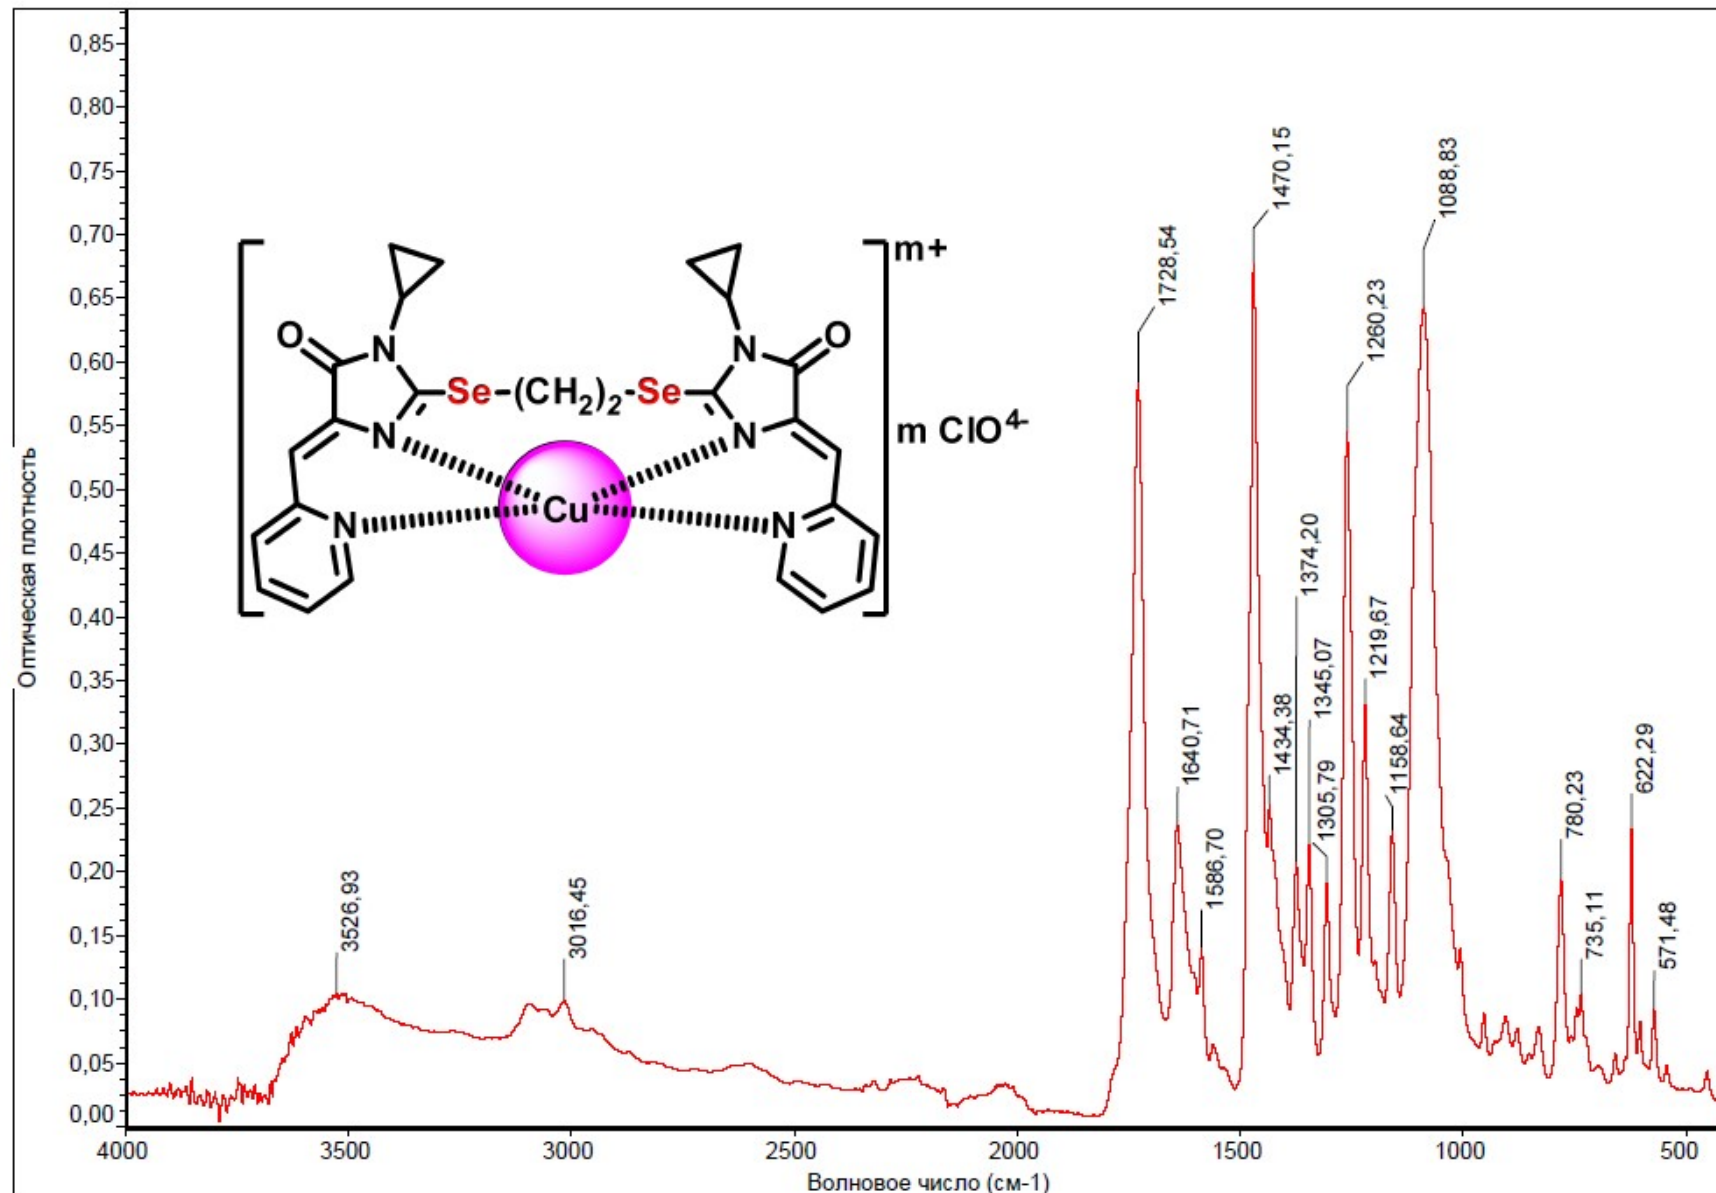

FTIR (4Z,4'Z)-2,2'-(butane-1,4-diylbis(selanediyl))bis(1-cyclopropyl-4-(pyridin-2-ylmethylene)-1H-imidazol-5(4H)-one)copper(II) diperchlorate (**6g**).

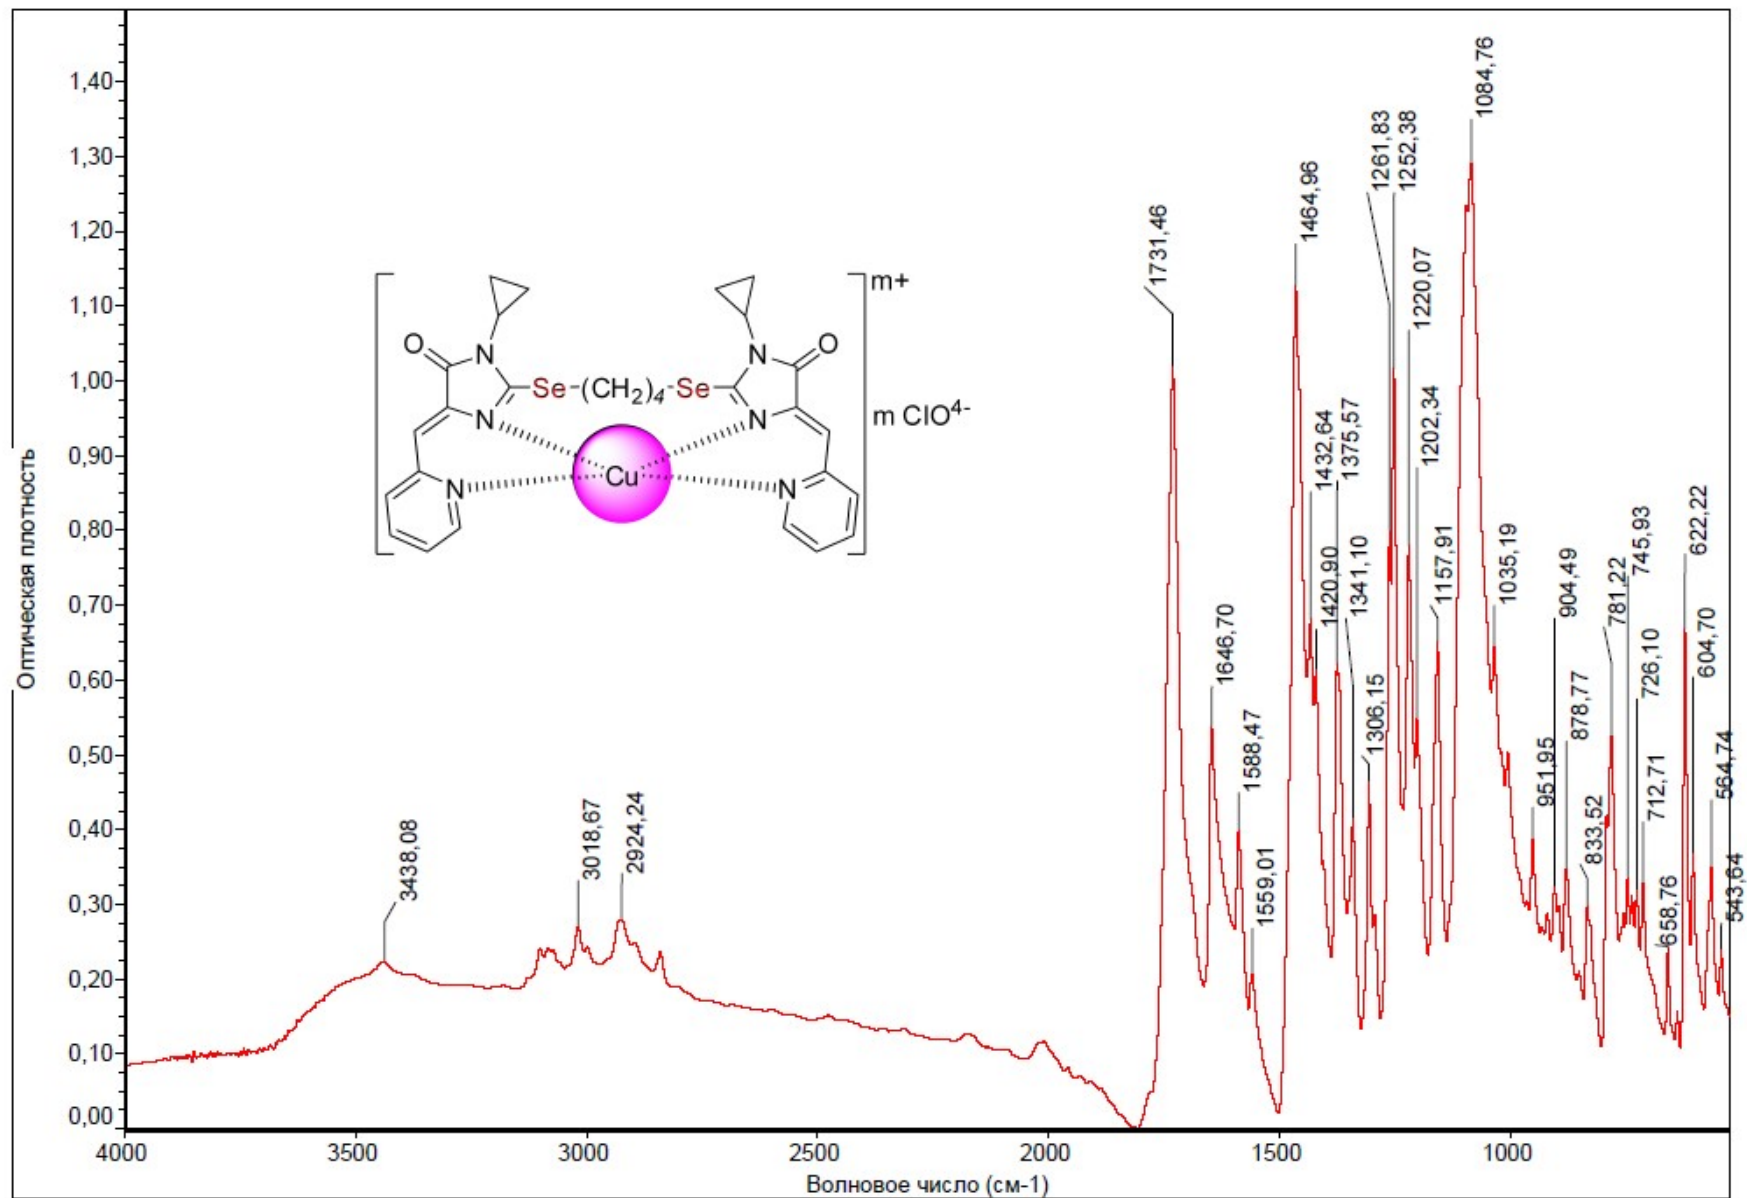

FTIR (4Z,4'Z)-2,2'-(hexane-1,6-diylbis(selanediyl))bis(1-allyl-4-(pyridin-2-ylmethylene)-1H-imidazol-5(4H)-one)copper(II) diperchlorate (**6h**).

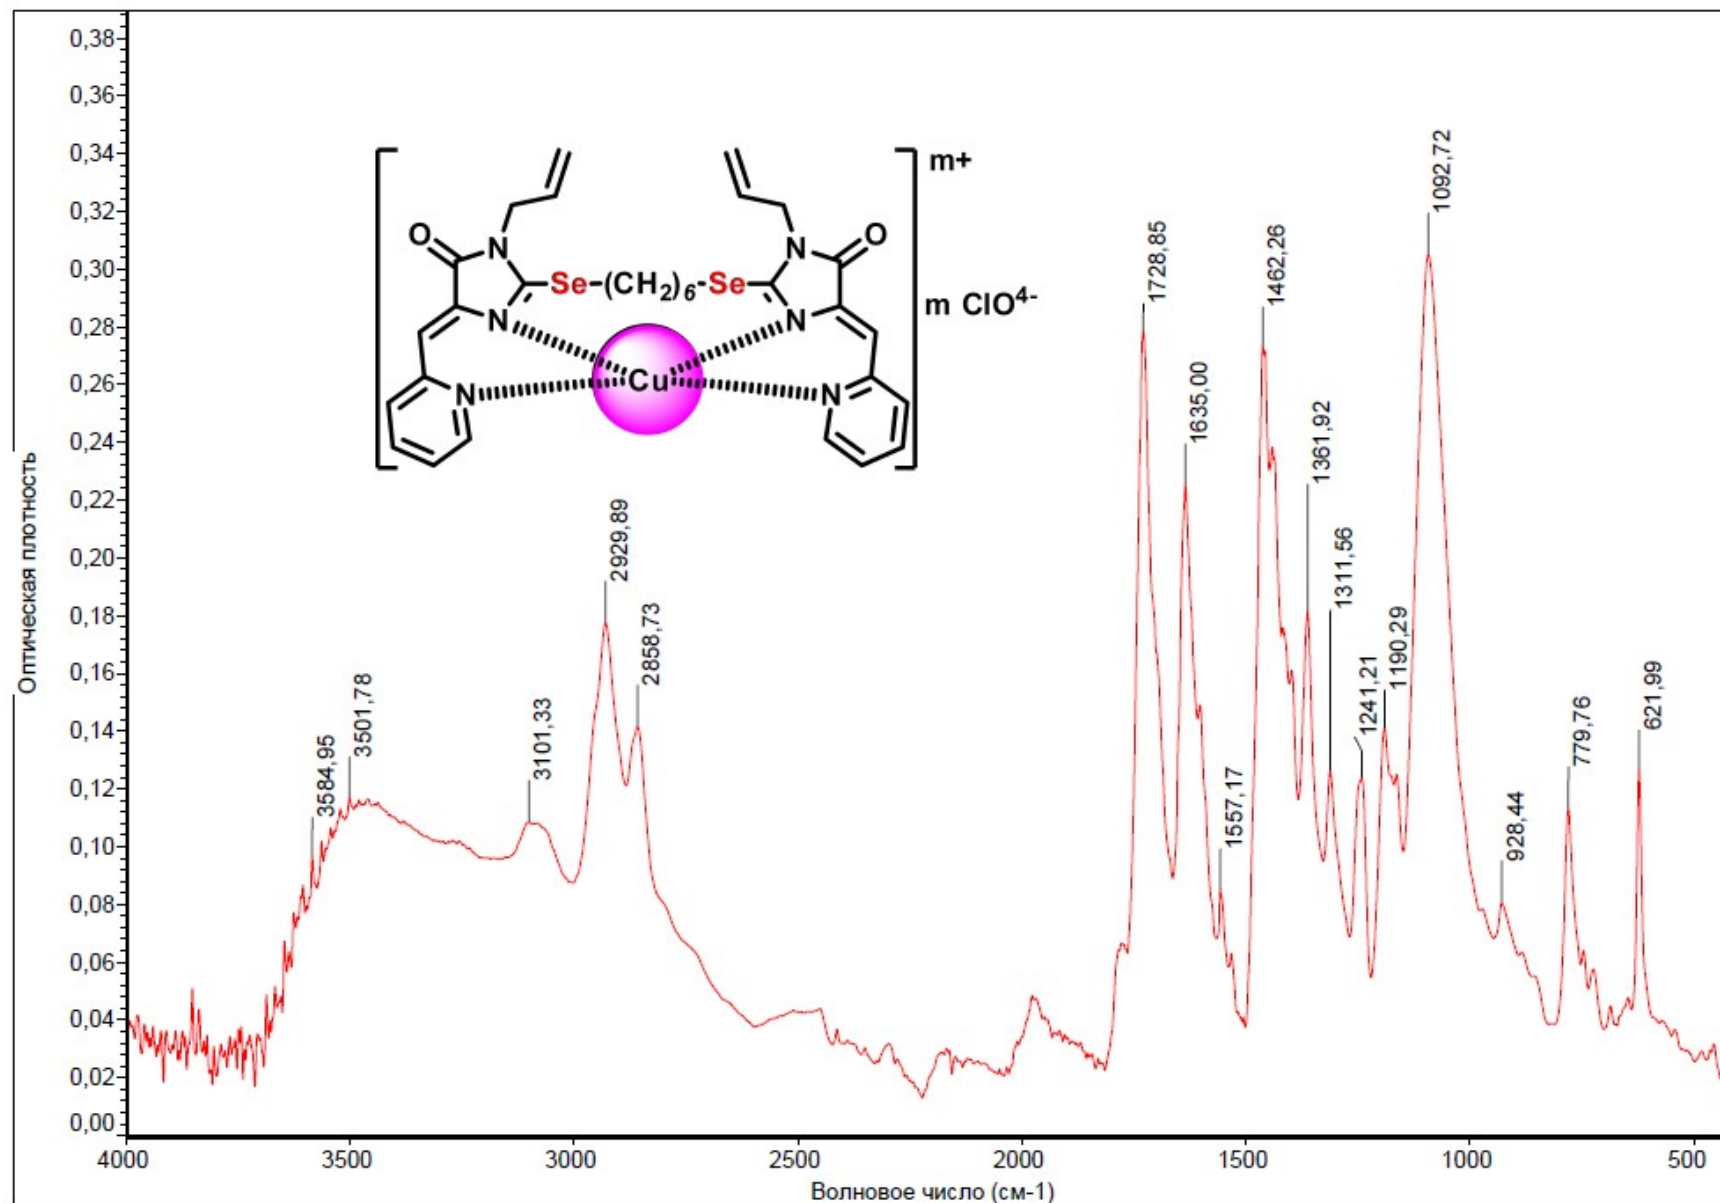

FTIR (4Z,4'Z)-2,2'-(decane-1,10-diylbis(selanediyl))bis(1-allyl-4-(pyridin-2-ylmethylene)-1H-imidazol-5(4H)-one)copper(I,II) trichloride (**6j**).

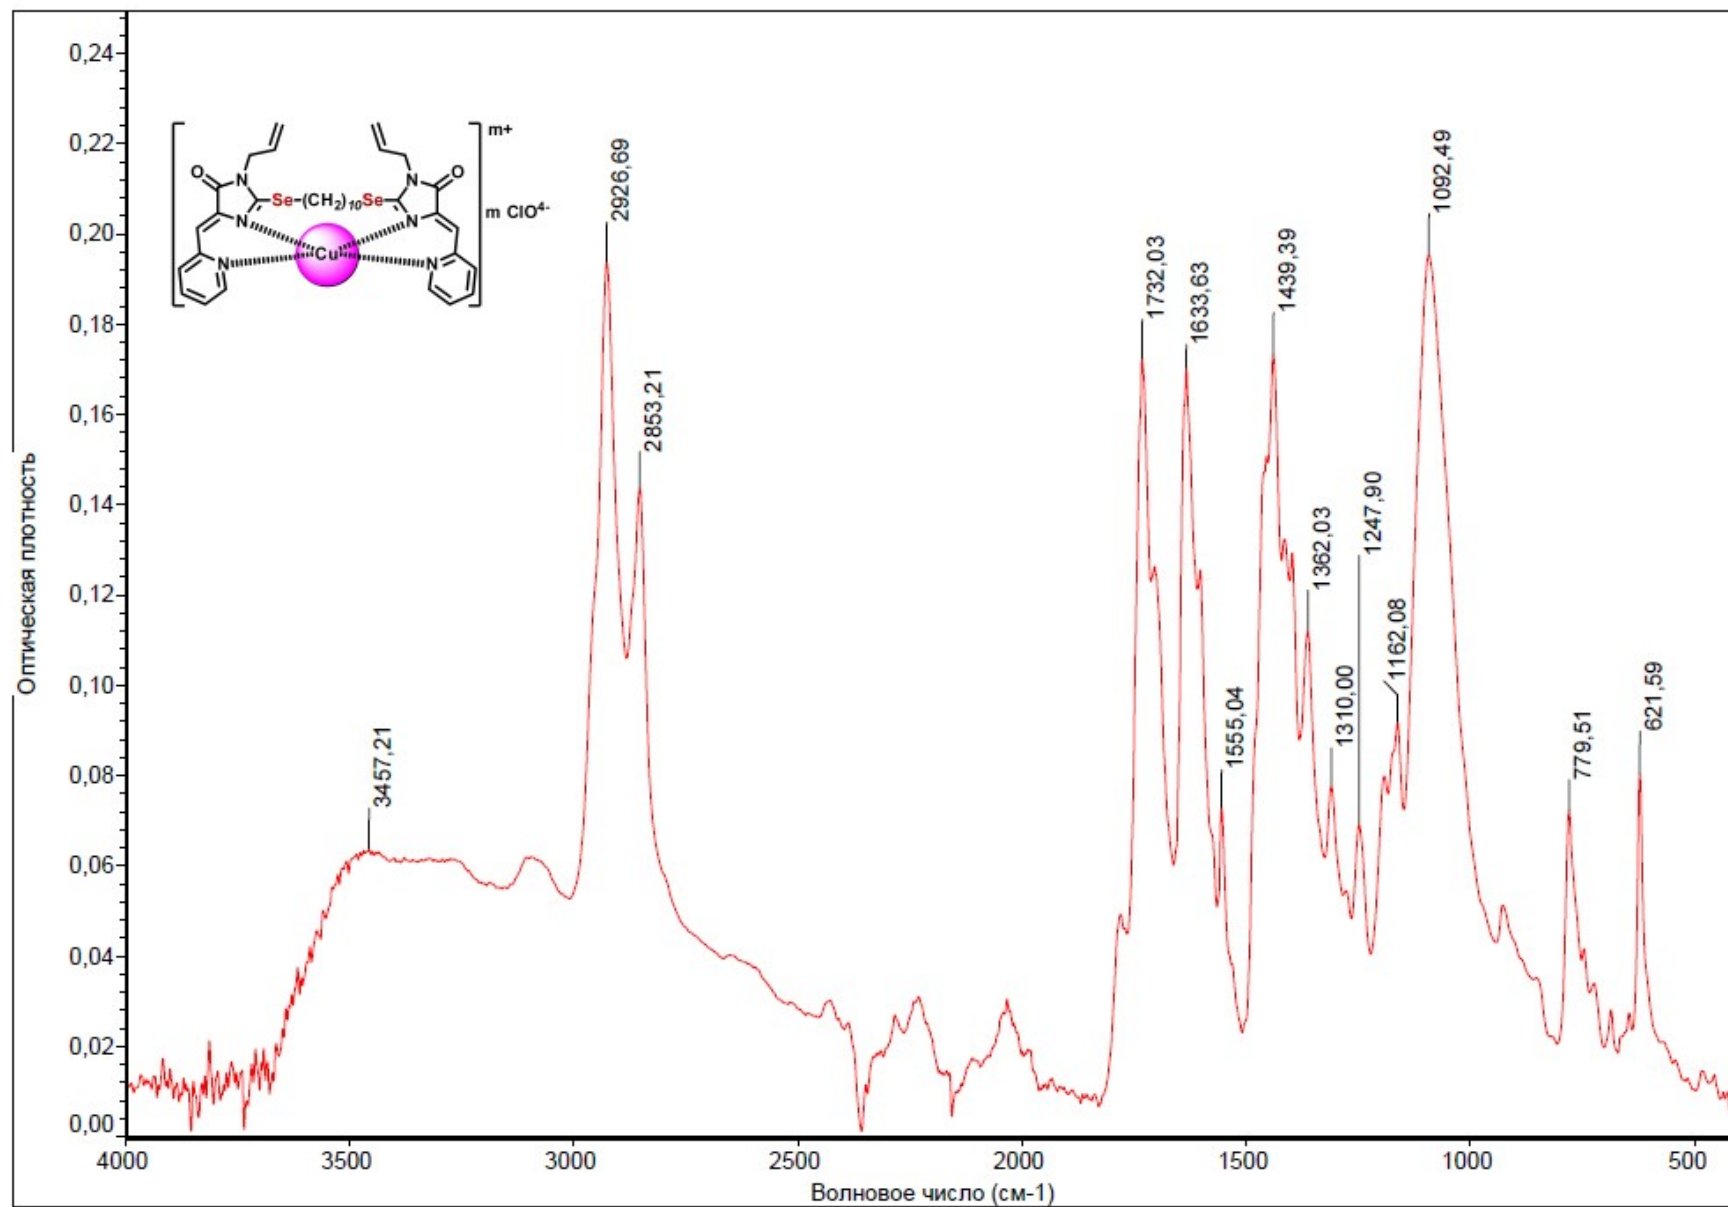

## Voltammograms

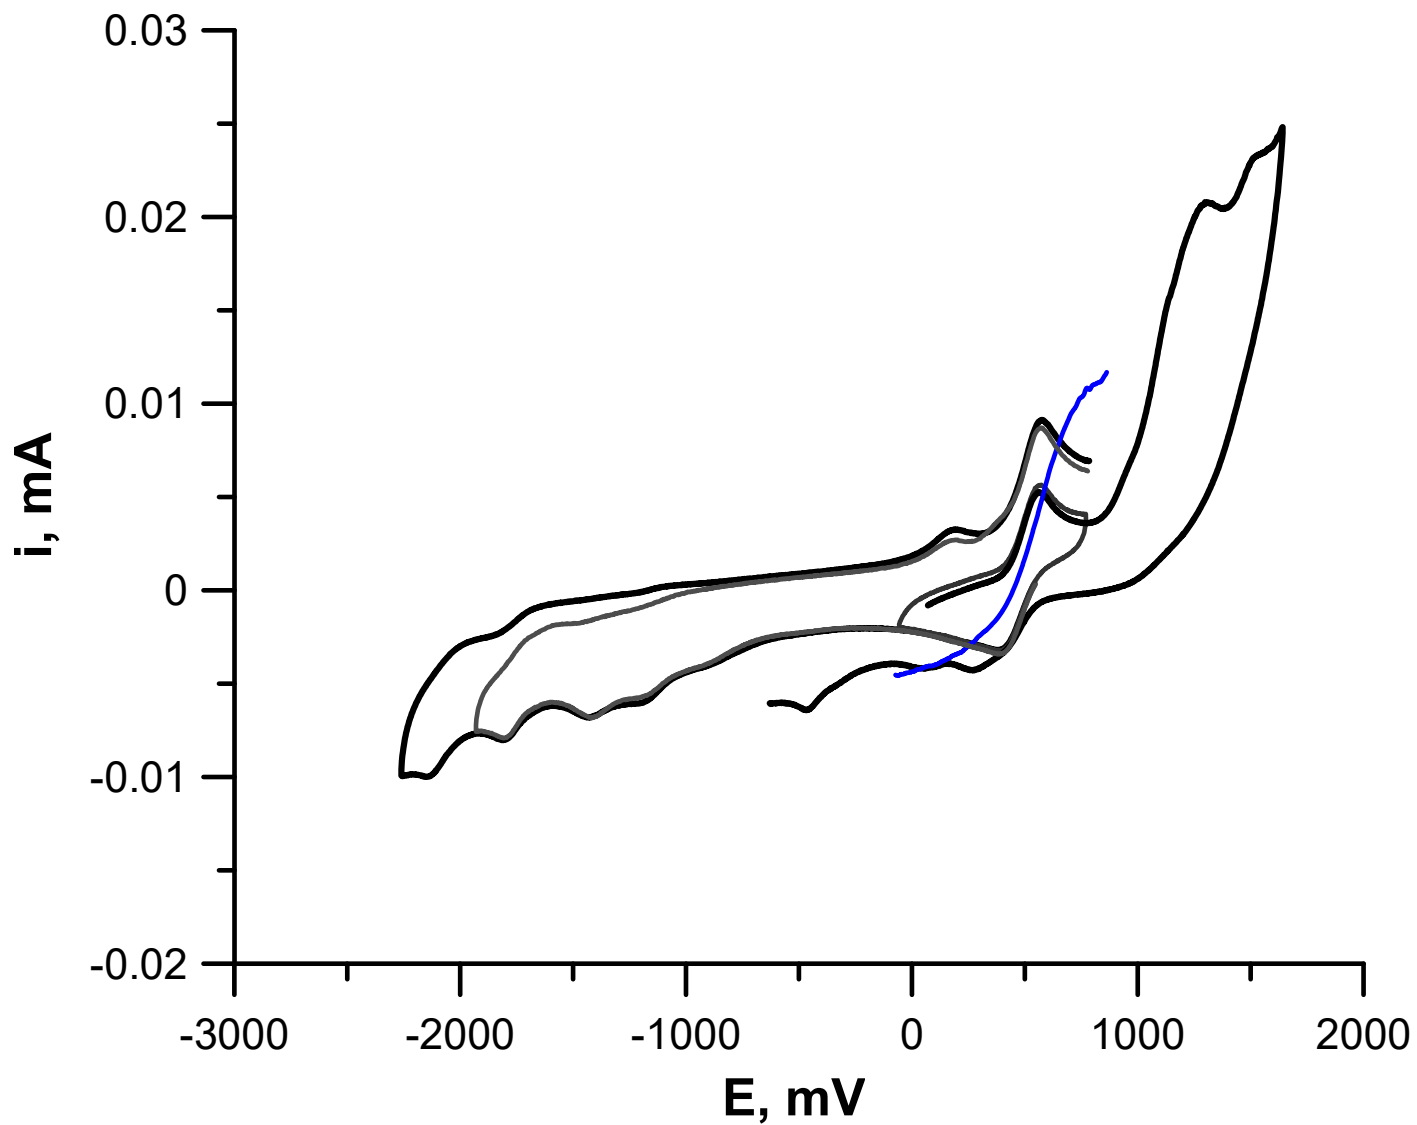

Figure 1S. Cyclic voltammograms (black) and RDE curves (color) of compound **5a**. DMF,  $5 \cdot 10^{-4}$ M, 0.1M  $\text{Bu}_4\text{NClO}_4$ .



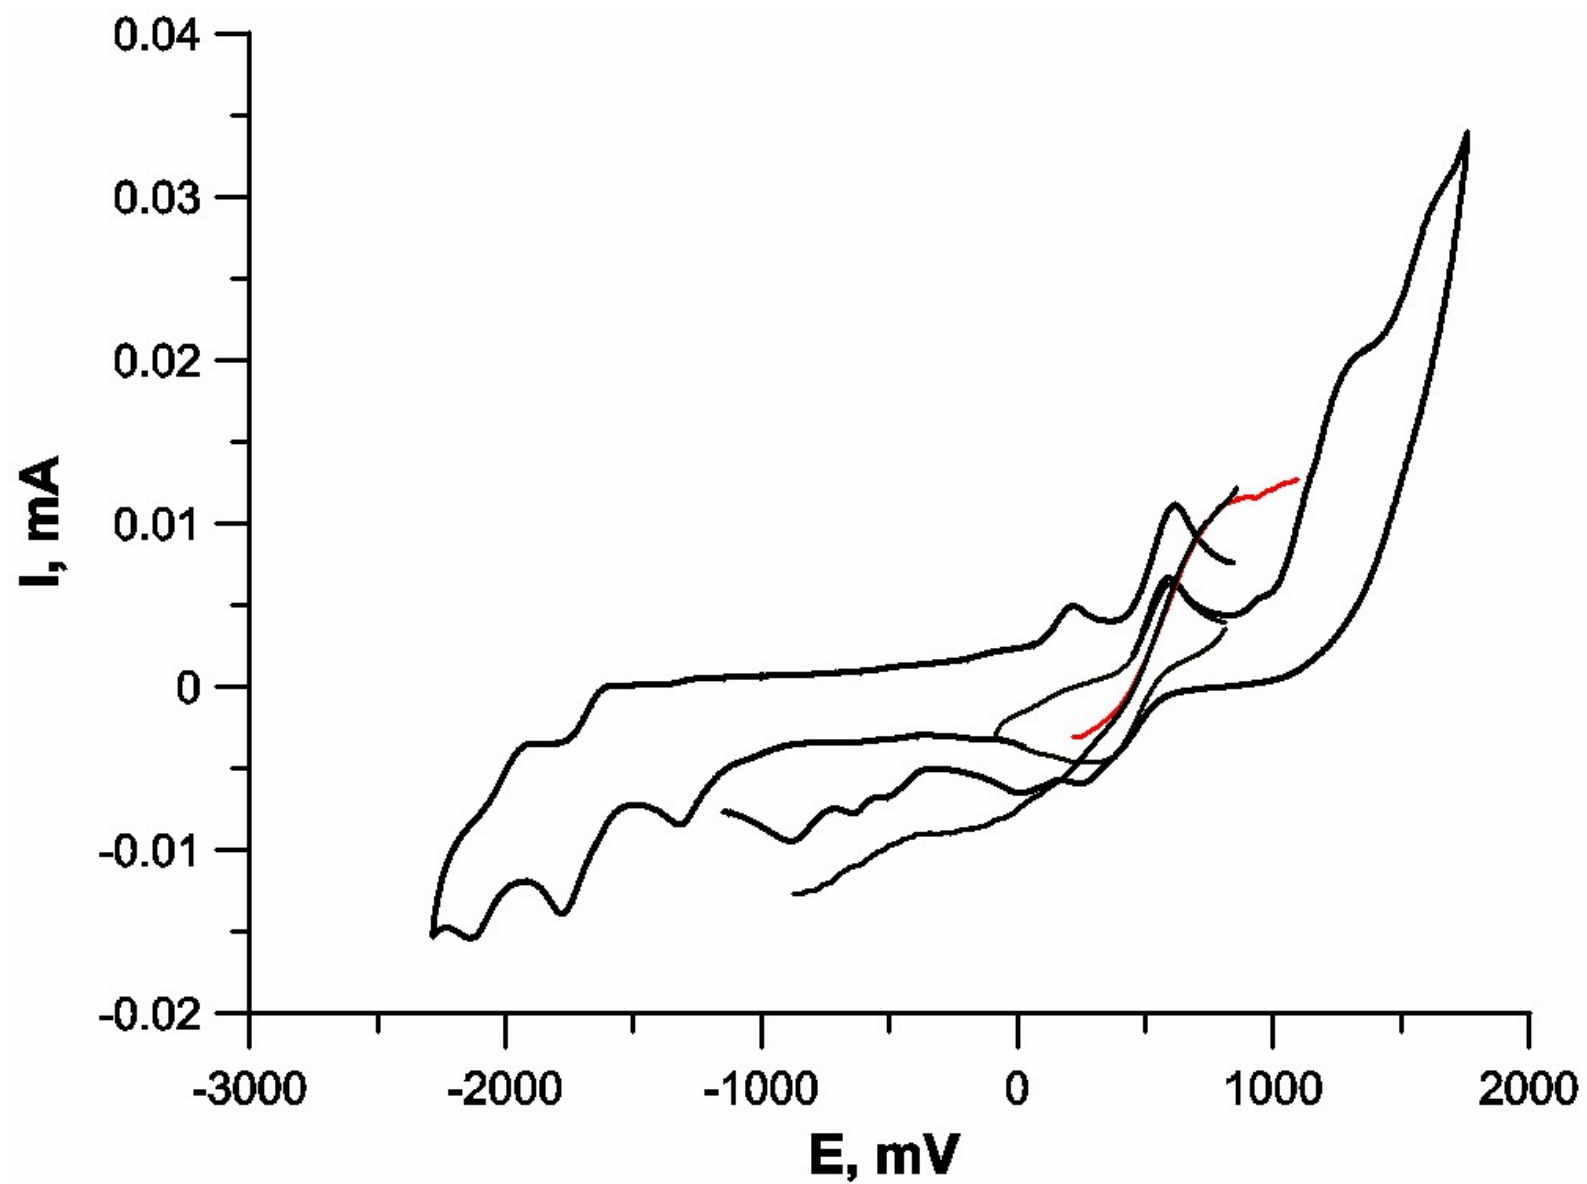

Figure 2S. Cyclic voltammograms (black) and RDE curves (color) of compound **5b**. DMF,  $5 \cdot 10^{-4}$ M, 0.1M  $\text{Bu}_4\text{NClO}_4$ .

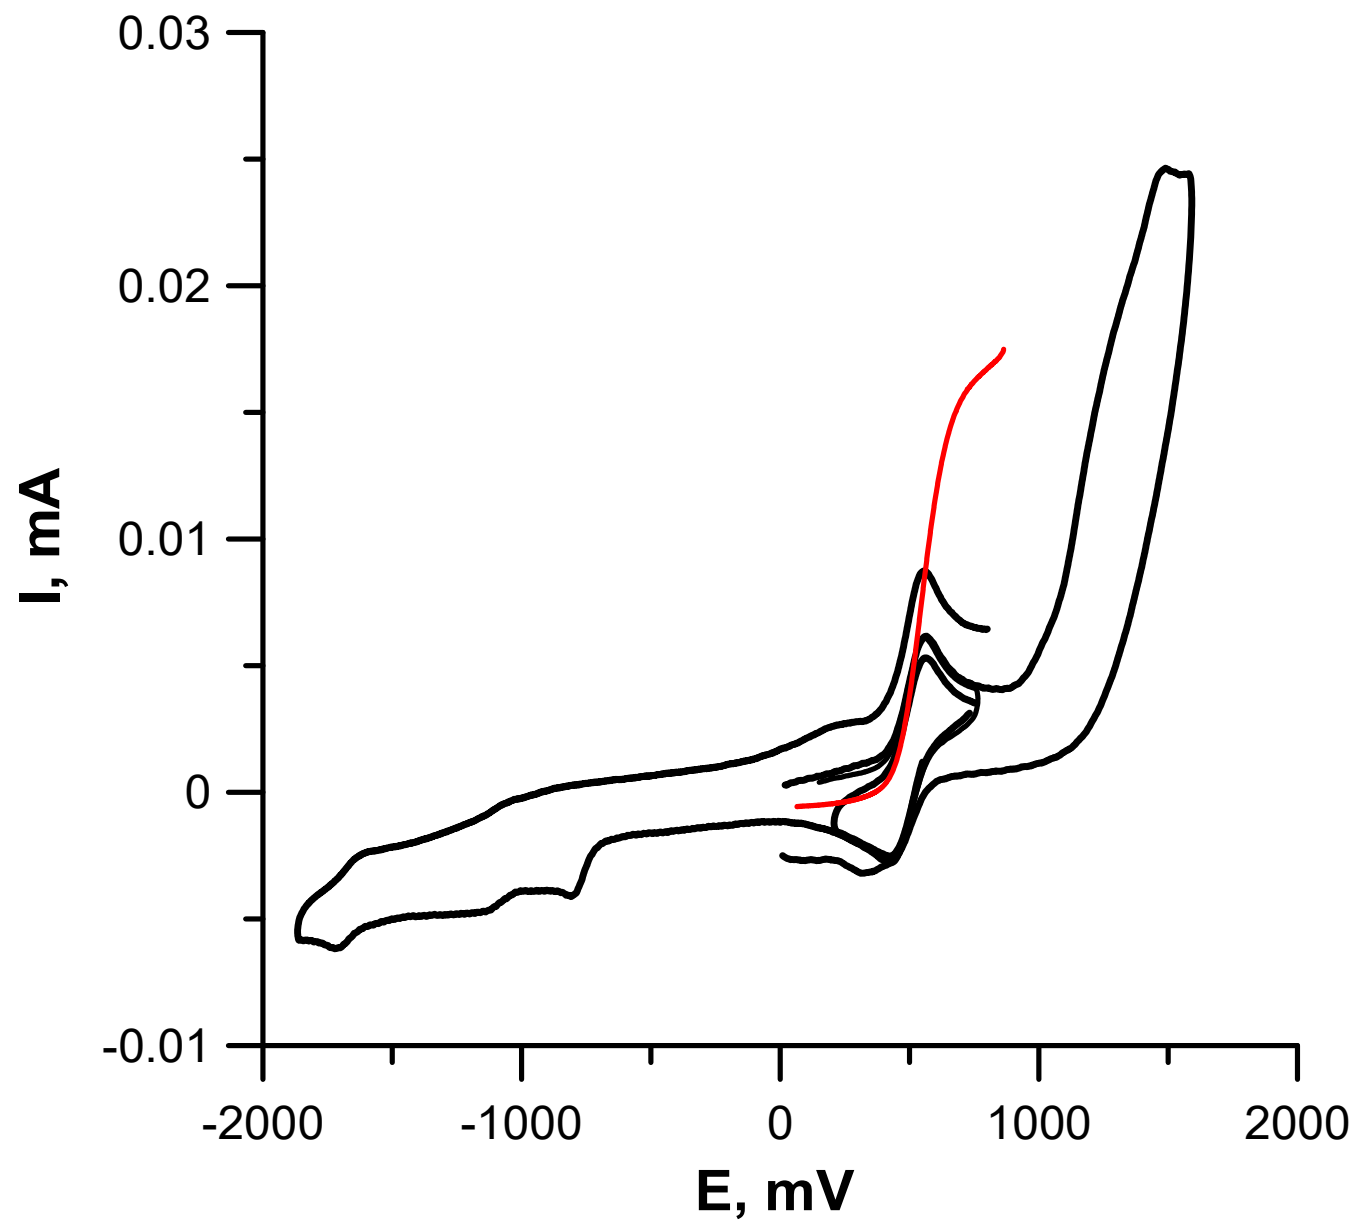

Figure 3S. Cyclic voltammograms (black) and RDE curves (color) of compound **5c**. DMF,  $5 \cdot 10^{-4}$ M, 0.1M  $\text{Bu}_4\text{NClO}_4$ .

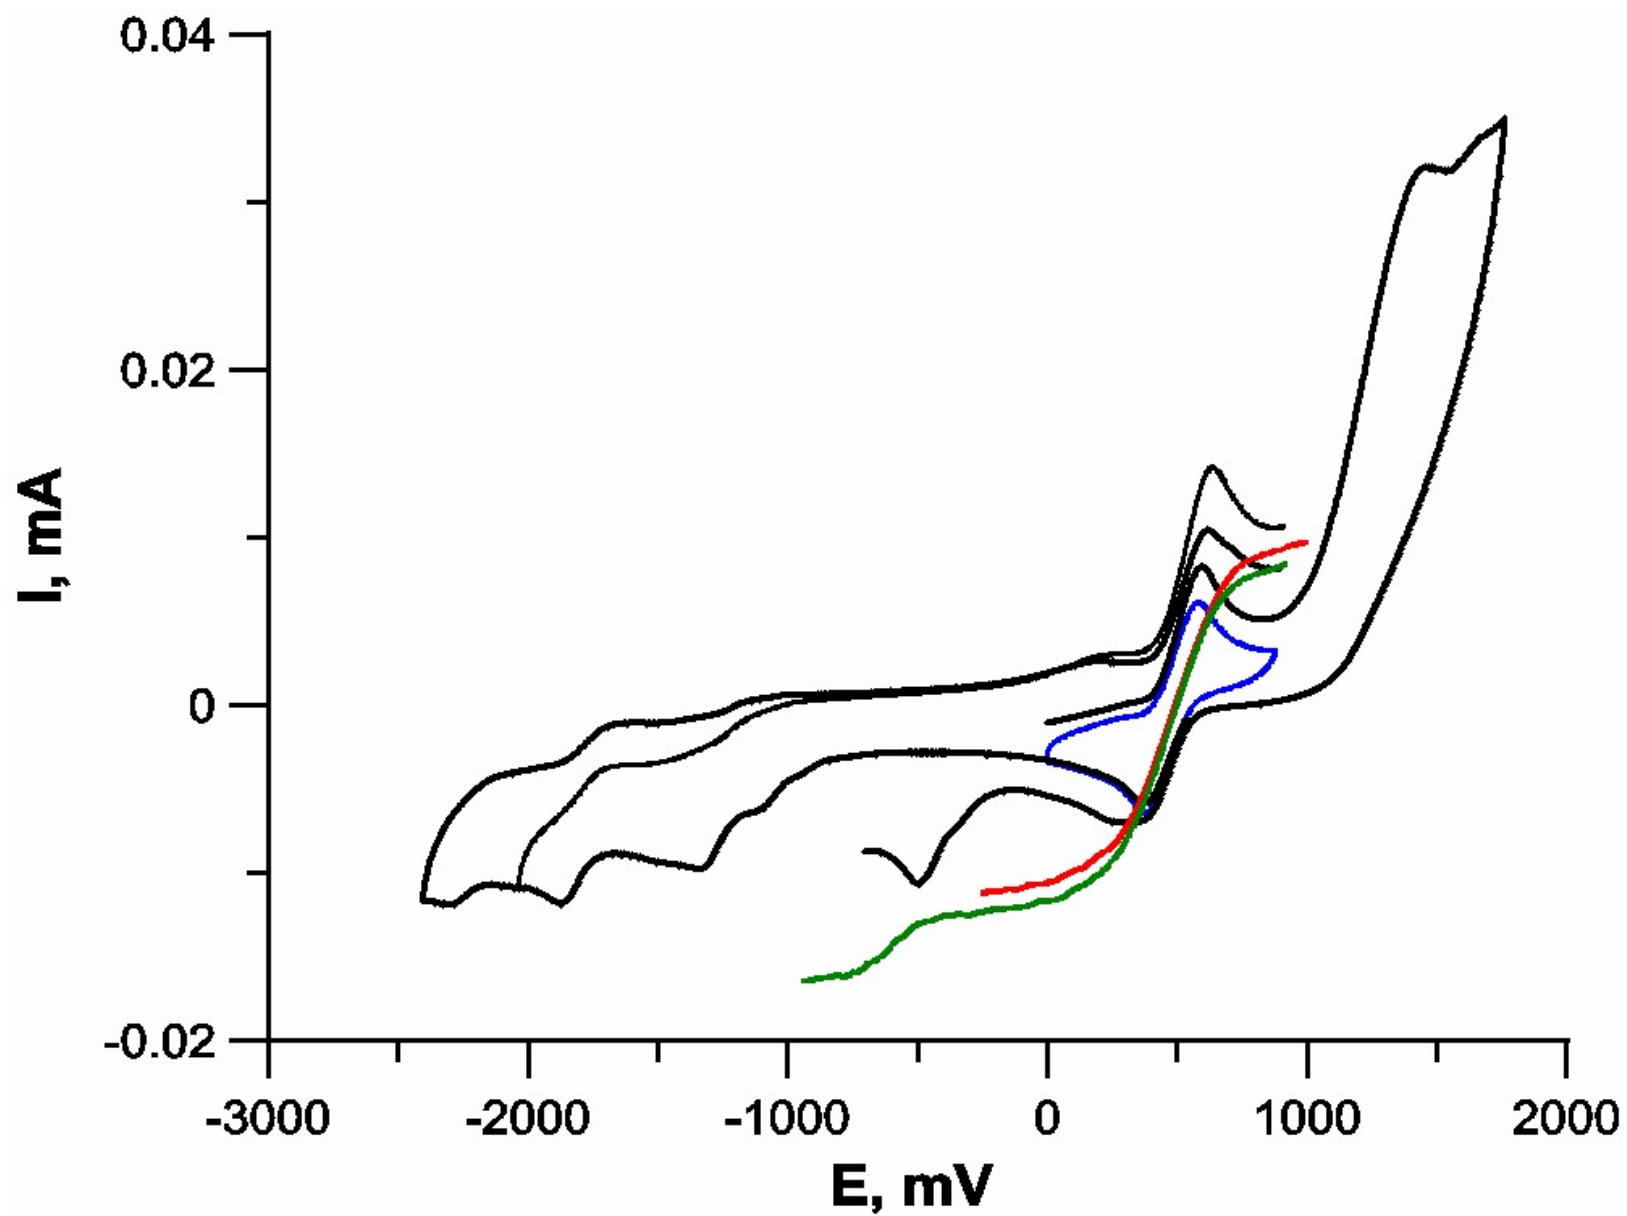

Figure 4S. Cyclic voltammograms (black) and RDE curves (color) of compound **5d**. DMF,  $5 \cdot 10^{-4}$ M, 0.1M  $\text{Bu}_4\text{NClO}_4$ .

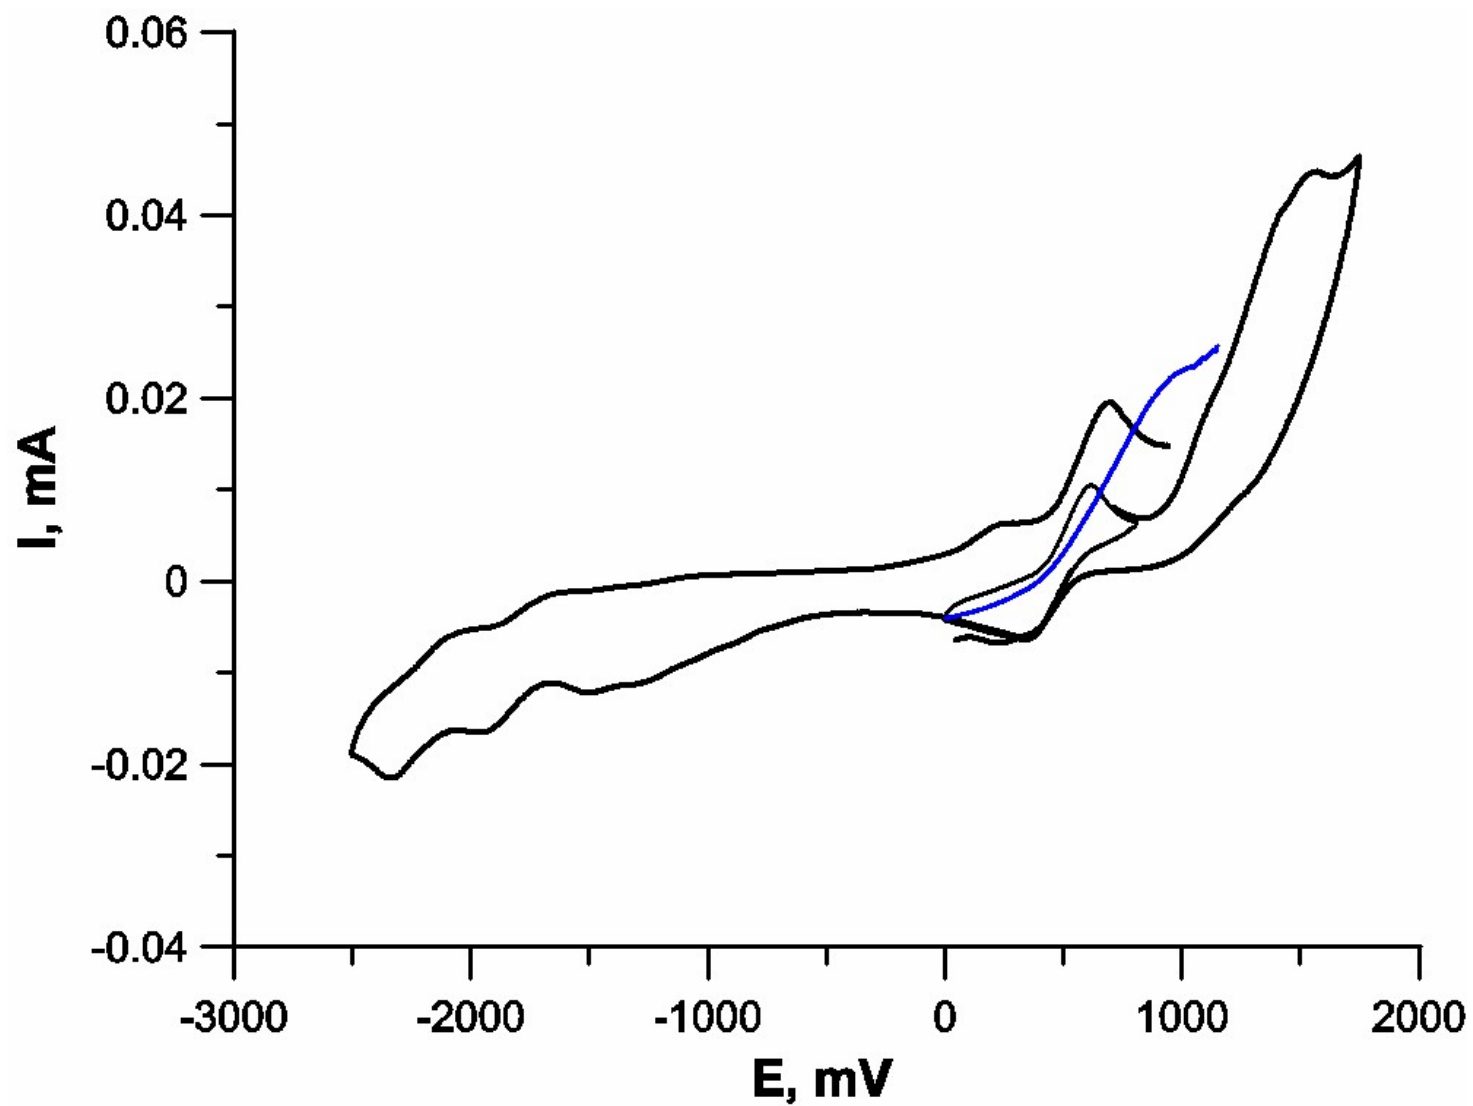

Figure 5S. Cyclic voltammograms (black) and RDE curves (color) of compound **5e**. DMF,  $5 \cdot 10^{-4}$  M, 0.1 M  $\text{Bu}_4\text{NClO}_4$ .

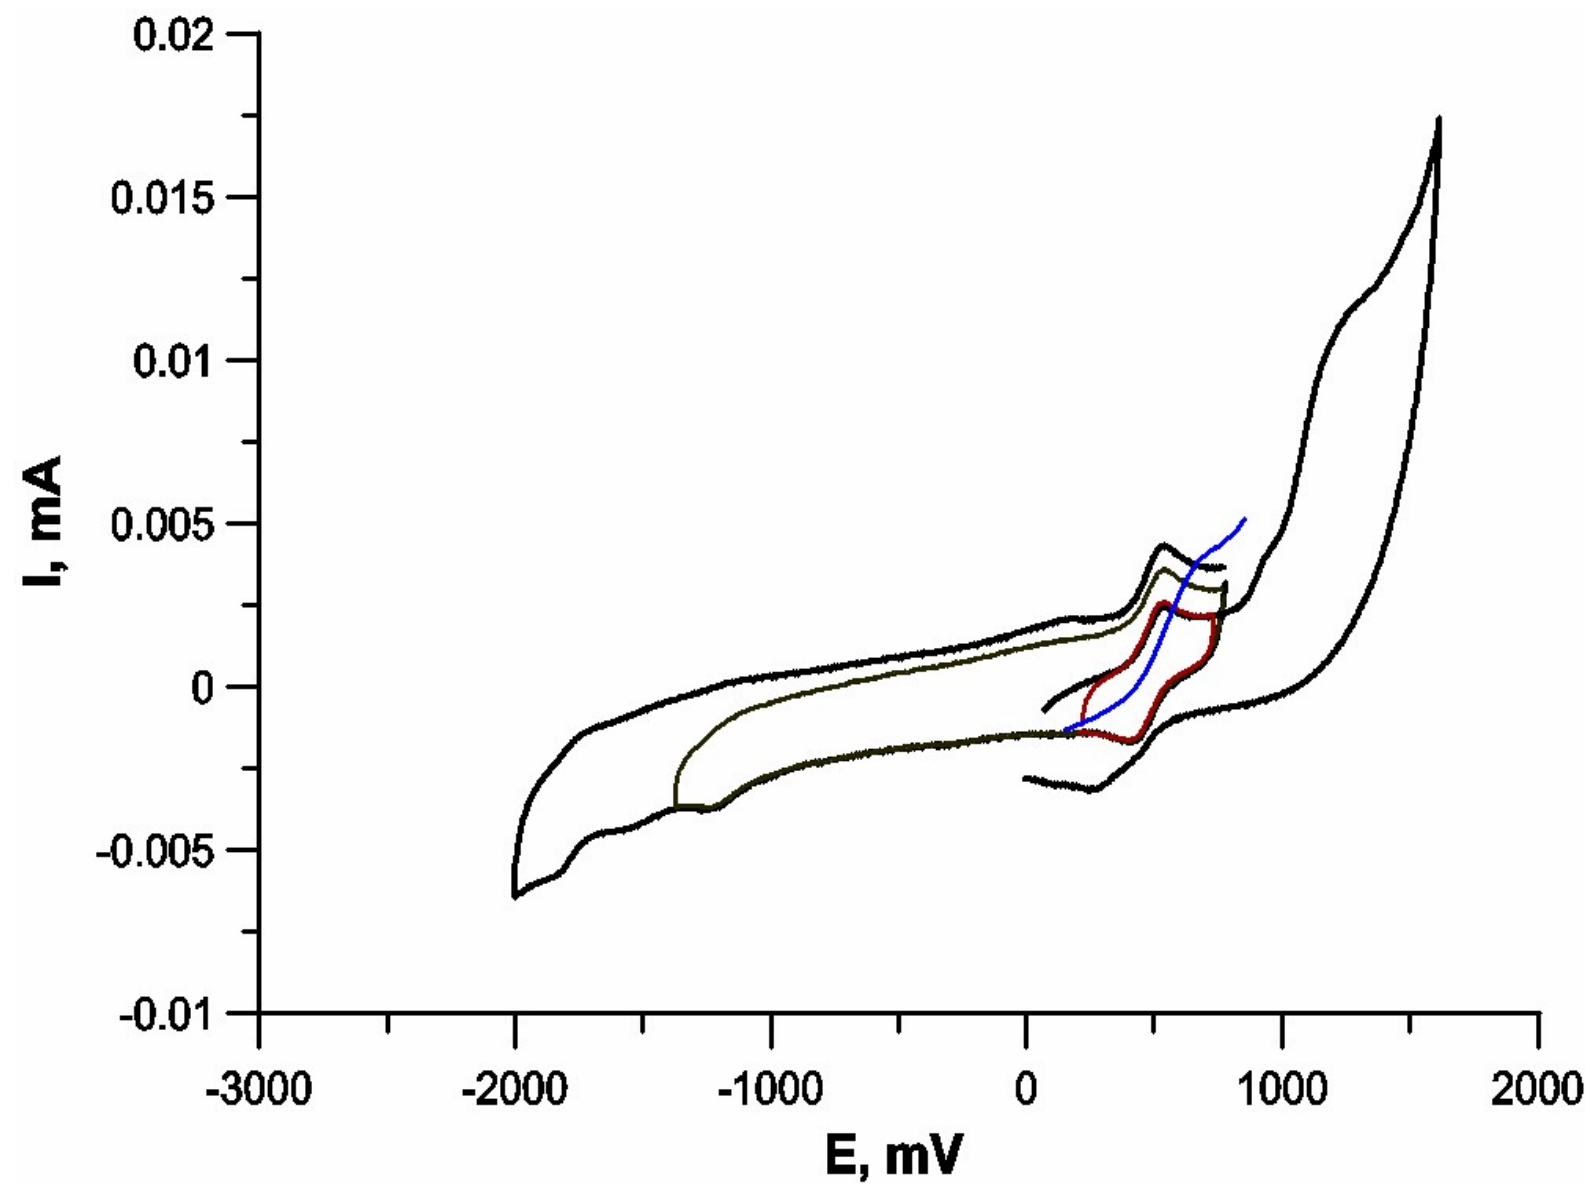

Figure 6S. Cyclic voltammograms (black) and RDE curves (color) of compound **5f**. DMF,  $5 \cdot 10^{-4}$ M, 0.1M  $\text{Bu}_4\text{NClO}_4$ .

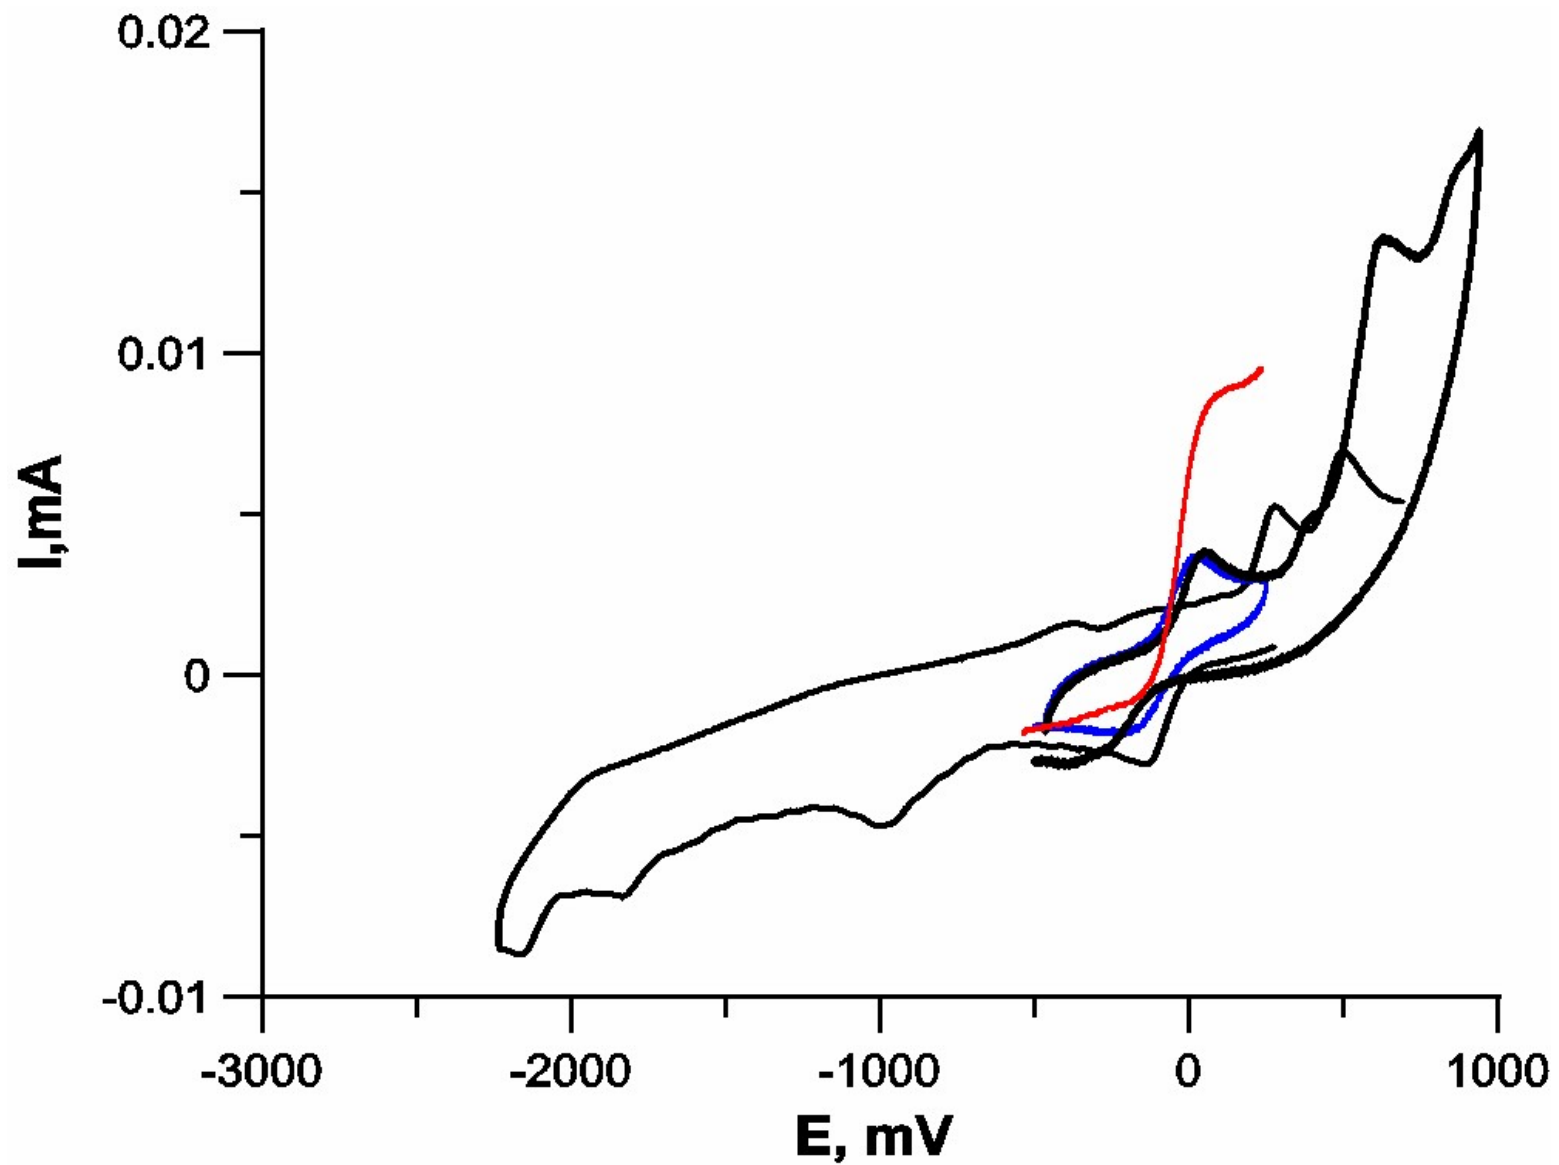

Figure 7S. Cyclic voltammograms (black) and RDE curves (color) of compound **5g**. DMF,  $5 \cdot 10^{-4}$ M, 0.1M  $\text{Bu}_4\text{NClO}_4$ .

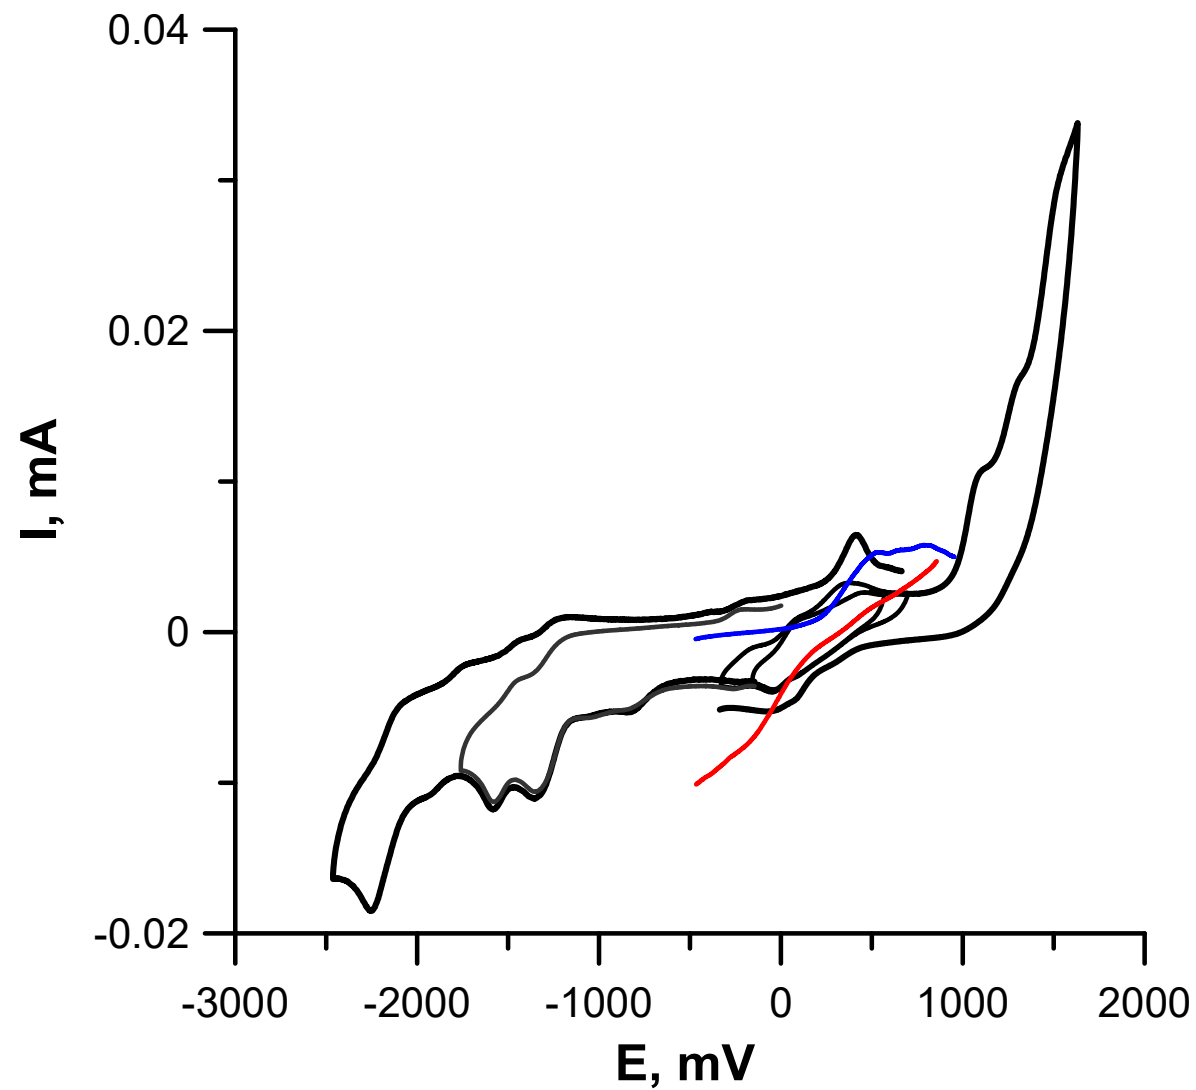

Figure 8S. Cyclic voltammograms (black) and RDE curves (color) of compound **5h**. DMF,  $5 \cdot 10^{-4}$ M, 0.1M  $\text{Bu}_4\text{NClO}_4$ .

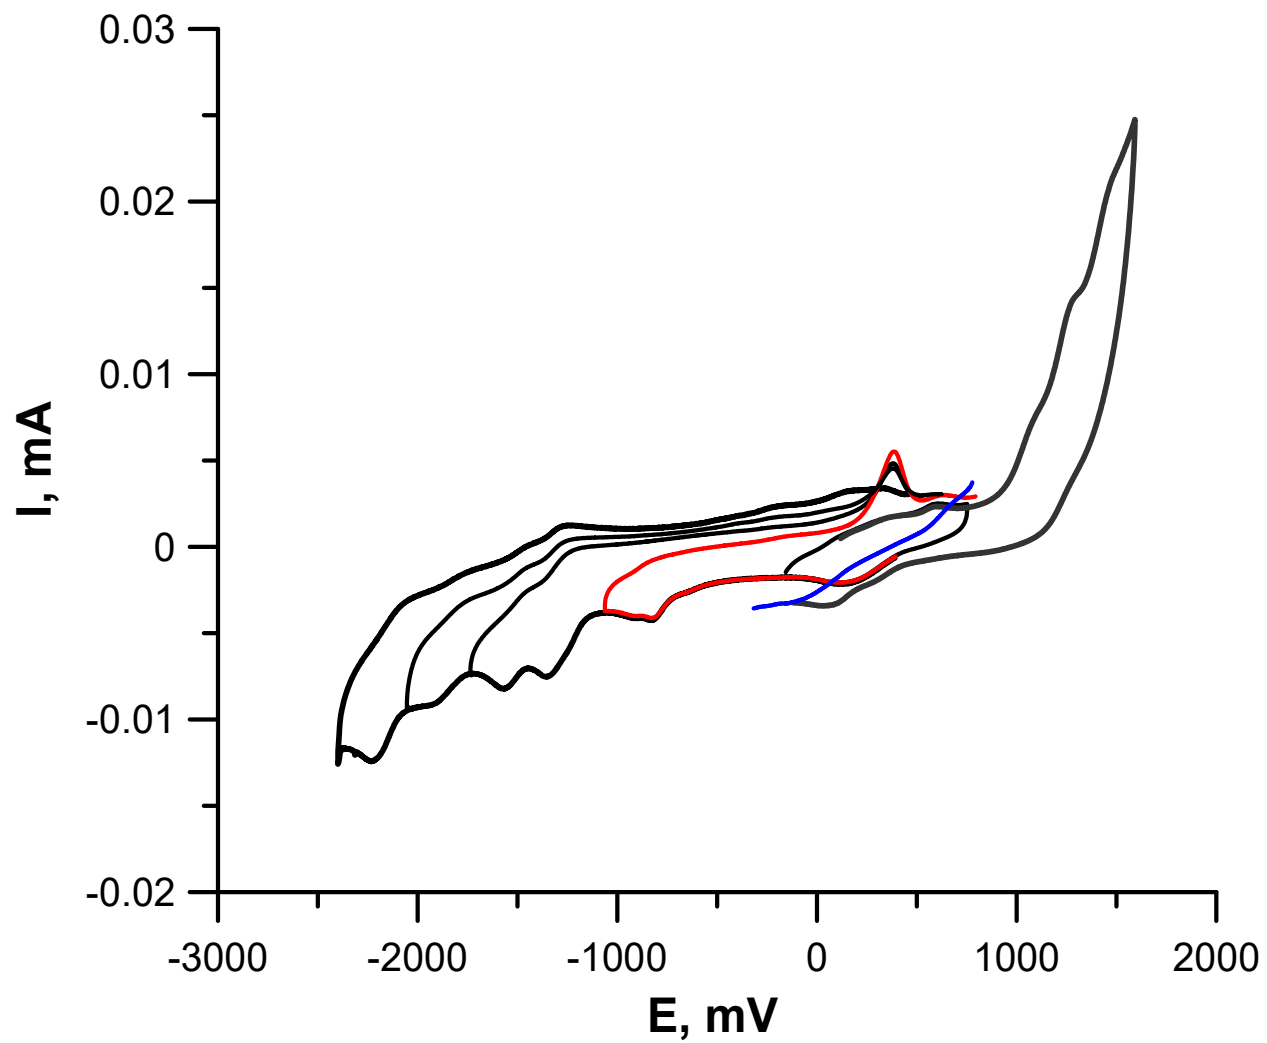

Figure 9S. Cyclic voltammograms (black) and RDE curves (color) of compound **5i**. DMF,  $5 \cdot 10^{-4}$ M, 0.1M  $\text{Bu}_4\text{NClO}_4$ .



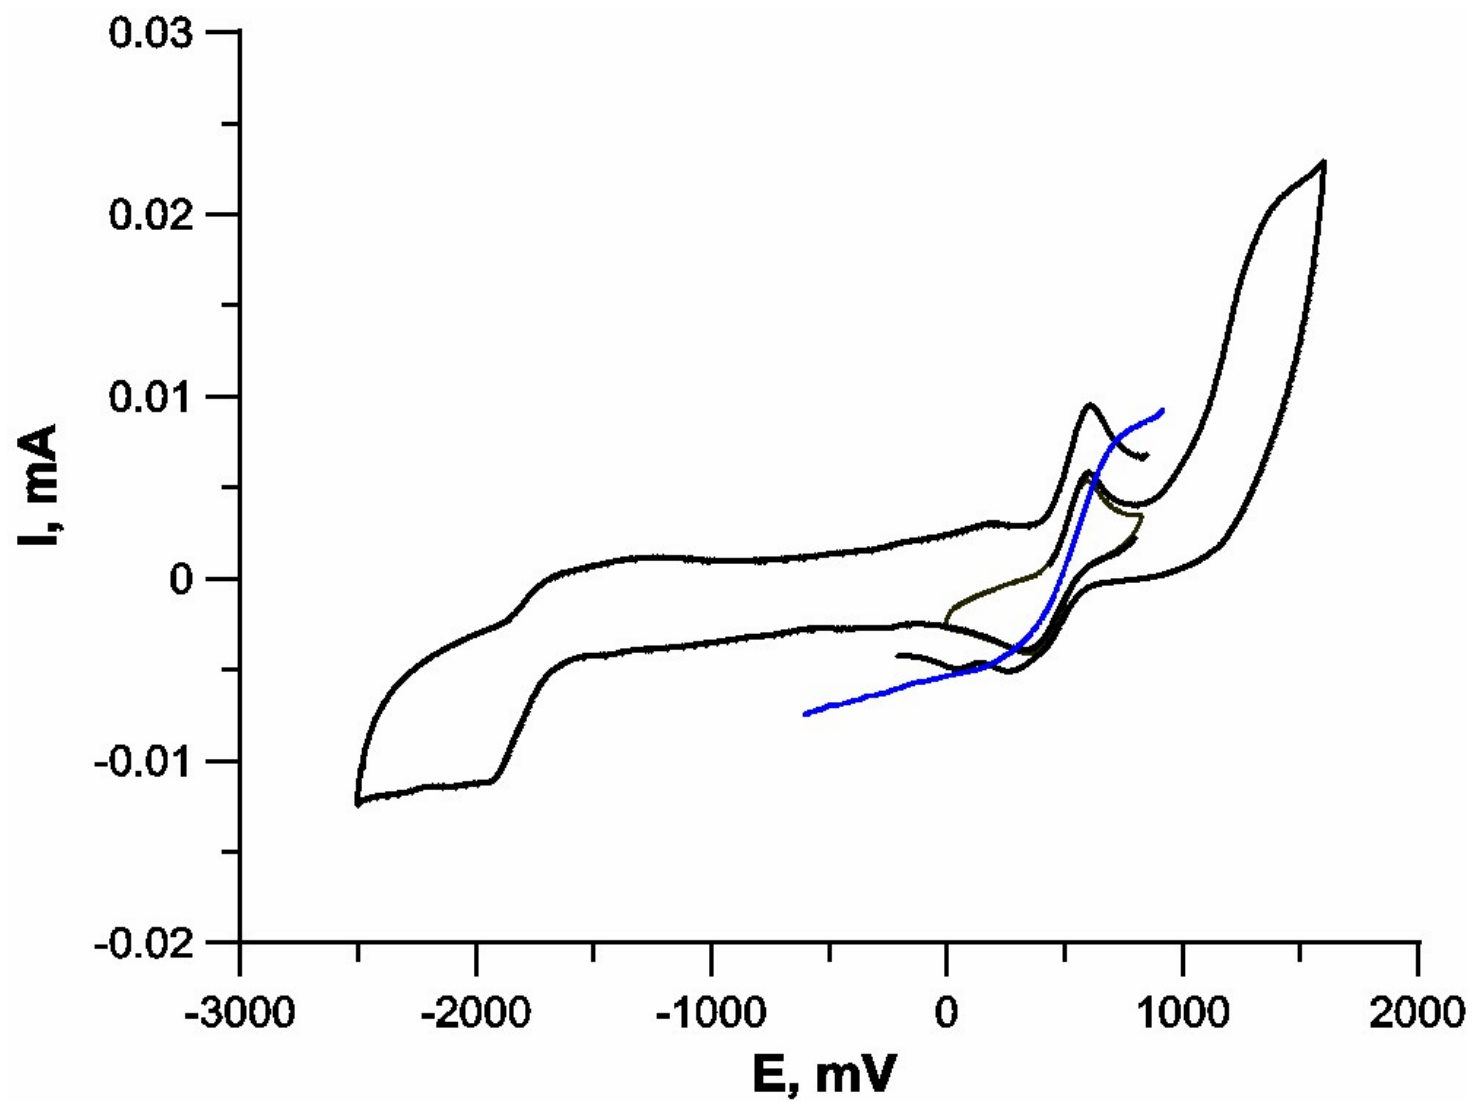

Figure 10S. Cyclic voltammograms (black) and RDE curves (color) of compound **5j**. DMF,  $5 \cdot 10^{-4}$ M, 0.1M  $\text{Bu}_4\text{NClO}_4$ .

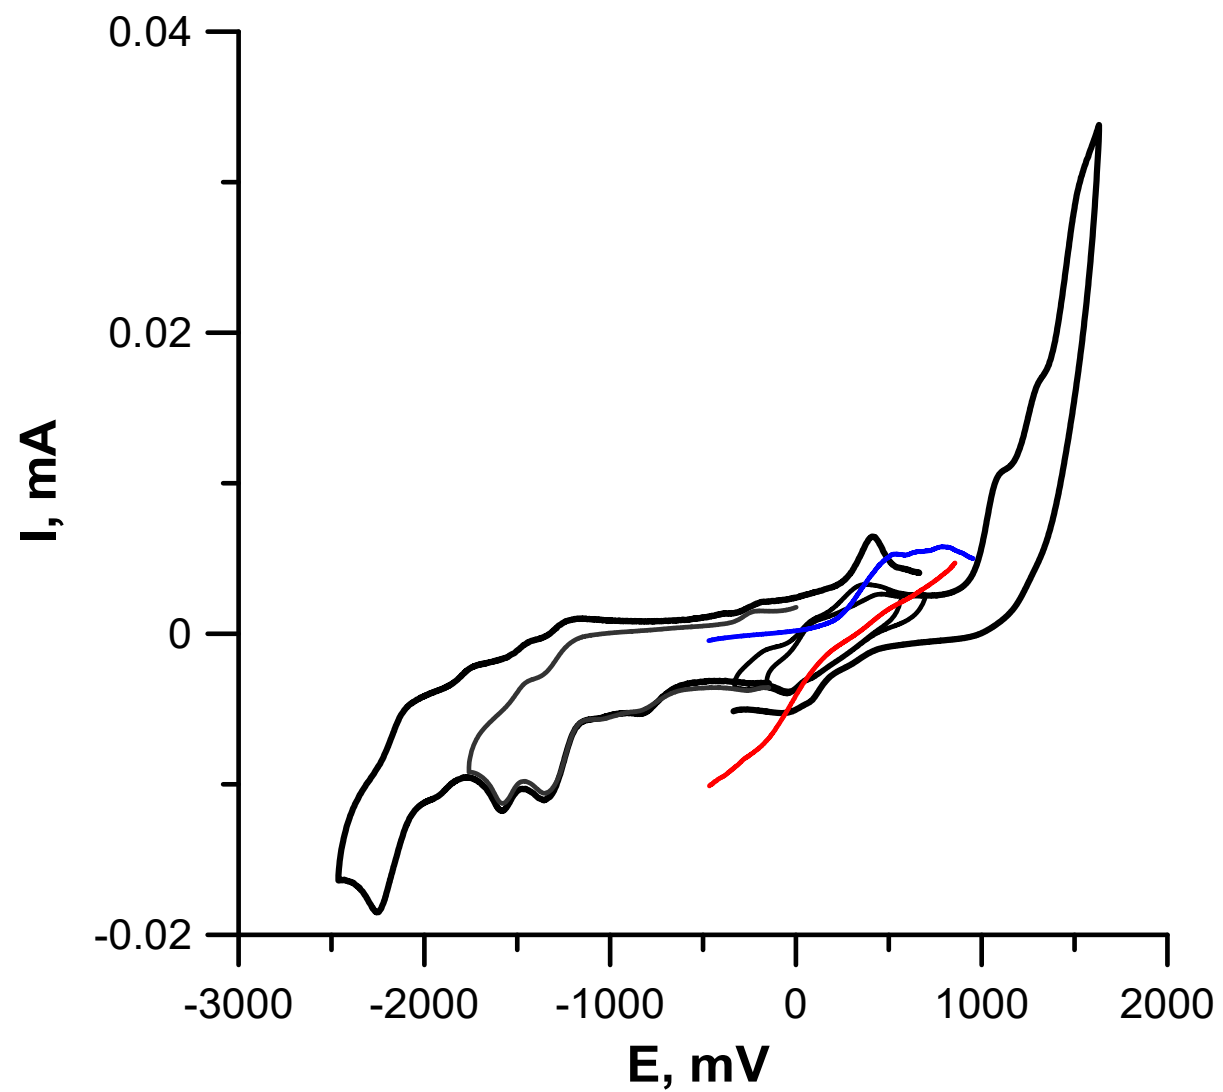

Figure 11S. Cyclic voltammograms (black) and RDE curves (color) of compound **5k**. DMF,  $5 \cdot 10^{-4}$ M, 0.1M  $\text{Bu}_4\text{NClO}_4$ .

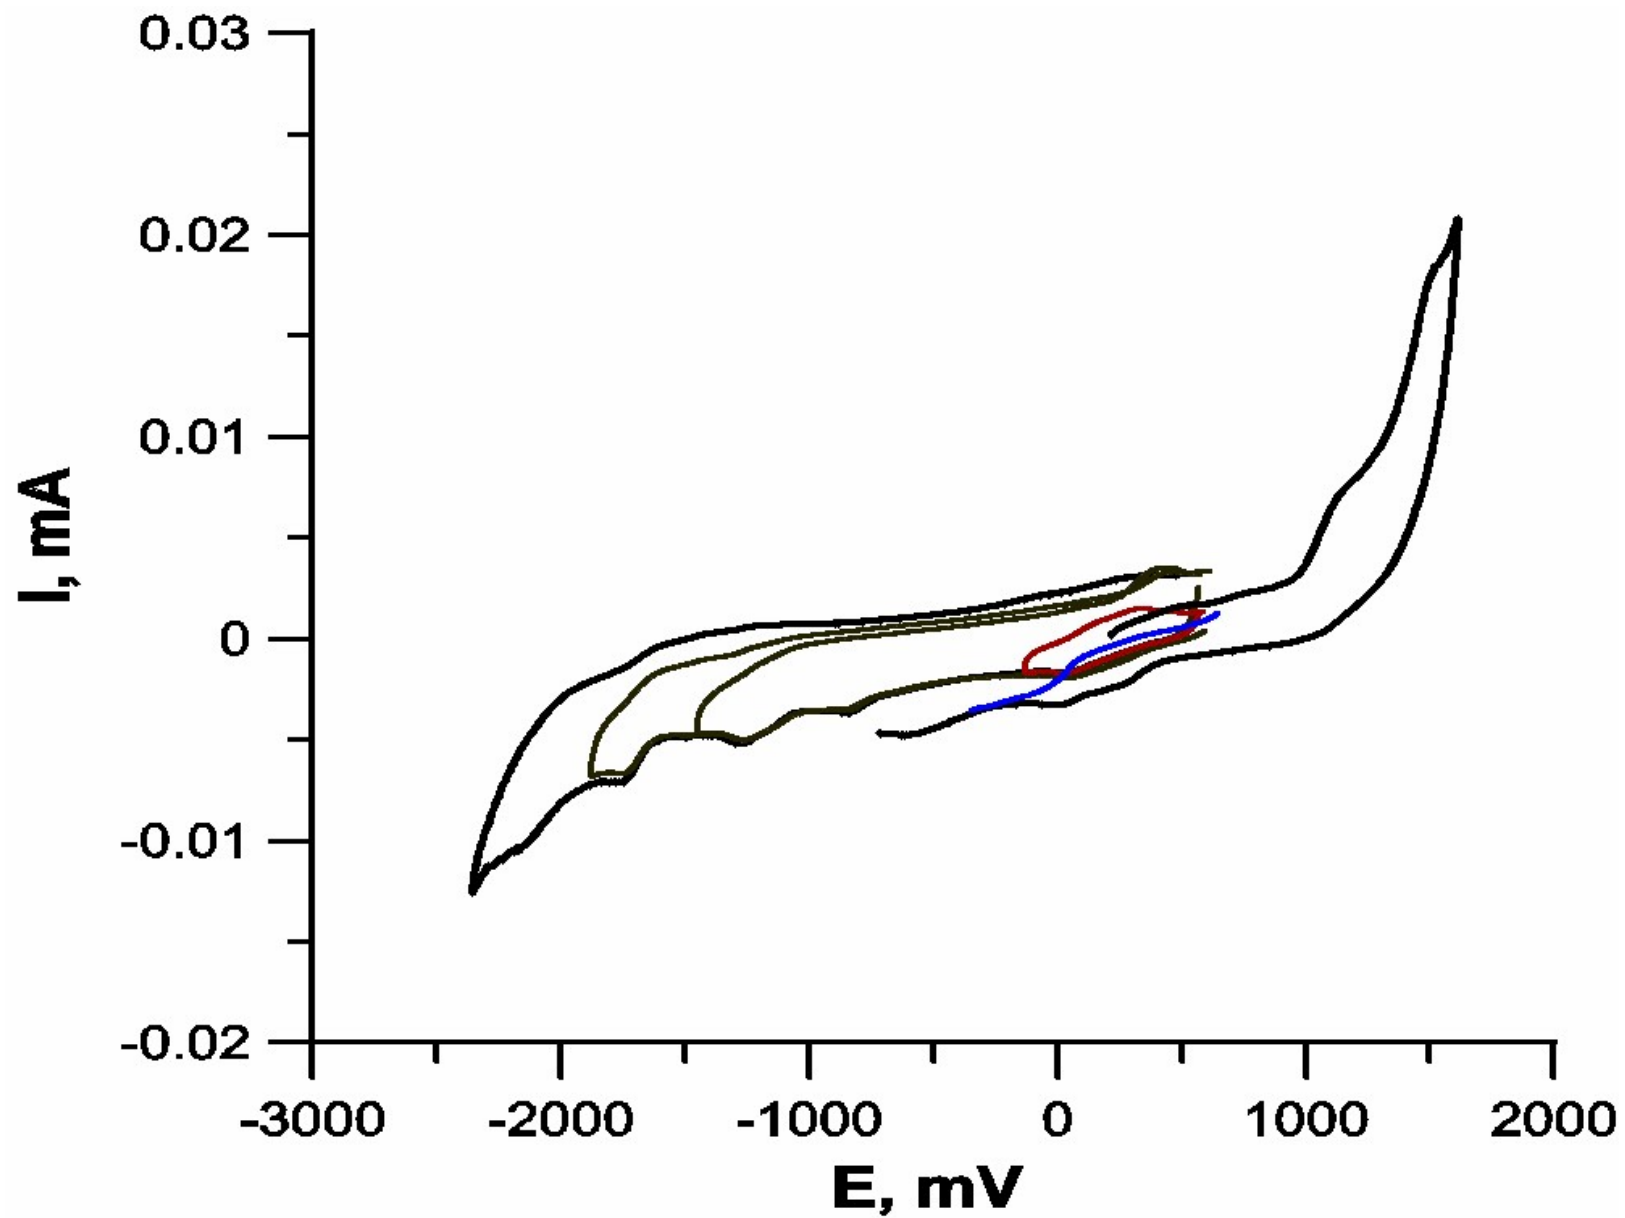

Figure 12S. Cyclic voltammograms (black) and RDE curves (color) of compound **6a**. DMF,  $5 \cdot 10^{-4}$ M, 0.1M  $\text{Bu}_4\text{NClO}_4$ .

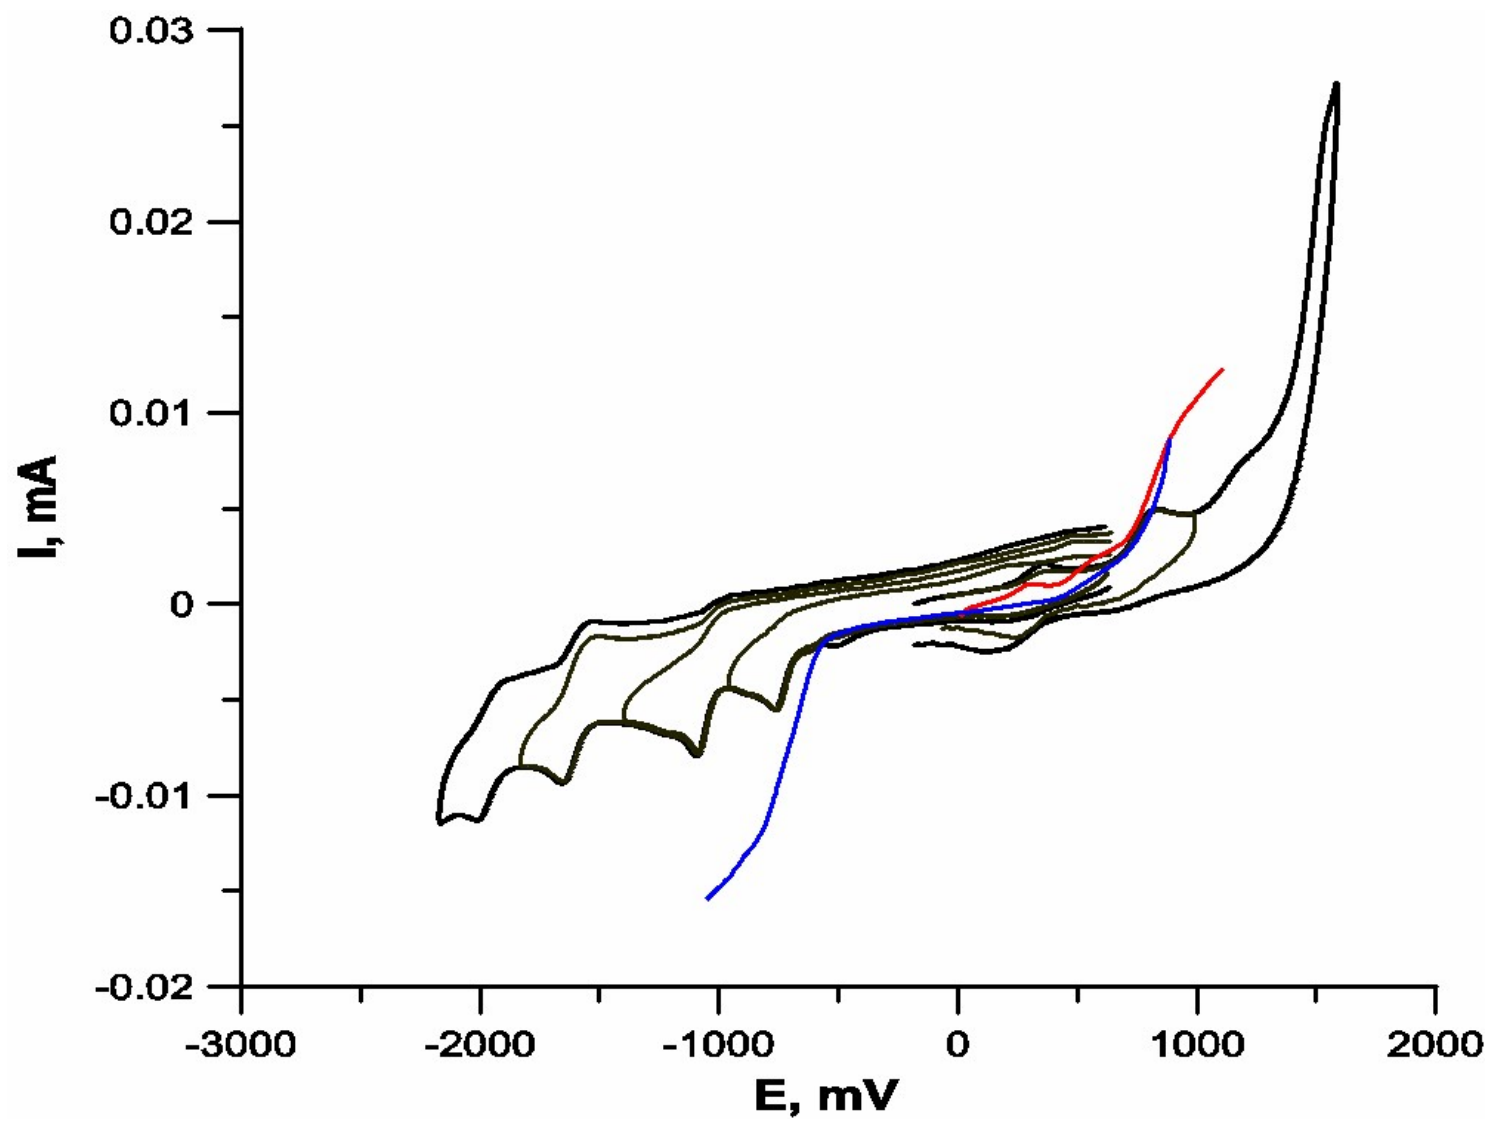

Figure 13S. Cyclic voltammograms (black) and RDE curves (color) of compound **6b**. DMF,  $5 \cdot 10^{-4}$ M, 0.1M  $\text{Bu}_4\text{NClO}_4$ .

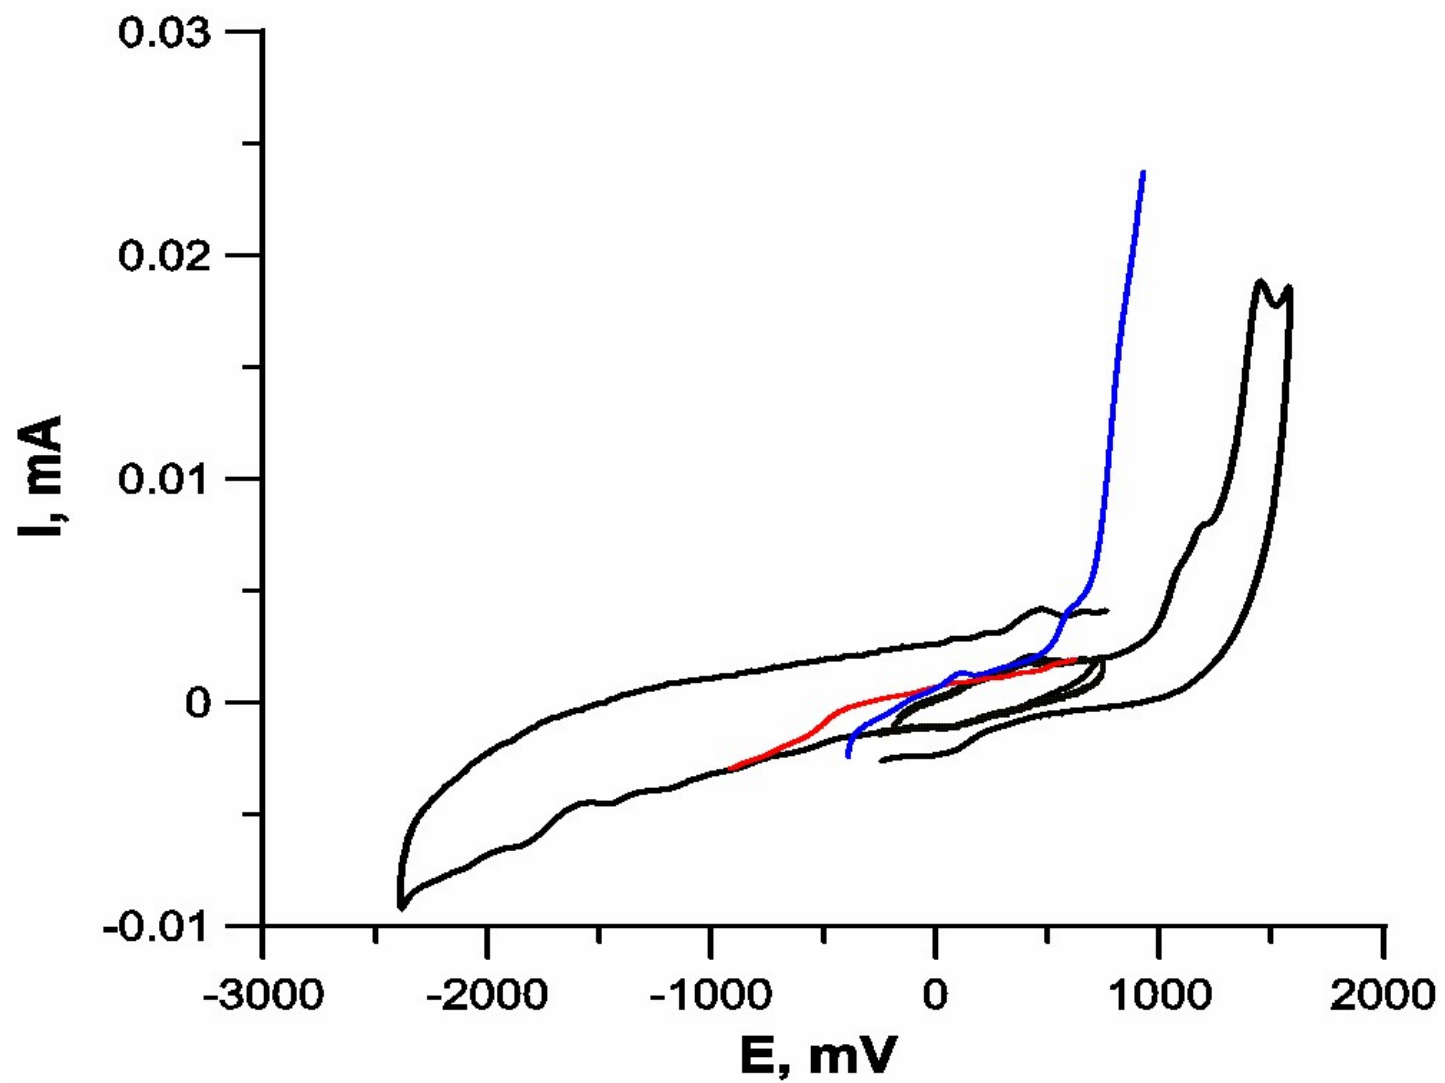

Figure 14S. Cyclic voltammograms (black) and RDE curves (color) of compound **6c**. DMF,  $5 \cdot 10^{-4}$ M, 0.1M  $\text{Bu}_4\text{NClO}_4$ .

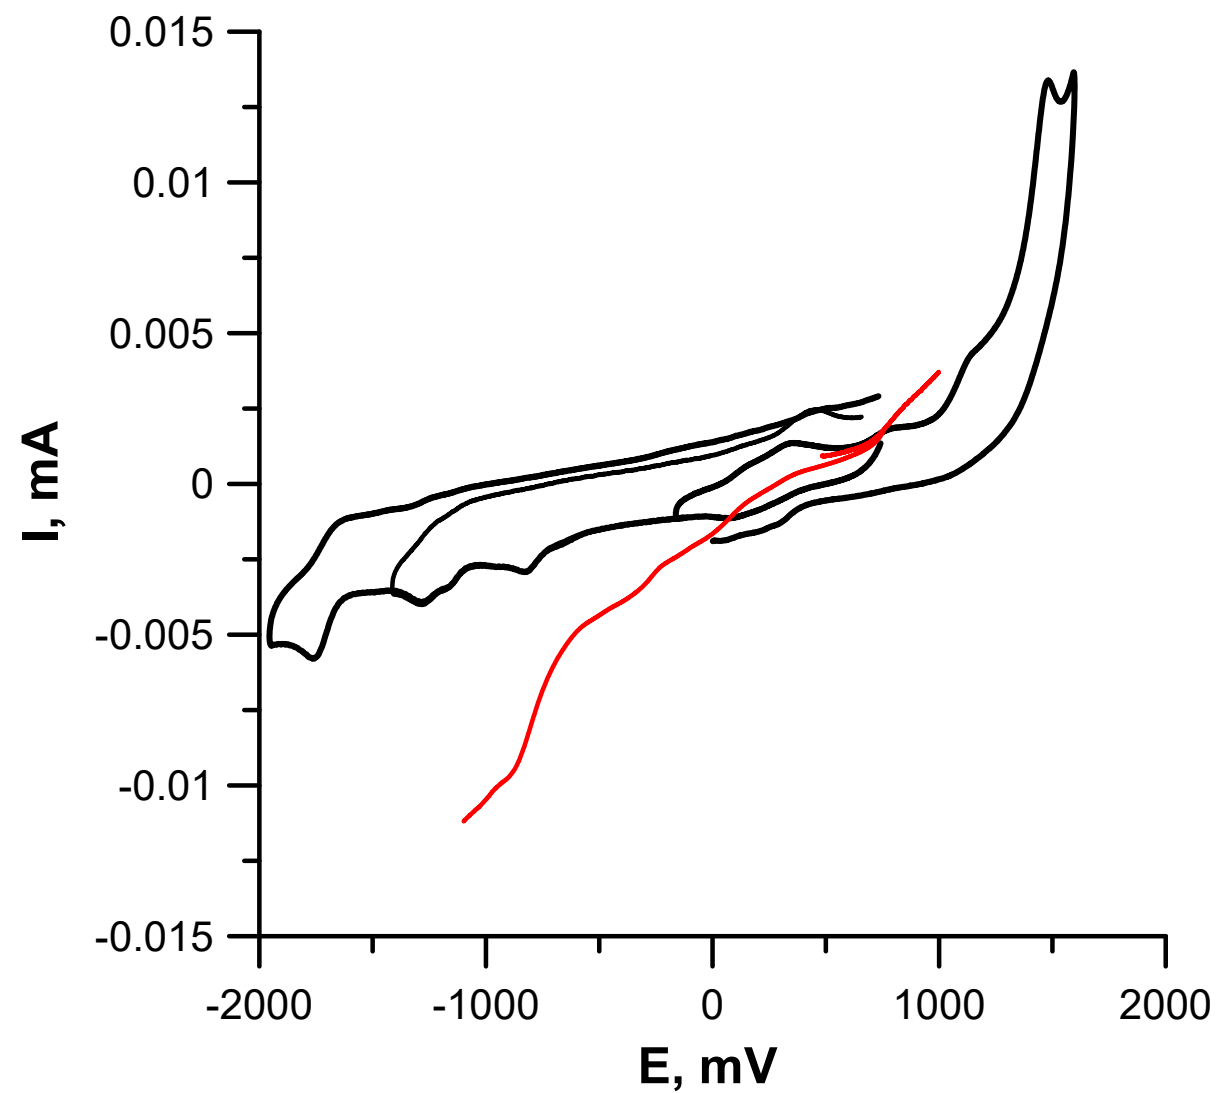

Figure 15S. Cyclic voltammograms (black) and RDE curves (color) of compound **6d**. DMF,  $5 \cdot 10^{-4}$ M, 0.1M  $\text{Bu}_4\text{NClO}_4$ .

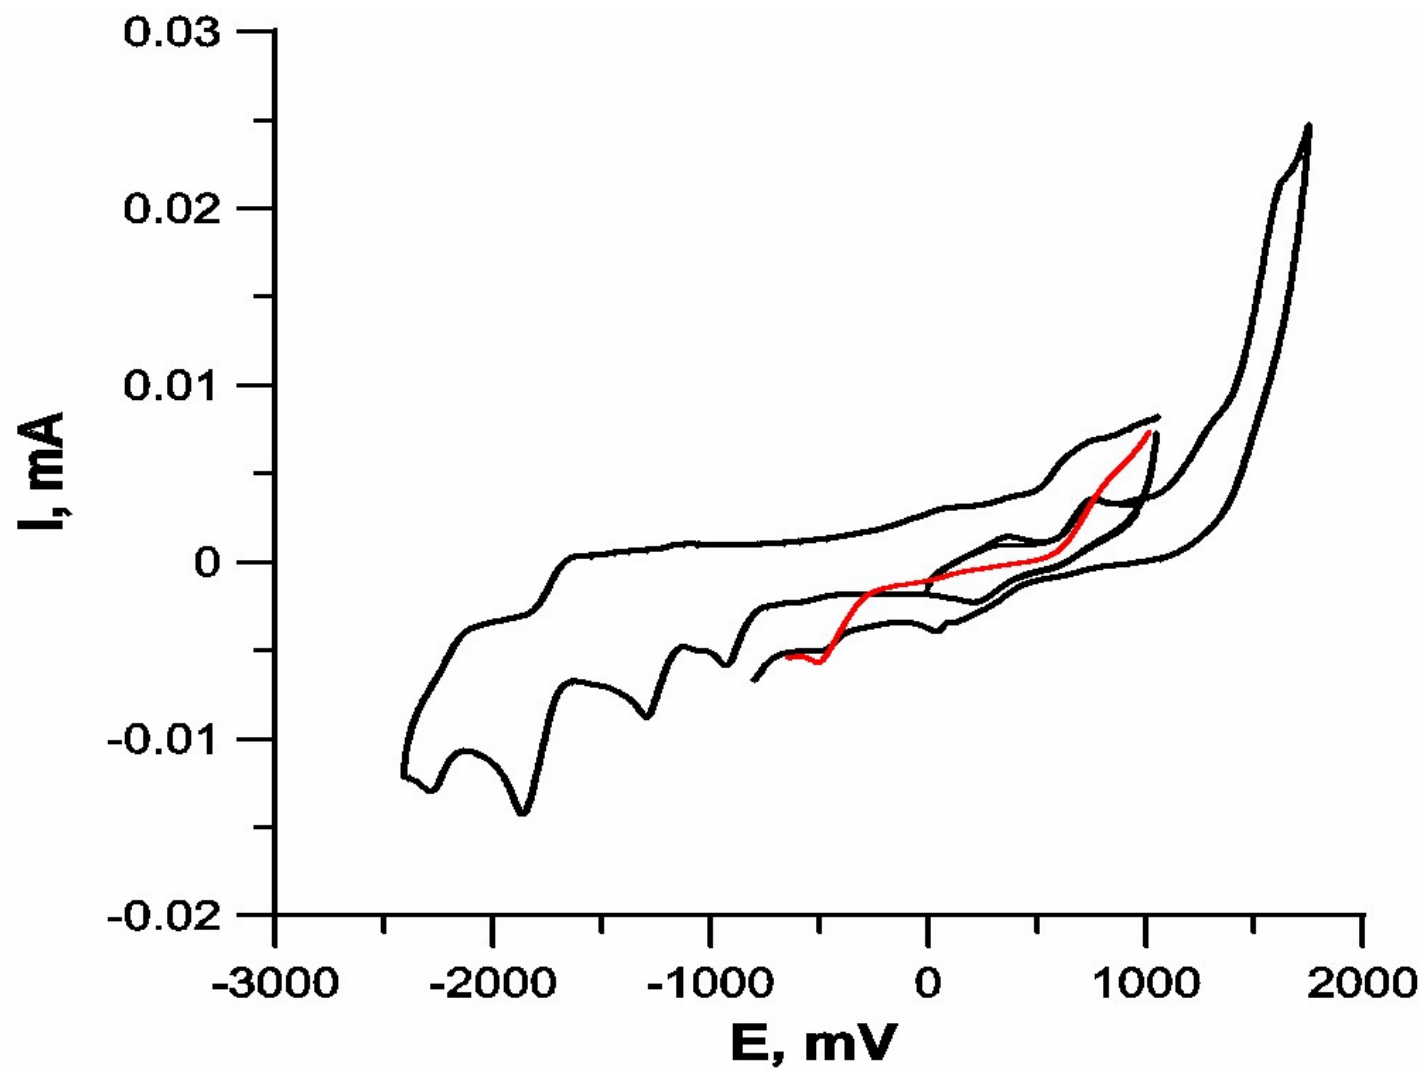

Figure 16S. Cyclic voltammograms (black) and RDE curves (color) of compound **6e**. DMF,  $5 \cdot 10^{-4}$ M, 0.1M  $\text{Bu}_4\text{NClO}_4$ .

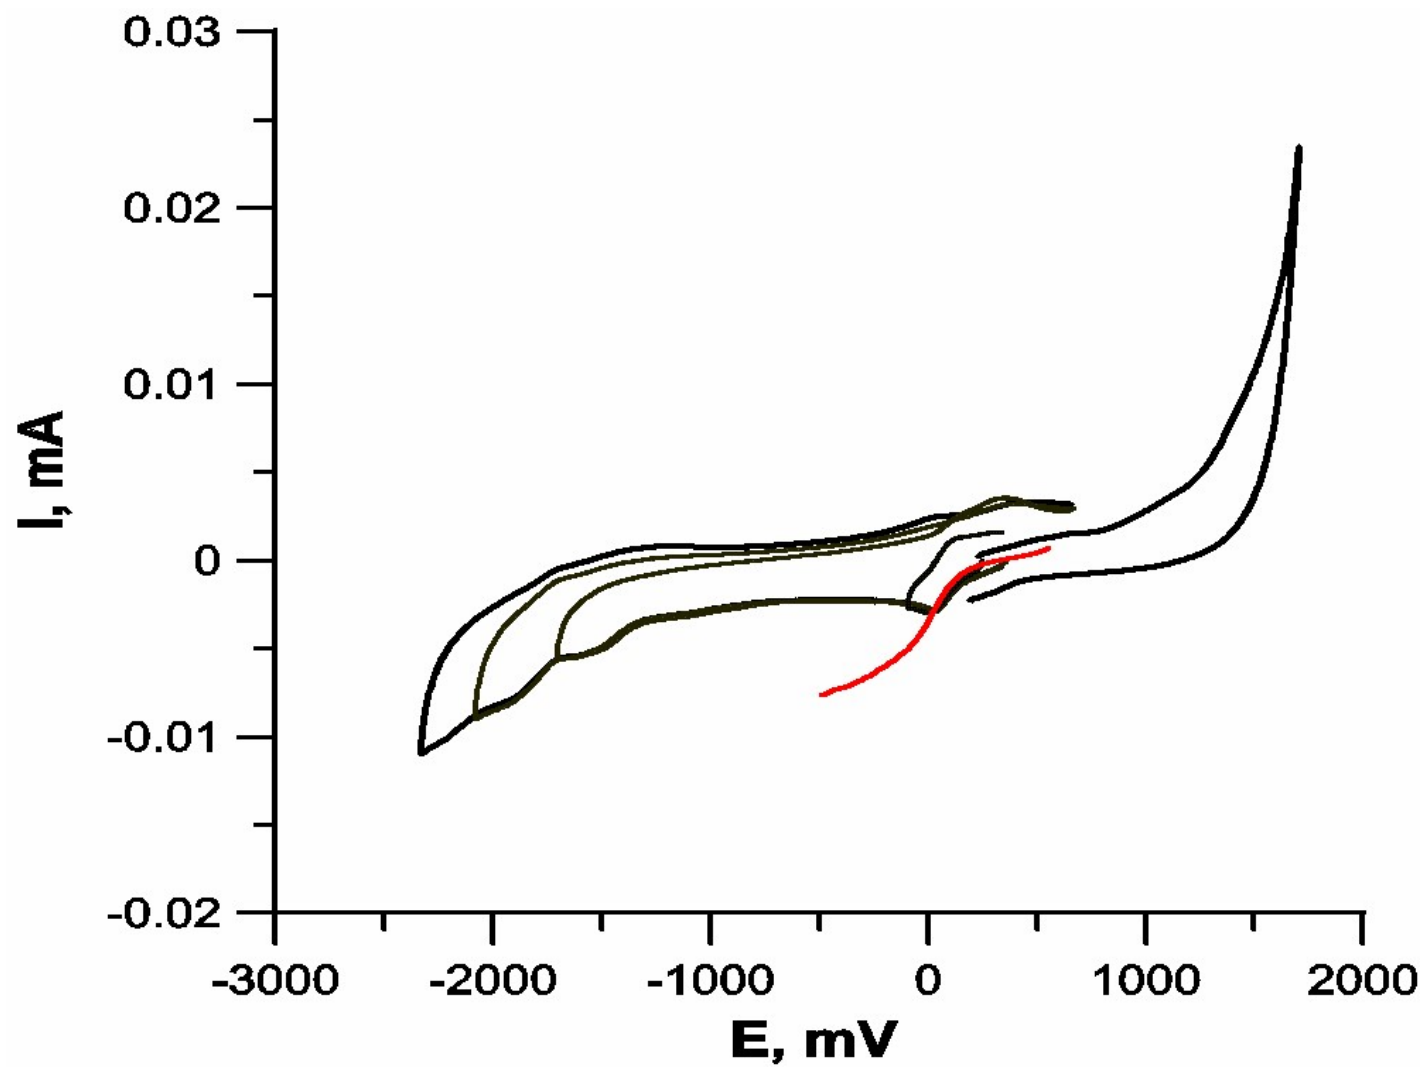

Figure 17S. Cyclic voltammograms (black) and RDE curves (color) of compound **6f**. DMF,  $5 \cdot 10^{-4}$ M, 0.1M  $\text{Bu}_4\text{NClO}_4$ .



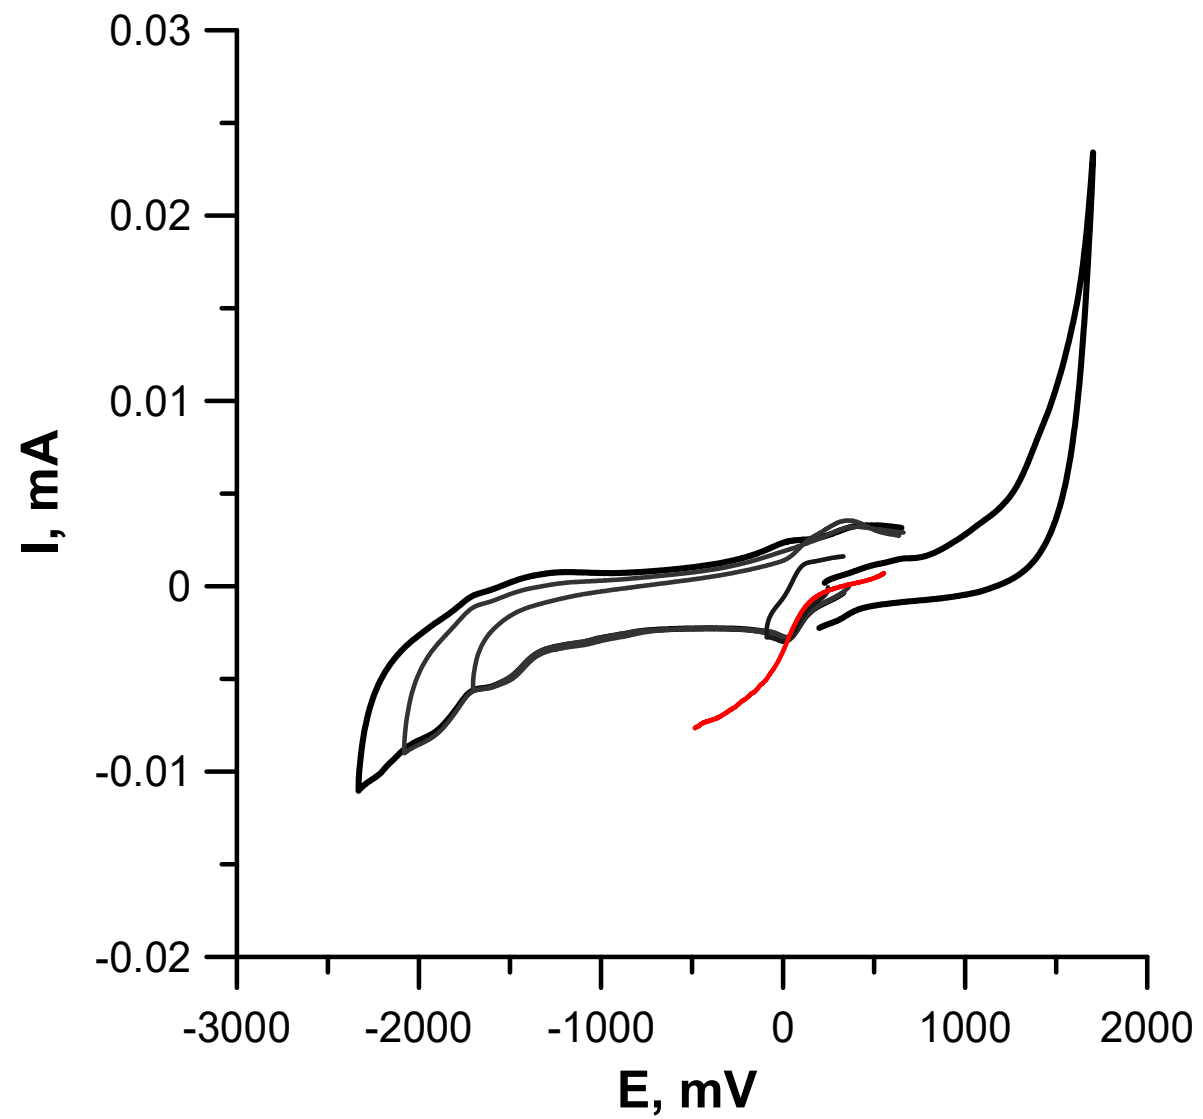

Figure 18S. Cyclic voltammograms (black) and RDE curves (color) of compound **6g**. DMF,  $5 \cdot 10^{-4}$ M, 0.1M  $\text{Bu}_4\text{NClO}_4$ .

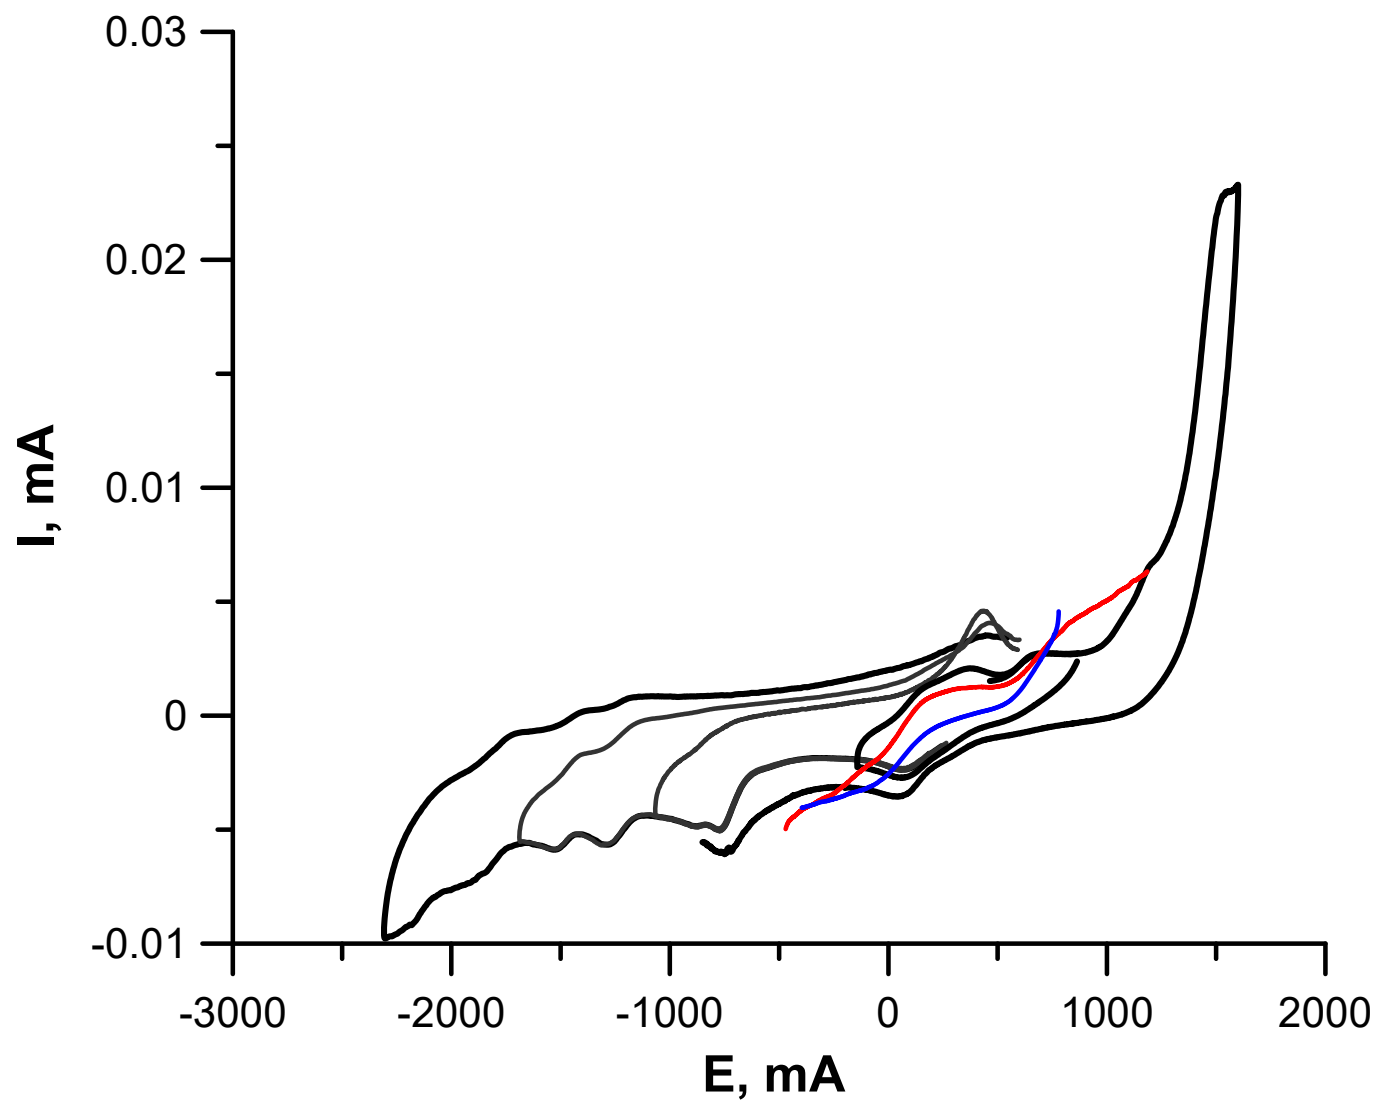

Figure 19S. Cyclic voltammograms (black) and RDE curves (color) of compound **6h**. DMF,  $5 \cdot 10^{-4}$ M, 0.1M Bu<sub>4</sub>NClO<sub>4</sub>.

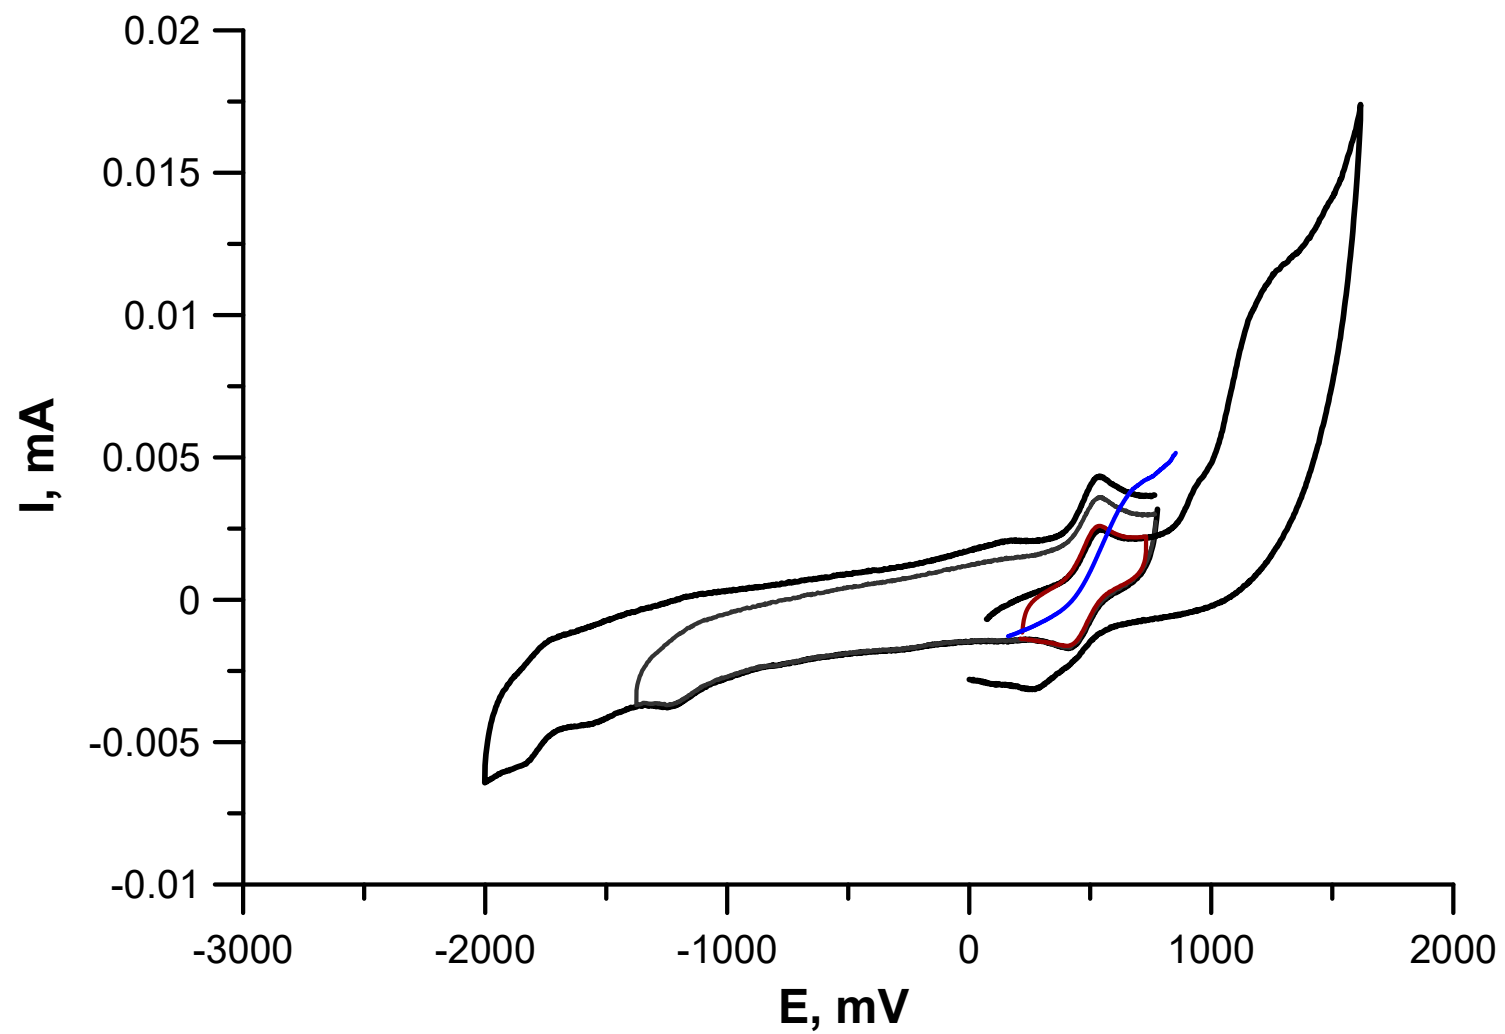

Figure 20S. Cyclic voltammograms (black) and RDE curves (color) of compound **6i**. DMF,  $5 \cdot 10^{-4}$ M, 0.1M  $\text{Bu}_4\text{NClO}_4$ .

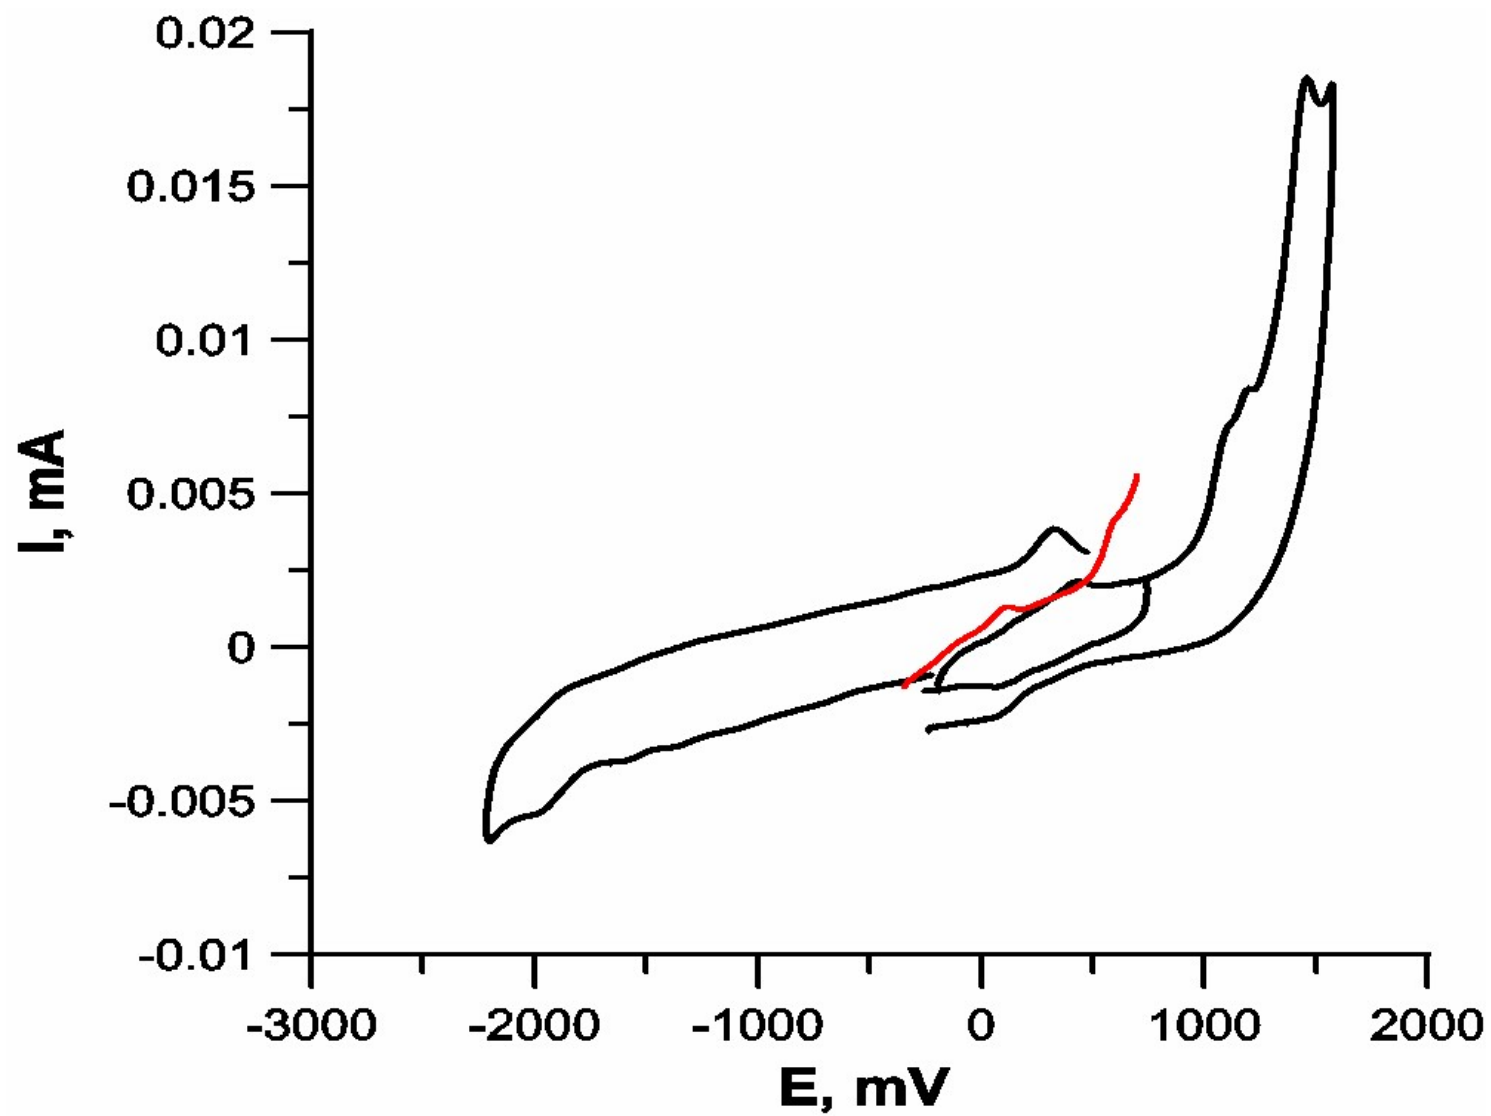

Figure 21S. Cyclic voltammograms (black) and RDE curves (color) of compound **6j**. DMF,  $5 \cdot 10^{-4}$ M, 0.1M Bu<sub>4</sub>NClO<sub>4</sub>.

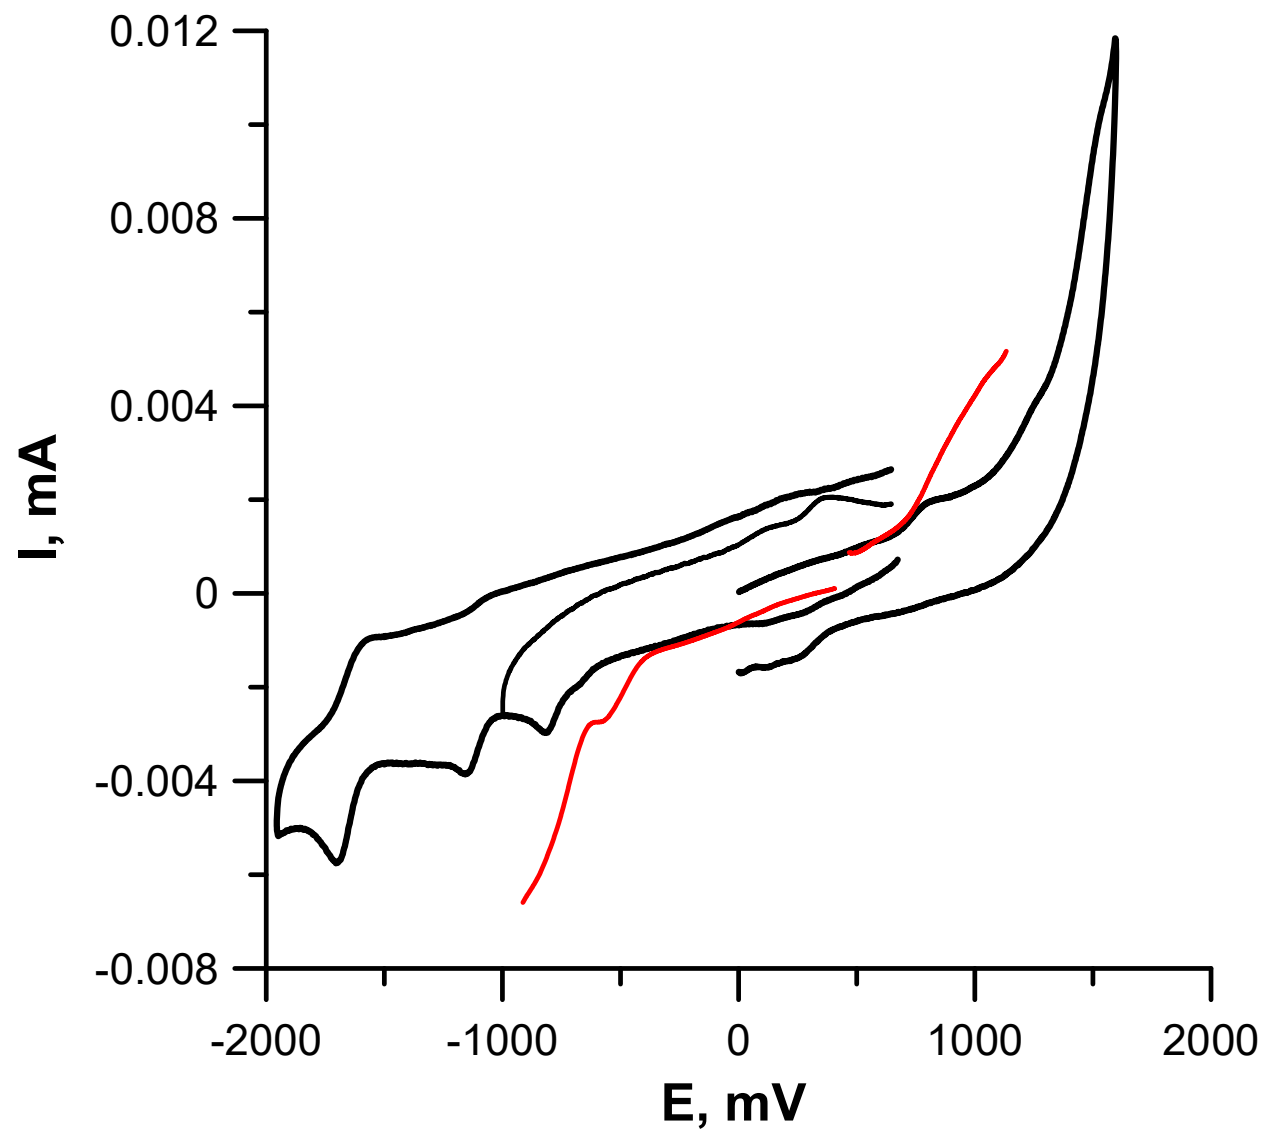

Figure 22S. Cyclic voltammograms (black) and RDE curves (color) of compound **6k**. DMF,  $5 \cdot 10^{-4}$ M, 0.1M  $\text{Bu}_4\text{NClO}_4$ .

**Table 1S.** Electrochemical reduction ( $E^{\text{Red}}$ ) and oxidation ( $E^{\text{Ox}}$ ) potentials of ligands and complexes on a GC electrode measured relative to Ag/AgCl/KCl(sat.). DMF,  $5 \cdot 10^{-4}$ M, 0.1M Bu<sub>4</sub>NClO<sub>4</sub>.  $E_p$  is the peak potential. Potential scan rate is 100 mV s<sup>-1</sup>.

| Compound | $E_p^{\text{Red}}$ (V)                       | $E_p^{\text{Ox}}$ (V)       | Oxidation state of copper in the main product | Oxidation state of copper in the minor product                                |
|----------|----------------------------------------------|-----------------------------|-----------------------------------------------|-------------------------------------------------------------------------------|
| 5a       | 0.38/0.55; -0.88; -1.17; -1.42; 1.80; -2.14  | 0.55/0.38; 1.13; 1.29; 1.5  | Cu <sup>+1</sup> Cu <sup>+2</sup>             | -                                                                             |
| 6a       | 0.35/0.58; -0.79; -1.10; -1.68               | 1.29; 1.61                  | Cu <sup>+2</sup>                              | -                                                                             |
| 5b       | -1.31; -1.77/-1.62; -2.13/-1.93              | 0.55/0.38; 1.37; 1.44       | Cu <sup>+1</sup> Cu <sup>+1</sup>             | Cu <sup>+1</sup> Cu <sup>+2</sup><br>or/and Cu <sup>+2</sup> Cu <sup>+2</sup> |
| 6b       | -0.75; -1.09; -1.65; -2.00                   | 0.81/0.34; 1.18; 1.55       | Cu <sup>+1</sup>                              | -                                                                             |
| 5c       | -1.08; -1.59/-1.50; -2.04                    | 0.58/0.29; 1.14; 1.57       | Cu <sup>+1</sup> Cu <sup>+1</sup>             | Cu <sup>+1</sup> Cu <sup>+2</sup> or/and Cu <sup>+2</sup> Cu <sup>+2</sup>    |
| 6c       | -1.22; -1.48; -1.78; -2.19                   | 0.43/0.09                   | Cu <sup>+1</sup>                              | -                                                                             |
| 5e       | -1.13; -1.46; -1.90; -1.26                   | 0.60/0.35; 1.41; 1.54       | Cu <sup>+1</sup> Cu <sup>+1</sup>             | Cu <sup>+1</sup> Cu <sup>+2</sup> or/and Cu <sup>+2</sup> Cu <sup>+2</sup>    |
| 6d       | 0.35/0.60; -0.75; -1.43; -1.94/-1.68         | -1.09; 1.41; 1.54           | Cu <sup>+2</sup>                              | -                                                                             |
| 5d       | 0.38/0.58; -0.94; -1.87/-1.69; -2.28         | 0.58/0.38; 1.04; 1.46       | Cu <sup>+1</sup> Cu <sup>+2</sup>             | Cu <sup>+2</sup> Cu <sup>+2</sup>                                             |
| 6e       | -0.92; -1.29; -1.87/-1.7; -2.28/-2.15        | 0.59/0.34; 1.25; 1.58       | Cu <sup>+1</sup>                              | -                                                                             |
| 5f       | 0.53/0.61; -0.99; -1.34; -1.81               | 0.61/0.53; 0.99; 1.29; 1.44 | Cu <sup>+1</sup> Cu <sup>+2</sup>             | -                                                                             |
| 6f       | 0.07/0.34; -1.16; -1.27; -1.75               | 1.13                        | Cu <sup>+2</sup>                              | -                                                                             |
| 5g       | 0.41/0.53; -1.22; -1.53; -1.83               | 0.53/0.41; 0.93; 1.2        | Cu <sup>+1</sup> Cu <sup>+2</sup>             | -                                                                             |
| 6g       | 0.03/0.11; -1.49; -1.59; -1.91; -2.20        | 1.41                        | Cu <sup>+2</sup>                              | -                                                                             |
| 5h       | 0.06/0.38; -1.30; -1.57; -2.23               | 0.38/0.06; 1.12; 1.34       | Cu <sup>+1</sup> Cu <sup>+2</sup>             | -                                                                             |
| 6h       | 0.05/0.42; -0.76; -1.27; -1.51; -1.88; -2.17 | 0.78; 1.21                  | Cu <sup>+2</sup>                              | Cu <sup>+1</sup>                                                              |
| 5i       | 0.40/0.55; -1.30; -1.60; -1.87               | 0.94; 1.20; 1.51            | Cu <sup>+2</sup> Cu <sup>+2</sup>             | Cu <sup>+1</sup> Cu <sup>+2</sup> or/and Cu <sup>+1</sup> Cu <sup>+1</sup>    |
| 6i       | 0.43/0.50; -1.18; -1.58; -1.89               | 0.96; 1.20                  | Cu <sup>+2</sup>                              | Cu <sup>+1</sup>                                                              |
| 5j       | 0.48/0.59; -1.92-2.31                        | 0.59/0.48; 1.37             | Cu <sup>+1</sup> Cu <sup>+2</sup>             | Cu <sup>+2</sup> Cu <sup>+2</sup>                                             |
| 6j       | 0.08/0.41; -0.69; -1.09; -1.37; -1.57; -1.98 | 1.25; 1.52                  | Cu <sup>+2</sup>                              | Cu <sup>+1</sup>                                                              |
| 5k       | 0.42/0.06; -0.75; -1.32; -1.63; -2.24        | 1.03; 1.25                  | Cu <sup>+2</sup> Cu <sup>+2</sup>             | Cu <sup>+1</sup> Cu <sup>+2</sup>                                             |
| 6k       | 0.47/0.32; -0.81; -1.19; -1.69               | 0.87; 1.32                  | Cu <sup>+2</sup>                              | Cu <sup>+1</sup>                                                              |

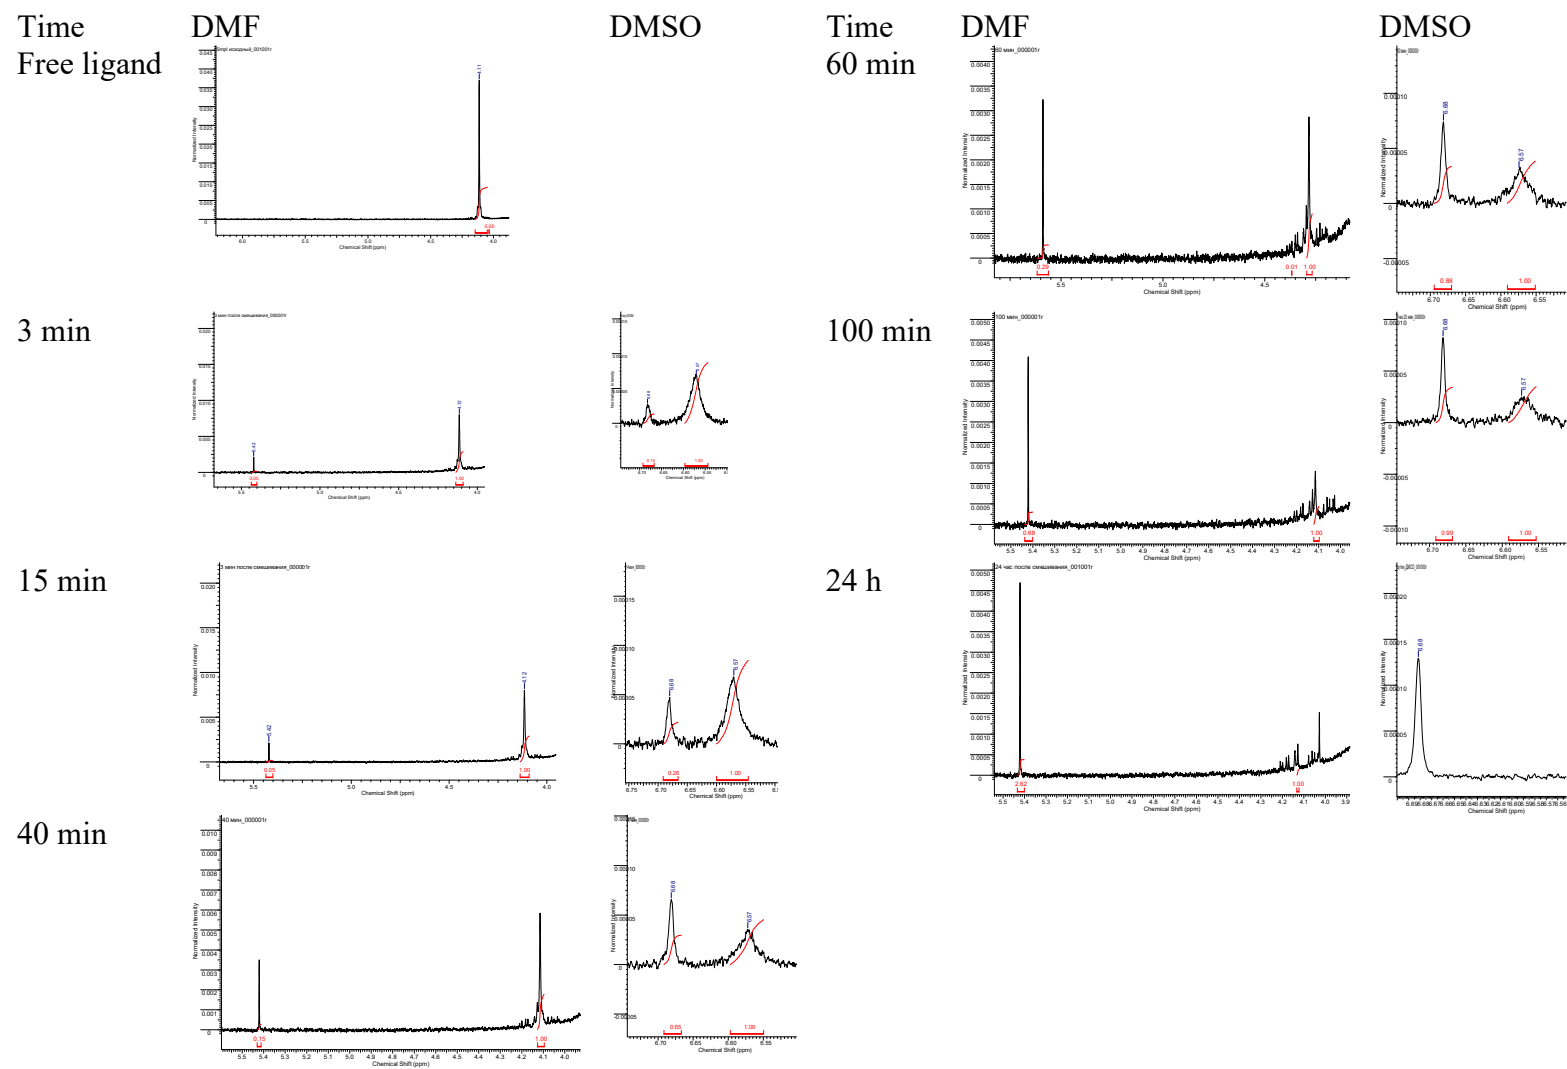

Figure 23S.  $^1\text{H}$  NMR monitoring of the reaction mixture of ligand **4c** with  $\text{CuCl}_2 \cdot 2\text{H}_2\text{O}$  in DMF and DMSO.

**AT:**

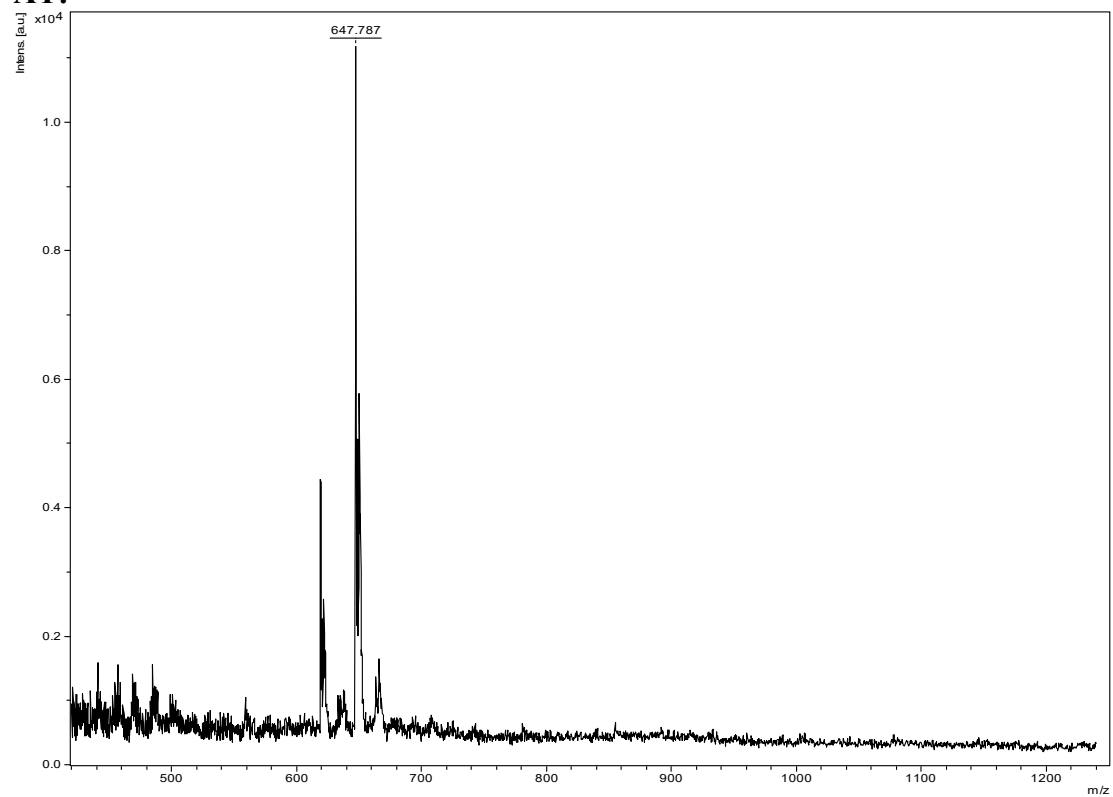

**DHB:**

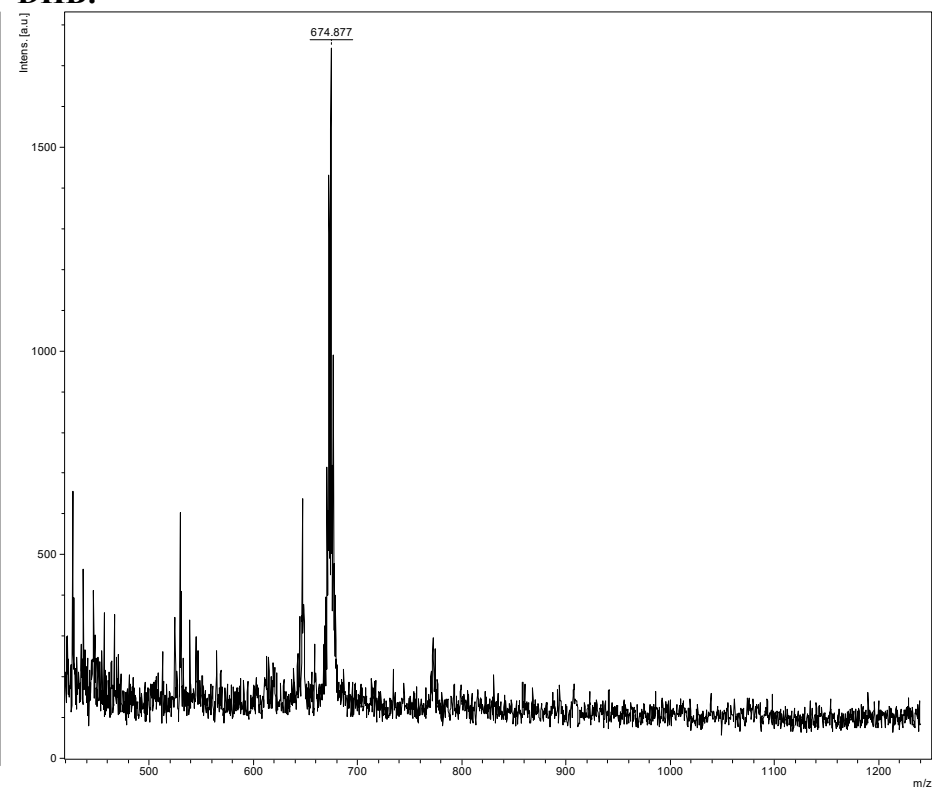



### Fluorene:

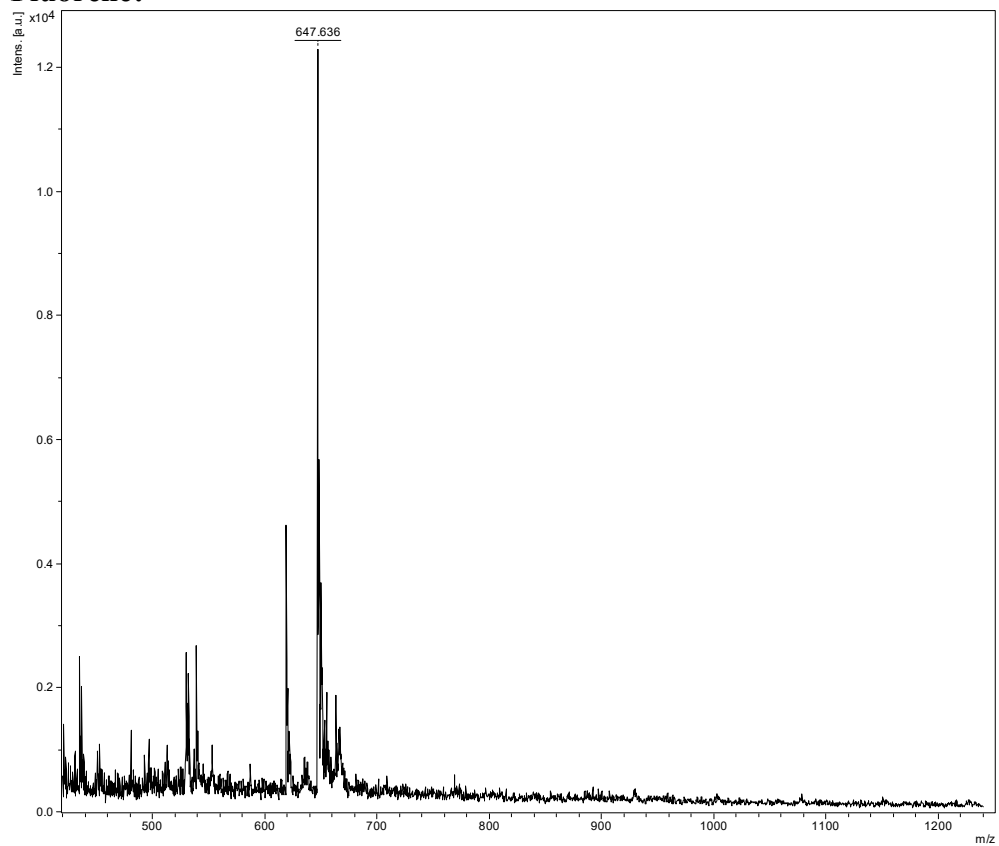

### Phen:

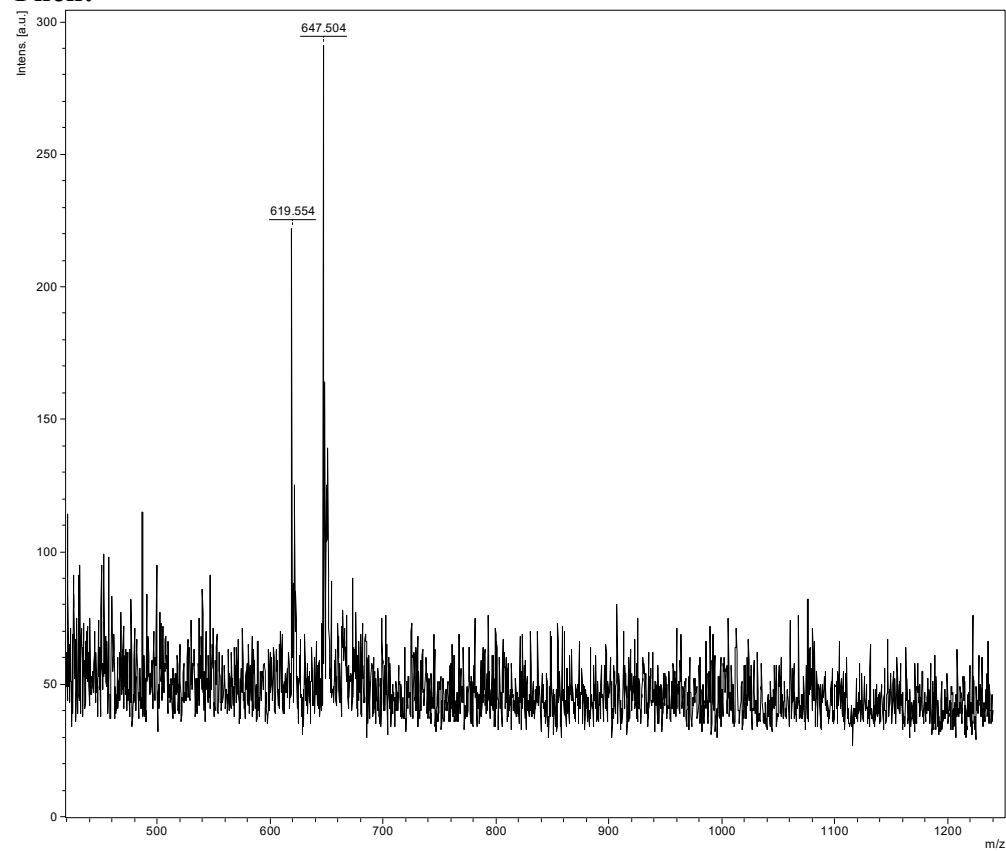

### Anthracene:

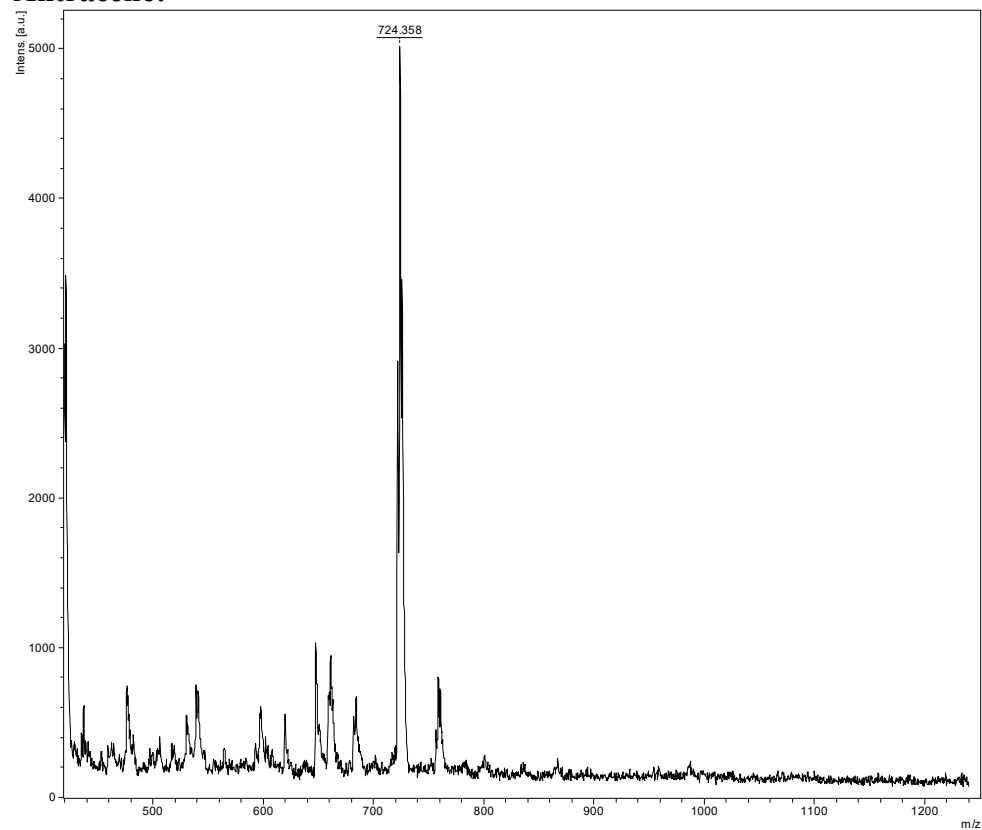

### AT:

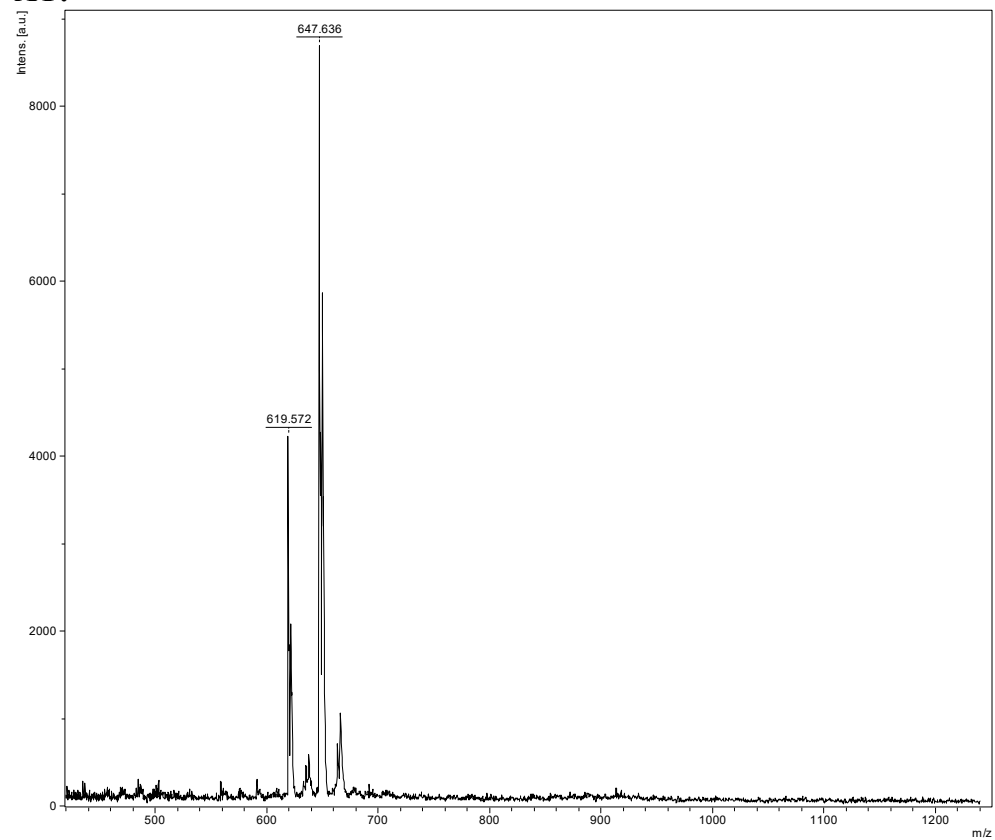

**DCTB:**

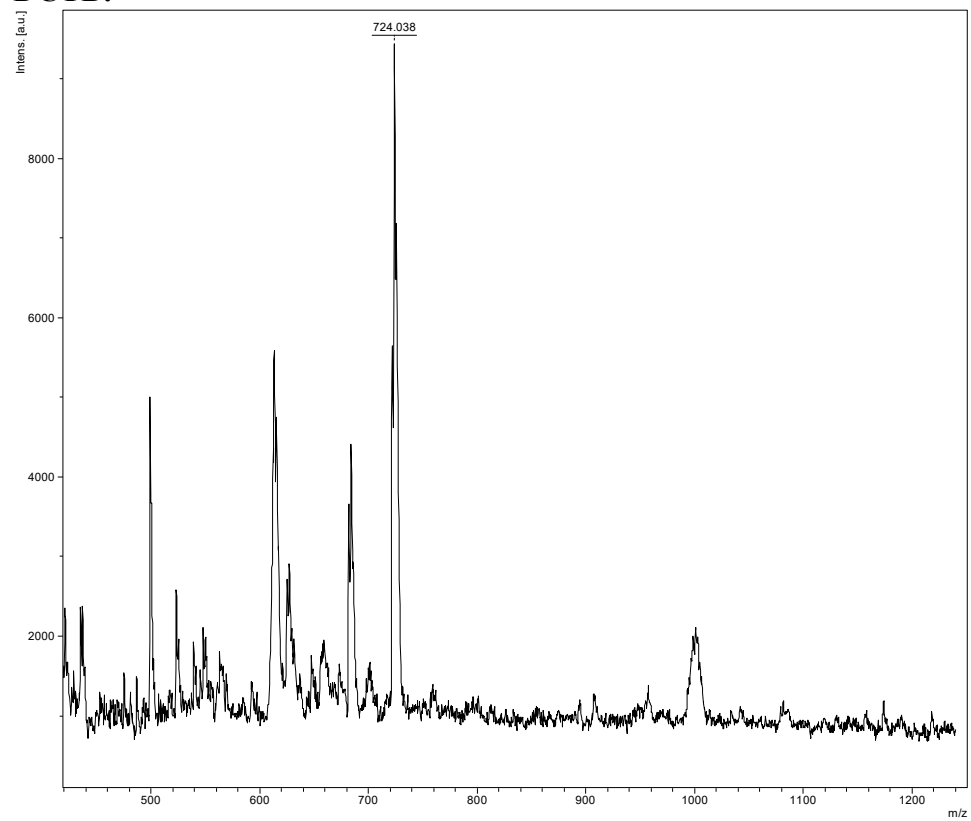

**WM:**

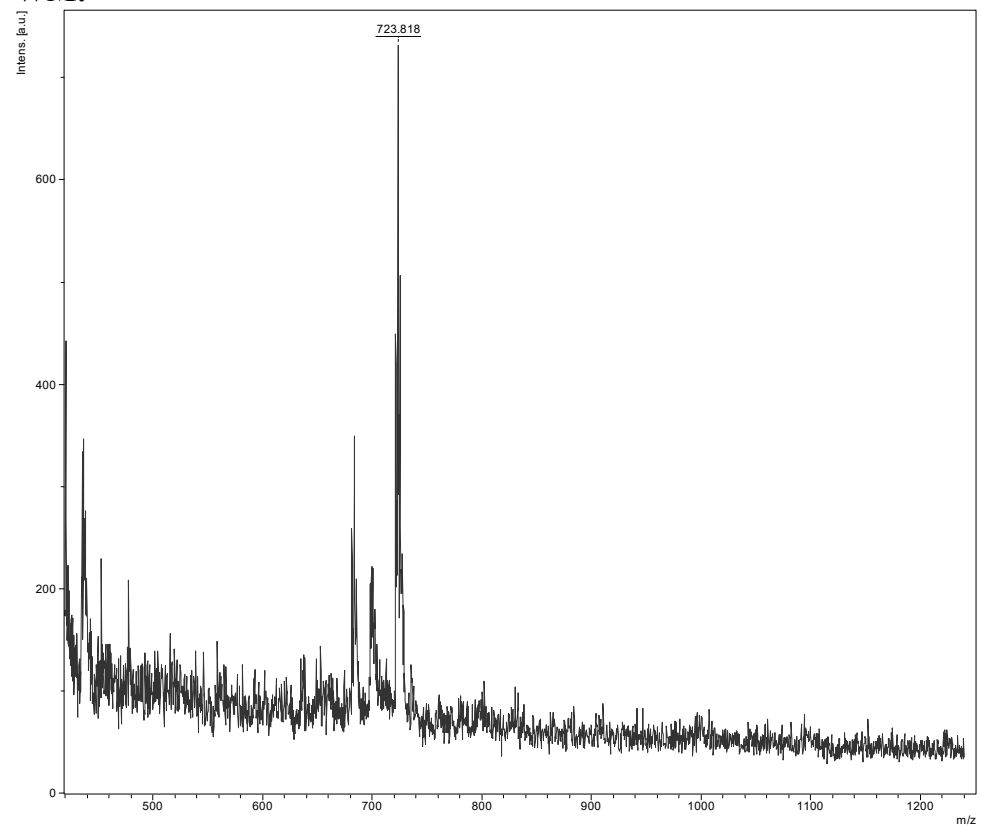

Figure 24S. MALDI spectra of complex **5c** on different matrices

## X-Ray analysis

Table 2S. Crystal data and structure refinement for **4d** (CCDC 2017202).

| Parameter                            | <b>4d</b> (CCDC 2017202)                                      |                                                                         |
|--------------------------------------|---------------------------------------------------------------|-------------------------------------------------------------------------|
| Empirical formula                    | C <sub>13</sub> H <sub>12</sub> N <sub>3</sub> OSe            |                                                                         |
| Formula weight                       | 305.22                                                        |                                                                         |
| Temperature                          | 293(2) K                                                      |                                                                         |
| Wavelength                           | 1.54186 E                                                     |                                                                         |
| Crystal system                       | Monoclinic                                                    |                                                                         |
| Space group                          | P 21/c                                                        |                                                                         |
| Unit cell dimensions                 | $a = 6.8328(2)$ E<br>$b = 14.7453(3)$ E<br>$c = 12.9522(2)$ E | $\alpha = 90^\circ$<br>$\beta = 99.188(2)^\circ$<br>$\gamma = 90^\circ$ |
| Volume                               | 1288.21(5) E <sup>3</sup>                                     |                                                                         |
| Z                                    | 4                                                             |                                                                         |
| Density (calculated)                 | 1.574 Mg/m <sup>3</sup>                                       |                                                                         |
| Absorption coefficient               | 3.881 mm <sup>-1</sup>                                        |                                                                         |
| $F(000)$                             | 612                                                           |                                                                         |
| Theta range for data collection.     | 4.577 to 70.496°                                              |                                                                         |
| Index ranges                         | -8 ≤ h ≤ 6<br>-14 ≤ k ≤ 17<br>-15 ≤ l ≤ 15                    |                                                                         |
| Reflections collected                | 13255                                                         |                                                                         |
| Independent reflections              | 2441 [R <sub>(int)</sub> = 0.0441]                            |                                                                         |
| Completeness to theta = 66.638°      | 99.6 %                                                        |                                                                         |
| Refinement method                    | Full-matrix least-squares on F <sup>2</sup>                   |                                                                         |
| Data / restraints / parameters       | 2441 / 6 / 200                                                |                                                                         |
| Goodness-of-fit on F <sup>2</sup>    | 1.038                                                         |                                                                         |
| Final R indices [ $I > 2\sigma(I)$ ] | R <sub>1</sub> = 0.0415, wR <sub>2</sub> = 0.1157             |                                                                         |
| R indices (all data)                 | R <sub>1</sub> = 0.0568, wR <sub>2</sub> = 0.1229             |                                                                         |
| Extinction coefficient               | 0.0014(4)                                                     |                                                                         |
| Largest diff. peak and hole          | 0.825 and -0.502 e. E <sup>-3</sup>                           |                                                                         |

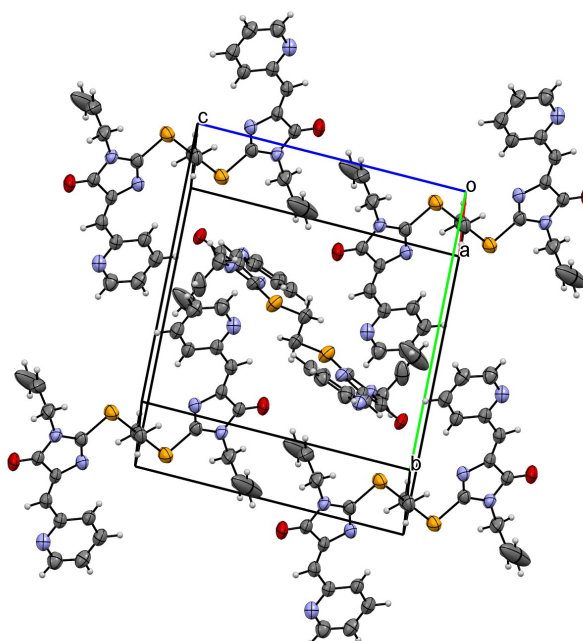

Table 3S. Bond lengths [Å] and angles [°] for **4d**.

|                  |           |                      |          |
|------------------|-----------|----------------------|----------|
| Se(1)-C(3)       | 1.884(3)  | N(4)-C(3)-Se(1)      | 125.3(2) |
| Se(1)-C(16)      | 1.963(4)  | N(2)-C(3)-Se(1)      | 119.8(2) |
| O(1)-C(1)        | 1.215(4)  | C(6)-C(5)-N(4)       | 128.9(3) |
| N(2)-C(3)        | 1.384(4)  | C(6)-C(5)-C(1)       | 122.2(3) |
| N(2)-C(1)        | 1.385(4)  | N(4)-C(5)-C(1)       | 108.9(3) |
| N(2)-C(13)       | 1.459(4)  | C(5)-C(6)-C(7)       | 129.3(3) |
| N(4)-C(3)        | 1.300(4)  | C(5)-C(6)-H(6)       | 116(2)   |
| N(4)-C(5)        | 1.401(4)  | C(7)-C(6)-H(6)       | 114(2)   |
| N(12)-C(11)      | 1.339(5)  | N(12)-C(7)-C(8)      | 121.9(3) |
| N(12)-C(7)       | 1.348(4)  | N(12)-C(7)-C(6)      | 114.1(3) |
| C(1)-C(5)        | 1.482(4)  | C(8)-C(7)-C(6)       | 124.0(3) |
| C(5)-C(6)        | 1.342(5)  | C(9)-C(8)-C(7)       | 119.2(3) |
| C(6)-C(7)        | 1.457(4)  | C(9)-C(8)-H(8)       | 122(3)   |
| C(6)-H(6)        | 0.93(4)   | C(7)-C(8)-H(8)       | 119(3)   |
| C(7)-C(8)        | 1.399(5)  | C(10)-C(9)-C(8)      | 119.1(3) |
| C(8)-C(9)        | 1.377(5)  | C(10)-C(9)-H(9)      | 121(2)   |
| C(8)-H(8)        | 0.87(4)   | C(8)-C(9)-H(9)       | 120(2)   |
| C(9)-C(10)       | 1.369(6)  | C(9)-C(10)-C(11)     | 118.6(4) |
| C(9)-H(9)        | 0.99(4)   | C(9)-C(10)-H(10)     | 119(3)   |
| C(10)-C(11)      | 1.381(6)  | C(11)-C(10)-H(10)    | 122(3)   |
| C(10)-H(10)      | 0.93(5)   | N(12)-C(11)-C(10)    | 123.9(4) |
| C(11)-H(11)      | 0.94(4)   | N(12)-C(11)-H(11)    | 115(3)   |
| C(13)-C(14)      | 1.476(6)  | C(10)-C(11)-H(11)    | 121(3)   |
| C(13)-H(131)     | 0.95(5)   | N(2)-C(13)-C(14)     | 112.9(4) |
| C(13)-H(132)     | 0.97(4)   | N(2)-C(13)-H(131)    | 106(3)   |
| C(14)-C(15)      | 1.087(9)  | C(14)-C(13)-H(131)   | 111(3)   |
| C(14)-H(14)      | 0.9300    | N(2)-C(13)-H(132)    | 109(2)   |
| C(15)-H(15A)     | 0.9300    | C(14)-C(13)-H(132)   | 112(2)   |
| C(15)-H(15B)     | 0.9300    | H(131)-C(13)-H(132)  | 105(4)   |
| C(16)-C(16)#1    | 1.506(9)  | C(15)-C(14)-C(13)    | 136.6(7) |
| C(16)-H(161)     | 1.06(5)   | C(15)-C(14)-H(14)    | 111.7    |
| C(16)-H(162)     | 0.98(4)   | C(13)-C(14)-H(14)    | 111.7    |
| C(3)-Se(1)-C(16) | 95.96(16) | C(14)-C(15)-H(15A)   | 120.0    |
| C(3)-N(2)-C(1)   | 107.3(3)  | C(14)-C(15)-H(15B)   | 120.0    |
| C(3)-N(2)-C(13)  | 127.8(3)  | H(15A)-C(15)-H(15B)  | 120.0    |
| C(1)-N(2)-C(13)  | 124.9(3)  | C(16)#1-C(16)-Se(1)  | 110.8(4) |
| C(3)-N(4)-C(5)   | 105.3(3)  | C(16)#1-C(16)-H(161) | 116(2)   |
| C(11)-N(12)-C(7) | 117.2(3)  | Se(1)-C(16)-H(161)   | 96(2)    |
| O(1)-C(1)-N(2)   | 125.6(3)  | C(16)#1-C(16)-H(162) | 118(2)   |
| O(1)-C(1)-C(5)   | 130.8(3)  | Se(1)-C(16)-H(162)   | 101(2)   |
| N(2)-C(1)-C(5)   | 103.6(2)  | H(161)-C(16)-H(162)  | 110(3)   |
| N(4)-C(3)-N(2)   | 114.9(3)  |                      |          |

Symmetry transformations used to generate equivalent atoms:

#1 -x+1,-y+1,-z+1

Table 4S. Torsion angles [°] for **4d**.

|                        |           |
|------------------------|-----------|
| C(3)-N(2)-C(1)-O(1)    | 179.8(3)  |
| C(13)-N(2)-C(1)-O(1)   | 0.2(5)    |
| C(3)-N(2)-C(1)-C(5)    | -0.4(3)   |
| C(13)-N(2)-C(1)-C(5)   | -180.0(3) |
| C(5)-N(4)-C(3)-N(2)    | 0.4(4)    |
| C(5)-N(4)-C(3)-Se(1)   | -177.5(2) |
| C(1)-N(2)-C(3)-N(4)    | 0.0(4)    |
| C(13)-N(2)-C(3)-N(4)   | 179.5(3)  |
| C(1)-N(2)-C(3)-Se(1)   | 178.1(2)  |
| C(13)-N(2)-C(3)-Se(1)  | -2.4(5)   |
| C(16)-Se(1)-C(3)-N(4)  | 7.4(3)    |
| C(16)-Se(1)-C(3)-N(2)  | -170.5(3) |
| C(3)-N(4)-C(5)-C(6)    | 178.5(3)  |
| C(3)-N(4)-C(5)-C(1)    | -0.7(3)   |
| O(1)-C(1)-C(5)-C(6)    | 1.2(5)    |
| N(2)-C(1)-C(5)-C(6)    | -178.6(3) |
| O(1)-C(1)-C(5)-N(4)    | -179.5(3) |
| N(2)-C(1)-C(5)-N(4)    | 0.7(3)    |
| N(4)-C(5)-C(6)-C(7)    | 0.8(6)    |
| C(1)-C(5)-C(6)-C(7)    | 179.9(3)  |
| C(11)-N(12)-C(7)-C(8)  | 0.2(5)    |
| C(11)-N(12)-C(7)-C(6)  | -178.9(3) |
| C(5)-C(6)-C(7)-N(12)   | 172.5(3)  |
| C(5)-C(6)-C(7)-C(8)    | -6.5(5)   |
| N(12)-C(7)-C(8)-C(9)   | -1.0(5)   |
| C(6)-C(7)-C(8)-C(9)    | 178.0(3)  |
| C(7)-C(8)-C(9)-C(10)   | 0.9(5)    |
| C(8)-C(9)-C(10)-C(11)  | 0.0(5)    |
| C(7)-N(12)-C(11)-C(10) | 0.8(5)    |
| C(9)-C(10)-C(11)-N(12) | -1.0(6)   |
| C(3)-N(2)-C(13)-C(14)  | -82.7(4)  |
| C(1)-N(2)-C(13)-C(14)  | 96.8(4)   |
| N(2)-C(13)-C(14)-C(15) | -13.5(11) |

Symmetry transformations used to generate equivalent atoms:

#1 -x+1,-y+1,-z+1

Table 5S. Hydrogen bonds for **4d** [E and °].

| D-H...A              | d(D-H)  | d(H...A) | d(D...A) | <(DHA) |
|----------------------|---------|----------|----------|--------|
| C(8)-H(8)...N(4)     | 0.87(4) | 2.47(4)  | 3.072(5) | 128(4) |
| C(10)-H(10)...O(1)#2 | 0.93(5) | 2.54(5)  | 3.275(4) | 137(3) |

Symmetry transformations used to generate equivalent atoms:

#1 -x+1,-y+1,-z+1 #2 x+1,-y+1/2,z-1/2

Table 6S. Crystal data and structure refinement for **5d** (CCDC 2064245).

| Parameter                            | <b>5d</b> (CCDC 2064245)                                                                                      |                                                                          |
|--------------------------------------|---------------------------------------------------------------------------------------------------------------|--------------------------------------------------------------------------|
| Empirical formula                    | C <sub>26</sub> H <sub>24</sub> Cl <sub>4</sub> Cu <sub>2</sub> N <sub>6</sub> O <sub>3</sub> Se <sub>2</sub> |                                                                          |
| Formula weight                       | 895.31                                                                                                        |                                                                          |
| Temperature                          | 295(2) K                                                                                                      |                                                                          |
| Wavelength                           | 1.54186 Å                                                                                                     |                                                                          |
| Crystal system                       | Monoclinic                                                                                                    |                                                                          |
| Space group                          | C 2/c                                                                                                         |                                                                          |
| Unit cell dimensions                 | $a = 12.6876(9)$ Å<br>$b = 27.208(2)$ Å<br>$c = 9.5136(8)$ Å                                                  | $\alpha = 90^\circ$<br>$\beta = 100.228(4)^\circ$<br>$\gamma = 90^\circ$ |
| Volume                               | 3231.9(4) Å <sup>3</sup>                                                                                      |                                                                          |
| Z                                    | 4                                                                                                             |                                                                          |
| Density (calculated)                 | 1.840 Mg/m <sup>3</sup>                                                                                       |                                                                          |
| Absorption coefficient               | 7.575 mm <sup>-1</sup>                                                                                        |                                                                          |
| $F(000)$                             | 1760                                                                                                          |                                                                          |
| Theta range for data collection.     | 5.620 to 66.990°                                                                                              |                                                                          |
| Index ranges                         | -15 ≤ h ≤ 14<br>-32 ≤ k ≤ 15<br>-10 ≤ l ≤ 11                                                                  |                                                                          |
| Reflections collected                | 11381                                                                                                         |                                                                          |
| Independent reflections              | 2846 [ $R_{\text{int}} = 0.1509$ ]                                                                            |                                                                          |
| Completeness to theta = 66.690°      | 98.5 %                                                                                                        |                                                                          |
| Refinement method                    | Full-matrix least-squares on $F^2$                                                                            |                                                                          |
| Data / restraints / parameters       | 2846 / 1 / 192                                                                                                |                                                                          |
| Goodness-of-fit on $F^2$             | 0.818                                                                                                         |                                                                          |
| Final R indices [ $I > 2\sigma(I)$ ] | $R_1 = 0.0855$ , $wR_2 = 0.2145$                                                                              |                                                                          |
| R indices (all data)                 | $R_1 = 0.1688$ , $wR_2 = 0.2654$                                                                              |                                                                          |
| Extinction coefficient               | 0.00049(13)                                                                                                   |                                                                          |
| Largest diff. peak and hole          | 0.638 and -0.968 e.Å <sup>-3</sup>                                                                            |                                                                          |

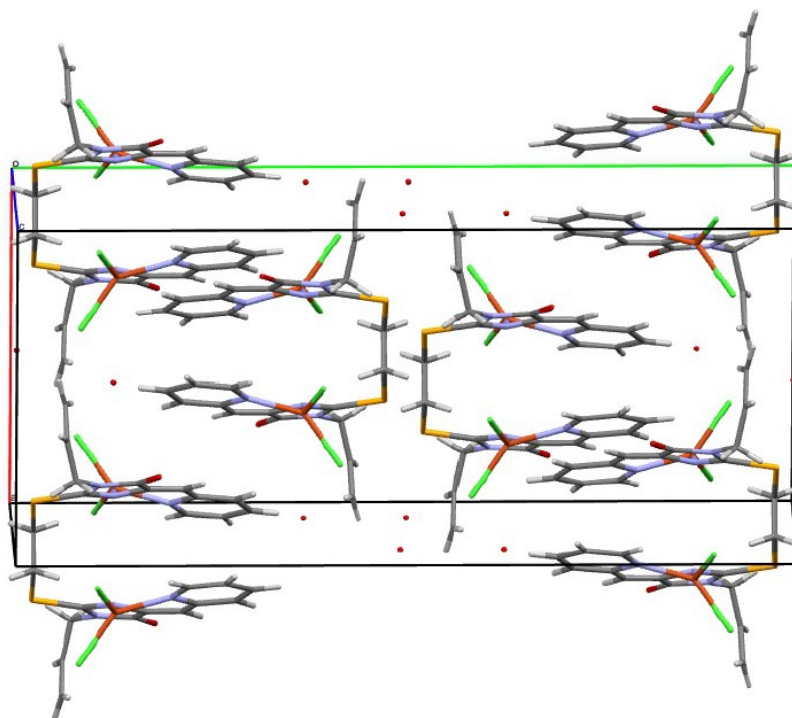

Table 7S. Bond lengths [Å] and angles [°] for **5d**.

|                   |           |                      |           |
|-------------------|-----------|----------------------|-----------|
| Se(1)-C(4)        | 1.828(14) | C(10)-N(3)-Cu(1)     | 119.1(10) |
| Se(1)-C(14)       | 1.938(14) | C(6)-N(3)-Cu(1)      | 122.9(8)  |
| Cu(1)-N(2)        | 1.992(9)  | O(1)-C(2)-N(1)       | 125.3(11) |
| Cu(1)-N(3)        | 2.044(11) | O(1)-C(2)-C(3)       | 129.7(13) |
| Cu(1)-Cl(1)       | 2.199(3)  | N(1)-C(2)-C(3)       | 105.0(10) |
| Cu(1)-Cl(2)       | 2.200(4)  | C(5)-C(3)-N(2)       | 130.7(10) |
| O(1)-C(2)         | 1.235(13) | C(5)-C(3)-C(2)       | 123.3(12) |
| N(1)-C(2)         | 1.353(15) | N(2)-C(3)-C(2)       | 105.9(11) |
| N(1)-C(4)         | 1.395(14) | N(2)-C(4)-N(1)       | 109.3(11) |
| N(1)-C(11)        | 1.483(15) | N(2)-C(4)-Se(1)      | 130.9(9)  |
| N(2)-C(4)         | 1.322(14) | N(1)-C(4)-Se(1)      | 119.8(9)  |
| N(2)-C(3)         | 1.405(15) | C(3)-C(5)-C(6)       | 127.1(11) |
| N(3)-C(10)        | 1.358(16) | C(3)-C(5)-H(5)       | 116.4     |
| N(3)-C(6)         | 1.374(16) | C(6)-C(5)-H(5)       | 116.4     |
| C(2)-C(3)         | 1.480(15) | N(3)-C(6)-C(7)       | 120.5(11) |
| C(3)-C(5)         | 1.318(15) | N(3)-C(6)-C(5)       | 121.0(11) |
| C(5)-C(6)         | 1.431(17) | C(7)-C(6)-C(5)       | 118.4(12) |
| C(5)-H(5)         | 0.9300    | C(8)-C(7)-C(6)       | 121.7(13) |
| C(6)-C(7)         | 1.405(17) | C(8)-C(7)-H(7)       | 119.1     |
| C(7)-C(8)         | 1.380(18) | C(6)-C(7)-H(7)       | 119.1     |
| C(7)-H(7)         | 0.9300    | C(7)-C(8)-C(9)       | 115.3(14) |
| C(8)-C(9)         | 1.38(2)   | C(7)-C(8)-H(8)       | 122.4     |
| C(8)-H(8)         | 0.9300    | C(9)-C(8)-H(8)       | 122.4     |
| C(9)-C(10)        | 1.34(2)   | C(10)-C(9)-C(8)      | 122.7(14) |
| C(9)-H(9)         | 0.9300    | C(10)-C(9)-H(9)      | 118.6     |
| C(10)-H(10)       | 0.9300    | C(8)-C(9)-H(9)       | 118.6     |
| C(11)-C(12)       | 1.48(2)   | C(9)-C(10)-N(3)      | 122.8(14) |
| C(11)-H(11A)      | 0.9700    | C(9)-C(10)-H(10)     | 118.6     |
| C(11)-H(11B)      | 0.9700    | N(3)-C(10)-H(10)     | 118.6     |
| C(12)-C(13)       | 1.404(9)  | C(12)-C(11)-N(1)     | 111.6(12) |
| C(12)-H(12)       | 0.9300    | C(12)-C(11)-H(11A)   | 109.3     |
| C(13)-H(13A)      | 1.16(15)  | N(1)-C(11)-H(11A)    | 109.3     |
| C(13)-H(13B)      | 0.50(15)  | C(12)-C(11)-H(11B)   | 109.3     |
| C(14)-C(14)#1     | 1.37(3)   | N(1)-C(11)-H(11B)    | 109.3     |
| C(14)-H(14A)      | 0.9700    | H(11A)-C(11)-H(11B)  | 108.0     |
| C(14)-H(14B)      | 0.9700    | C(13)-C(12)-C(11)    | 140.5(19) |
| C(4)-Se(1)-C(14)  | 99.9(6)   | C(13)-C(12)-H(12)    | 109.8     |
| N(2)-Cu(1)-N(3)   | 92.7(4)   | C(11)-C(12)-H(12)    | 109.8     |
| N(2)-Cu(1)-Cl(1)  | 144.7(3)  | C(12)-C(13)-H(13A)   | 90(7)     |
| N(3)-Cu(1)-Cl(1)  | 98.6(3)   | C(12)-C(13)-H(13B)   | 125(10)   |
| N(2)-Cu(1)-Cl(2)  | 95.0(3)   | H(13A)-C(13)-H(13B)  | 109(10)   |
| N(3)-Cu(1)-Cl(2)  | 139.5(3)  | C(14)#1-C(14)-Se(1)  | 117.1(10) |
| Cl(1)-Cu(1)-Cl(2) | 97.68(16) | C(14)#1-C(14)-H(14A) | 108.0     |
| C(2)-N(1)-C(4)    | 110.4(10) | Se(1)-C(14)-H(14A)   | 108.0     |
| C(2)-N(1)-C(11)   | 123.9(9)  | C(14)#1-C(14)-H(14B) | 108.0     |
| C(4)-N(1)-C(11)   | 125.7(11) | Se(1)-C(14)-H(14B)   | 108.0     |
| C(4)-N(2)-C(3)    | 109.4(10) | H(14A)-C(14)-H(14B)  | 107.3     |
| C(4)-N(2)-Cu(1)   | 130.2(8)  |                      |           |
| C(3)-N(2)-Cu(1)   | 116.5(7)  |                      |           |
| C(10)-N(3)-C(6)   | 116.9(12) |                      |           |

Symmetry transformations used to generate equivalent atoms:

#1 -x,y,-z+3/2



Table 8S. Torsion angles [°] for **5d**.

|                        |            |
|------------------------|------------|
| C(4)-N(1)-C(2)-O(1)    | -179.8(13) |
| C(11)-N(1)-C(2)-O(1)   | -1(2)      |
| C(4)-N(1)-C(2)-C(3)    | 2.0(14)    |
| C(11)-N(1)-C(2)-C(3)   | -179.1(11) |
| C(4)-N(2)-C(3)-C(5)    | 178.3(14)  |
| Cu(1)-N(2)-C(3)-C(5)   | -21.8(18)  |
| C(4)-N(2)-C(3)-C(2)    | 1.1(13)    |
| Cu(1)-N(2)-C(3)-C(2)   | 161.0(8)   |
| O(1)-C(2)-C(3)-C(5)    | 3(2)       |
| N(1)-C(2)-C(3)-C(5)    | -179.3(13) |
| O(1)-C(2)-C(3)-N(2)    | -180.0(14) |
| N(1)-C(2)-C(3)-N(2)    | -1.9(13)   |
| C(3)-N(2)-C(4)-N(1)    | 0.1(14)    |
| Cu(1)-N(2)-C(4)-N(1)   | -156.2(8)  |
| C(3)-N(2)-C(4)-Se(1)   | -177.4(9)  |
| Cu(1)-N(2)-C(4)-Se(1)  | 26.3(17)   |
| C(2)-N(1)-C(4)-N(2)    | -1.4(14)   |
| C(11)-N(1)-C(4)-N(2)   | 179.7(10)  |
| C(2)-N(1)-C(4)-Se(1)   | 176.4(9)   |
| C(11)-N(1)-C(4)-Se(1)  | -2.5(16)   |
| C(14)-Se(1)-C(4)-N(2)  | 19.8(12)   |
| C(14)-Se(1)-C(4)-N(1)  | -157.5(9)  |
| N(2)-C(3)-C(5)-C(6)    | 0(2)       |
| C(2)-C(3)-C(5)-C(6)    | 177.0(12)  |
| C(10)-N(3)-C(6)-C(7)   | 1.5(17)    |
| Cu(1)-N(3)-C(6)-C(7)   | -166.8(9)  |
| C(10)-N(3)-C(6)-C(5)   | -174.2(12) |
| Cu(1)-N(3)-C(6)-C(5)   | 17.5(15)   |
| C(3)-C(5)-C(6)-N(3)    | 3(2)       |
| C(3)-C(5)-C(6)-C(7)    | -173.3(13) |
| N(3)-C(6)-C(7)-C(8)    | -2.2(19)   |
| C(5)-C(6)-C(7)-C(8)    | 173.7(12)  |
| C(6)-C(7)-C(8)-C(9)    | 2(2)       |
| C(7)-C(8)-C(9)-C(10)   | -1(2)      |
| C(8)-C(9)-C(10)-N(3)   | 0(2)       |
| C(6)-N(3)-C(10)-C(9)   | -1(2)      |
| Cu(1)-N(3)-C(10)-C(9)  | 168.2(12)  |
| C(2)-N(1)-C(11)-C(12)  | 86.6(16)   |
| C(4)-N(1)-C(11)-C(12)  | -94.6(15)  |
| N(1)-C(11)-C(12)-C(13) | 20(3)      |

---

Symmetry transformations used to generate equivalent atoms:

#1 -x,y,-z+3/2

Table 9S. Hydrogen bonds for **5d** [Å and °].

| D-H...A                | d(D-H) | d(H...A) | d(D...A)  | <(DHA) |
|------------------------|--------|----------|-----------|--------|
| C(5)-H(5)...O(1)#2     | 0.93   | 2.41     | 3.298(15) | 159.4  |
| C(10)-H(10)...Cl(1)    | 0.93   | 2.59     | 3.223(17) | 125.5  |
| C(11)-H(11A)...Se(1)#3 | 0.97   | 3.03     | 3.757(13) | 133.3  |
| C(12)-H(12)...O(3)#4   | 0.93   | 2.31     | 3.17(3)   | 154.0  |
| C(14)-H(14A)...Se(1)#5 | 0.97   | 3.14     | 3.895(11) | 136.3  |
| C(14)-H(14B)...Cl(1)   | 0.97   | 2.75     | 3.635(13) | 151.7  |
| C(14)-H(14B)...N(2)    | 0.97   | 2.68     | 3.195(16) | 113.6  |

---

Symmetry transformations used to generate equivalent atoms:

#1  $-x, y, -z+3/2$  #2  $-x+1/2, -y+1/2, -z+1$  #3  $x, -y, z-1/2$

#4  $-x+1, -y, -z+1$  #5  $x, -y, z+1/2$

Table 10S. Crystal data and structure refinement for **5e** (CCDC 2017198).

| Parameter                         | <b>5e</b> (CCDC 2017198)                                                                                      |                                                                         |
|-----------------------------------|---------------------------------------------------------------------------------------------------------------|-------------------------------------------------------------------------|
| Empirical formula                 | C <sub>26</sub> H <sub>24</sub> Cl <sub>4</sub> Cu <sub>2</sub> N <sub>6</sub> O <sub>3</sub> Se <sub>2</sub> |                                                                         |
| Formula weight                    | 895.31                                                                                                        |                                                                         |
| Temperature                       | 293(2) K                                                                                                      |                                                                         |
| Wavelength                        | 1.54186 Å                                                                                                     |                                                                         |
| Crystal system                    | Monoclinic                                                                                                    |                                                                         |
| Space group                       | P 21/n                                                                                                        |                                                                         |
| Unit cell dimensions              | $a = 10.0633(3)$ Å<br>$b = 28.0640(10)$ Å<br>$c = 11.2909(3)$ Å                                               | $\alpha = 90^\circ$<br>$\beta = 93.491(2)^\circ$<br>$\gamma = 90^\circ$ |
| Volume                            | 3182.82(17) Å <sup>3</sup>                                                                                    |                                                                         |
| Z                                 | 4                                                                                                             |                                                                         |
| Density (calculated)              | 1.868 Mg/m <sup>3</sup>                                                                                       |                                                                         |
| Absorption coefficient            | 7.692 mm <sup>-1</sup>                                                                                        |                                                                         |
| $F(000)$                          | 1760                                                                                                          |                                                                         |
| Theta range for data collection.  | 4.227 to 66.950°                                                                                              |                                                                         |
| Index ranges                      | -11 ≤ h ≤ 7<br>-33 ≤ k ≤ 33<br>-13 ≤ l ≤ 12                                                                   |                                                                         |
| Reflections collected             | 32166                                                                                                         |                                                                         |
| Independent reflections           | 5468 [R <sub>(int)</sub> = 0.1833]                                                                            |                                                                         |
| Completeness to theta = 66.638°   | 96.5 %                                                                                                        |                                                                         |
| Refinement method                 | Full-matrix least-squares on F <sup>2</sup>                                                                   |                                                                         |
| Data / restraints / parameters    | 5468 / 3 / 394                                                                                                |                                                                         |
| Goodness-of-fit on F <sup>2</sup> | 0.774                                                                                                         |                                                                         |
| Final R indices [I > 2σ(I)]       | R <sub>1</sub> = 0.0571, wR <sub>2</sub> = 0.1125                                                             |                                                                         |
| R indices (all data)              | R <sub>1</sub> = 0.1419, wR <sub>2</sub> = 0.1345                                                             |                                                                         |
| Extinction coefficient            | n/a                                                                                                           |                                                                         |
| Largest diff. peak and hole       | 0.841 and -1.266 e.Å <sup>-3</sup>                                                                            |                                                                         |

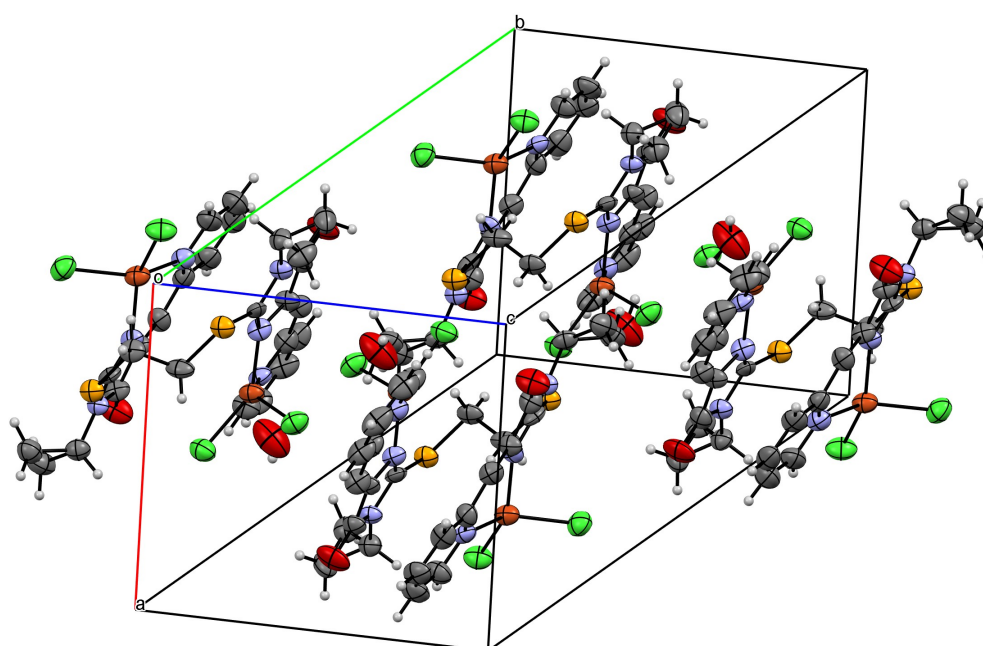

Table 11S. Bond lengths [ $\text{\AA}$ ] and angles [ $^\circ$ ] for **5e**.

|               |           |                      |           |
|---------------|-----------|----------------------|-----------|
| Cu(1A)-N(2A)  | 1.966(7)  | C(2B)-C(3B)          | 1.347(14) |
| Cu(1A)-N(1A)  | 2.040(7)  | C(2B)-H(2B)          | 0.9300    |
| Cu(1A)-Cl(1A) | 2.214(3)  | C(3B)-C(4B)          | 1.377(17) |
| Cu(1A)-Cl(2A) | 2.220(2)  | C(3B)-H(3B)          | 0.9300    |
| Se(1A)-C(10A) | 1.871(9)  | C(4B)-C(5B)          | 1.361(15) |
| Se(1A)-C(14A) | 1.968(9)  | C(4B)-H(4B)          | 0.9300    |
| O(1A)-C(9A)   | 1.211(10) | C(5B)-C(6B)          | 1.385(12) |
| N(1A)-C(6A)   | 1.366(11) | C(5B)-H(5B)          | 0.9300    |
| N(1A)-C(2A)   | 1.367(11) | C(6B)-C(7B)          | 1.449(13) |
| N(2A)-C(10A)  | 1.334(11) | C(7B)-C(8B)          | 1.333(11) |
| N(2A)-C(8A)   | 1.400(10) | C(8B)-C(9B)          | 1.496(13) |
| N(3A)-C(9A)   | 1.379(10) | C(11B)-C(12B)        | 1.483(13) |
| N(3A)-C(10A)  | 1.400(11) | C(11B)-C(13B)        | 1.490(14) |
| N(3A)-C(11A)  | 1.431(11) | C(11B)-H(11B)        | 0.9800    |
| C(2A)-C(3A)   | 1.351(13) | C(12B)-C(13B)        | 1.456(15) |
| C(2A)-H(2A)   | 0.9300    | C(12B)-H(12C)        | 0.9700    |
| C(3A)-C(4A)   | 1.357(15) | C(12B)-H(12D)        | 0.9700    |
| C(3A)-H(3A)   | 0.9300    | C(13B)-H(13C)        | 0.9700    |
| C(4A)-C(5A)   | 1.347(14) | C(13B)-H(13D)        | 0.9700    |
| C(4A)-H(4A)   | 0.9300    | C(14B)-H(14C)        | 0.9700    |
| C(5A)-C(6A)   | 1.408(12) | C(14B)-H(14D)        | 0.9700    |
| C(5A)-H(5A)   | 0.9300    | O(2)-H(22)           | 0.901(10) |
| C(6A)-C(7A)   | 1.447(13) | O(2)-H(23)           | 0.901(11) |
| C(7A)-C(8A)   | 1.326(11) | N(2A)-Cu(1A)-N(1A)   | 92.4(3)   |
| C(8A)-C(9A)   | 1.480(13) | N(2A)-Cu(1A)-Cl(1A)  | 95.4(2)   |
| C(11A)-C(13A) | 1.492(14) | N(1A)-Cu(1A)-Cl(1A)  | 135.5(2)  |
| C(11A)-C(12A) | 1.499(13) | N(2A)-Cu(1A)-Cl(2A)  | 145.1(2)  |
| C(11A)-H(11A) | 0.9800    | N(1A)-Cu(1A)-Cl(2A)  | 98.9(2)   |
| C(12A)-C(13A) | 1.461(15) | Cl(1A)-Cu(1A)-Cl(2A) | 99.16(11) |
| C(12A)-H(12A) | 0.9700    | C(10A)-Se(1A)-C(14A) | 97.9(4)   |
| C(12A)-H(12B) | 0.9700    | C(6A)-N(1A)-C(2A)    | 116.2(7)  |
| C(13A)-H(13A) | 0.9700    | C(6A)-N(1A)-Cu(1A)   | 123.0(6)  |
| C(13A)-H(13B) | 0.9700    | C(2A)-N(1A)-Cu(1A)   | 119.7(6)  |
| C(14A)-C(14B) | 1.509(13) | C(10A)-N(2A)-C(8A)   | 105.1(7)  |
| C(14A)-H(14A) | 0.9700    | C(10A)-N(2A)-Cu(1A)  | 131.3(6)  |
| C(14A)-H(14B) | 0.9700    | C(8A)-N(2A)-Cu(1A)   | 119.4(5)  |
| Cu(1B)-N(2B)  | 1.972(7)  | C(9A)-N(3A)-C(10A)   | 107.9(7)  |
| Cu(1B)-N(1B)  | 2.045(7)  | C(9A)-N(3A)-C(11A)   | 126.1(7)  |
| Cu(1B)-Cl(2B) | 2.203(2)  | C(10A)-N(3A)-C(11A)  | 125.5(7)  |
| Cu(1B)-Cl(1B) | 2.231(3)  | C(3A)-C(2A)-N(1A)    | 123.5(9)  |
| Se(1B)-C(10B) | 1.873(8)  | C(3A)-C(2A)-H(2A)    | 118.3     |
| Se(1B)-C(14B) | 1.962(9)  | N(1A)-C(2A)-H(2A)    | 118.3     |
| O(1B)-C(9B)   | 1.203(10) | C(2A)-C(3A)-C(4A)    | 120.4(10) |
| N(1B)-C(6B)   | 1.365(12) | C(2A)-C(3A)-H(3A)    | 119.8     |
| N(1B)-C(2B)   | 1.373(12) | C(4A)-C(3A)-H(3A)    | 119.8     |
| N(2B)-C(10B)  | 1.322(11) | C(5A)-C(4A)-C(3A)    | 118.5(9)  |
| N(2B)-C(8B)   | 1.394(10) | C(5A)-C(4A)-H(4A)    | 120.8     |
| N(3B)-C(9B)   | 1.361(10) | C(3A)-C(4A)-H(4A)    | 120.8     |
| N(3B)-C(10B)  | 1.386(10) | C(4A)-C(5A)-C(6A)    | 121.0(9)  |
| N(3B)-C(11B)  | 1.451(11) | C(4A)-C(5A)-H(5A)    | 119.5     |

|                      |           |
|----------------------|-----------|
| C(6A)-C(5A)-H(5A)    | 119.5     |
| N(1A)-C(6A)-C(5A)    | 120.4(8)  |
| N(1A)-C(6A)-C(7A)    | 119.6(8)  |
| C(5A)-C(6A)-C(7A)    | 120.0(8)  |
| C(8A)-C(7A)-C(6A)    | 129.7(8)  |
| C(7A)-C(8A)-N(2A)    | 126.2(8)  |
| C(7A)-C(8A)-C(9A)    | 124.2(8)  |
| N(2A)-C(8A)-C(9A)    | 109.6(7)  |
| O(1A)-C(9A)-N(3A)    | 126.9(9)  |
| O(1A)-C(9A)-C(8A)    | 128.9(8)  |
| N(3A)-C(9A)-C(8A)    | 104.0(7)  |
| N(2A)-C(10A)-N(3A)   | 113.4(7)  |
| N(2A)-C(10A)-Se(1A)  | 130.4(6)  |
| N(3A)-C(10A)-Se(1A)  | 116.2(6)  |
| N(3A)-C(11A)-C(13A)  | 119.3(9)  |
| N(3A)-C(11A)-C(12A)  | 117.5(8)  |
| C(13A)-C(11A)-C(12A) | 58.4(7)   |
| N(3A)-C(11A)-H(11A)  | 116.4     |
| C(13A)-C(11A)-H(11A) | 116.4     |
| C(12A)-C(11A)-H(11A) | 116.4     |
| C(13A)-C(12A)-C(11A) | 60.5(7)   |
| C(13A)-C(12A)-H(12A) | 117.7     |
| C(11A)-C(12A)-H(12A) | 117.7     |
| C(13A)-C(12A)-H(12B) | 117.7     |
| C(11A)-C(12A)-H(12B) | 117.7     |
| H(12A)-C(12A)-H(12B) | 114.8     |
| C(12A)-C(13A)-C(11A) | 61.0(7)   |
| C(12A)-C(13A)-H(13A) | 117.7     |
| C(11A)-C(13A)-H(13A) | 117.7     |
| C(12A)-C(13A)-H(13B) | 117.7     |
| C(11A)-C(13A)-H(13B) | 117.7     |
| H(13A)-C(13A)-H(13B) | 114.8     |
| C(14B)-C(14A)-Se(1A) | 111.0(6)  |
| C(14B)-C(14A)-H(14A) | 109.4     |
| Se(1A)-C(14A)-H(14A) | 109.4     |
| C(14B)-C(14A)-H(14B) | 109.4     |
| Se(1A)-C(14A)-H(14B) | 109.4     |
| H(14A)-C(14A)-H(14B) |           |
| N(2B)-Cu(1B)-N(1B)   | 92.7(3)   |
| N(2B)-Cu(1B)-Cl(2B)  | 147.6(2)  |
| N(1B)-Cu(1B)-Cl(2B)  | 98.5(2)   |
| N(2B)-Cu(1B)-Cl(1B)  | 93.9(2)   |
| N(1B)-Cu(1B)-Cl(1B)  | 137.1(2)  |
| Cl(2B)-Cu(1B)-Cl(1B) | 98.12(11) |
| C(10B)-Se(1B)-C(14B) | 99.9(4)   |
| C(6B)-N(1B)-C(2B)    | 116.4(8)  |
| C(6B)-N(1B)-Cu(1B)   | 123.2(6)  |
| C(2B)-N(1B)-Cu(1B)   | 119.1(7)  |
| C(10B)-N(2B)-C(8B)   | 107.0(7)  |
| C(10B)-N(2B)-Cu(1B)  | 131.9(6)  |
| C(8B)-N(2B)-Cu(1B)   | 117.2(5)  |
| C(9B)-N(3B)-C(10B)   | 108.7(6)  |

|                      |           |
|----------------------|-----------|
| C(9B)-N(3B)-C(11B)   | 125.5(6)  |
| C(10B)-N(3B)-C(11B)  | 124.6(7)  |
| C(3B)-C(2B)-N(1B)    | 122.6(11) |
| C(3B)-C(2B)-H(2B)    | 118.7     |
| N(1B)-C(2B)-H(2B)    | 118.7     |
| C(2B)-C(3B)-C(4B)    | 120.8(10) |
| C(2B)-C(3B)-H(3B)    | 119.6     |
| C(4B)-C(3B)-H(3B)    | 119.6     |
| C(5B)-C(4B)-C(3B)    | 117.8(10) |
| C(5B)-C(4B)-H(4B)    | 121.1     |
| C(3B)-C(4B)-H(4B)    | 121.1     |
| C(4B)-C(5B)-C(6B)    | 120.5(10) |
| C(4B)-C(5B)-H(5B)    | 119.7     |
| C(6B)-C(5B)-H(5B)    | 119.7     |
| N(1B)-C(6B)-C(5B)    | 121.7(9)  |
| N(1B)-C(6B)-C(7B)    | 119.7(8)  |
| C(5B)-C(6B)-C(7B)    | 118.6(9)  |
| C(8B)-C(7B)-C(6B)    | 127.4(8)  |
| C(7B)-C(8B)-N(2B)    | 129.8(8)  |
| C(7B)-C(8B)-C(9B)    | 122.9(8)  |
| N(2B)-C(8B)-C(9B)    | 107.3(7)  |
| O(1B)-C(9B)-N(3B)    | 127.3(8)  |
| O(1B)-C(9B)-C(8B)    | 128.3(8)  |
| N(3B)-C(9B)-C(8B)    | 104.4(6)  |
| N(2B)-C(10B)-N(3B)   | 112.3(7)  |
| N(2B)-C(10B)-Se(1B)  | 131.0(6)  |
| N(3B)-C(10B)-Se(1B)  | 116.7(6)  |
| N(3B)-C(11B)-C(12B)  | 116.4(8)  |
| N(3B)-C(11B)-C(13B)  | 117.7(9)  |
| C(12B)-C(11B)-C(13B) | 58.7(7)   |
| N(3B)-C(11B)-H(11B)  | 117.1     |
| C(12B)-C(11B)-H(11B) | 117.1     |
| C(13B)-C(11B)-H(11B) | 117.1     |
| C(13B)-C(12B)-C(11B) | 60.9(7)   |
| C(13B)-C(12B)-H(12C) | 117.7     |
| C(11B)-C(12B)-H(12C) | 117.7     |
| C(13B)-C(12B)-H(12D) | 117.7     |
| C(11B)-C(12B)-H(12D) | 117.7     |
| H(12C)-C(12B)-H(12D) | 114.8     |
| C(12B)-C(13B)-C(11B) | 60.4(7)   |
| C(12B)-C(13B)-H(13C) | 117.7     |
| C(11B)-C(13B)-H(13C) | 117.7     |
| C(12B)-C(13B)-H(13D) | 117.7     |
| C(11B)-C(13B)-H(13D) | 117.7     |
| H(13C)-C(13B)-H(13D) | 114.8     |
| C(14A)-C(14B)-Se(1B) | 109.2(5)  |
| C(14A)-C(14B)-H(14C) | 109.8     |
| Se(1B)-C(14B)-H(14C) | 109.8     |
| C(14A)-C(14B)-H(14D) | 109.8     |
| Se(1B)-C(14B)-H(14D) | 109.8     |
| H(14C)-C(14B)-H(14D) | 108.3     |
| H(22)-O(2)-H(23)     | 103.6(16) |

Table 12S. Torsion angles [°] for **5e**.

|                            |            |
|----------------------------|------------|
| C(6A)-N(1A)-C(2A)-C(3A)    | 0.4(15)    |
| Cu(1A)-N(1A)-C(2A)-C(3A)   | 169.4(9)   |
| N(1A)-C(2A)-C(3A)-C(4A)    | -0.9(18)   |
| C(2A)-C(3A)-C(4A)-C(5A)    | -0.5(18)   |
| C(3A)-C(4A)-C(5A)-C(6A)    | 2.3(18)    |
| C(2A)-N(1A)-C(6A)-C(5A)    | 1.4(14)    |
| Cu(1A)-N(1A)-C(6A)-C(5A)   | -167.2(7)  |
| C(2A)-N(1A)-C(6A)-C(7A)    | -176.2(10) |
| Cu(1A)-N(1A)-C(6A)-C(7A)   | 15.2(13)   |
| C(4A)-C(5A)-C(6A)-N(1A)    | -2.8(16)   |
| C(4A)-C(5A)-C(6A)-C(7A)    | 174.8(11)  |
| N(1A)-C(6A)-C(7A)-C(8A)    | 8.1(17)    |
| C(5A)-C(6A)-C(7A)-C(8A)    | -169.5(11) |
| C(6A)-C(7A)-C(8A)-N(2A)    | -5.4(18)   |
| C(6A)-C(7A)-C(8A)-C(9A)    | 174.4(11)  |
| C(10A)-N(2A)-C(8A)-C(7A)   | -179.6(10) |
| Cu(1A)-N(2A)-C(8A)-C(7A)   | -20.3(13)  |
| C(10A)-N(2A)-C(8A)-C(9A)   | 0.6(11)    |
| Cu(1A)-N(2A)-C(8A)-C(9A)   | 159.9(7)   |
| C(10A)-N(3A)-C(9A)-O(1A)   | -175.4(11) |
| C(11A)-N(3A)-C(9A)-O(1A)   | -3.3(17)   |
| C(10A)-N(3A)-C(9A)-C(8A)   | 1.3(10)    |
| C(11A)-N(3A)-C(9A)-C(8A)   | 173.4(9)   |
| C(7A)-C(8A)-C(9A)-O(1A)    | -4.4(19)   |
| N(2A)-C(8A)-C(9A)-O(1A)    | 175.4(11)  |
| C(7A)-C(8A)-C(9A)-N(3A)    | 179.0(9)   |
| N(2A)-C(8A)-C(9A)-N(3A)    | -1.2(11)   |
| C(8A)-N(2A)-C(10A)-N(3A)   | 0.3(11)    |
| Cu(1A)-N(2A)-C(10A)-N(3A)  | -155.5(6)  |
| C(8A)-N(2A)-C(10A)-Se(1A)  | -176.3(7)  |
| Cu(1A)-N(2A)-C(10A)-Se(1A) | 27.9(14)   |
| C(9A)-N(3A)-C(10A)-N(2A)   | -1.1(11)   |
| C(11A)-N(3A)-C(10A)-N(2A)  | -173.2(9)  |
| C(9A)-N(3A)-C(10A)-Se(1A)  | 176.1(6)   |
| C(11A)-N(3A)-C(10A)-Se(1A) | 3.9(12)    |
| C(14A)-Se(1A)-C(10A)-N(2A) | 16.9(10)   |
| C(14A)-Se(1A)-C(10A)-N(3A) | -159.7(7)  |
| C(9A)-N(3A)-C(11A)-C(13A)  | 118.9(10)  |
| C(10A)-N(3A)-C(11A)-C(13A) | -70.4(13)  |
| C(9A)-N(3A)-C(11A)-C(12A)  | 51.5(13)   |
| C(10A)-N(3A)-C(11A)-C(12A) | -137.8(10) |
| N(3A)-C(11A)-C(12A)-C(13A) | 109.1(10)  |
| N(3A)-C(11A)-C(13A)-C(12A) | -106.1(10) |
| C(6B)-N(1B)-C(2B)-C(3B)    | 1.9(15)    |

|                             |            |
|-----------------------------|------------|
| Cu(1B)-N(1B)-C(2B)-C(3B)    | 169.4(8)   |
| N(1B)-C(2B)-C(3B)-C(4B)     | -4.4(17)   |
| C(2B)-C(3B)-C(4B)-C(5B)     | 3.2(18)    |
| C(3B)-C(4B)-C(5B)-C(6B)     | 0.3(17)    |
| C(2B)-N(1B)-C(6B)-C(5B)     | 1.7(14)    |
| Cu(1B)-N(1B)-C(6B)-C(5B)    | -165.2(7)  |
| C(2B)-N(1B)-C(6B)-C(7B)     | -176.1(10) |
| Cu(1B)-N(1B)-C(6B)-C(7B)    | 17.0(13)   |
| C(4B)-C(5B)-C(6B)-N(1B)     | -2.8(16)   |
| C(4B)-C(5B)-C(6B)-C(7B)     | 175.1(11)  |
| N(1B)-C(6B)-C(7B)-C(8B)     | 6.5(17)    |
| C(5B)-C(6B)-C(7B)-C(8B)     | -171.4(11) |
| C(6B)-C(7B)-C(8B)-N(2B)     | -4.9(19)   |
| C(6B)-C(7B)-C(8B)-C(9B)     | 175.8(10)  |
| C(10B)-N(2B)-C(8B)-C(7B)    | 179.8(10)  |
| Cu(1B)-N(2B)-C(8B)-C(7B)    | -19.8(14)  |
| C(10B)-N(2B)-C(8B)-C(9B)    | -0.8(11)   |
| Cu(1B)-N(2B)-C(8B)-C(9B)    | 159.5(6)   |
| C(10B)-N(3B)-C(9B)-O(1B)    | -175.6(11) |
| C(11B)-N(3B)-C(9B)-O(1B)    | -7.9(16)   |
| C(10B)-N(3B)-C(9B)-C(8B)    | 4.4(10)    |
| C(11B)-N(3B)-C(9B)-C(8B)    | 172.1(9)   |
| C(7B)-C(8B)-C(9B)-O(1B)     | -2.9(18)   |
| N(2B)-C(8B)-C(9B)-O(1B)     | 177.7(11)  |
| C(7B)-C(8B)-C(9B)-N(3B)     | 177.2(9)   |
| N(2B)-C(8B)-C(9B)-N(3B)     | -2.3(10)   |
| C(8B)-N(2B)-C(10B)-N(3B)    | 3.7(11)    |
| Cu(1B)-N(2B)-C(10B)-N(3B)   | -152.6(7)  |
| C(8B)-N(2B)-C(10B)-Se(1B)   | -176.4(7)  |
| Cu(1B)-N(2B)-C(10B)-Se(1B)  | 27.3(14)   |
| C(9B)-N(3B)-C(10B)-N(2B)    | -5.4(11)   |
| C(11B)-N(3B)-C(10B)-N(2B)   | -173.2(9)  |
| C(9B)-N(3B)-C(10B)-Se(1B)   | 174.7(6)   |
| C(11B)-N(3B)-C(10B)-Se(1B)  | 6.9(12)    |
| C(14B)-Se(1B)-C(10B)-N(2B)  | 18.0(10)   |
| C(14B)-Se(1B)-C(10B)-N(3B)  | -162.1(7)  |
| C(9B)-N(3B)-C(11B)-C(12B)   | 55.1(13)   |
| C(10B)-N(3B)-C(11B)-C(12B)  | -139.1(9)  |
| C(9B)-N(3B)-C(11B)-C(13B)   | 121.8(9)   |
| C(10B)-N(3B)-C(11B)-C(13B)  | -72.3(12)  |
| N(3B)-C(11B)-C(12B)-C(13B)  | 107.8(10)  |
| N(3B)-C(11B)-C(13B)-C(12B)  | -105.6(9)  |
| Se(1A)-C(14A)-C(14B)-Se(1B) | -175.7(4)  |

Table 13S. Hydrogen bonds for **5e** [ $\text{\AA}$  and  $^\circ$ ].

| D-H...A                  | d(D-H)    | d(H...A) | d(D...A)  | <(DHA)  |
|--------------------------|-----------|----------|-----------|---------|
| C(2A)-H(2A)...Cl(2A)     | 0.93      | 2.62     | 3.249(10) | 125.7   |
| C(5A)-H(5A)...O(1B)#1    | 0.93      | 2.66     | 3.467(13) | 146.0   |
| C(11A)-H(11A)...Cl(2A)#2 | 0.98      | 2.98     | 3.823(10) | 145.3   |
| C(12A)-H(12A)...Cl(1A)#2 | 0.97      | 2.87     | 3.830(12) | 172.3   |
| C(13A)-H(13B)...Se(1B)#3 | 0.97      | 3.12     | 3.912(11) | 139.9   |
| C(14A)-H(14A)...Se(1B)#4 | 0.97      | 3.06     | 3.985(10) | 158.9   |
| C(14A)-H(14B)...Cl(2A)   | 0.97      | 2.88     | 3.609(9)  | 132.3   |
| C(14A)-H(14B)...N(2A)    | 0.97      | 2.58     | 3.174(12) | 119.3   |
| C(2B)-H(2B)...Cl(2B)     | 0.93      | 2.58     | 3.213(12) | 125.6   |
| C(5B)-H(5B)...O(1A)#5    | 0.93      | 2.64     | 3.464(13) | 147.5   |
| C(11B)-H(11B)...Cl(2B)#6 | 0.98      | 2.88     | 3.706(11) | 142.4   |
| C(12B)-H(12C)...Cl(1B)#6 | 0.97      | 2.98     | 3.941(11) | 172.0   |
| C(14B)-H(14C)...Cl(2B)#3 | 0.97      | 2.76     | 3.624(9)  | 148.2   |
| C(14B)-H(14D)...Cl(2B)   | 0.97      | 2.84     | 3.760(10) | 157.7   |
| O(2)-H(22)...Cl(1B)#7    | 0.901(10) | 2.39(4)  | 3.263(10) | 163(13) |
| O(2)-H(23)...Cl(1A)      | 0.901(11) | 2.50(10) | 3.250(10) | 140(13) |

---

Symmetry transformations used to generate equivalent atoms:

#1  $x-1/2, -y+1/2, z+1/2$  #2  $x-1, y, z$  #3  $-x+1, -y+1, -z+1$  #4  $-x+2, -y+1, -z+1$  #5  $x+1/2, -y+1/2, z-1/2$  #6  $x+1, y, z$  #7  $x, y, z+1$

Table 14S. Crystal data and structure refinement for **5i** (CCDC 2125344).

| Parameter                                           | <b>5i</b> (CCDC 2125344)                                                                                      |                                                                          |
|-----------------------------------------------------|---------------------------------------------------------------------------------------------------------------|--------------------------------------------------------------------------|
| Empirical formula                                   | C <sub>30</sub> H <sub>32</sub> Cl <sub>4</sub> Cu <sub>2</sub> N <sub>6</sub> O <sub>2</sub> Se <sub>2</sub> |                                                                          |
| Formula weight                                      | 935.41                                                                                                        |                                                                          |
| Temperature                                         | 296(2) K                                                                                                      |                                                                          |
| Wavelength                                          | 1.54186 Å                                                                                                     |                                                                          |
| Crystal system                                      | Monoclinic                                                                                                    |                                                                          |
| Space group                                         | C 2/c                                                                                                         |                                                                          |
| Unit cell dimensions                                | $a = 27.8120(10)$ Å<br>$b = 10.3367(4)$ Å<br>$c = 13.4574(6)$ Å                                               | $\alpha = 90^\circ$<br>$\beta = 118.406(3)^\circ$<br>$\gamma = 90^\circ$ |
| Volume                                              | 3403.0(3) Å <sup>3</sup>                                                                                      |                                                                          |
| <i>Z</i>                                            | 4                                                                                                             |                                                                          |
| Density (calculated)                                | 1.826 Mg/m <sup>3</sup>                                                                                       |                                                                          |
| Absorption coefficient                              | 7.201 mm <sup>-1</sup>                                                                                        |                                                                          |
| <i>F</i> (000)                                      | 1856                                                                                                          |                                                                          |
| Theta range for data collection.                    | 3.614 to 66.990°                                                                                              |                                                                          |
| Index ranges                                        | -33 ≤ <i>h</i> ≤ 33<br>-8 ≤ <i>k</i> ≤ 12<br>-15 ≤ <i>l</i> ≤ 15                                              |                                                                          |
| Reflections collected                               | 16893                                                                                                         |                                                                          |
| Independent reflections                             | 2989 [ <i>R</i> <sub>(int)</sub> = 0.1318]                                                                    |                                                                          |
| Completeness to theta = 66.638°                     | 98.6 %                                                                                                        |                                                                          |
| Refinement method                                   | Full-matrix least-squares on <i>F</i> <sup>2</sup>                                                            |                                                                          |
| Data / restraints / parameters                      | 2989 / 5 / 193                                                                                                |                                                                          |
| Goodness-of-fit on <i>F</i> <sup>2</sup>            | 0.920                                                                                                         |                                                                          |
| Final <i>R</i> indices [ <i>I</i> > 2σ( <i>I</i> )] | <i>R</i> <sub>1</sub> = 0.0855, <i>wR</i> <sub>2</sub> = 0.2388                                               |                                                                          |
| <i>R</i> indices (all data)                         | <i>R</i> <sub>1</sub> = 0.1520, <i>wR</i> <sub>2</sub> = 0.2776                                               |                                                                          |
| Extinction coefficient                              | n/a                                                                                                           |                                                                          |
| Largest diff. peak and hole                         | 1.506 and -1.529 e.Å <sup>-3</sup>                                                                            |                                                                          |

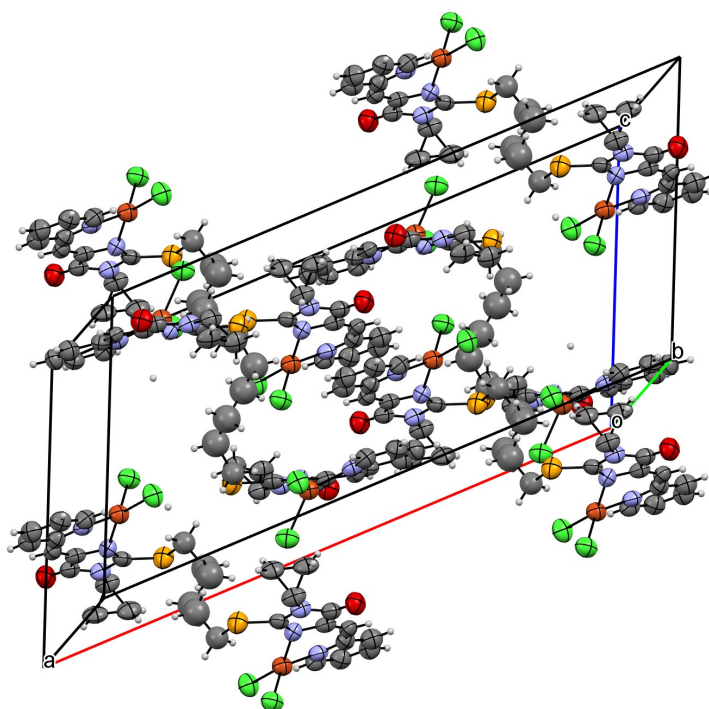



Table 15S. Bond lengths [ $\text{\AA}$ ] and angles [ $^\circ$ ] for **5i**.

|               |           |                   |           |                      |           |
|---------------|-----------|-------------------|-----------|----------------------|-----------|
| Cu(1)-N(2)    | 1.974(9)  | C(16)-H(16B)      | 0.9700    | N(3)-C(10)-Se(1)     | 116.5(8)  |
| Cu(1)-N(1)    | 2.072(10) | N(2)-Cu(1)-N(1)   | 91.4(4)   | N(3)-C(11)-C(12)     | 119.7(11) |
| Cu(1)-Cl(1)   | 2.232(3)  | N(2)-Cu(1)-Cl(1)  | 147.7(3)  | N(3)-C(11)-C(13)     | 121.4(10) |
| Cu(1)-Cl(2)   | 2.253(4)  | N(1)-Cu(1)-Cl(1)  | 98.4(3)   | C(12)-C(11)-C(13)    | 59.4(9)   |
| O(1)-C(9)     | 1.198(13) | N(2)-Cu(1)-Cl(2)  | 95.1(3)   | N(3)-C(11)-H(11)     | 115.0     |
| N(1)-C(6)     | 1.334(14) | N(1)-Cu(1)-Cl(2)  | 139.9(3)  | C(12)-C(11)-H(11)    | 115.0     |
| N(1)-C(2)     | 1.349(14) | Cl(1)-Cu(1)-Cl(2) | 96.83(13) | C(13)-C(11)-H(11)    | 115.0     |
| N(2)-C(10)    | 1.351(14) | C(6)-N(1)-C(2)    | 118.4(11) | C(13)-C(12)-C(11)    | 60.5(9)   |
| N(2)-C(8)     | 1.411(14) | C(6)-N(1)-Cu(1)   | 122.2(7)  | C(13)-C(12)-H(12A)   | 117.7     |
| N(3)-C(9)     | 1.407(15) | C(2)-N(1)-Cu(1)   | 118.8(8)  | C(11)-C(12)-H(12A)   | 117.7     |
| N(3)-C(10)    | 1.410(13) | C(10)-N(2)-C(8)   | 106.5(8)  | C(13)-C(12)-H(12B)   | 117.7     |
| N(3)-C(11)    | 1.415(13) | C(10)-N(2)-Cu(1)  | 131.2(8)  | C(11)-C(12)-H(12B)   | 117.7     |
| C(2)-C(3)     | 1.374(18) | C(8)-N(2)-Cu(1)   | 117.3(7)  | H(12A)-C(12)-H(12B)  | 114.8     |
| C(2)-H(2)     | 0.9300    | C(9)-N(3)-C(10)   | 109.3(9)  | C(12)-C(13)-C(11)    | 60.2(9)   |
| C(3)-C(4)     | 1.387(19) | C(9)-N(3)-C(11)   | 124.3(9)  | C(12)-C(13)-H(13A)   | 117.8     |
| C(3)-H(3)     | 0.9300    | C(10)-N(3)-C(11)  | 126.4(11) | C(11)-C(13)-H(13A)   | 117.8     |
| C(4)-C(5)     | 1.406(16) | N(1)-C(2)-C(3)    | 123.2(11) | C(12)-C(13)-H(13B)   | 117.8     |
| C(4)-H(4)     | 0.9300    | N(1)-C(2)-H(2)    | 118.4     | C(11)-C(13)-H(13B)   | 117.8     |
| C(5)-C(6)     | 1.392(17) | C(3)-C(2)-H(2)    | 118.4     | H(13A)-C(13)-H(13B)  | 114.9     |
| C(5)-H(5)     | 0.9300    | C(2)-C(3)-C(4)    | 119.5(11) | C(10)-Se(1)-C(14)    | 101.7(6)  |
| C(6)-C(7)     | 1.454(15) | C(2)-C(3)-H(3)    | 120.2     | C(15)-C(14)-Se(1)    | 107.0(10) |
| C(7)-C(8)     | 1.324(16) | C(4)-C(3)-H(3)    | 120.2     | C(15)-C(14)-H(14A)   | 110.3     |
| C(7)-H(7)     | 0.9300    | C(3)-C(4)-C(5)    | 117.0(12) | Se(1)-C(14)-H(14A)   | 110.3     |
| C(8)-C(9)     | 1.492(15) | C(3)-C(4)-H(4)    | 121.5     | C(15)-C(14)-H(14B)   | 110.3     |
| C(10)-Se(1)   | 1.827(12) | C(5)-C(4)-H(4)    | 121.5     | Se(1)-C(14)-H(14B)   | 110.3     |
| C(11)-C(12)   | 1.471(17) | C(6)-C(5)-C(4)    | 120.2(12) | H(14A)-C(14)-H(14B)  | 108.6     |
| C(11)-C(13)   | 1.476(18) | C(6)-C(5)-H(5)    | 119.9     | C(16)-C(15)-C(14)    | 121.5(11) |
| C(11)-H(11)   | 0.45(17)  | C(4)-C(5)-H(5)    | 119.9     | C(16)-C(15)-H(15A)   | 106.9     |
| C(12)-C(13)   | 1.459(19) | N(1)-C(6)-C(5)    | 121.3(10) | C(14)-C(15)-H(15A)   | 106.9     |
| C(12)-H(12A)  | 0.9700    | N(1)-C(6)-C(7)    | 121.0(10) | C(16)-C(15)-H(15B)   | 106.9     |
| C(12)-H(12B)  | 0.9700    | C(5)-C(6)-C(7)    | 117.7(11) | C(14)-C(15)-H(15B)   | 106.9     |
| C(13)-H(13A)  | 0.9700    | C(8)-C(7)-C(6)    | 128.2(11) | H(15A)-C(15)-H(15B)  | 106.7     |
| C(13)-H(13B)  | 0.9700    | C(8)-C(7)-H(7)    | 115.9     | C(15)-C(16)-C(16)#1  | 113.4(10) |
| Se(1)-C(14)   | 1.912(13) | C(6)-C(7)-H(7)    | 115.9     | C(15)-C(16)-H(16A)   | 108.9     |
| C(14)-C(15)   | 1.491(9)  | C(7)-C(8)-N(2)    | 127.0(10) | C(16)#1-C(16)-H(16A) | 108.9     |
| C(14)-H(14A)  | 0.9700    | C(7)-C(8)-C(9)    | 123.6(11) | C(15)-C(16)-H(16B)   | 108.9     |
| C(14)-H(14B)  | 0.9700    | N(2)-C(8)-C(9)    | 109.4(10) | C(16)#1-C(16)-H(16B) | 108.9     |
| C(15)-C(16)   | 1.486(9)  | O(1)-C(9)-N(3)    | 126.5(10) | H(16A)-C(16)-H(16B)  | 107.7     |
| C(15)-H(15A)  | 0.9700    | O(1)-C(9)-C(8)    | 130.5(12) |                      |           |
| C(15)-H(15B)  | 0.9700    | N(3)-C(9)-C(8)    | 103.1(9)  |                      |           |
| C(16)-C(16)#1 | 1.557(10) | N(2)-C(10)-N(3)   | 111.5(10) |                      |           |
| C(16)-H(16A)  | 0.9700    | N(2)-C(10)-Se(1)  | 131.9(8)  |                      |           |

Symmetry transformations used to generate equivalent atoms:

#1  $-x+3/2, -y+1/2, -z+2$

Table 16S. Torsion angles [°] for **5i**.

|                           |            |
|---------------------------|------------|
| C(6)-N(1)-C(2)-C(3)       | 4.7(18)    |
| Cu(1)-N(1)-C(2)-C(3)      | -167.1(10) |
| N(1)-C(2)-C(3)-C(4)       | 0.1(19)    |
| C(2)-C(3)-C(4)-C(5)       | -3.1(19)   |
| C(3)-C(4)-C(5)-C(6)       | 1.5(19)    |
| C(2)-N(1)-C(6)-C(5)       | -6.4(17)   |
| Cu(1)-N(1)-C(6)-C(5)      | 165.2(9)   |
| C(2)-N(1)-C(6)-C(7)       | 173.5(10)  |
| Cu(1)-N(1)-C(6)-C(7)      | -15.0(15)  |
| C(4)-C(5)-C(6)-N(1)       | 3.4(19)    |
| C(4)-C(5)-C(6)-C(7)       | -176.5(11) |
| N(1)-C(6)-C(7)-C(8)       | -9.3(18)   |
| C(5)-C(6)-C(7)-C(8)       | 170.6(12)  |
| C(6)-C(7)-C(8)-N(2)       | 2.8(19)    |
| C(6)-C(7)-C(8)-C(9)       | -177.8(10) |
| C(10)-N(2)-C(8)-C(7)      | -175.4(11) |
| Cu(1)-N(2)-C(8)-C(7)      | 26.8(14)   |
| C(10)-N(2)-C(8)-C(9)      | 5.0(12)    |
| Cu(1)-N(2)-C(8)-C(9)      | -152.7(7)  |
| C(10)-N(3)-C(9)-O(1)      | -177.4(11) |
| C(11)-N(3)-C(9)-O(1)      | 0.7(19)    |
| C(10)-N(3)-C(9)-C(8)      | 2.5(11)    |
| C(11)-N(3)-C(9)-C(8)      | -179.4(10) |
| C(7)-C(8)-C(9)-O(1)       | -4(2)      |
| N(2)-C(8)-C(9)-O(1)       | 175.3(12)  |
| C(7)-C(8)-C(9)-N(3)       | 175.8(10)  |
| N(2)-C(8)-C(9)-N(3)       | -4.6(11)   |
| C(8)-N(2)-C(10)-N(3)      | -3.5(12)   |
| Cu(1)-N(2)-C(10)-N(3)     | 150.0(7)   |
| C(8)-N(2)-C(10)-Se(1)     | -179.3(9)  |
| Cu(1)-N(2)-C(10)-Se(1)    | -25.9(15)  |
| C(9)-N(3)-C(10)-N(2)      | 0.5(12)    |
| C(11)-N(3)-C(10)-N(2)     | -177.6(10) |
| C(9)-N(3)-C(10)-Se(1)     | 177.0(7)   |
| C(11)-N(3)-C(10)-Se(1)    | -1.1(15)   |
| C(9)-N(3)-C(11)-C(12)     | 52.1(17)   |
| C(10)-N(3)-C(11)-C(12)    | -130.1(13) |
| C(9)-N(3)-C(11)-C(13)     | 122.3(13)  |
| C(10)-N(3)-C(11)-C(13)    | -59.9(17)  |
| N(3)-C(11)-C(12)-C(13)    | 111.1(13)  |
| N(3)-C(11)-C(13)-C(12)    | -108.2(14) |
| N(2)-C(10)-Se(1)-C(14)    | -8.7(12)   |
| N(3)-C(10)-Se(1)-C(14)    | 175.6(8)   |
| Se(1)-C(14)-C(15)-C(16)   | 141.7(13)  |
| C(14)-C(15)-C(16)-C(16)#1 | -104(2)    |

---

Symmetry transformations used to generate equivalent atoms:

#1 -x+3/2,-y+1/2,-z+2

Table 17S. Hydrogen bonds for **5i** [Å and °].

| D-H...A              | d(D-H) | d(H...A) | d(D...A)  | <(DHA) |
|----------------------|--------|----------|-----------|--------|
| C(2)-H(2)...Cl(1)    | 0.93   | 2.58     | 3.222(14) | 127.0  |
| C(3)-H(3)...O(1)#2   | 0.93   | 2.66     | 3.455(14) | 143.9  |
| C(5)-H(5)...Cl(2)#3  | 0.93   | 2.84     | 3.676(13) | 149.9  |
| C(7)-H(7)...Cl(2)#3  | 0.93   | 2.79     | 3.667(12) | 156.7  |
| C(14)-H(14A)...Cl(1) | 0.97   | 2.88     | 3.716(15) | 145.0  |
| C(14)-H(14A)...N(2)  | 0.97   | 2.69     | 3.241(18) | 116.8  |

---

Symmetry transformations used to generate equivalent atoms:

#1  $-x+3/2, -y+1/2, -z+2$  #2  $x, y-1, z$  #3  $-x+1, -y+1, -z+1$

Table 18S. Crystal data and structure refinement for **6b** (CCDC 2017203).

|                                   |                                                                                   |                                                                           |
|-----------------------------------|-----------------------------------------------------------------------------------|---------------------------------------------------------------------------|
| Parameter                         | <b>6b</b> (CCDC 2017203)                                                          |                                                                           |
| Empirical formula                 | C <sub>34</sub> H <sub>23</sub> ClCuN <sub>8</sub> O <sub>6</sub> Se <sub>2</sub> |                                                                           |
| Formula weight                    | 904.51                                                                            |                                                                           |
| Temperature                       | 293(2) K                                                                          |                                                                           |
| Wavelength                        | 1.54186 Å                                                                         |                                                                           |
| Crystal system                    | Monoclinic                                                                        |                                                                           |
| Space group                       | P 21/c                                                                            |                                                                           |
| Unit cell dimensions              | $a = 20.283(2)$ Å<br>$b = 11.7660(10)$ Å<br>$c = 16.376(10)$ Å                    | $\alpha = 90^\circ$<br>$\beta = 104.470(10)^\circ$<br>$\gamma = 90^\circ$ |
| Volume                            | 3784(2) Å <sup>3</sup>                                                            |                                                                           |
| Z                                 | 4                                                                                 |                                                                           |
| Density (calculated)              | 1.588 Mg/m <sup>3</sup>                                                           |                                                                           |
| Absorption coefficient            | 4.137 mm <sup>-1</sup>                                                            |                                                                           |
| F(000)                            | 1796                                                                              |                                                                           |
| Theta range for data collection.  | 4.381 to 66.429°                                                                  |                                                                           |
| Index ranges                      | -22 ≤ h ≤ 24<br>-13 ≤ k ≤ 9<br>-19 ≤ l ≤ 19                                       |                                                                           |
| Reflections collected             | 34924                                                                             |                                                                           |
| Independent reflections           | 6523 [R <sub>(int)</sub> = 0.3224]                                                |                                                                           |
| Completeness to theta = 67.429°   | 98.3 %                                                                            |                                                                           |
| Refinement method                 | Full-matrix least-squares on F <sup>2</sup>                                       |                                                                           |
| Data / restraints / parameters    | 6523 / 7 / 480                                                                    |                                                                           |
| Goodness-of-fit on F <sup>2</sup> | 0.733                                                                             |                                                                           |
| Final R indices [I > 2σ(I)]       | R <sub>1</sub> = 0.0818, wR <sub>2</sub> = 0.1609                                 |                                                                           |
| R indices (all data)              | R <sub>1</sub> = 0.3000, wR <sub>2</sub> = 0.2125                                 |                                                                           |
| Extinction coefficient            | 0.00049(7)                                                                        |                                                                           |
| Largest diff. peak and hole       | 0.589 and -0.469 e.Å <sup>-3</sup>                                                |                                                                           |

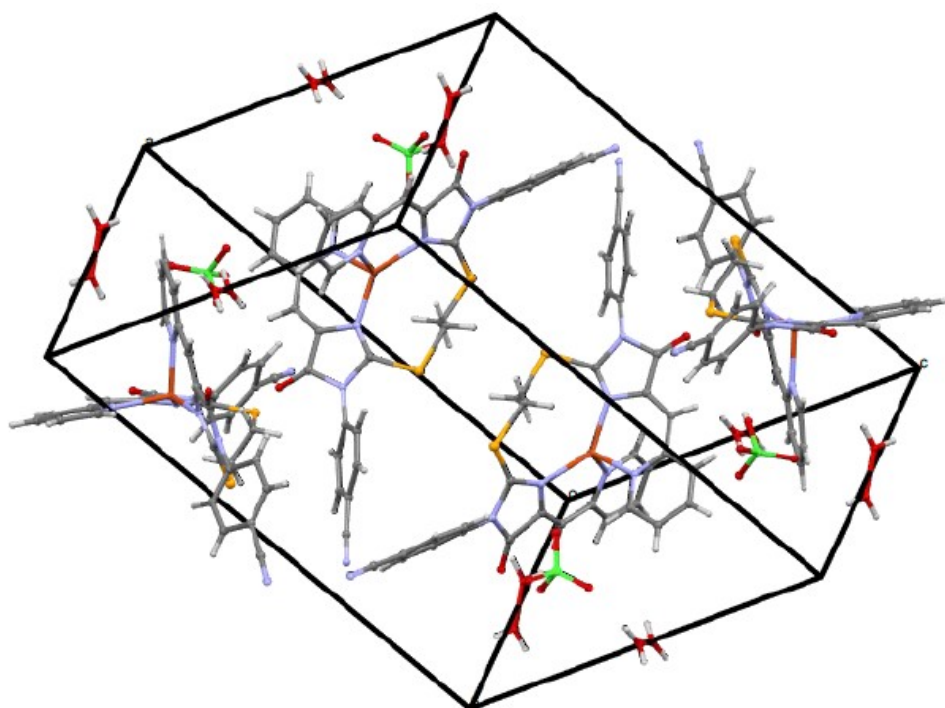

Table 19S. Bond lengths [Å] and angles [°] for **6b**.

|               |           |
|---------------|-----------|
| Se(1A)-C(10A) | 1.882(14) |
| Se(1A)-C(18A) | 1.987(10) |
| O(1A)-C(9A)   | 1.230(15) |
| N(1A)-C(2A)   | 1.307(15) |
| N(1A)-C(6A)   | 1.412(16) |
| N(1A)-Cu(1)   | 2.110(11) |
| N(2A)-C(10A)  | 1.264(15) |
| N(2A)-C(8A)   | 1.423(16) |
| N(2A)-Cu(1)   | 2.046(13) |
| N(3A)-C(11A)  | 1.421(15) |
| N(3A)-C(9A)   | 1.436(17) |
| N(3A)-C(10A)  | 1.477(18) |
| N(4A)-C(17A)  | 1.106(18) |
| C(2A)-C(3A)   | 1.410(19) |
| C(2A)-H(2A)   | 0.9300    |
| C(3A)-C(4A)   | 1.41(2)   |
| C(3A)-H(3A)   | 0.9300    |
| C(4A)-C(5A)   | 1.295(19) |
| C(4A)-H(4A)   | 0.9300    |
| C(5A)-C(6A)   | 1.40(2)   |
| C(5A)-H(5A)   | 0.9300    |
| C(6A)-C(7A)   | 1.415(18) |
| C(7A)-C(8A)   | 1.340(18) |
| C(7A)-H(7A)   | 0.9300    |
| C(8A)-C(9A)   | 1.483(18) |
| C(11A)-C(16A) | 1.397(16) |
| C(11A)-C(12A) | 1.422(18) |
| C(12A)-C(13A) | 1.353(18) |
| C(12A)-H(12A) | 0.9300    |
| C(13A)-C(14A) | 1.364(19) |
| C(13A)-H(13A) | 0.9300    |
| C(14A)-C(15A) | 1.394(19) |
| C(14A)-C(17A) | 1.46(2)   |
| C(15A)-C(16A) | 1.330(17) |
| C(15A)-H(15A) | 0.9300    |
| C(16A)-H(16A) | 0.9300    |
| C(18A)-C(18B) | 1.483(15) |
| C(18A)-H(18A) | 0.9700    |
| C(18A)-H(18B) | 0.9700    |
| Se(1B)-C(10B) | 1.673(14) |
| Se(1B)-C(18B) | 2.011(11) |
| O(1B)-C(9B)   | 1.207(15) |
| N(1B)-C(2B)   | 1.355(16) |
| N(1B)-C(6B)   | 1.38(2)   |
| N(1B)-Cu(1)   | 2.049(13) |
| N(2B)-C(8B)   | 1.317(18) |
| N(2B)-C(10B)  | 1.362(15) |
| N(2B)-Cu(1)   | 2.130(13) |
| N(3B)-C(9B)   | 1.366(17) |
| N(3B)-C(11B)  | 1.441(15) |

|                      |            |
|----------------------|------------|
| N(3B)-C(10B)         | 1.498(15)  |
| N(4B)-C(17B)         | 1.143(18)  |
| C(2B)-C(3B)          | 1.343(19)  |
| C(2B)-H(2B)          | 0.9300     |
| C(3B)-C(4B)          | 1.46(2)    |
| C(3B)-H(3B)          | 0.9300     |
| C(4B)-C(5B)          | 1.44(2)    |
| C(4B)-H(4B)          | 0.9300     |
| C(5B)-C(6B)          | 1.31(2)    |
| C(5B)-H(5B)          | 0.9300     |
| C(6B)-C(7B)          | 1.45(2)    |
| C(7B)-C(8B)          | 1.28(2)    |
| C(7B)-H(7B)          | 0.9300     |
| C(8B)-C(9B)          | 1.546(19)  |
| C(11B)-C(16B)        | 1.325(16)  |
| C(11B)-C(12B)        | 1.368(16)  |
| C(12B)-C(13B)        | 1.377(17)  |
| C(12B)-H(12B)        | 0.9300     |
| C(13B)-C(14B)        | 1.373(18)  |
| C(13B)-H(13B)        | 0.9300     |
| C(14B)-C(15B)        | 1.426(18)  |
| C(14B)-C(17B)        | 1.47(2)    |
| C(15B)-C(16B)        | 1.362(18)  |
| C(15B)-H(15B)        | 0.9300     |
| C(16B)-H(16B)        | 0.9300     |
| C(18B)-H(18C)        | 0.9700     |
| C(18B)-H(18D)        | 0.9700     |
| Cl(1)-O(52)          | 1.336(9)   |
| Cl(1)-O(54)          | 1.336(9)   |
| Cl(1)-O(53)          | 1.342(9)   |
| Cl(1)-O(51)          | 1.380(8)   |
| OW-OW#1              | 1.78(6)    |
| OW-H(1)              | 0.8600(11) |
| OW-H(11)             | 0.8600(11) |
| C(10A)-Se(1A)-C(18A) | 98.8(8)    |
| C(2A)-N(1A)-C(6A)    | 119.8(13)  |
| C(2A)-N(1A)-Cu(1)    | 119.0(12)  |
| C(6A)-N(1A)-Cu(1)    | 121.2(13)  |
| C(10A)-N(2A)-C(8A)   | 110.2(14)  |
| C(10A)-N(2A)-Cu(1)   | 133.1(12)  |
| C(8A)-N(2A)-Cu(1)    | 115.1(13)  |
| C(11A)-N(3A)-C(9A)   | 124.8(12)  |
| C(11A)-N(3A)-C(10A)  | 130.5(14)  |
| C(9A)-N(3A)-C(10A)   | 104.2(14)  |
| N(1A)-C(2A)-C(3A)    | 121.8(14)  |
| N(1A)-C(2A)-H(2A)    | 119.1      |
| C(3A)-C(2A)-H(2A)    | 119.1      |
| C(4A)-C(3A)-C(2A)    | 117.5(16)  |
| C(4A)-C(3A)-H(3A)    | 121.2      |
| C(2A)-C(3A)-H(3A)    | 121.2      |

|                      |           |
|----------------------|-----------|
| C(5A)-C(4A)-C(3A)    | 121.0(18) |
| C(5A)-C(4A)-H(4A)    | 119.5     |
| C(3A)-C(4A)-H(4A)    | 119.5     |
| C(4A)-C(5A)-C(6A)    | 121.6(18) |
| C(4A)-C(5A)-H(5A)    | 119.2     |
| C(6A)-C(5A)-H(5A)    | 119.2     |
| C(5A)-C(6A)-N(1A)    | 118.2(17) |
| C(5A)-C(6A)-C(7A)    | 119.8(19) |
| N(1A)-C(6A)-C(7A)    | 122.0(16) |
| C(8A)-C(7A)-C(6A)    | 130.0(15) |
| C(8A)-C(7A)-H(7A)    | 115.0     |
| C(6A)-C(7A)-H(7A)    | 115.0     |
| C(7A)-C(8A)-N(2A)    | 131.4(16) |
| C(7A)-C(8A)-C(9A)    | 121.9(15) |
| N(2A)-C(8A)-C(9A)    | 106.6(15) |
| O(1A)-C(9A)-N(3A)    | 123.3(15) |
| O(1A)-C(9A)-C(8A)    | 130.8(17) |
| N(3A)-C(9A)-C(8A)    | 105.8(15) |
| N(2A)-C(10A)-N(3A)   | 112.8(14) |
| N(2A)-C(10A)-Se(1A)  | 132.0(15) |
| N(3A)-C(10A)-Se(1A)  | 114.4(13) |
| C(16A)-C(11A)-N(3A)  | 118.6(16) |
| C(16A)-C(11A)-C(12A) | 120.3(15) |
| N(3A)-C(11A)-C(12A)  | 121.0(16) |
| C(13A)-C(12A)-C(11A) | 119.9(16) |
| C(13A)-C(12A)-H(12A) | 120.1     |
| C(11A)-C(12A)-H(12A) | 120.1     |
| C(12A)-C(13A)-C(14A) | 119.4(18) |
| C(12A)-C(13A)-H(13A) | 120.3     |
| C(14A)-C(13A)-H(13A) | 120.3     |
| C(13A)-C(14A)-C(15A) | 119.9(18) |
| C(13A)-C(14A)-C(17A) | 118.9(18) |
| C(15A)-C(14A)-C(17A) | 121.0(17) |
| C(16A)-C(15A)-C(14A) | 123.2(16) |
| C(16A)-C(15A)-H(15A) | 118.4     |
| C(14A)-C(15A)-H(15A) | 118.4     |
| C(15A)-C(16A)-C(11A) | 117.1(14) |
| C(15A)-C(16A)-H(16A) | 121.5     |
| C(11A)-C(16A)-H(16A) | 121.5     |
| N(4A)-C(17A)-C(14A)  | 175.4(18) |
| C(18B)-C(18A)-Se(1A) | 108.1(7)  |
| C(18B)-C(18A)-H(18A) | 110.1     |
| Se(1A)-C(18A)-H(18A) | 110.1     |
| C(18B)-C(18A)-H(18B) | 110.1     |
| Se(1A)-C(18A)-H(18B) | 110.1     |
| H(18A)-C(18A)-H(18B) | 108.4     |
| C(10B)-Se(1B)-C(18B) | 102.2(7)  |
| C(2B)-N(1B)-C(6B)    | 121.7(15) |
| C(2B)-N(1B)-Cu(1)    | 119.0(13) |
| C(6B)-N(1B)-Cu(1)    | 118.8(13) |

|                     |           |
|---------------------|-----------|
| C(8B)-N(2B)-C(10B)  | 117.3(13) |
| C(8B)-N(2B)-Cu(1)   | 109.2(12) |
| C(10B)-N(2B)-Cu(1)  | 133.4(10) |
| C(9B)-N(3B)-C(11B)  | 124.4(12) |
| C(9B)-N(3B)-C(10B)  | 114.6(15) |
| C(11B)-N(3B)-C(10B) | 120.8(15) |
| C(3B)-C(2B)-N(1B)   | 122.3(15) |
| C(3B)-C(2B)-H(2B)   | 118.9     |
| N(1B)-C(2B)-H(2B)   | 118.9     |
| C(2B)-C(3B)-C(4B)   | 121.7(17) |
| C(2B)-C(3B)-H(3B)   | 119.1     |
| C(4B)-C(3B)-H(3B)   | 119.1     |
| C(5B)-C(4B)-C(3B)   | 108.4(15) |
| C(5B)-C(4B)-H(4B)   | 125.8     |
| C(3B)-C(4B)-H(4B)   | 125.8     |
| C(6B)-C(5B)-C(4B)   | 131(2)    |
| C(6B)-C(5B)-H(5B)   | 114.4     |
| C(4B)-C(5B)-H(5B)   | 114.4     |
| C(5B)-C(6B)-N(1B)   | 115(2)    |
| C(5B)-C(6B)-C(7B)   | 123(2)    |
| N(1B)-C(6B)-C(7B)   | 122.8(15) |
| C(8B)-C(7B)-C(6B)   | 128.3(17) |
| C(8B)-C(7B)-H(7B)   | 115.9     |
| C(6B)-C(7B)-H(7B)   | 115.9     |
| C(7B)-C(8B)-N(2B)   | 138.6(18) |

|                      |           |
|----------------------|-----------|
| C(7B)-C(8B)-C(9B)    | 114.4(19) |
| N(2B)-C(8B)-C(9B)    | 106.9(14) |
| O(1B)-C(9B)-N(3B)    | 129.6(15) |
| O(1B)-C(9B)-C(8B)    | 129.5(18) |
| N(3B)-C(9B)-C(8B)    | 100.9(15) |
| N(2B)-C(10B)-N(3B)   | 99.8(12)  |
| N(2B)-C(10B)-Se(1B)  | 132.6(13) |
| N(3B)-C(10B)-Se(1B)  | 127.4(13) |
| C(16B)-C(11B)-C(12B) | 126.8(15) |
| C(16B)-C(11B)-N(3B)  | 117.8(16) |
| C(12B)-C(11B)-N(3B)  | 115.4(15) |
| C(11B)-C(12B)-C(13B) | 116.8(14) |
| C(11B)-C(12B)-H(12B) | 121.6     |
| C(13B)-C(12B)-H(12B) | 121.6     |
| C(14B)-C(13B)-C(12B) | 119.5(15) |
| C(14B)-C(13B)-H(13B) | 120.2     |
| C(12B)-C(13B)-H(13B) | 120.2     |
| C(13B)-C(14B)-C(15B) | 120.1(15) |
| C(13B)-C(14B)-C(17B) | 125.0(16) |
| C(15B)-C(14B)-C(17B) | 114.9(18) |
| C(16B)-C(15B)-C(14B) | 119.6(14) |
| C(16B)-C(15B)-H(15B) | 120.2     |
| C(14B)-C(15B)-H(15B) | 120.2     |
| C(11B)-C(16B)-C(15B) | 117.1(15) |
| C(11B)-C(16B)-H(16B) | 121.5     |

|                      |           |
|----------------------|-----------|
| C(15B)-C(16B)-H(16B) | 121.5     |
| N(4B)-C(17B)-C(14B)  | 177.9(19) |
| C(18A)-C(18B)-Se(1B) | 108.9(7)  |
| C(18A)-C(18B)-H(18C) | 109.9     |
| Se(1B)-C(18B)-H(18C) | 109.9     |
| C(18A)-C(18B)-H(18D) | 109.9     |
| Se(1B)-C(18B)-H(18D) | 109.9     |
| H(18C)-C(18B)-H(18D) | 108.3     |
| N(2A)-Cu(1)-N(1B)    | 107.6(6)  |
| N(2A)-Cu(1)-N(1A)    | 96.0(6)   |
| N(1B)-Cu(1)-N(1A)    | 102.9(4)  |
| N(2A)-Cu(1)-N(2B)    | 138.4(6)  |
| N(1B)-Cu(1)-N(2B)    | 97.4(6)   |
| N(1A)-Cu(1)-N(2B)    | 110.4(5)  |
| O(52)-Cl(1)-O(54)    | 95.1(15)  |
| O(52)-Cl(1)-O(53)    | 109.1(16) |
| O(54)-Cl(1)-O(53)    | 111.5(14) |
| O(52)-Cl(1)-O(51)    | 112.7(13) |
| O(54)-Cl(1)-O(51)    | 107.5(11) |
| O(53)-Cl(1)-O(51)    | 118.5(11) |
| OW#1-OW-H(1)         | 135(6)    |
| OW#1-OW-H(11)        | 120(6)    |
| H(1)-OW-H(11)        | 104.6(11) |

---

Symmetry transformations used to generate equivalent atoms:

#1 -x,-y,-z+1

Table 20S. Torsion angles [°] for **6b**.

|                             |            |
|-----------------------------|------------|
| C(6A)-N(1A)-C(2A)-C(3A)     | -4(2)      |
| Cu(1)-N(1A)-C(2A)-C(3A)     | 177.1(12)  |
| N(1A)-C(2A)-C(3A)-C(4A)     | 3(2)       |
| C(2A)-C(3A)-C(4A)-C(5A)     | -1(3)      |
| C(3A)-C(4A)-C(5A)-C(6A)     | 0(3)       |
| C(4A)-C(5A)-C(6A)-N(1A)     | 0(3)       |
| C(4A)-C(5A)-C(6A)-C(7A)     | -179.9(19) |
| C(2A)-N(1A)-C(6A)-C(5A)     | 2(2)       |
| Cu(1)-N(1A)-C(6A)-C(5A)     | -178.9(12) |
| C(2A)-N(1A)-C(6A)-C(7A)     | -178.1(14) |
| Cu(1)-N(1A)-C(6A)-C(7A)     | 1.1(18)    |
| C(5A)-C(6A)-C(7A)-C(8A)     | -167.4(18) |
| N(1A)-C(6A)-C(7A)-C(8A)     | 13(3)      |
| C(6A)-C(7A)-C(8A)-N(2A)     | -4(3)      |
| C(6A)-C(7A)-C(8A)-C(9A)     | 176.4(14)  |
| C(10A)-N(2A)-C(8A)-C(7A)    | 176.4(17)  |
| Cu(1)-N(2A)-C(8A)-C(7A)     | -16(2)     |
| C(10A)-N(2A)-C(8A)-C(9A)    | -4.0(16)   |
| Cu(1)-N(2A)-C(8A)-C(9A)     | 163.8(8)   |
| C(11A)-N(3A)-C(9A)-O(1A)    | 6(2)       |
| C(10A)-N(3A)-C(9A)-O(1A)    | 178.7(12)  |
| C(11A)-N(3A)-C(9A)-C(8A)    | -178.2(12) |
| C(10A)-N(3A)-C(9A)-C(8A)    | -5.9(12)   |
| C(7A)-C(8A)-C(9A)-O(1A)     | 1(2)       |
| N(2A)-C(8A)-C(9A)-O(1A)     | -178.8(13) |
| C(7A)-C(8A)-C(9A)-N(3A)     | -174.2(14) |
| N(2A)-C(8A)-C(9A)-N(3A)     | 6.2(13)    |
| C(8A)-N(2A)-C(10A)-N(3A)    | 0.1(17)    |
| Cu(1)-N(2A)-C(10A)-N(3A)    | -164.7(9)  |
| C(8A)-N(2A)-C(10A)-Se(1A)   | -168.2(10) |
| Cu(1)-N(2A)-C(10A)-Se(1A)   | 27(2)      |
| C(11A)-N(3A)-C(10A)-N(2A)   | 175.6(14)  |
| C(9A)-N(3A)-C(10A)-N(2A)    | 3.8(16)    |
| C(11A)-N(3A)-C(10A)-Se(1A)  | -13.9(18)  |
| C(9A)-N(3A)-C(10A)-Se(1A)   | 174.3(9)   |
| C(18A)-Se(1A)-C(10A)-N(2A)  | 4.7(17)    |
| C(18A)-Se(1A)-C(10A)-N(3A)  | -163.5(10) |
| C(9A)-N(3A)-C(11A)-C(16A)   | 119.4(14)  |
| C(10A)-N(3A)-C(11A)-C(16A)  | -51(2)     |
| C(9A)-N(3A)-C(11A)-C(12A)   | -62.3(18)  |
| C(10A)-N(3A)-C(11A)-C(12A)  | 127.4(14)  |
| C(16A)-C(11A)-C(12A)-C(13A) | -4(2)      |
| N(3A)-C(11A)-C(12A)-C(13A)  | 177.8(14)  |
| C(11A)-C(12A)-C(13A)-C(14A) | 1(2)       |
| C(12A)-C(13A)-C(14A)-C(15A) | 2(3)       |
| C(12A)-C(13A)-C(14A)-C(17A) | -172.8(14) |
| C(13A)-C(14A)-C(15A)-C(16A) | 0(3)       |
| C(17A)-C(14A)-C(15A)-C(16A) | 174.1(15)  |
| C(14A)-C(15A)-C(16A)-C(11A) | -3(2)      |
| N(3A)-C(11A)-C(16A)-C(15A)  | -176.5(14) |
| C(12A)-C(11A)-C(16A)-C(15A) | 5(2)       |
| C(6B)-N(1B)-C(2B)-C(3B)     | 1(2)       |
| Cu(1)-N(1B)-C(2B)-C(3B)     | 172.1(12)  |

|                             |            |
|-----------------------------|------------|
| N(1B)-C(2B)-C(3B)-C(4B)     | -4(2)      |
| C(2B)-C(3B)-C(4B)-C(5B)     | 4(2)       |
| C(3B)-C(4B)-C(5B)-C(6B)     | -3(3)      |
| C(4B)-C(5B)-C(6B)-N(1B)     | 0(3)       |
| C(4B)-C(5B)-C(6B)-C(7B)     | 179.0(15)  |
| C(2B)-N(1B)-C(6B)-C(5B)     | 1(2)       |
| Cu(1)-N(1B)-C(6B)-C(5B)     | -170.4(11) |
| C(2B)-N(1B)-C(6B)-C(7B)     | -177.9(12) |
| Cu(1)-N(1B)-C(6B)-C(7B)     | 10.7(16)   |
| C(5B)-C(6B)-C(7B)-C(8B)     | -174.6(17) |
| N(1B)-C(6B)-C(7B)-C(8B)     | 4(2)       |
| C(6B)-C(7B)-C(8B)-N(2B)     | 0(3)       |
| C(6B)-C(7B)-C(8B)-C(9B)     | 175.7(12)  |
| C(10B)-N(2B)-C(8B)-C(7B)    | 167.7(17)  |
| Cu(1)-N(2B)-C(8B)-C(7B)     | -16(2)     |
| C(10B)-N(2B)-C(8B)-C(9B)    | -7.8(14)   |
| Cu(1)-N(2B)-C(8B)-C(9B)     | 168.1(7)   |
| C(11B)-N(3B)-C(9B)-O(1B)    | 5(2)       |
| C(10B)-N(3B)-C(9B)-O(1B)    | -179.9(12) |
| C(11B)-N(3B)-C(9B)-C(8B)    | -174.1(12) |
| C(10B)-N(3B)-C(9B)-C(8B)    | 1.4(12)    |
| C(7B)-C(8B)-C(9B)-O(1B)     | 8(2)       |
| N(2B)-C(8B)-C(9B)-O(1B)     | -175.3(13) |
| C(7B)-C(8B)-C(9B)-N(3B)     | -173.4(12) |
| N(2B)-C(8B)-C(9B)-N(3B)     | 3.4(13)    |
| C(8B)-N(2B)-C(10B)-N(3B)    | 8.1(13)    |
| Cu(1)-N(2B)-C(10B)-N(3B)    | -166.5(8)  |
| C(8B)-N(2B)-C(10B)-Se(1B)   | -167.6(10) |
| Cu(1)-N(2B)-C(10B)-Se(1B)   | 17.8(18)   |
| C(9B)-N(3B)-C(10B)-N(2B)    | -5.5(12)   |
| C(11B)-N(3B)-C(10B)-N(2B)   | 170.3(11)  |
| C(9B)-N(3B)-C(10B)-Se(1B)   | 170.6(9)   |
| C(11B)-N(3B)-C(10B)-Se(1B)  | -13.7(16)  |
| C(18B)-Se(1B)-C(10B)-N(2B)  | 12.5(13)   |
| C(18B)-Se(1B)-C(10B)-N(3B)  | -162.2(9)  |
| C(9B)-N(3B)-C(11B)-C(16B)   | 129.5(15)  |
| C(10B)-N(3B)-C(11B)-C(16B)  | -45.8(19)  |
| C(9B)-N(3B)-C(11B)-C(12B)   | -50.6(18)  |
| C(10B)-N(3B)-C(11B)-C(12B)  | 134.1(12)  |
| C(16B)-C(11B)-C(12B)-C(13B) | 0(2)       |
| N(3B)-C(11B)-C(12B)-C(13B)  | -179.7(14) |
| C(11B)-C(12B)-C(13B)-C(14B) | 1(2)       |
| C(12B)-C(13B)-C(14B)-C(15B) | 1(2)       |
| C(12B)-C(13B)-C(14B)-C(17B) | 178.9(14)  |
| C(13B)-C(14B)-C(15B)-C(16B) | -2(2)      |
| C(17B)-C(14B)-C(15B)-C(16B) | 179.0(15)  |
| C(12B)-C(11B)-C(16B)-C(15B) | -2(3)      |
| N(3B)-C(11B)-C(16B)-C(15B)  | 177.8(14)  |
| C(14B)-C(15B)-C(16B)-C(11B) | 3(2)       |
| Se(1A)-C(18A)-C(18B)-Se(1B) | 176.2(7)   |

Symmetry transformations used to generate equivalent atoms:

#1 -x,-y,-z+1

Table 21S. Hydrogen bonds for **6b** [E and °].

| D-H...A                 | d(D-H)     | d(H...A) | d(D...A)  | <(DHA) |
|-------------------------|------------|----------|-----------|--------|
| C(12A)-H(12A)...N(4A)#2 | 0.93       | 2.67     | 3.47(2)   | 144.5  |
| C(16A)-H(16A)...O(54)   | 0.93       | 2.53     | 3.30(2)   | 141.3  |
| C(18A)-H(18A)...N(4A)#3 | 0.97       | 2.49     | 3.20(2)   | 130.4  |
| C(18A)-H(18B)...N(2B)   | 0.97       | 2.45     | 3.171(19) | 131.3  |
| C(16B)-H(16B)...O(51)#4 | 0.93       | 2.54     | 3.32(2)   | 140.7  |
| C(18B)-H(18D)...N(2A)   | 0.97       | 2.50     | 3.232(17) | 131.8  |
| OW-H(11)...O(53)        | 0.8600(11) | 2.54(6)  | 3.02(3)   | 116(5) |

---

Symmetry transformations used to generate equivalent atoms:

#1 -x,-y,-z+1 #2 -x+1,y+1/2,-z+3/2 #3 -x+1,-y,-z+1 #4 x,y+1,z



Table 22S. Crystal data and structure refinement for **6c** (CCDC 2125345).

| Parameter                            | <b>6c</b> (CCDC 2125345)                                                                        |                                                                         |
|--------------------------------------|-------------------------------------------------------------------------------------------------|-------------------------------------------------------------------------|
| Empirical formula                    | C <sub>34</sub> H <sub>21</sub> Cl <sub>3</sub> CuN <sub>7</sub> O <sub>6</sub> Se <sub>2</sub> |                                                                         |
| Formula weight                       | 951.39                                                                                          |                                                                         |
| Temperature                          | 293(2) K                                                                                        |                                                                         |
| Wavelength                           | 1.54186 Å                                                                                       |                                                                         |
| Crystal system                       | Monoclinic                                                                                      |                                                                         |
| Space group                          | P 21/c                                                                                          |                                                                         |
| Unit cell dimensions                 | $a = 8.1846(4)$ Å<br>$b = 13.6156(7)$ Å<br>$c = 33.9630(10)$ Å                                  | $\alpha = 90^\circ$<br>$\beta = 93.899(4)^\circ$<br>$\gamma = 90^\circ$ |
| Volume                               | 3776.0(3) Å <sup>3</sup>                                                                        |                                                                         |
| Z                                    | 4                                                                                               |                                                                         |
| Density (calculated)                 | 1.647 Mg/m <sup>3</sup>                                                                         |                                                                         |
| Absorption coefficient               | 5.434 mm <sup>-1</sup>                                                                          |                                                                         |
| $F(000)$                             | 1880                                                                                            |                                                                         |
| Theta range for data collection.     | 2,608 to 66.780°                                                                                |                                                                         |
| Index ranges                         | -9 ≤ h ≤ 4<br>-16 ≤ k ≤ 16<br>-40 ≤ l ≤ 40                                                      |                                                                         |
| Reflections collected                | 12034                                                                                           |                                                                         |
| Independent reflections              | 12034 [ $R_{\text{(int)}} = 0.1724$ ]                                                           |                                                                         |
| Completeness to theta = 66.780°      | 83.8 %                                                                                          |                                                                         |
| Refinement method                    | Full-matrix least-squares on $F^2$                                                              |                                                                         |
| Data / restraints / parameters       | 12034 / 18 / 480                                                                                |                                                                         |
| Goodness-of-fit on $F^2$             | 0.837                                                                                           |                                                                         |
| Final R indices [ $I > 2\sigma(I)$ ] | $R_1 = 0.0931$ , $wR_2 = 0.2189$                                                                |                                                                         |
| R indices (all data)                 | $R_1 = 0.1701$ , $wR_2 = 0.2448$                                                                |                                                                         |
| Extinction coefficient               | n/a                                                                                             |                                                                         |
| Largest diff. peak and hole          | 1.354 and -1.131 e.e Å <sup>-3</sup>                                                            |                                                                         |

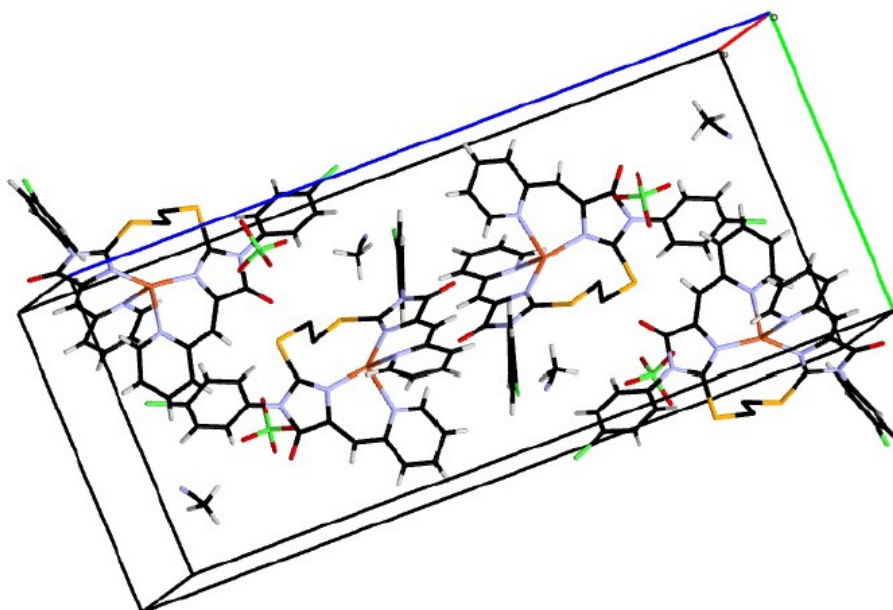

Table 23S. Bond lengths [ $\text{\AA}$ ] and angles [ $^\circ$ ] for **6c**.

|               |           |                     |           |
|---------------|-----------|---------------------|-----------|
| Cu(1)-N(1A)   | 1.971(15) | C(4B)-C(5B)         | 1.28(2)   |
| Cu(1)-N(1B)   | 1.982(11) | C(5B)-C(6B)         | 1.44(2)   |
| Cu(1)-N(3B)   | 2.116(15) | C(5B)-H(5B)         | 0.9300    |
| Cu(1)-N(3A)   | 2.123(15) | C(6B)-C(7B)         | 1.45(2)   |
| Se(1A)-C(2A)  | 1.83(2)   | C(7B)-C(8B)         | 1.36(2)   |
| Se(1A)-C(17A) | 1.890(16) | C(7B)-H(7B)         | 0.9300    |
| Cl(2A)-C(14A) | 1.72(2)   | C(8B)-C(9B)         | 1.41(3)   |
| O(1A)-C(3A)   | 1.183(15) | C(8B)-H(8B)         | 0.9300    |
| N(1A)-C(2A)   | 1.37(2)   | C(9B)-C(10B)        | 1.35(3)   |
| N(1A)-C(4A)   | 1.455(17) | C(9B)-H(9B)         | 0.9300    |
| N(2A)-C(3A)   | 1.41(2)   | C(10B)-H(10B)       | 0.9300    |
| N(2A)-C(2A)   | 1.418(17) | C(11B)-C(12B)       | 1.37(2)   |
| N(2A)-C(11A)  | 1.47(2)   | C(11B)-C(16B)       | 1.40(2)   |
| N(3A)-C(6A)   | 1.304(18) | C(12B)-C(13B)       | 1.40(2)   |
| N(3A)-C(10A)  | 1.34(2)   | C(12B)-H(12B)       | 0.9300    |
| C(3A)-C(4A)   | 1.48(2)   | C(13B)-C(14B)       | 1.33(3)   |
| C(4A)-C(5A)   | 1.33(2)   | C(13B)-H(13B)       | 0.9300    |
| C(5A)-C(6A)   | 1.48(2)   | C(14B)-C(15B)       | 1.36(3)   |
| C(5A)-H(5A)   | 0.9300    | C(15B)-C(16B)       | 1.37(2)   |
| C(6A)-C(7A)   | 1.39(3)   | C(15B)-H(15B)       | 0.9300    |
| C(7A)-C(8A)   | 1.33(2)   | C(16B)-H(16B)       | 0.9300    |
| C(7A)-H(7A)   | 0.9300    | N(5)-C(18)          | 1.16(3)   |
| C(8A)-C(9A)   | 1.33(2)   | C(18)-C(19)         | 1.44(4)   |
| C(8A)-H(8A)   | 0.9300    | C(19)-H(19A)        | 0.9600    |
| C(9A)-C(10A)  | 1.40(3)   | C(19)-H(19B)        | 0.9600    |
| C(9A)-H(9A)   | 0.9300    | C(19)-H(19C)        | 0.9600    |
| C(10A)-H(10A) | 0.9300    | N(1A)-Cu(1)-N(1B)   | 143.7(6)  |
| C(11A)-C(16A) | 1.37(2)   | N(1A)-Cu(1)-N(3B)   | 107.4(5)  |
| C(11A)-C(12A) | 1.37(3)   | N(1B)-Cu(1)-N(3B)   | 97.8(5)   |
| C(12A)-C(13A) | 1.39(3)   | N(1A)-Cu(1)-N(3A)   | 93.1(6)   |
| C(12A)-H(12A) | 0.9300    | N(1B)-Cu(1)-N(3A)   | 112.3(6)  |
| C(13A)-C(14A) | 1.32(3)   | N(3B)-Cu(1)-N(3A)   | 91.6(6)   |
| C(13A)-H(13A) | 0.9300    | C(2A)-Se(1A)-C(17A) | 99.3(7)   |
| C(14A)-C(15A) | 1.45(3)   | C(2A)-N(1A)-C(4A)   | 105.3(13) |
| C(15A)-C(16A) | 1.43(3)   | C(2A)-N(1A)-Cu(1)   | 135.8(11) |
| C(15A)-H(15A) | 0.9300    | C(4A)-N(1A)-Cu(1)   | 118.2(12) |
| C(16A)-H(16A) | 0.9300    | C(3A)-N(2A)-C(2A)   | 109.4(14) |
| C(17A)-C(17B) | 1.55(3)   | C(3A)-N(2A)-C(11A)  | 125.9(12) |
| Cl(1)-O(3)    | 1.406(12) | C(2A)-N(2A)-C(11A)  | 124.6(15) |
| Cl(1)-O(4)    | 1.430(16) | C(6A)-N(3A)-C(10A)  | 116.9(16) |
| Cl(1)-O(5)    | 1.447(15) | C(6A)-N(3A)-Cu(1)   | 121.1(12) |
| Cl(1)-O(2)    | 1.450(14) | C(10A)-N(3A)-Cu(1)  | 116.9(12) |
| Se(1B)-C(2B)  | 1.889(17) | N(1A)-C(2A)-N(2A)   | 111.8(15) |
| Se(1B)-C(17B) | 1.942(16) | N(1A)-C(2A)-Se(1A)  | 129.1(11) |
| Cl(2B)-C(14B) | 1.744(16) | N(2A)-C(2A)-Se(1A)  | 118.9(15) |
| O(1B)-C(3B)   | 1.231(18) | O(1A)-C(3A)-N(2A)   | 125.6(15) |
| N(1B)-C(2B)   | 1.316(17) | O(1A)-C(3A)-C(4A)   | 130.3(16) |
| N(1B)-C(4B)   | 1.52(2)   | N(2A)-C(3A)-C(4A)   | 104.0(11) |
| N(2B)-C(2B)   | 1.338(17) | C(5A)-C(4A)-N(1A)   | 128.0(15) |
| N(2B)-C(3B)   | 1.40(2)   | C(5A)-C(4A)-C(3A)   | 122.6(13) |
| N(2B)-C(11B)  | 1.445(18) | N(1A)-C(4A)-C(3A)   | 109.4(15) |
| N(3B)-C(10B)  | 1.316(17) | C(4A)-C(5A)-C(6A)   | 129.5(14) |
| N(3B)-C(6B)   | 1.38(2)   | C(4A)-C(5A)-H(5A)   | 115.2     |
| C(3B)-C(4B)   | 1.412(19) | C(6A)-C(5A)-H(5A)   | 115.2     |

|                      |           |
|----------------------|-----------|
| N(3A)-C(6A)-C(7A)    | 123.9(16) |
| N(3A)-C(6A)-C(5A)    | 119.3(18) |
| C(7A)-C(6A)-C(5A)    | 116.8(14) |
| C(8A)-C(7A)-C(6A)    | 117.5(17) |
| C(8A)-C(7A)-H(7A)    | 121.3     |
| C(6A)-C(7A)-H(7A)    | 121.3     |
| C(7A)-C(8A)-C(9A)    | 121(2)    |
| C(7A)-C(8A)-H(8A)    | 119.4     |
| C(9A)-C(8A)-H(8A)    | 119.4     |
| C(8A)-C(9A)-C(10A)   | 118.3(18) |
| C(8A)-C(9A)-H(9A)    | 120.9     |
| C(10A)-C(9A)-H(9A)   | 120.9     |
| N(3A)-C(10A)-C(9A)   | 121.3(14) |
| N(3A)-C(10A)-H(10A)  | 119.4     |
| C(9A)-C(10A)-H(10A)  | 119.4     |
| C(16A)-C(11A)-C(12A) | 124(2)    |
| C(16A)-C(11A)-N(2A)  | 119.2(19) |
| C(12A)-C(11A)-N(2A)  | 116.8(19) |
| C(11A)-C(12A)-C(13A) | 119(2)    |
| C(11A)-C(12A)-H(12A) | 120.7     |
| C(13A)-C(12A)-H(12A) | 120.7     |
| C(14A)-C(13A)-C(12A) | 120(2)    |
| C(14A)-C(13A)-H(13A) | 120.0     |
| C(12A)-C(13A)-H(13A) | 120.0     |
| C(13A)-C(14A)-C(15A) | 123(2)    |
| C(13A)-C(14A)-Cl(2A) | 122(2)    |
| C(15A)-C(14A)-Cl(2A) | 115(2)    |
| C(16A)-C(15A)-C(14A) | 116(2)    |
| C(16A)-C(15A)-H(15A) | 122.2     |
| C(14A)-C(15A)-H(15A) | 122.2     |
| C(11A)-C(16A)-C(15A) | 118(2)    |
| C(11A)-C(16A)-H(16A) | 121.0     |
| C(15A)-C(16A)-H(16A) | 121.0     |
| C(17B)-C(17A)-Se(1A) | 113.4(12) |
| O(3)-Cl(1)-O(4)      | 107.6(11) |
| O(3)-Cl(1)-O(5)      | 115.5(13) |
| O(4)-Cl(1)-O(5)      | 103.5(11) |
| O(3)-Cl(1)-O(2)      | 111.9(10) |
| O(4)-Cl(1)-O(2)      | 107.1(11) |
| O(5)-Cl(1)-O(2)      | 110.5(10) |
| C(2B)-Se(1B)-C(17B)  | 99.3(8)   |
| C(2B)-N(1B)-C(4B)    | 102.6(11) |
| C(2B)-N(1B)-Cu(1)    | 140.7(12) |
| C(4B)-N(1B)-Cu(1)    | 115.9(10) |
| C(2B)-N(2B)-C(3B)    | 106.7(11) |
| C(2B)-N(2B)-C(11B)   | 128.2(15) |
| C(3B)-N(2B)-C(11B)   | 125.1(12) |
| C(10B)-N(3B)-C(6B)   | 119.0(17) |
| C(10B)-N(3B)-Cu(1)   | 120.9(13) |
| C(6B)-N(3B)-Cu(1)    | 119.0(10) |
| N(1B)-C(2B)-N(2B)    | 116.9(15) |
| N(1B)-C(2B)-Se(1B)   | 124.9(11) |
| N(2B)-C(2B)-Se(1B)   | 118.3(11) |

|                      |           |
|----------------------|-----------|
| O(1B)-C(3B)-N(2B)    | 122.5(13) |
| O(1B)-C(3B)-C(4B)    | 129.2(19) |
| N(2B)-C(3B)-C(4B)    | 108.0(14) |
| C(5B)-C(4B)-C(3B)    | 125.8(18) |
| C(5B)-C(4B)-N(1B)    | 128.3(15) |
| C(3B)-C(4B)-N(1B)    | 105.8(15) |
| C(4B)-C(5B)-C(6B)    | 131.5(18) |
| C(4B)-C(5B)-H(5B)    | 114.3     |
| C(6B)-C(5B)-H(5B)    | 114.3     |
| N(3B)-C(6B)-C(5B)    | 123.9(17) |
| N(3B)-C(6B)-C(7B)    | 118.7(14) |
| C(5B)-C(6B)-C(7B)    | 117.3(15) |
| C(8B)-C(7B)-C(6B)    | 118.9(17) |
| C(8B)-C(7B)-H(7B)    | 120.5     |
| C(6B)-C(7B)-H(7B)    | 120.5     |
| C(7B)-C(8B)-C(9B)    | 120(2)    |
| C(7B)-C(8B)-H(8B)    | 119.9     |
| C(9B)-C(8B)-H(8B)    | 119.9     |
| C(10B)-C(9B)-C(8B)   | 117.3(19) |
| C(10B)-C(9B)-H(9B)   | 121.3     |
| C(8B)-C(9B)-H(9B)    | 121.3     |
| N(3B)-C(10B)-C(9B)   | 126(2)    |
| N(3B)-C(10B)-H(10B)  | 117.2     |
| C(9B)-C(10B)-H(10B)  | 117.2     |
| C(12B)-C(11B)-C(16B) | 121.3(15) |
| C(12B)-C(11B)-N(2B)  | 120.1(15) |
| C(16B)-C(11B)-N(2B)  | 118.5(16) |
| C(11B)-C(12B)-C(13B) | 116.9(17) |
| C(11B)-C(12B)-H(12B) | 121.6     |
| C(13B)-C(12B)-H(12B) | 121.6     |
| C(14B)-C(13B)-C(12B) | 122(2)    |
| C(14B)-C(13B)-H(13B) | 118.9     |
| C(12B)-C(13B)-H(13B) | 118.9     |
| C(13B)-C(14B)-C(15B) | 120.4(17) |
| C(13B)-C(14B)-Cl(2B) | 121(2)    |
| C(15B)-C(14B)-Cl(2B) | 118.7(17) |
| C(14B)-C(15B)-C(16B) | 120.5(18) |
| C(14B)-C(15B)-H(15B) | 119.7     |
| C(16B)-C(15B)-H(15B) | 119.7     |
| C(15B)-C(16B)-C(11B) | 118.5(18) |
| C(15B)-C(16B)-H(16B) | 120.7     |
| C(11B)-C(16B)-H(16B) | 120.7     |
| C(17A)-C(17B)-Se(1B) | 114.6(12) |
| N(5)-C(18)-C(19)     | 177(4)    |
| C(18)-C(19)-H(19A)   | 109.5     |
| C(18)-C(19)-H(19B)   | 109.5     |
| H(19A)-C(19)-H(19B)  | 109.5     |
| C(18)-C(19)-H(19C)   | 109.5     |
| H(19A)-C(19)-H(19C)  | 109.5     |
| H(19B)-C(19)-H(19C)  | 109.5     |

Table 24S. Torsion angles [°] for **6c**.

|                             |            |
|-----------------------------|------------|
| C(4A)-N(1A)-C(2A)-N(2A)     | -2(2)      |
| Cu(1)-N(1A)-C(2A)-N(2A)     | 168.0(12)  |
| C(4A)-N(1A)-C(2A)-Se(1A)    | 173.2(14)  |
| Cu(1)-N(1A)-C(2A)-Se(1A)    | -17(3)     |
| C(3A)-N(2A)-C(2A)-N(1A)     | 3(2)       |
| C(11A)-N(2A)-C(2A)-N(1A)    | -179.0(17) |
| C(3A)-N(2A)-C(2A)-Se(1A)    | -172.5(14) |
| C(11A)-N(2A)-C(2A)-Se(1A)   | 5(2)       |
| C(17A)-Se(1A)-C(2A)-N(1A)   | -6(2)      |
| C(17A)-Se(1A)-C(2A)-N(2A)   | 169.0(14)  |
| C(2A)-N(2A)-C(3A)-O(1A)     | -179.7(19) |
| C(11A)-N(2A)-C(3A)-O(1A)    | 3(3)       |
| C(2A)-N(2A)-C(3A)-C(4A)     | -3.0(19)   |
| C(11A)-N(2A)-C(3A)-C(4A)    | 179.4(16)  |
| C(2A)-N(1A)-C(4A)-C(5A)     | -179.3(19) |
| Cu(1)-N(1A)-C(4A)-C(5A)     | 8(3)       |
| C(2A)-N(1A)-C(4A)-C(3A)     | 0(2)       |
| Cu(1)-N(1A)-C(4A)-C(3A)     | -172.0(11) |
| O(1A)-C(3A)-C(4A)-C(5A)     | -2(3)      |
| N(2A)-C(3A)-C(4A)-C(5A)     | -178.7(18) |
| O(1A)-C(3A)-C(4A)-N(1A)     | 178(2)     |
| N(2A)-C(3A)-C(4A)-N(1A)     | 1.7(19)    |
| N(1A)-C(4A)-C(5A)-C(6A)     | 6(3)       |
| C(3A)-C(4A)-C(5A)-C(6A)     | -173.9(18) |
| C(10A)-N(3A)-C(6A)-C(7A)    | -6(3)      |
| Cu(1)-N(3A)-C(6A)-C(7A)     | 148.6(18)  |
| C(10A)-N(3A)-C(6A)-C(5A)    | 173.3(19)  |
| Cu(1)-N(3A)-C(6A)-C(5A)     | -33(2)     |
| C(4A)-C(5A)-C(6A)-N(3A)     | 9(3)       |
| C(4A)-C(5A)-C(6A)-C(7A)     | -172(2)    |
| N(3A)-C(6A)-C(7A)-C(8A)     | -2(4)      |
| C(5A)-C(6A)-C(7A)-C(8A)     | 180(2)     |
| C(6A)-C(7A)-C(8A)-C(9A)     | 2(4)       |
| C(7A)-C(8A)-C(9A)-C(10A)    | 4(4)       |
| C(6A)-N(3A)-C(10A)-C(9A)    | 12(3)      |
| Cu(1)-N(3A)-C(10A)-C(9A)    | -143.3(18) |
| C(8A)-C(9A)-C(10A)-N(3A)    | -11(3)     |
| C(3A)-N(2A)-C(11A)-C(16A)   | 62(2)      |
| C(2A)-N(2A)-C(11A)-C(16A)   | -115.4(19) |
| C(3A)-N(2A)-C(11A)-C(12A)   | -117(2)    |
| C(2A)-N(2A)-C(11A)-C(12A)   | 66(2)      |
| C(16A)-C(11A)-C(12A)-C(13A) | 5(3)       |
| N(2A)-C(11A)-C(12A)-C(13A)  | -175.8(17) |
| C(11A)-C(12A)-C(13A)-C(14A) | 0(3)       |
| C(12A)-C(13A)-C(14A)-C(15A) | -5(4)      |
| C(12A)-C(13A)-C(14A)-Cl(2A) | 179.4(16)  |
| C(13A)-C(14A)-C(15A)-C(16A) | 5(3)       |
| Cl(2A)-C(14A)-C(15A)-C(16A) | -178.7(15) |
| C(12A)-C(11A)-C(16A)-C(15A) | -5(3)      |
| N(2A)-C(11A)-C(16A)-C(15A)  | 176.4(15)  |
| C(14A)-C(15A)-C(16A)-C(11A) | -1(3)      |
| C(2A)-Se(1A)-C(17A)-C(17B)  | -65.8(13)  |
| C(4B)-N(1B)-C(2B)-N(2B)     | -3(2)      |

|                             |            |
|-----------------------------|------------|
| Cu(1)-N(1B)-C(2B)-N(2B)     | 165.6(15)  |
| C(4B)-N(1B)-C(2B)-Se(1B)    | 176.2(14)  |
| Cu(1)-N(1B)-C(2B)-Se(1B)    | -15(3)     |
| C(3B)-N(2B)-C(2B)-N(1B)     | 2(2)       |
| C(11B)-N(2B)-C(2B)-N(1B)    | -178.9(18) |
| C(3B)-N(2B)-C(2B)-Se(1B)    | -176.9(13) |
| C(11B)-N(2B)-C(2B)-Se(1B)   | 2(2)       |
| C(17B)-Se(1B)-C(2B)-N(1B)   | -11.9(19)  |
| C(17B)-Se(1B)-C(2B)-N(2B)   | 167.3(15)  |
| C(2B)-N(2B)-C(3B)-O(1B)     | 174.3(17)  |
| C(11B)-N(2B)-C(3B)-O(1B)    | -5(3)      |
| C(2B)-N(2B)-C(3B)-C(4B)     | 0(2)       |
| C(11B)-N(2B)-C(3B)-C(4B)    | -179.2(16) |
| O(1B)-C(3B)-C(4B)-C(5B)     | 1(4)       |
| N(2B)-C(3B)-C(4B)-C(5B)     | 176(2)     |
| O(1B)-C(3B)-C(4B)-N(1B)     | -175.5(19) |
| N(2B)-C(3B)-C(4B)-N(1B)     | -1(2)      |
| C(2B)-N(1B)-C(4B)-C(5B)     | -174(2)    |
| Cu(1)-N(1B)-C(4B)-C(5B)     | 14(3)      |
| C(2B)-N(1B)-C(4B)-C(3B)     | 2(2)       |
| Cu(1)-N(1B)-C(4B)-C(3B)     | -169.6(12) |
| C(3B)-C(4B)-C(5B)-C(6B)     | -177(2)    |
| N(1B)-C(4B)-C(5B)-C(6B)     | -1(4)      |
| C(10B)-N(3B)-C(6B)-C(5B)    | -179.8(19) |
| Cu(1)-N(3B)-C(6B)-C(5B)     | -12(2)     |
| C(10B)-N(3B)-C(6B)-C(7B)    | 3(3)       |
| Cu(1)-N(3B)-C(6B)-C(7B)     | 171.7(14)  |
| C(4B)-C(5B)-C(6B)-N(3B)     | 0(4)       |
| C(4B)-C(5B)-C(6B)-C(7B)     | 176(2)     |
| N(3B)-C(6B)-C(7B)-C(8B)     | -3(3)      |
| C(5B)-C(6B)-C(7B)-C(8B)     | -179.9(18) |
| C(6B)-C(7B)-C(8B)-C(9B)     | -2(3)      |
| C(7B)-C(8B)-C(9B)-C(10B)    | 6(3)       |
| C(6B)-N(3B)-C(10B)-C(9B)    | 1(3)       |
| Cu(1)-N(3B)-C(10B)-C(9B)    | -167(2)    |
| C(8B)-C(9B)-C(10B)-N(3B)    | -6(4)      |
| C(2B)-N(2B)-C(11B)-C(12B)   | 59(2)      |
| C(3B)-N(2B)-C(11B)-C(12B)   | -122(2)    |
| C(2B)-N(2B)-C(11B)-C(16B)   | -123(2)    |
| C(3B)-N(2B)-C(11B)-C(16B)   | 55(2)      |
| C(16B)-C(11B)-C(12B)-C(13B) | 3(3)       |
| N(2B)-C(11B)-C(12B)-C(13B)  | -179.8(16) |
| C(11B)-C(12B)-C(13B)-C(14B) | -3(3)      |
| C(12B)-C(13B)-C(14B)-C(15B) | 2(4)       |
| C(12B)-C(13B)-C(14B)-Cl(2B) | 179.3(16)  |
| C(13B)-C(14B)-C(15B)-C(16B) | 0(3)       |
| Cl(2B)-C(14B)-C(15B)-C(16B) | -177.3(16) |
| C(14B)-C(15B)-C(16B)-C(11B) | -1(3)      |
| C(12B)-C(11B)-C(16B)-C(15B) | -1(3)      |
| N(2B)-C(11B)-C(16B)-C(15B)  | -178.4(16) |
| Se(1A)-C(17A)-C(17B)-Se(1B) | -170.5(9)  |

Table 25S. Hydrogen bonds for **6c** [ $\text{\AA}$  and  $^\circ$ ].

| D-H...A                | d(D-H) | d(H...A) | d(D...A)  | $\angle(\text{DHA})$ |
|------------------------|--------|----------|-----------|----------------------|
| C(5A)-H(5A)...O(1A)#1  | 0.93   | 2.62     | 3.483(18) | 155.5                |
| C(7A)-H(7A)...O(1A)#1  | 0.93   | 2.54     | 3.39(2)   | 152.6                |
| C(16A)-H(16A)...N(5)   | 0.93   | 2.53     | 3.19(3)   | 127.7                |
| C(7B)-H(7B)...O(2)     | 0.93   | 2.65     | 3.50(2)   | 151.7                |
| C(7B)-H(7B)...O(3)     | 0.93   | 2.41     | 3.25(3)   | 150.3                |
| C(9B)-H(9B)...Cl(2A)#2 | 0.93   | 2.77     | 3.49(2)   | 134.8                |
| C(19)-H(19C)...O(1B)#3 | 0.96   | 2.65     | 3.19(3)   | 116.2                |

---

Symmetry transformations used to generate equivalent atoms:

#1  $-x+2, -y+1, -z+1$  #2  $-x+1, -y+1, -z+1$  #3  $-x+2, y+1/2, -z+1/2$

## UV-vis spectra

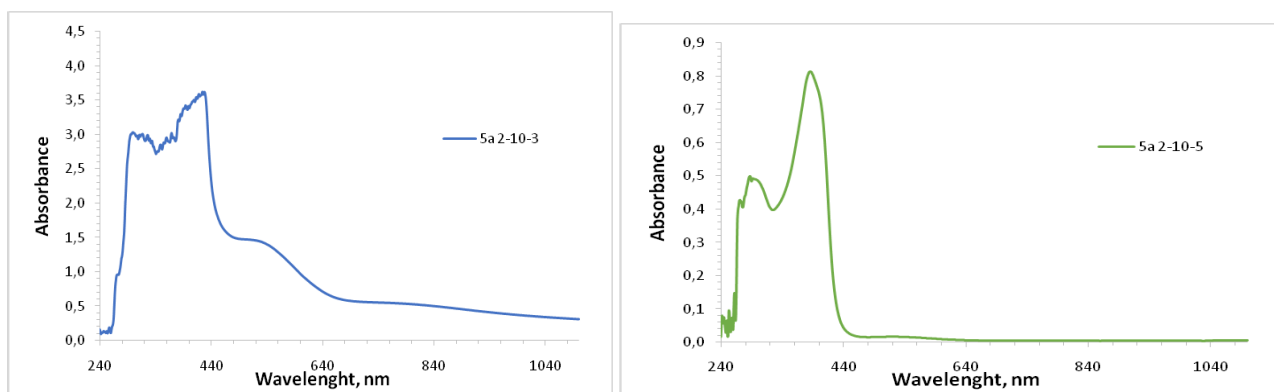

Figure 25S. Electronic spectra of coordination compound **5a** (DMF,  $2 \cdot 10^{-3} \text{ M}$  (left),  $2 \cdot 10^{-5} \text{ M}$  (right)).

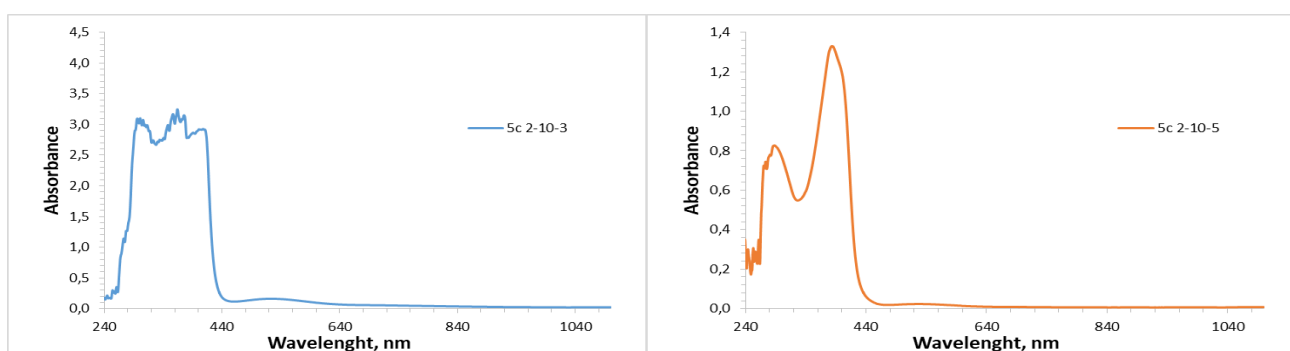

Figure 26S. Electronic spectra of coordination compound **5c** (DMF,  $2 \cdot 10^{-3} \text{ M}$  (left),  $2 \cdot 10^{-5} \text{ M}$  (right)).

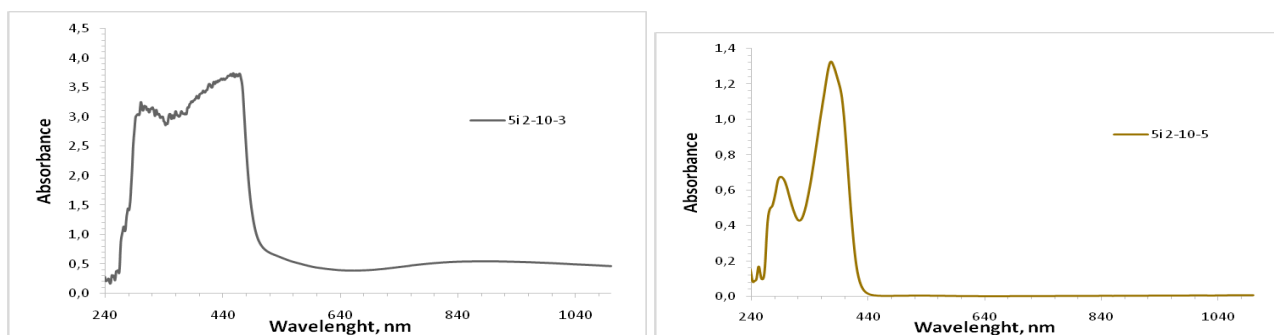

Figure 27S. Electronic spectra of coordination compound **5i** (DMF,  $2 \cdot 10^{-3} \text{ M}$  (left),  $2 \cdot 10^{-5} \text{ M}$  (right)).

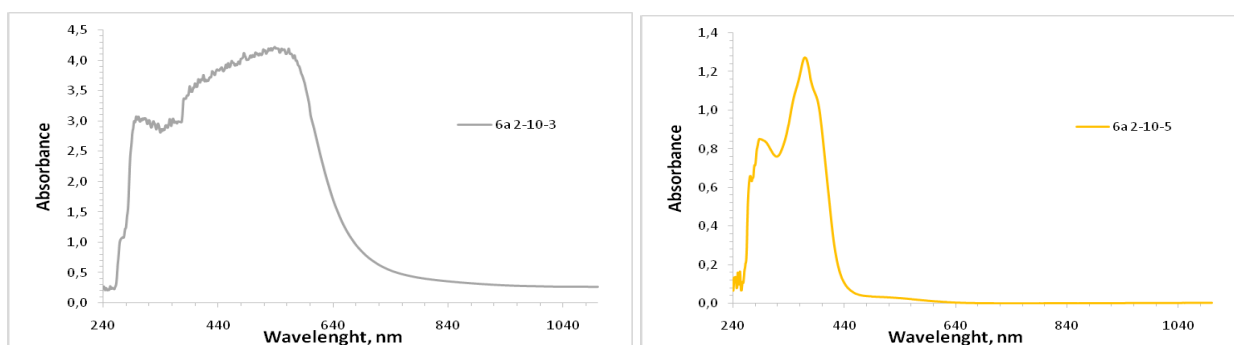

Figure 28S. Electronic spectra of coordination compound **6a** (DMF,  $2 \cdot 10^{-3} \text{ M}$  (left),  $2 \cdot 10^{-5} \text{ M}$  (right)).

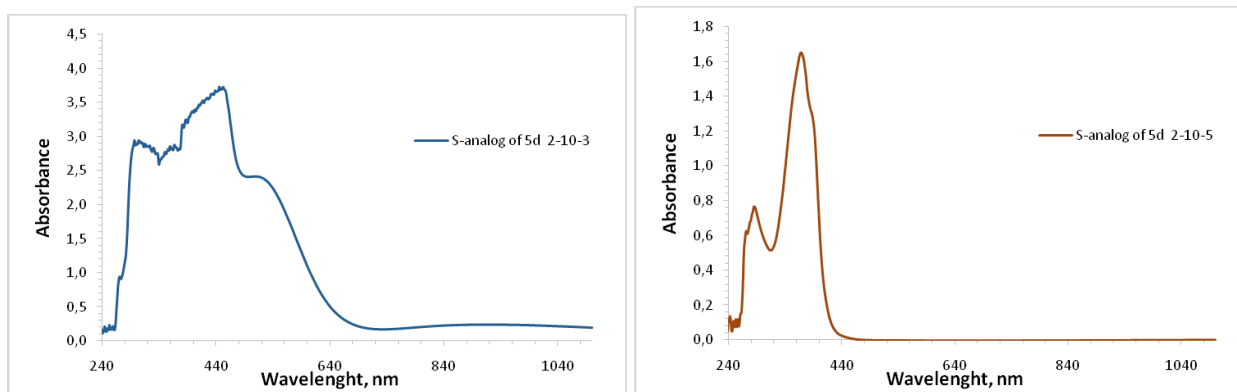

Figure 29S. Electronic spectra of S-analog of **5a** [A. G. Majouga, M. I. Zvereva, M. P. Rubtsova, D. A. Skvortsov, A. V. Mironov, D. M. Azhibek, O. O. Krasnovskaya, V. M. Gerasimov, A. V. Udina, N. I. Vorozhtsov, E. K. Beloglazkina, L. Agron, L.V. Mikhina, A. V. Tretyakova, N. V. Zyk, N. S. Zefirov, A. V. Kabanov, O. A. Dontsova, *J. Med. Chem.* 2014, 57, 6252-6258] (DMF,  $2 \cdot 10^{-3} \text{M}$  (left),  $2 \cdot 10^{-5} \text{M}$  (right)).

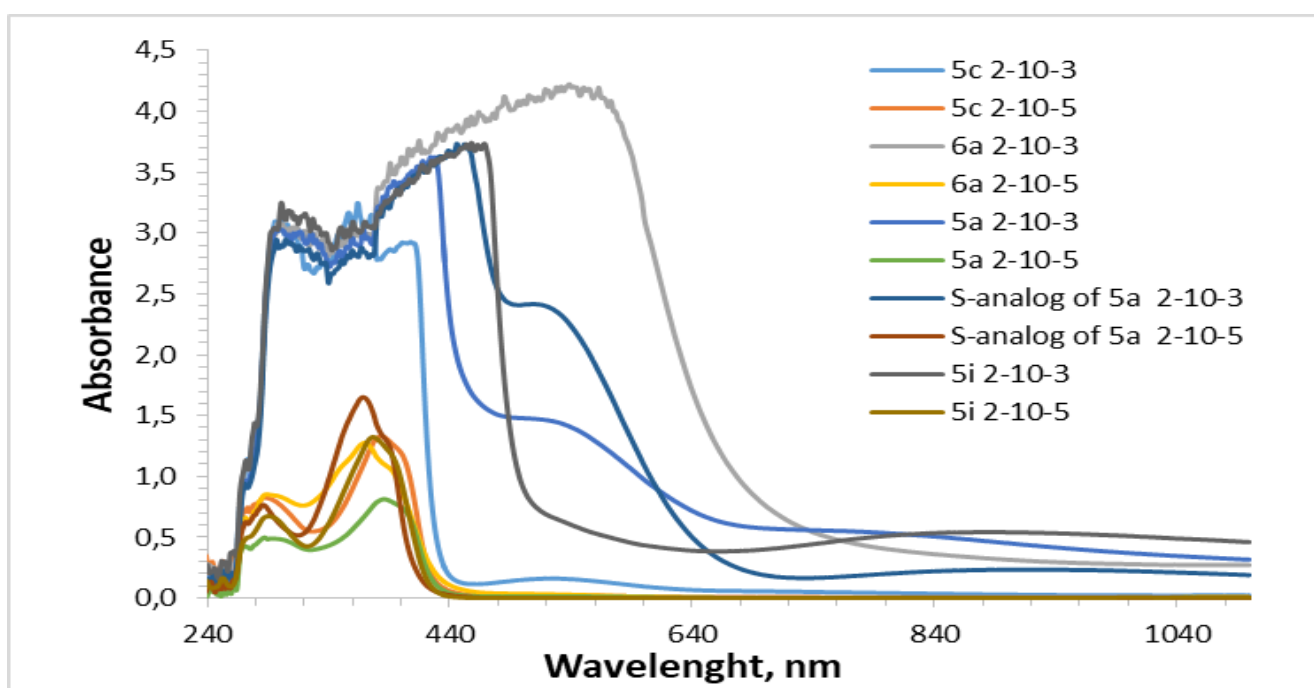

Figure 30S. Superposition of UV-vis spectra curves for complexes of different structural types (for details, see the legend in the figure).

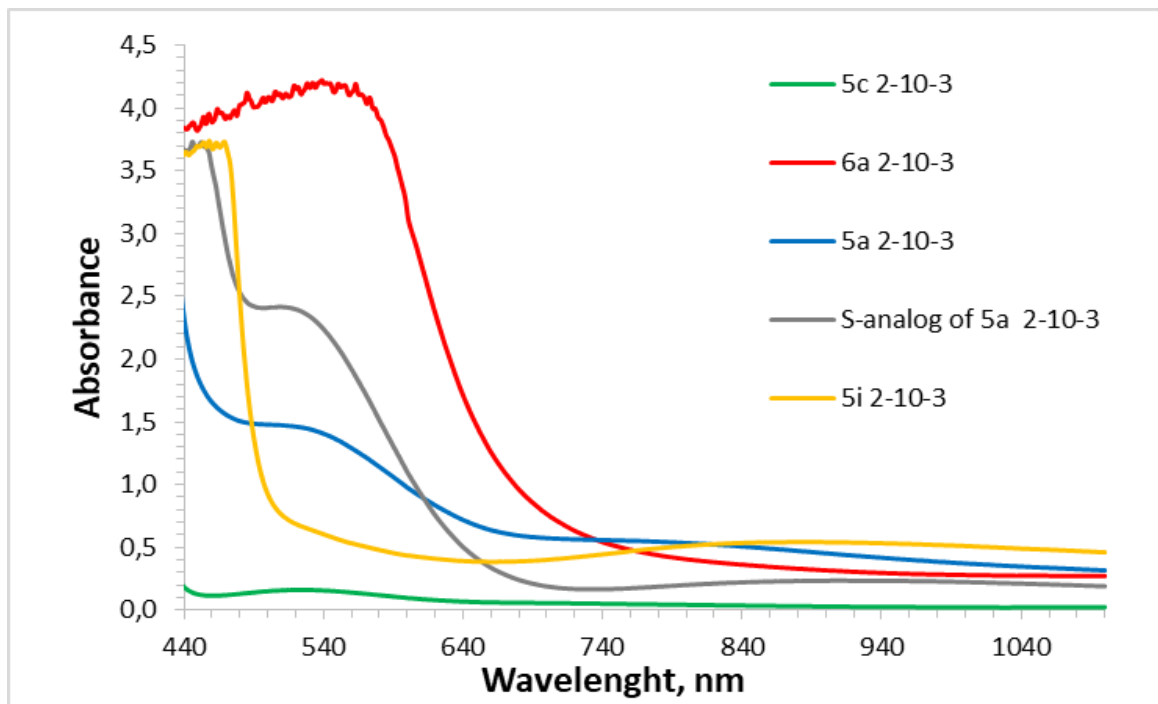

Figure 31S. Superposition of UV-vis spectra curves for complexes of different structural types in the visible region (for details, see the legend in the figure).

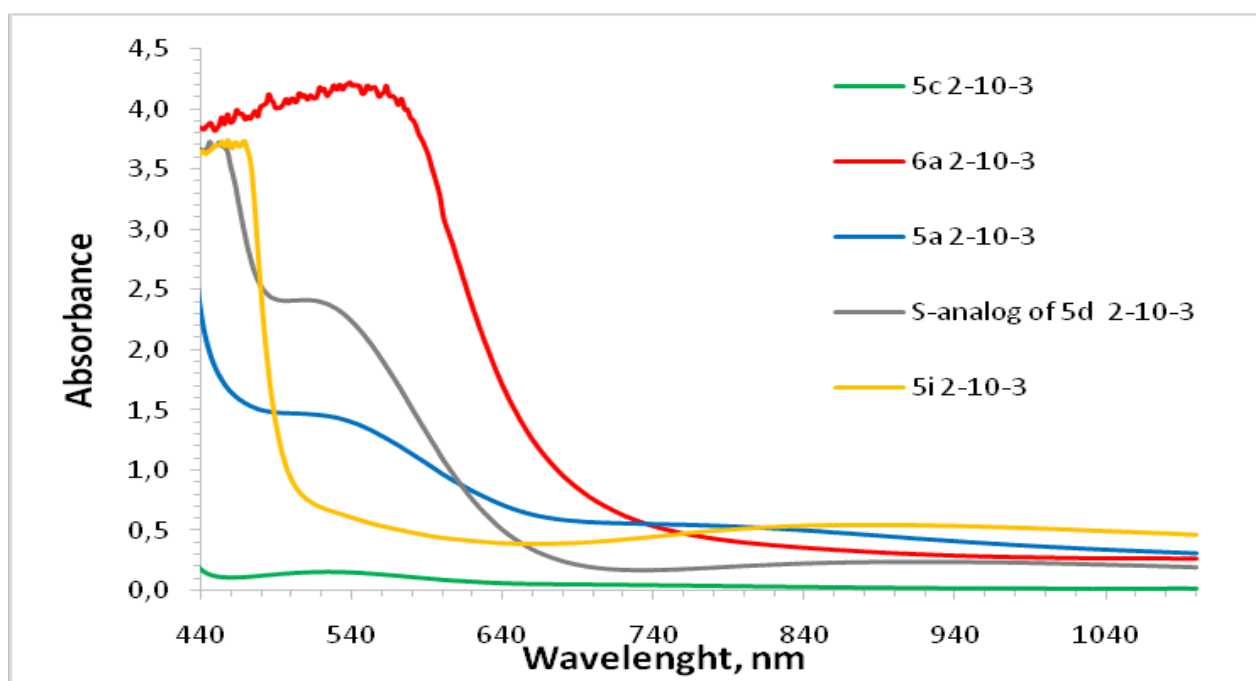

Figure 31S. Superposition of UV-vis spectra curves for complexes of different structural types in the UV-region (for details, see the legend in the figure).



### EPR spectra

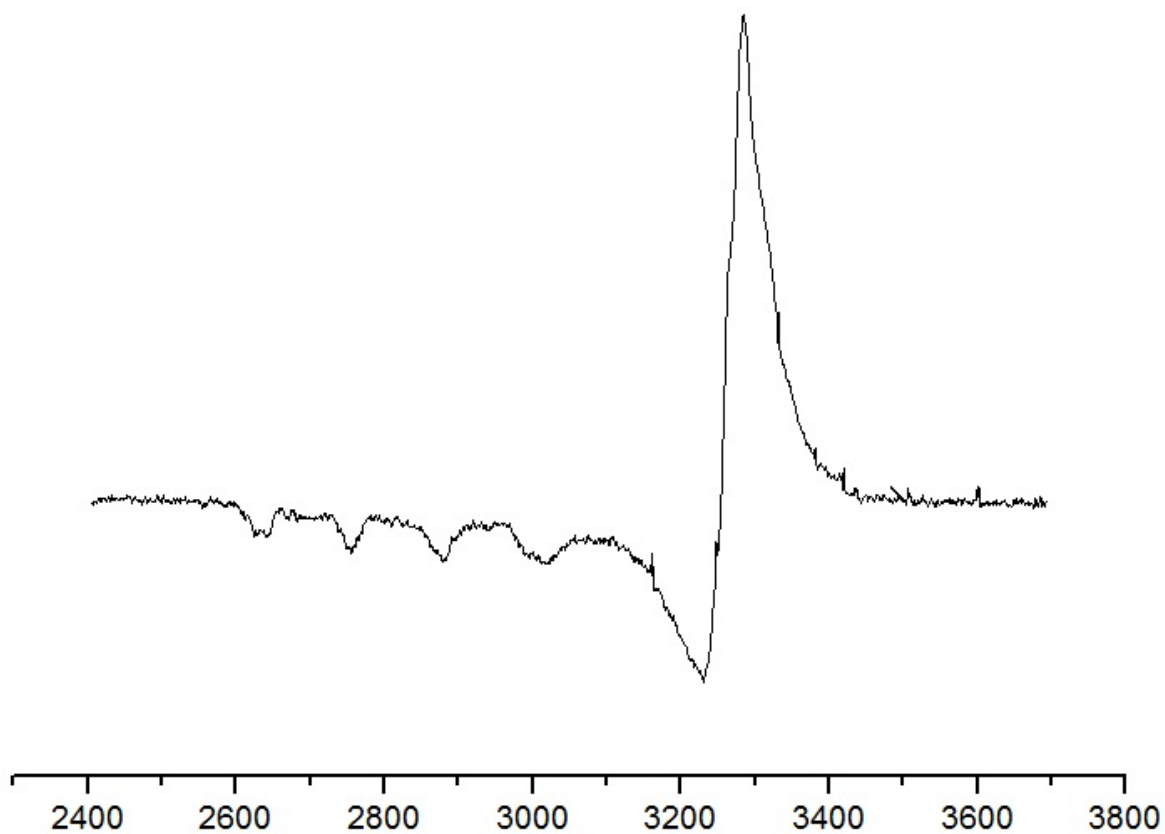

Figure 32S. EPR spectra for the complex **5a**.

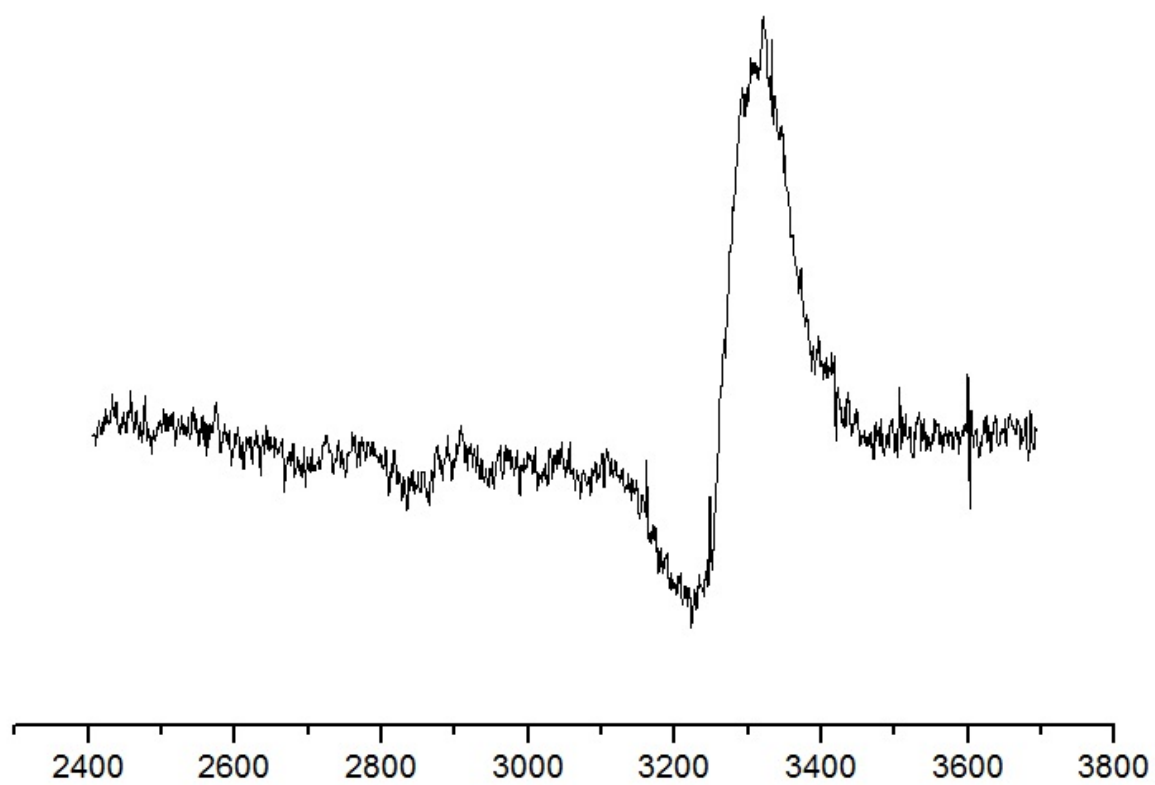

Figure 33S. EPR spectra for the complex **5c**.

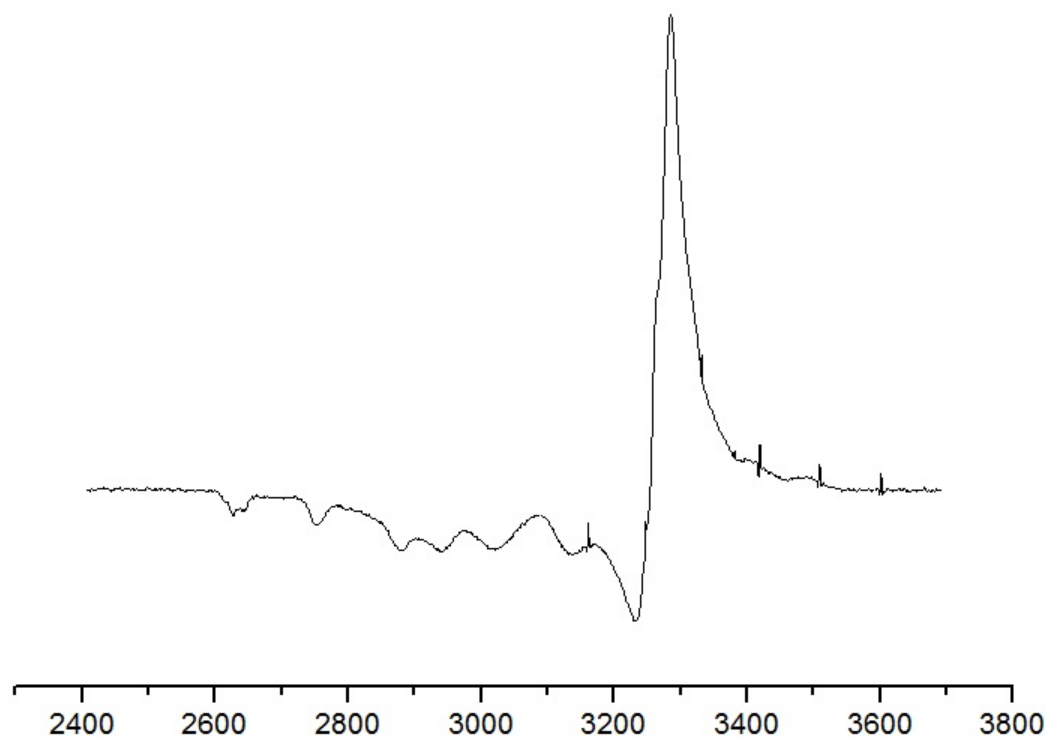

Figure 34S. EPR spectra for the complex **5i**.

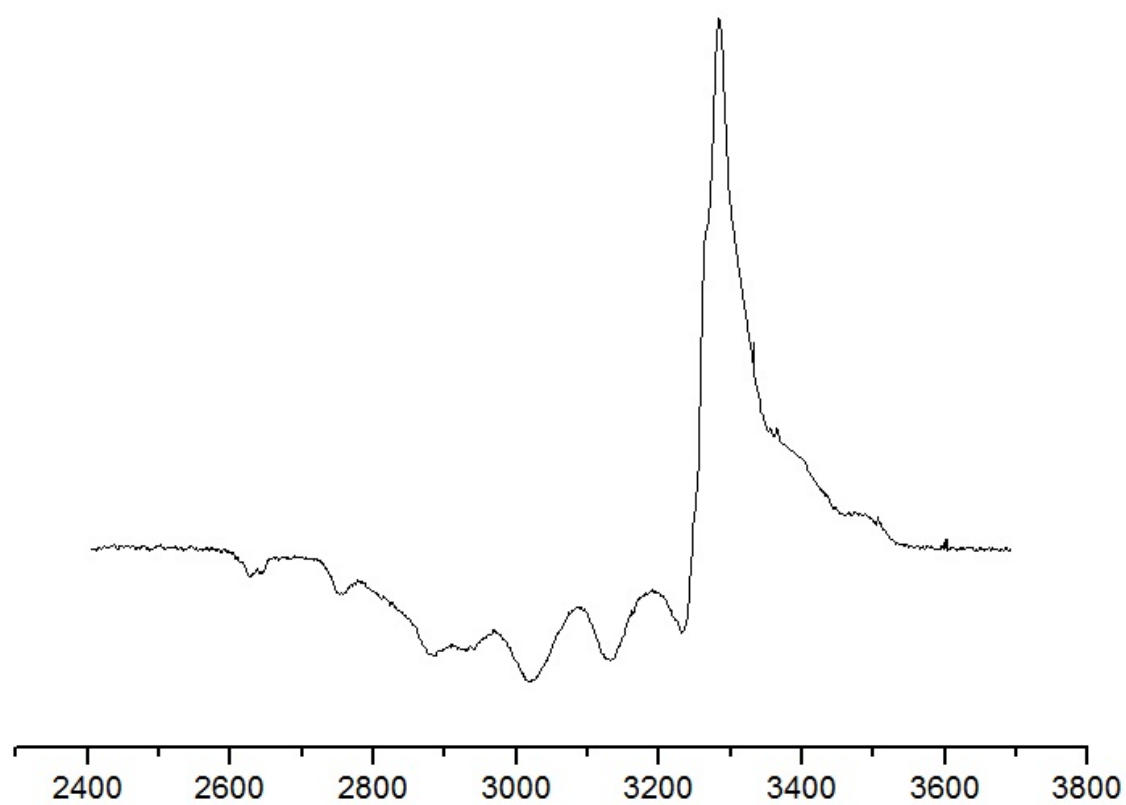

Figure 35S. EPR spectra for the S-analog of **5a**.

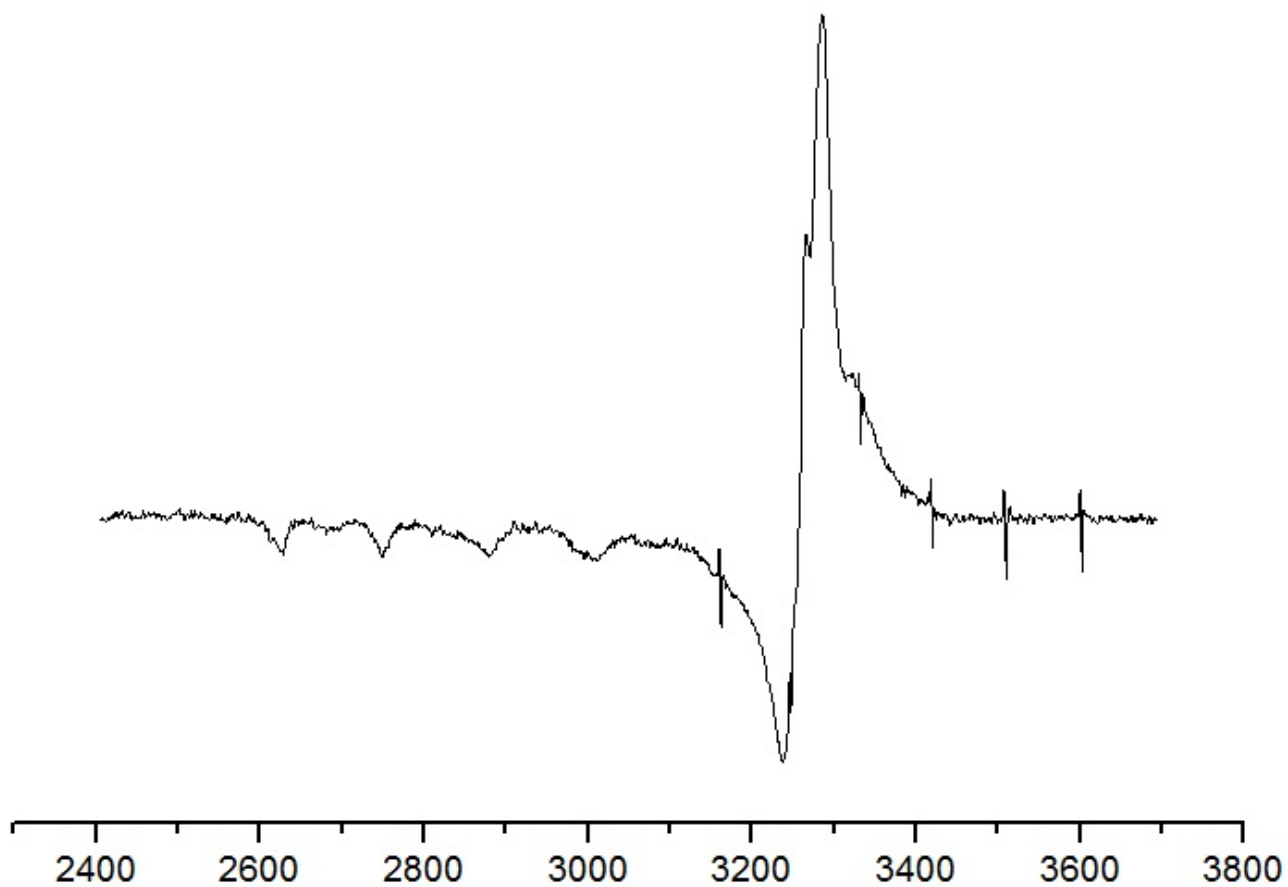

Figure 36S. EPR spectra for the complex **6a**.
